# Supplementary material for: Genomewide identification of genes involved in the potato response to drought indicates functional evolutionary conservation with Arabidopsis plants
Source: PubMed Central journal article supplement (PMC5787840; doi:10.1111/pbi.12800), 2017-08-14

**Table S1** The comparison of normalized number of reads for transcripts derived from genes searched out in the first round of selection (594 genes) during the time course of drought experiment. The gray color indicates the selected genes after the second round of selection.

Mean value of normalised reads per million for selected potato transcripts that were up-regulated in Tajfun comparing to Owacja. Data are shown for days: 0, 6, and 10 of drought experiment and were taken from three biological replicates. SD at D0 was always not statisticly significant ( $P > 0,05$ ), while SD at D6 and D10 were always statisticly significant ( $P < 0,05$ , see also Fig 5). Potato gene accession numbers were taken from Spud DB ([www.potato.plantbiology.msu.edu](http://www.potato.plantbiology.msu.edu)). SD - standard deviations.

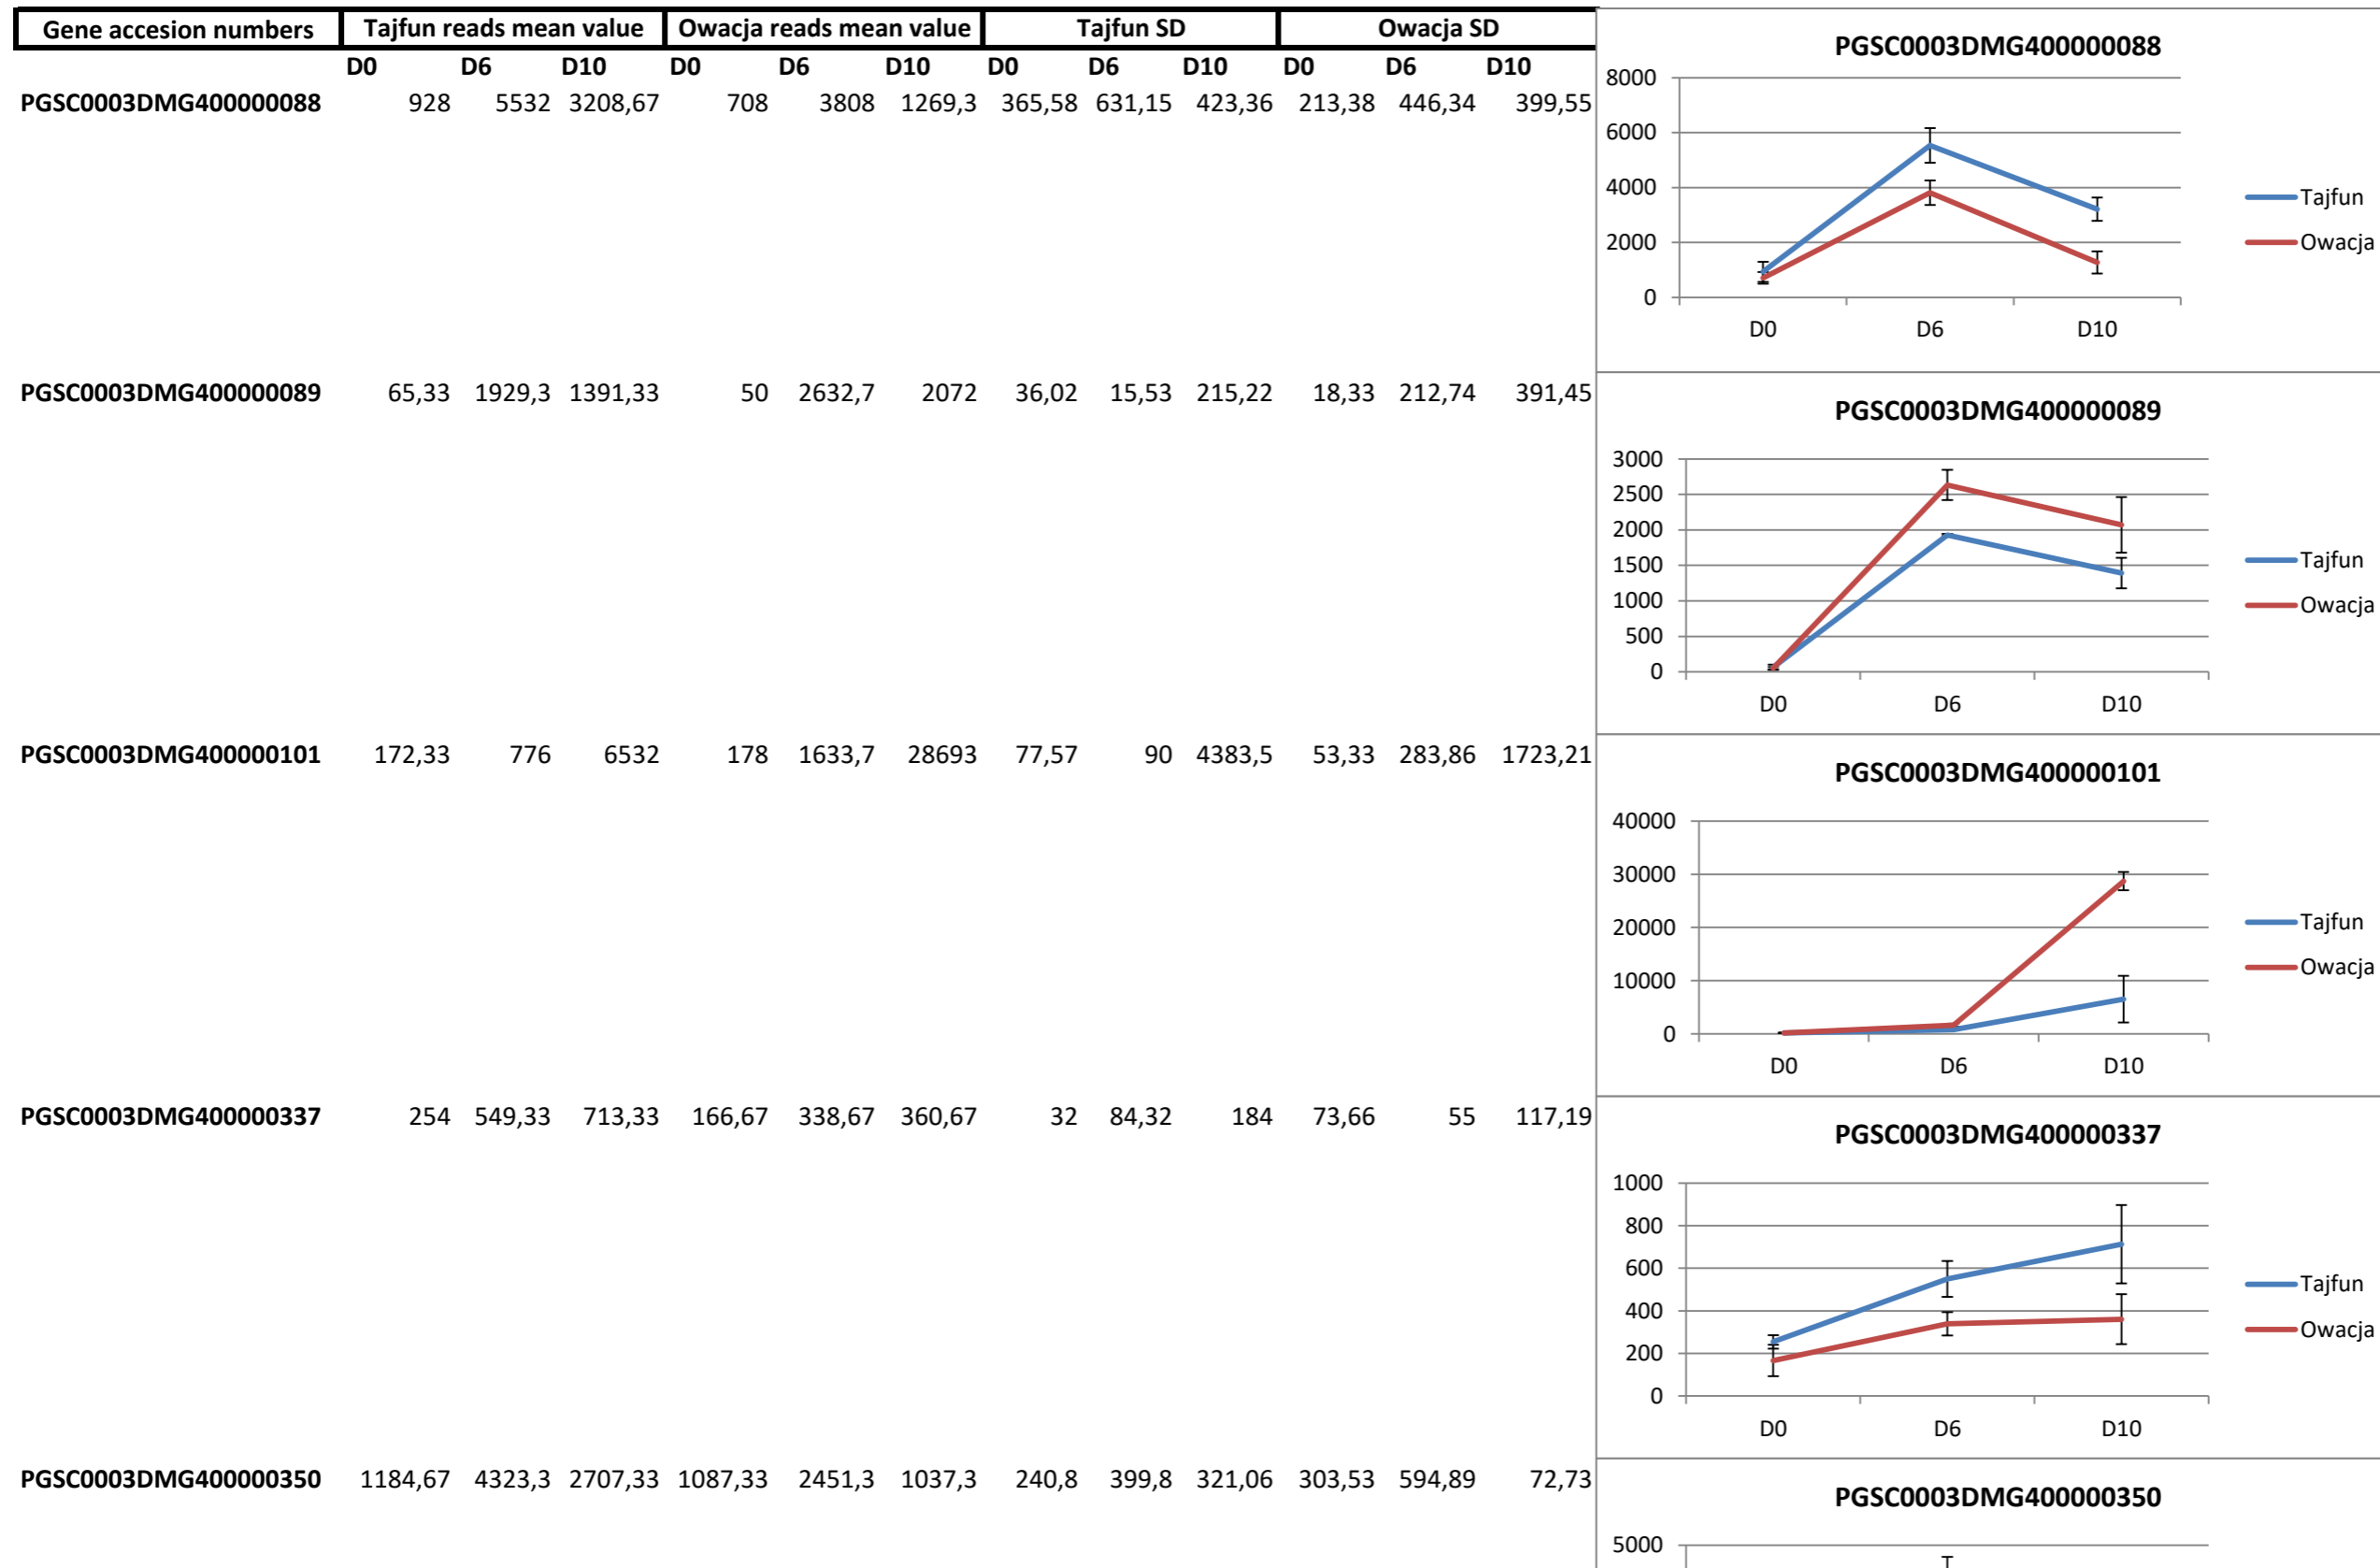

PGSC0003DMG400000396 1036,67 3428,7 3790 780 5538,7 7976 189,37 377,33 1105,1 143,93 447,52 330,68

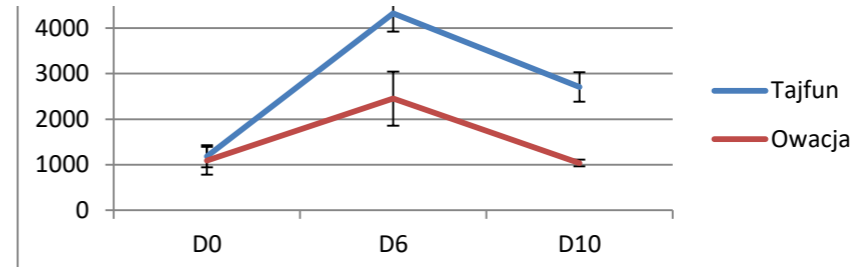

PGSC0003DMG400000411 104,67 1057,3 3540 93,33 1700 4994,7 17,47 235,14 1091,3 18,04 55,43 548,92

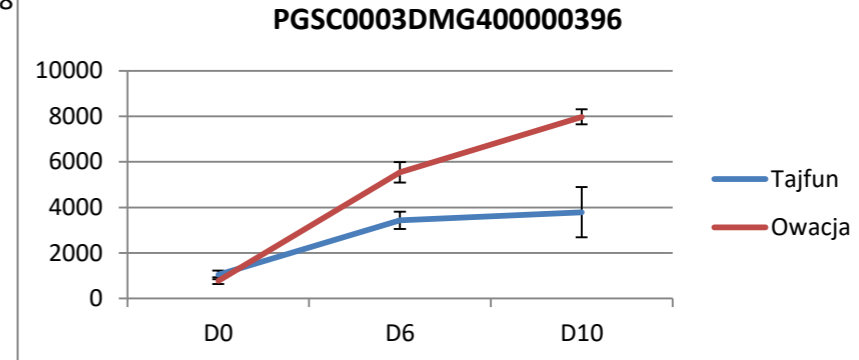

PGSC0003DMG400000457 2879,33 5918,7 14667,3 2607,33 9888,7 22069 536,14 665,01 1628 1005,1 442,41 3080,08

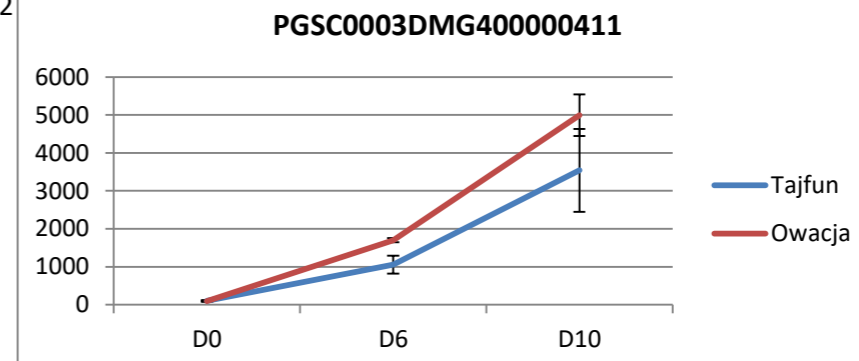

PGSC0003DMG400000618 3916,67 10609 13733,3 4740 6800 7520,7 622,67 1298,7 1101,1 1214,5 938,27 565,34

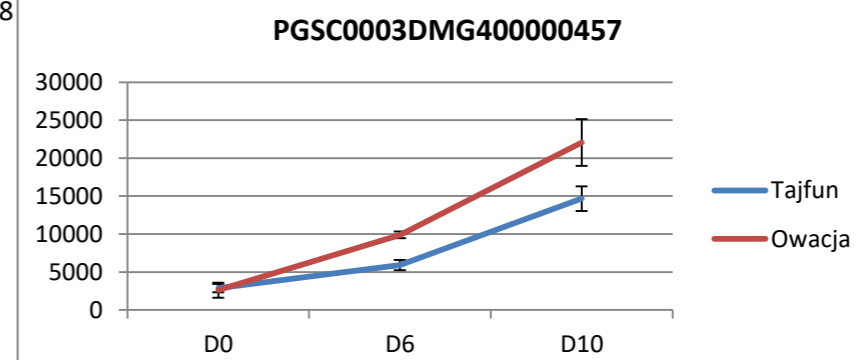

PGSC0003DMG400000654 519,33 1518,7 1556,67 378 764,67 442 169,9 250,71 333,24 45,21 118,28 149,01

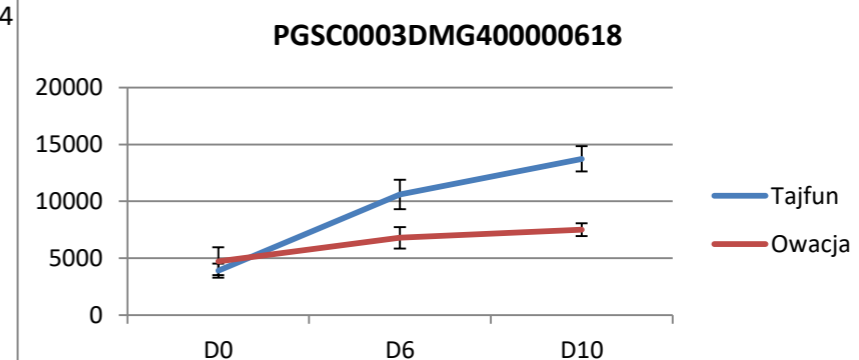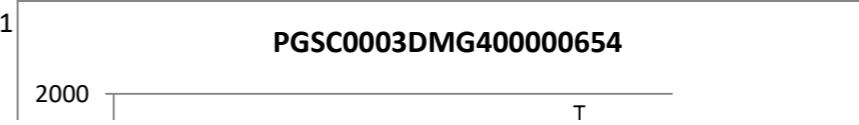

PGSC0003DMG40000758 3,33 265,33 242,67 9,33 17,33 56 5,77 40,22 62,01 11,37 15,01 17,09

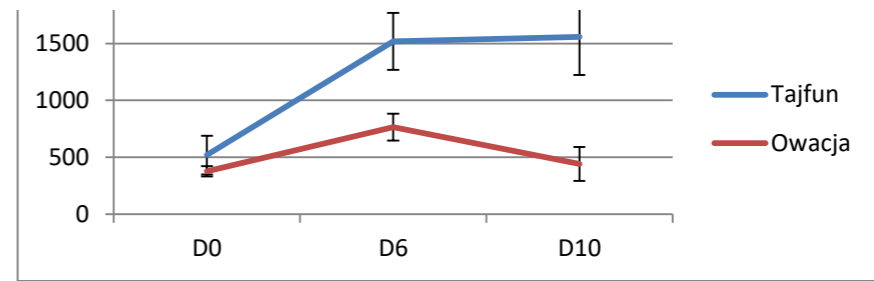

PGSC0003DMG40000758

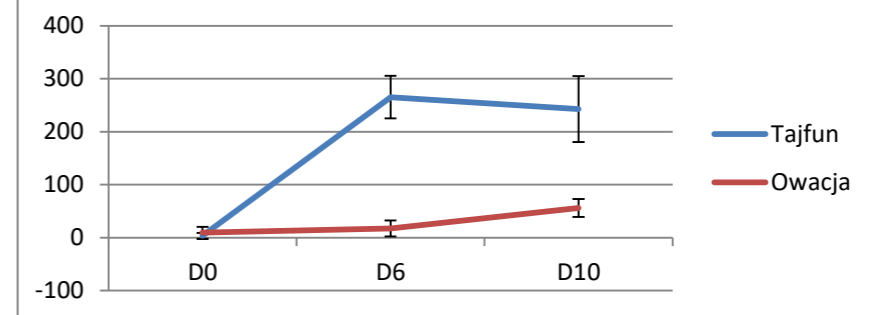

PGSC0003DMG40000839 85,33 353,33 306,67 53,33 144 42 52,62 83,58 56,62 26,1 22,27 7,21

PGSC0003DMG40000839

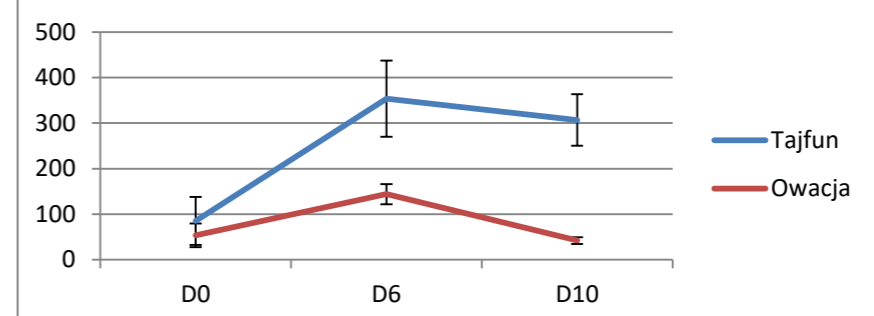

PGSC0003DMG40000944 655 1667 2442,33 445 1120,7 826 205,01 309,4 440,85 73,67 316,96 239,76

PGSC0003DMG40000944

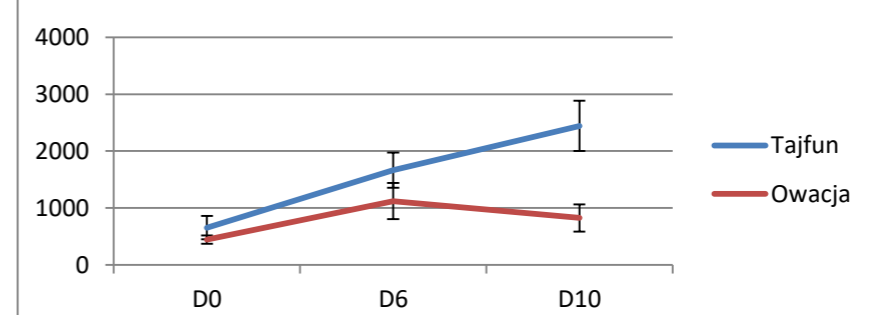

PGSC0003DMG40000978 822,67 3087,3 4250 1077,33 4352,7 5794 24,19 67,09 1085,1 142,44 43,92 410,13

PGSC0003DMG40000978

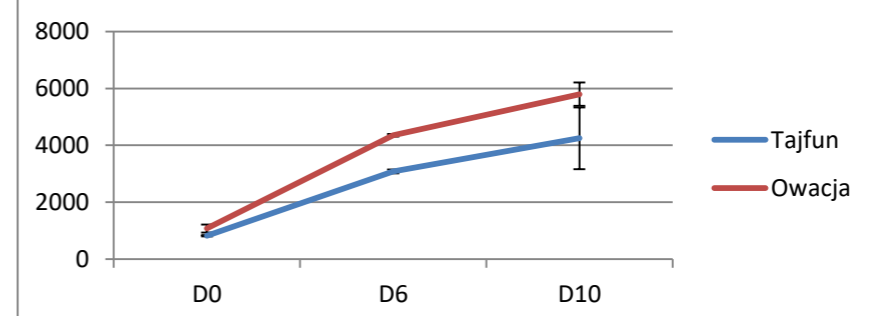

PGSC0003DMG40000999 115,33 508 422 71,33 303,33 188,67 23,18 100,54 161,98 39,72 21,57 10,26

PGSC0003DMG40000999

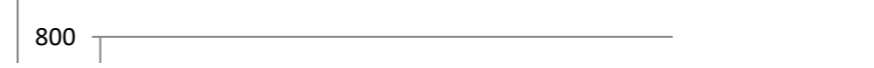

PGSC0003DMG400001152 1153,33 2399,3 2892 815,33 1418,7 1400,7 172,1 142,57 435,57 95,09 312,26 224,5

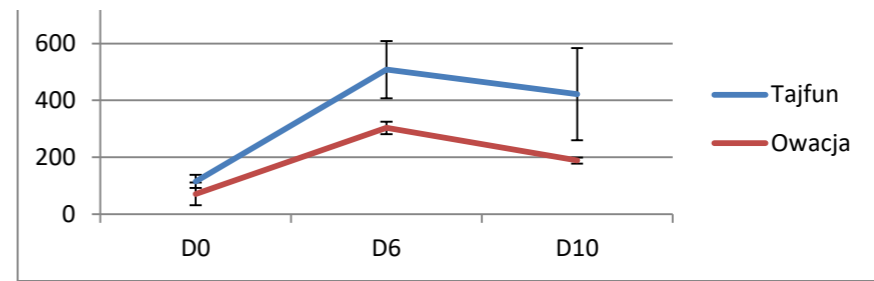

PGSC0003DMG400001152

PGSC0003DMG400001474 640,67 2635,3 2451,33 862 3864,7 4086 89,49 300,95 568,46 235,25 650,11 314,69

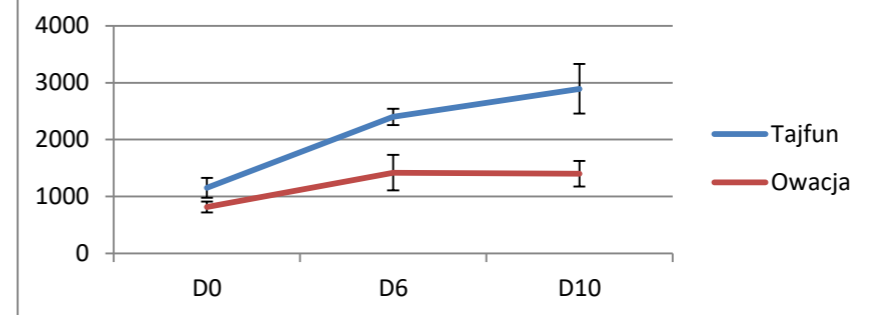

PGSC0003DMG400001474

PGSC0003DMG400001506 663,33 2152,7 2500 564,67 1356,7 1203,3 142 91,53 322,3 92,61 368,92 327,44

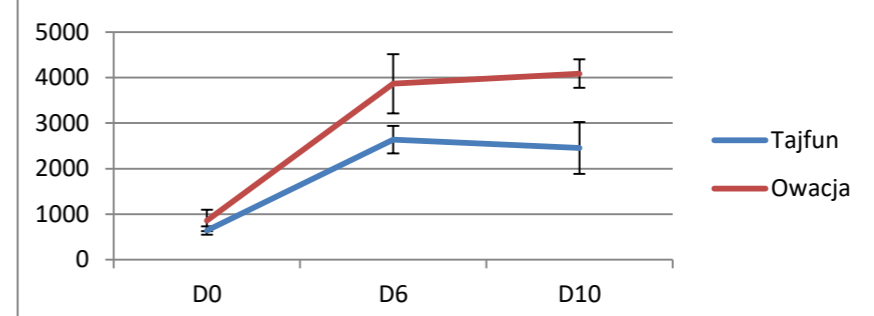

PGSC0003DMG400001506

PGSC0003DMG400001770 138 421,33 310,67 78 195,33 133,33 54,44 125,93 27,3 39,34 8,33 9,87

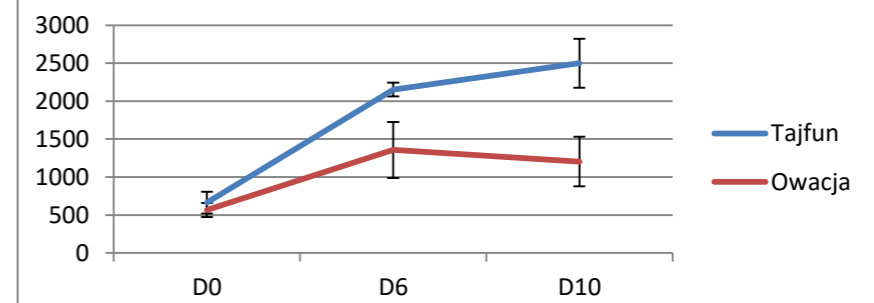

PGSC0003DMG400001770

PGSC0003DMG400001771 112 459,33 504 76,67 221,33 205,33 28,35 32,88 88,48 18,58 83 61,33

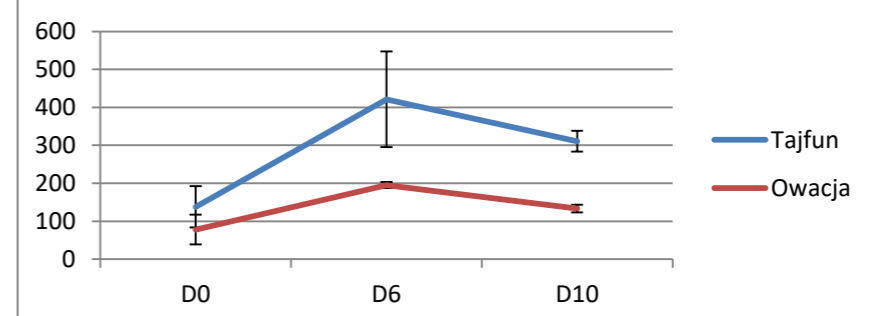

PGSC0003DMG400001771

800

PGSC0003DMG400001788 274 934,67 654,67 177,33 391,33 228 85,58 103 128,78 74,63 94,96 27,78

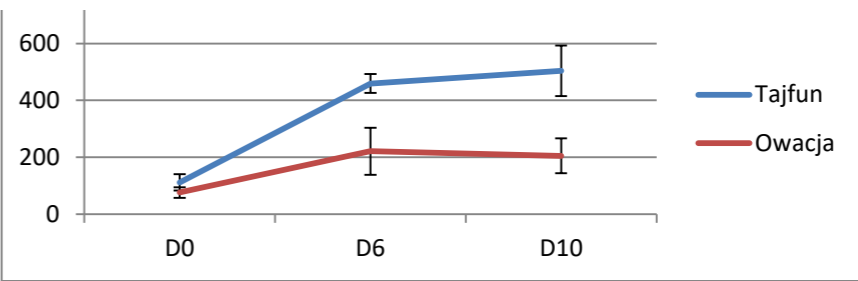

PGSC0003DMG400002489 106 270,67 242,67 93,33 397,33 360,67 6 14,05 28,59 33,31 78,55 36,95

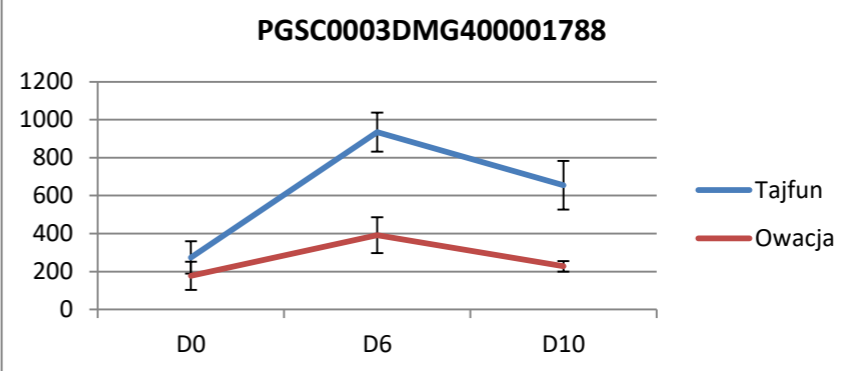

PGSC0003DMG400002585 140,67 364,67 351,33 109,33 209,33 130,67 18,04 37 81,4 11,72 5,03 32,58

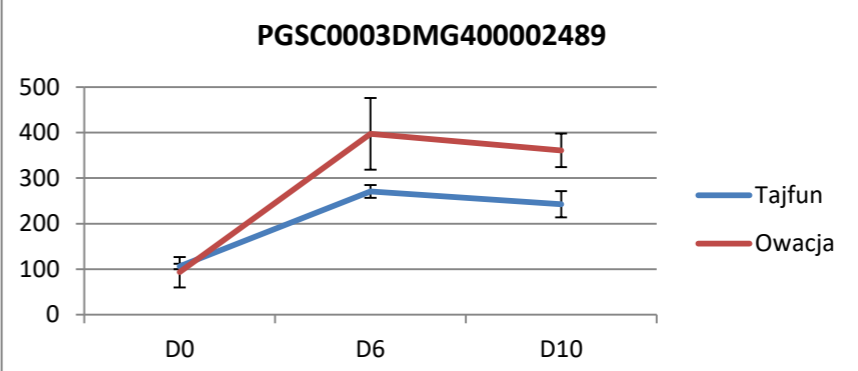

PGSC0003DMG400002613 1840,67 7063,3 6537,33 1867,33 13165 9333,3 591 1841,1 332,62 277,48 691,62 3071,99

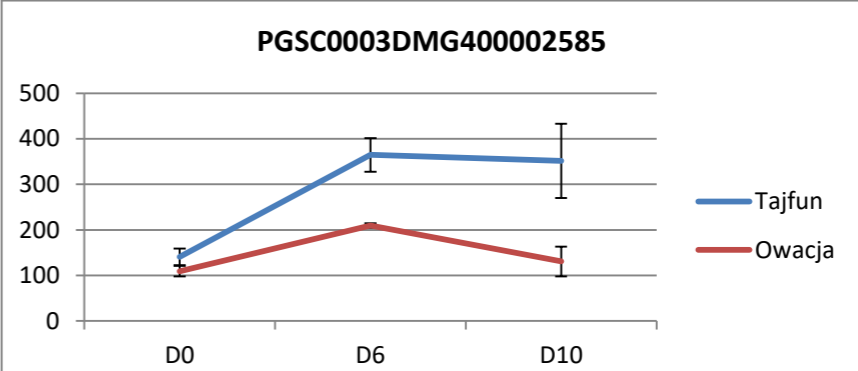

PGSC0003DMG400002684 3008 6083,3 7408,67 2821,33 3648 3002,7 767 558,32 1586,8 153,31 360,41 243,07

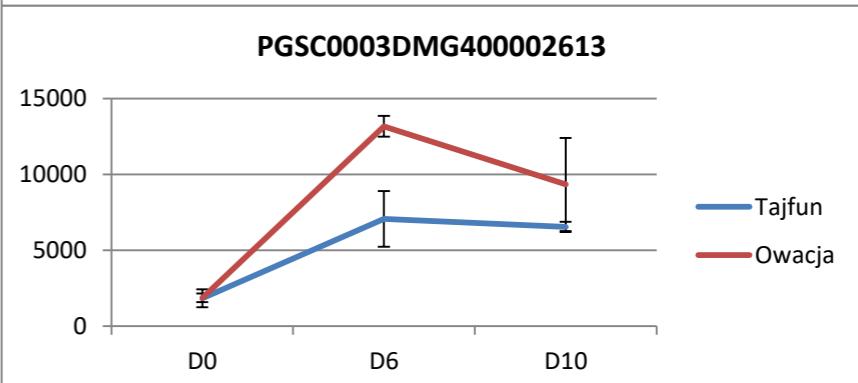

PGSC0003DMG400002684 3008 6083,3 7408,67 2821,33 3648 3002,7 767 558,32 1586,8 153,31 360,41 243,07

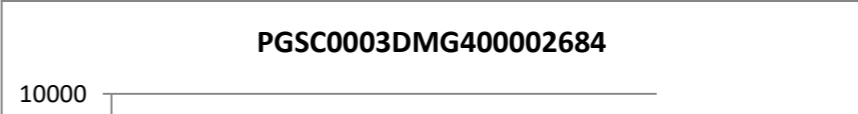

PGSC0003DMG400002746 498 1108,7 1351,33 324,67 621,33 518,67 215,03 196,67 196,57 64,29 143,42 85,54

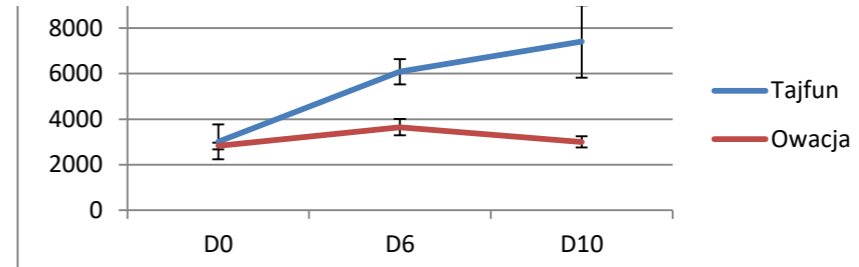

PGSC0003DMG400002746

PGSC0003DMG400002845 958 2300 2151,33 1244 3130 3969,3 317,21 172,31 364,93 369,04 189,07 477,42

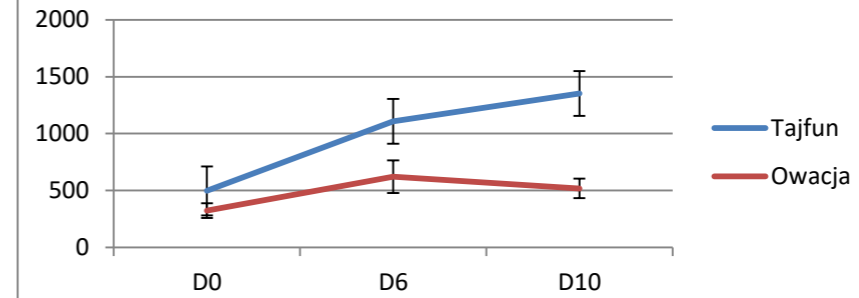

PGSC0003DMG400002845

PGSC0003DMG400002860 1671,33 3322 4222,67 1846,67 2443,3 2576,7 265,1 428,53 593,03 311,75 459,58 238,01

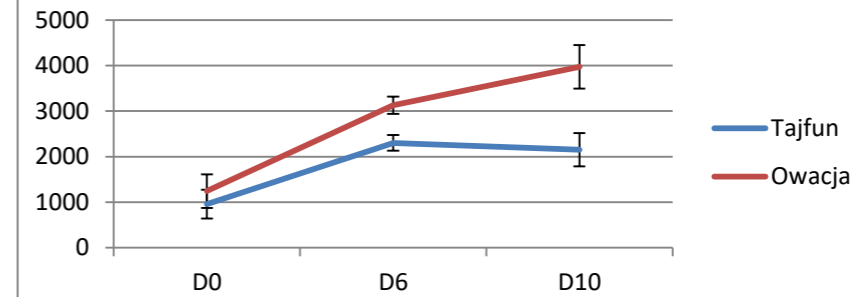

PGSC0003DMG400002860

PGSC0003DMG400002929 7952,67 17227 64494 7414,33 10979 13005 584,11 1245,2 14591 867,7 552,18 3124,03

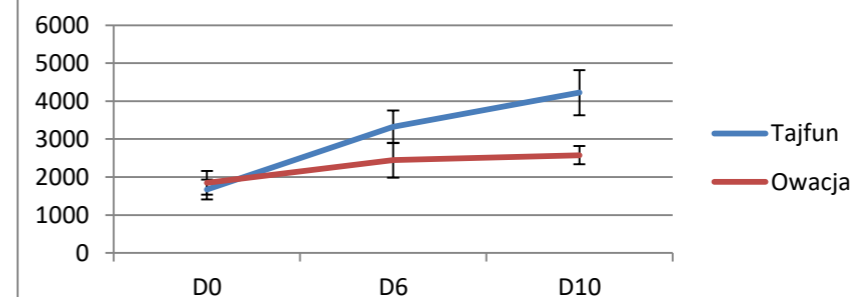

PGSC0003DMG400002929

PGSC0003DMG400003048 3673,33 8775,3 9390,33 3430,67 12035 12483 522,68 952,49 1888,5 589,62 1089,8 1463,31

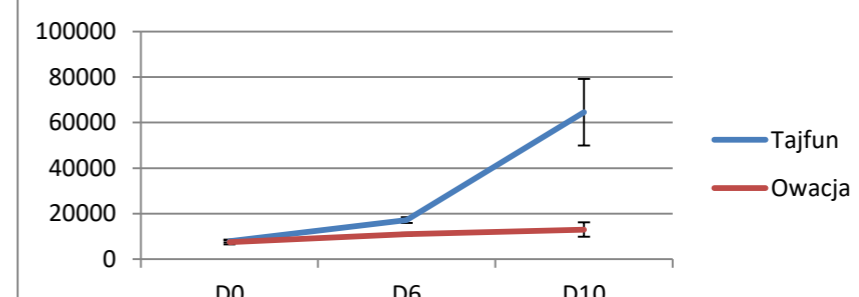

PGSC0003DMG400003048

15000 T

PGSC0003DMG400003051 1232,67 2597,3 2486,67 1067,33 1815 984,67 240,01 239,45 397,14 73,28 141,9 134,6

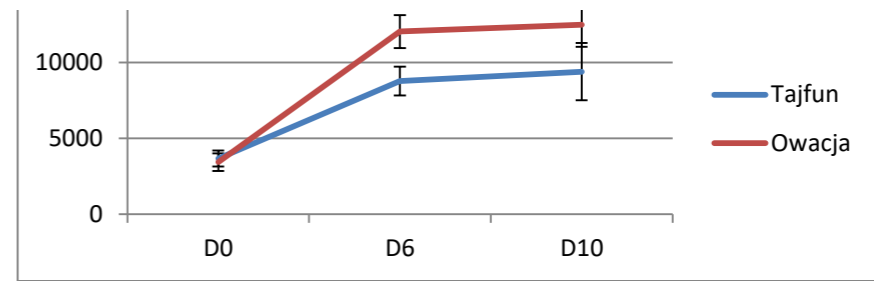

PGSC0003DMG400003051

PGSC0003DMG400003083 3986 40014 37721,3 3356,67 52951 22857 194,08 1304,5 8160,7 1562,8 10787 837,07

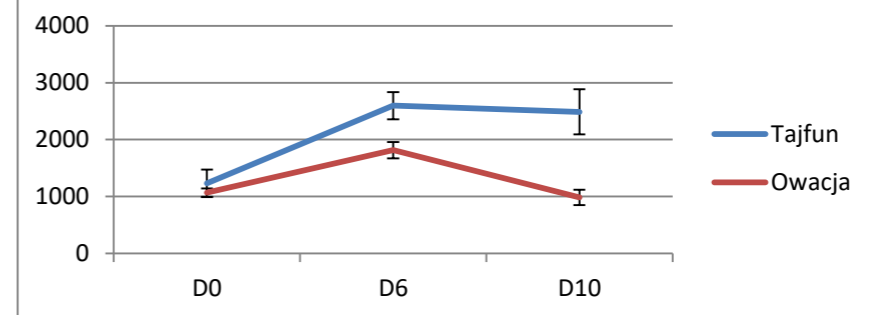

PGSC0003DMG400003083

PGSC0003DMG400003528 336,67 978 3186,67 413,33 1364 4910,7 126,62 35,38 1342,2 130,73 288,17 695,11

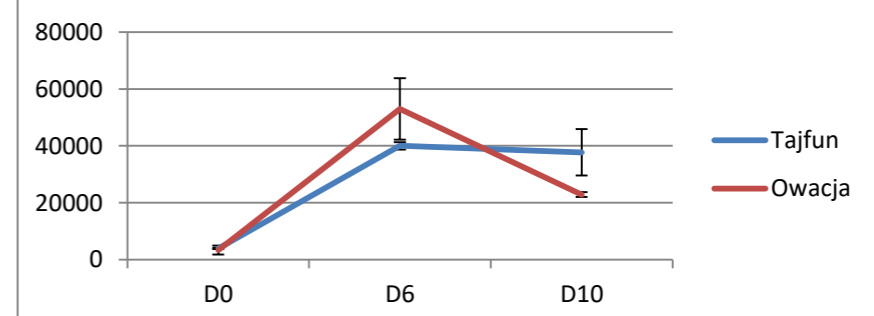

PGSC0003DMG400003528

PGSC0003DMG400003649 44,67 1286,7 1564,67 14 793,33 250,67 32,15 285,41 589 10,39 121,92 46,06

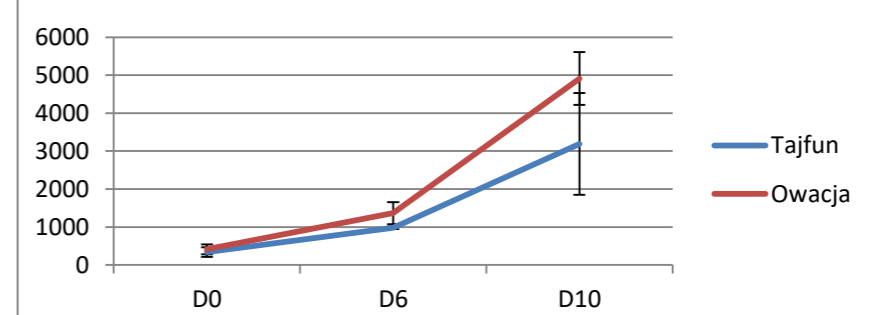

PGSC0003DMG400003649

PGSC0003DMG400003688 86 742 825,33 131,33 340 306 73,51 273,27 144,42 32,58 15,87 35,16

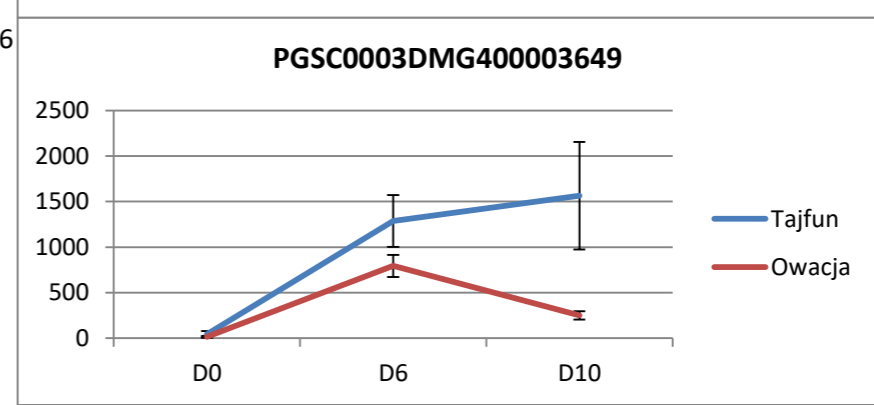

PGSC0003DMG400003688

1200

PGSC0003DMG400004010 23,33 589,33 476 20 273,33 127,67 40,41 185,32 170,13 17,32 99,38 36,09

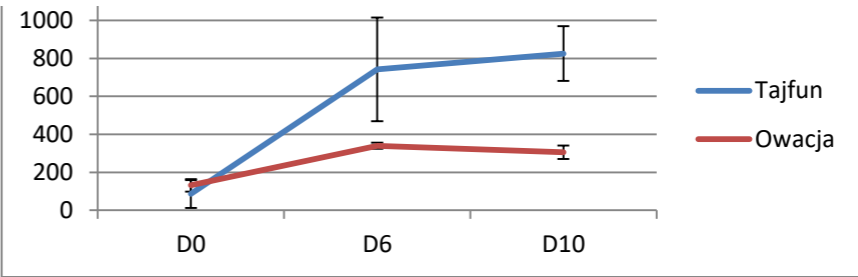

PGSC0003DMG400004010

PGSC0003DMG400004029 10 195,33 13669,3 44,67 1944,7 43965 11,14 98,48 14673 43,1 484,93 5231,87

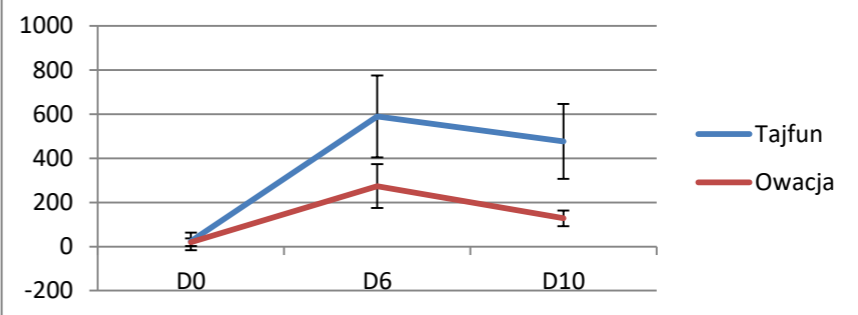

PGSC0003DMG400004029

PGSC0003DMG400004233 112,67 390,67 326,67 152,67 1630 2116,7 108,3 78,42 103,58 75,96 281,05 300,88

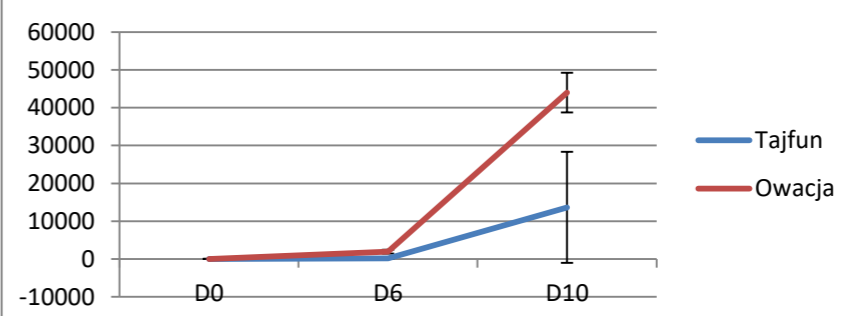

PGSC0003DMG400004233

PGSC0003DMG400004286 150 456 641,33 78,67 273,33 312,67 44,23 5,29 104,64 55,51 24,68 111,79

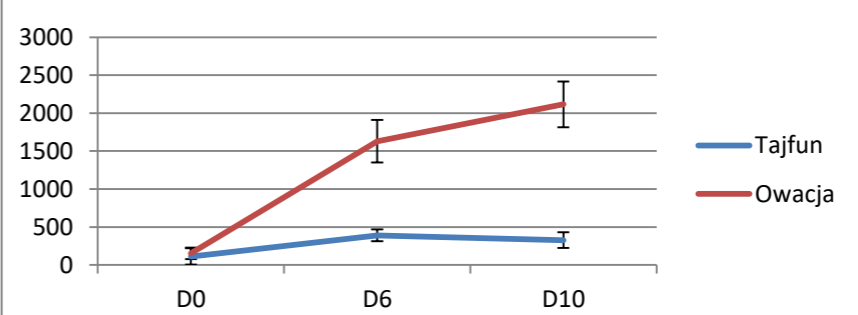

PGSC0003DMG400004286

PGSC0003DMG400004532 2,67 27,33 217,33 16 72 580 3,06 20,03 182,49 9,17 18,33 227,17

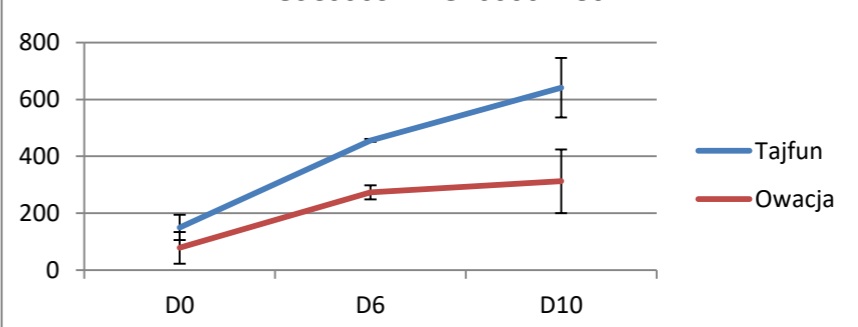

PGSC0003DMG400004532

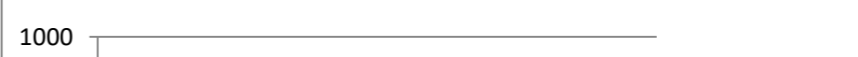



PGSC0003DMG400004630 2255,33 12929 30312 1720,67 19443 52417 583,85 990,31 8871,9 585,53 3018,6 3330,37

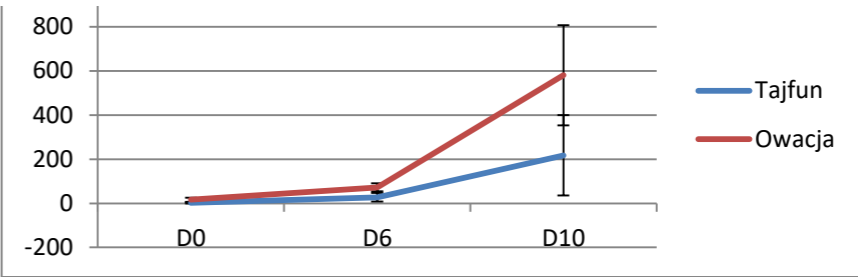

PGSC0003DMG400004802 1780 4617,3 7805,33 1567,33 6752,7 11383 159,76 1210,4 3551,2 667,79 557,43 679,42

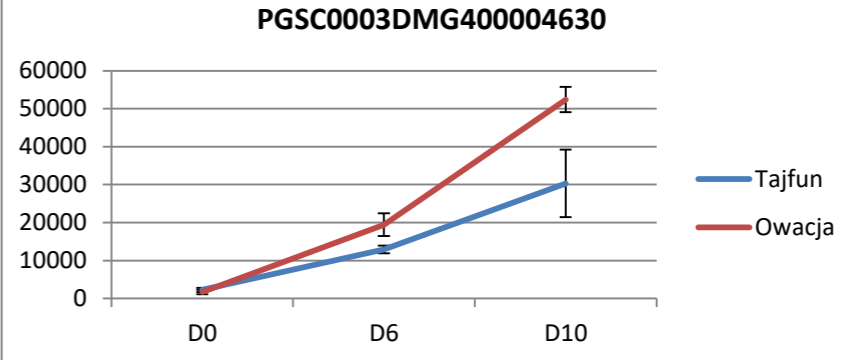

PGSC0003DMG400005009 72 342,67 266 22 178 126 45,3 47,51 77,95 19,08 77,25 6,93

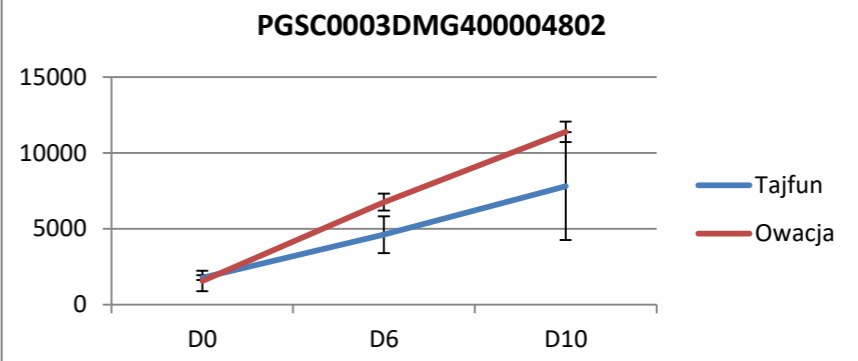

PGSC0003DMG400005056 260 513,33 2052,67 173,67 828,67 4394 143,37 63,29 752,87 67,28 67,42 1581,64

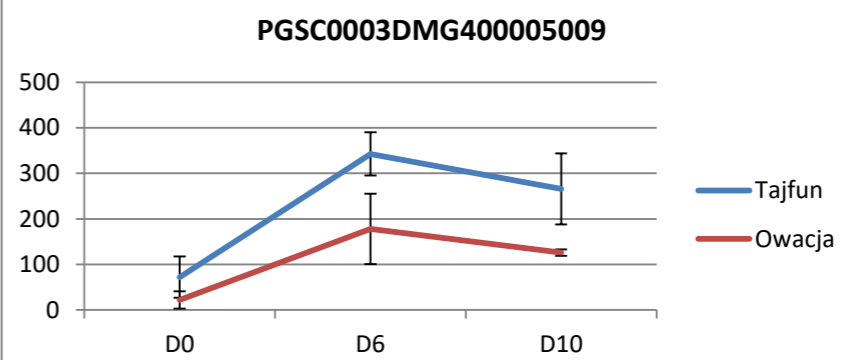

PGSC0003DMG400005247 976 1874 1952 1096,67 1339,3 1076,7 66,84 211,4 45,21 136,27 132,02 175,78

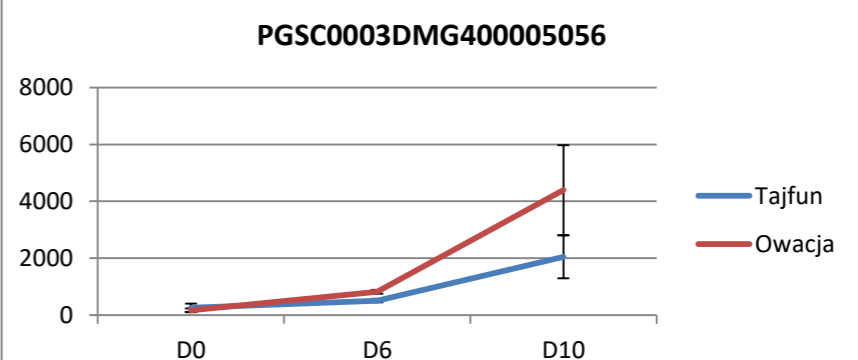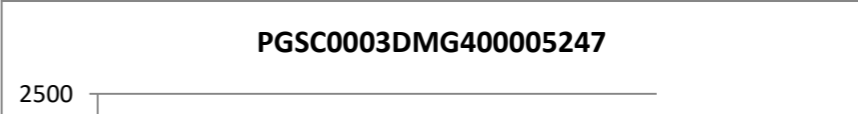

**PGSC0003DMG400005731** 1774 7064,7 5801,33 1082 1407,3 1202,7 207,18 1313,2 1218,1 378,48 303,16 356,23

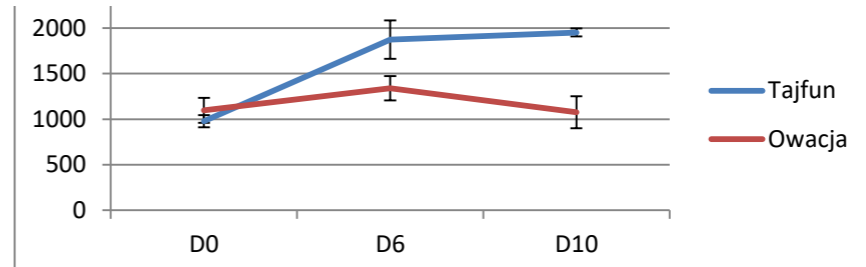

**PGSC0003DMG400005731**

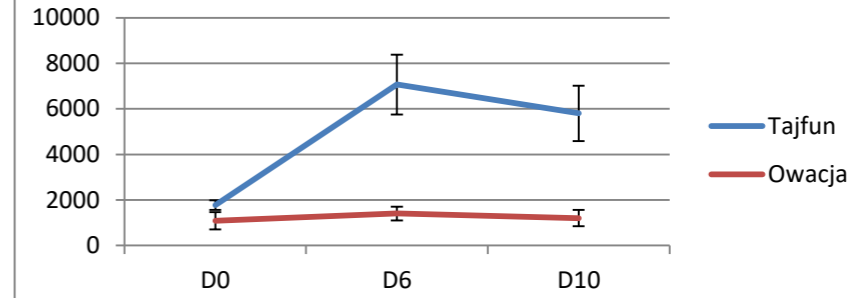

**PGSC0003DMG400005738** 1267,33 7583,3 6865,67 1076,67 5153,3 3842 143,34 307,56 227,5 403,39 926,51 397,14

**PGSC0003DMG400005738**

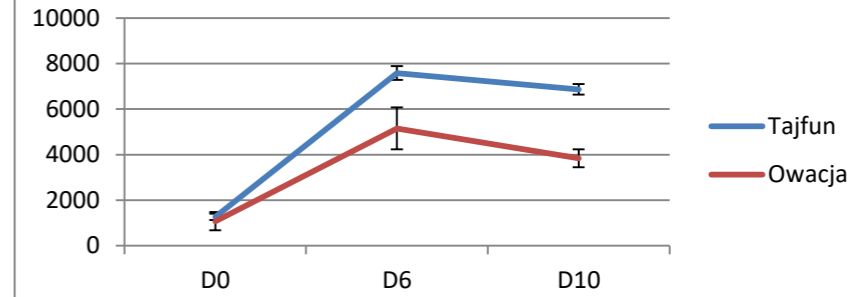

**PGSC0003DMG400005917** 39,33 164,67 146,67 41,33 84,67 28,67 9,45 31,01 56,86 13,01 43 12,22

**PGSC0003DMG400005917**

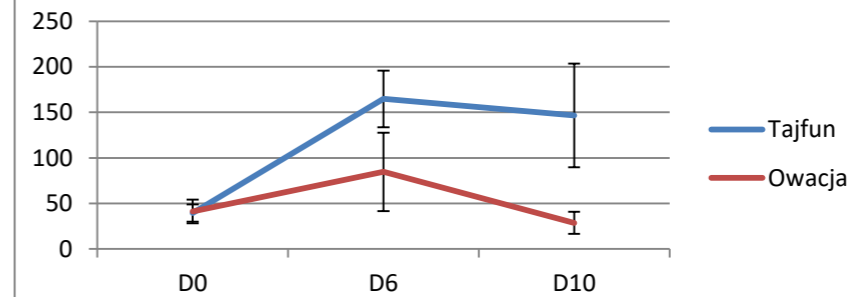

**PGSC0003DMG400006221** 172,67 605,33 1731,33 190,67 899,33 2574,7 18,58 43,1 952 31,9 46,92 100,03

**PGSC0003DMG400006221**

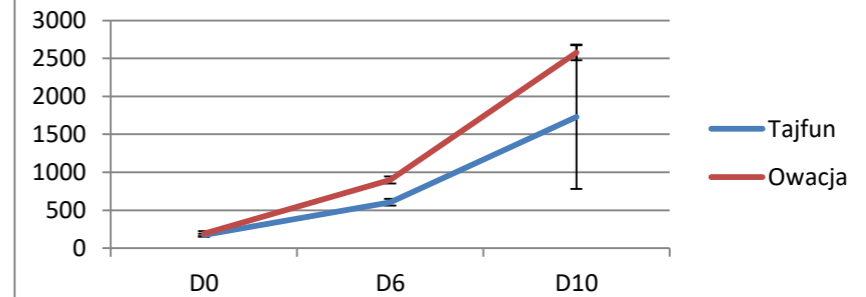

**PGSC0003DMG400006295** 276,67 692 810,67 170,67 427,33 438 28,31 160,34 178,58 72,92 86,03 108,06

**PGSC0003DMG400006295**

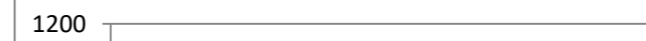

PGSC0003DMG400006555 499,33 902 1030,67 492 1234 1447,3 81 80,52 171,61 228 74 61,33

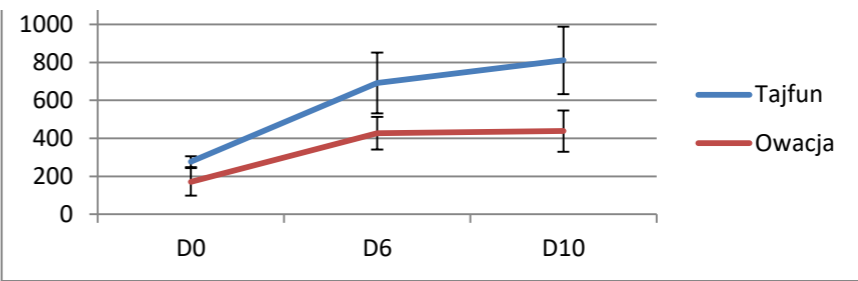

PGSC0003DMG400006555

PGSC0003DMG400006661 9977,33 132489 71940 4808 84990 15554 4493,5 19346 18683 2446,8 30001 3552,95

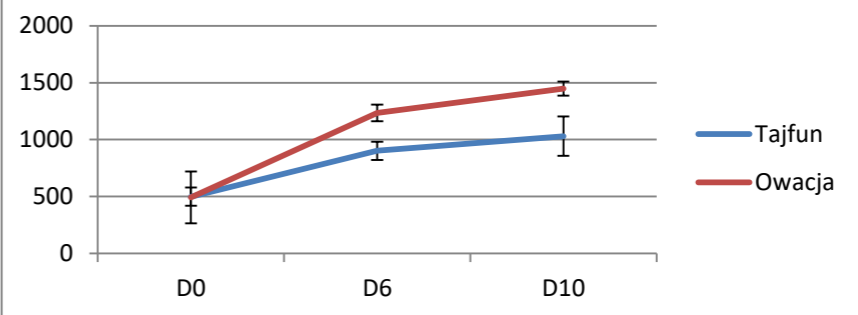

PGSC0003DMG400006661

PGSC0003DMG400006768 3922,33 15150 28235 4427,33 22246 54433 1140,4 2267,6 8845,5 848,22 1518,4 3901,78

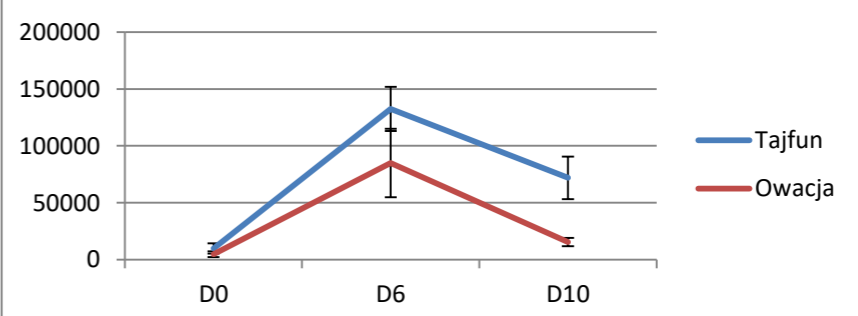

PGSC0003DMG400006768

PGSC0003DMG400006784 537,33 1710,7 1311,33 496,67 1108,7 710,67 179,29 362,6 267,33 202,53 132,08 50,21

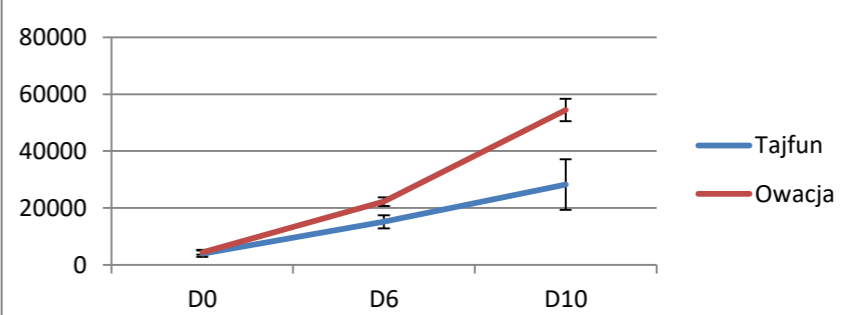

PGSC0003DMG400006784

PGSC0003DMG400007200 1352,67 4693,3 5872,67 1049,33 2567,3 1878,7 775,39 1308,9 1760,3 430,35 926,59 682,17

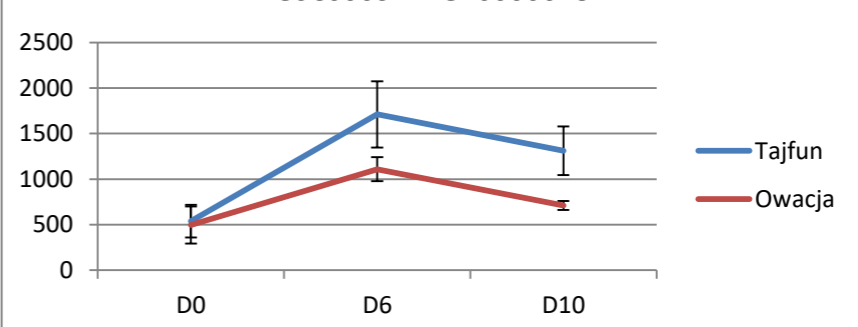

PGSC0003DMG400007200

10000

PGSC0003DMG400007373 876 4504 10660,7 874 6471,3 16332 294,69 951,17 4672,7 135,54 1238,9 1958,12

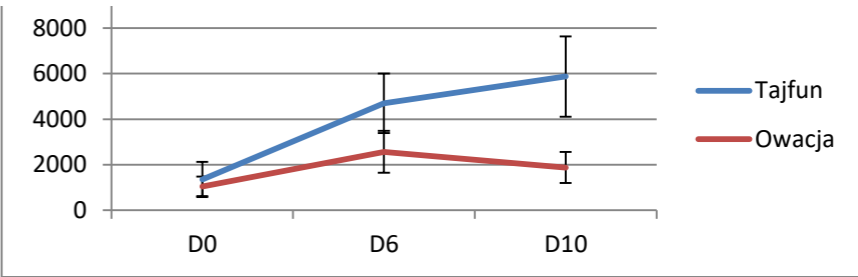

PGSC0003DMG400008148 289,33 10757 4875,33 200,67 7290 1746 101,24 2230 1300,5 20,23 582 463,13

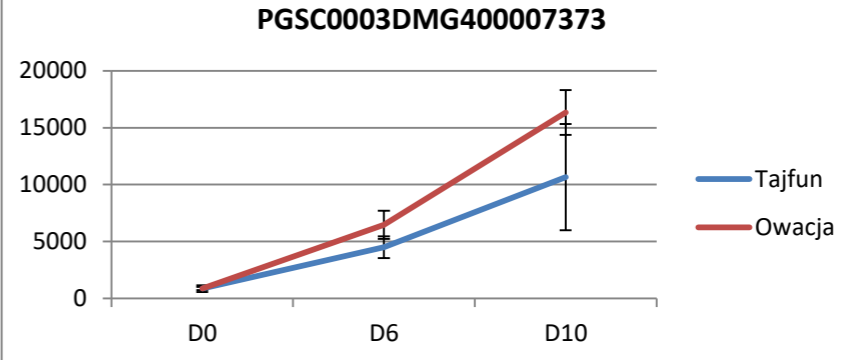

PGSC0003DMG400008176 234 5652,7 3389,33 177,33 4144,7 1208,7 74,65 1047,7 742,18 21,94 327,78 355,18

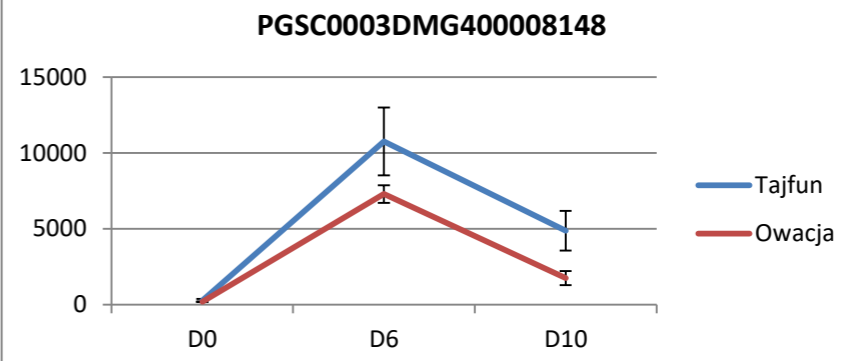

PGSC0003DMG400008348 448 1446 2620,67 334,67 2429,3 3952 40,45 474 1384,8 72,01 252,46 281,57

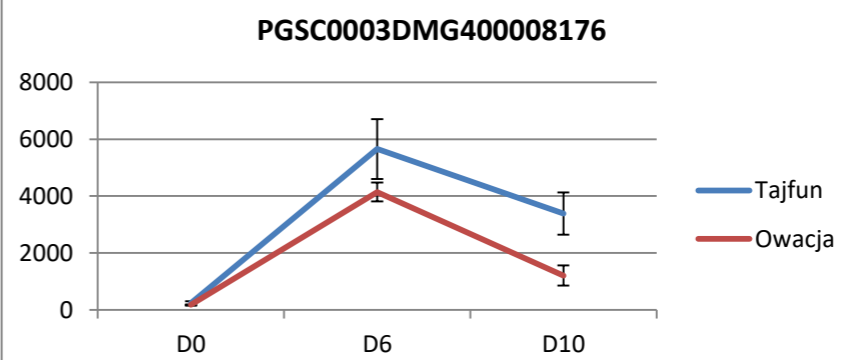

PGSC0003DMG400008434 77,33 290 332,67 34,67 151,33 748,67 18,15 82,49 71,7 30,09 57,87 273

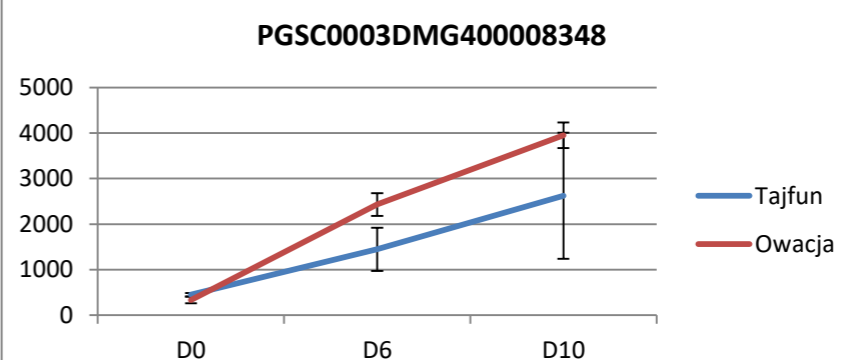

PGSC0003DMG400008434 1200

**PGSC0003DMG400008497** 0,67 485,33 408,67 2 128 27,33 1,15 127,03 346,89 3,46 49,76 18,04

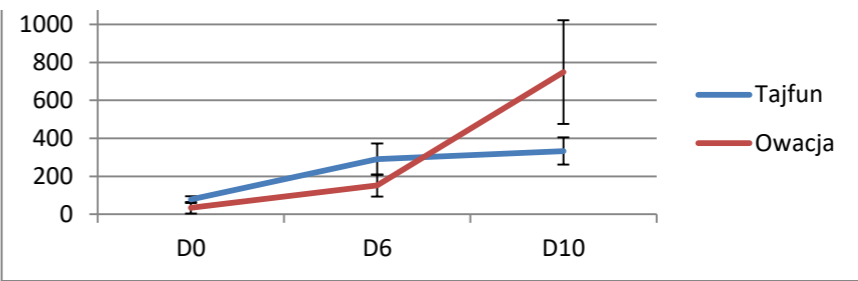

**PGSC0003DMG400008497**

**PGSC0003DMG400008502** 542 1400,7 1071,33 665,33 854,67 623,33 103,13 168,31 284,85 144,46 132,16 42,44

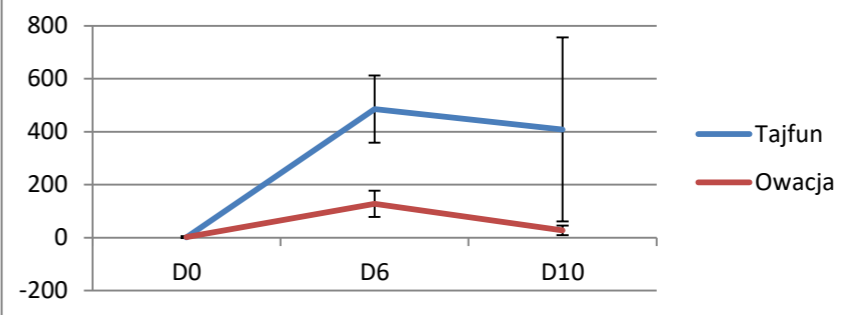

**PGSC0003DMG400008502**

**PGSC0003DMG400008562** 78,67 733,33 907,33 117,33 1416,7 1248 76,14 159,21 271,09 101,93 184,85 139,27

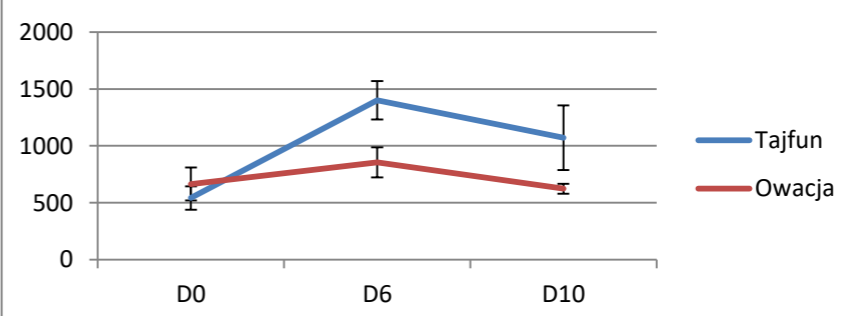

**PGSC0003DMG400008562**

**PGSC0003DMG400008644** 257,33 842 695,33 145,33 504 324,67 108,01 127,67 91,66 59,68 81,68 132,01

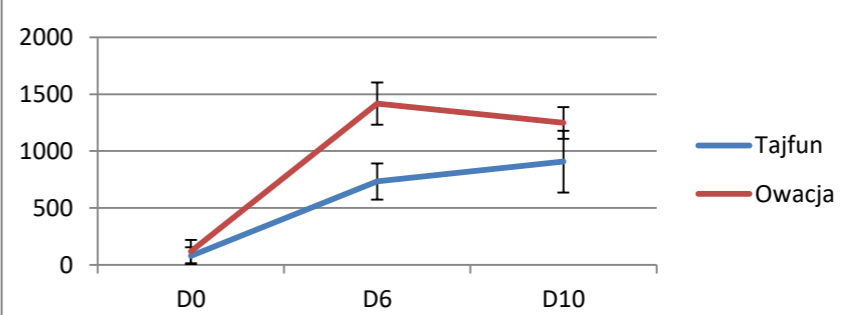

**PGSC0003DMG400008644**

**PGSC0003DMG400009005** 196,67 4315,3 16420 227,33 6504,7 29582 48,88 831,25 7274,7 71,11 363,92 4491,32

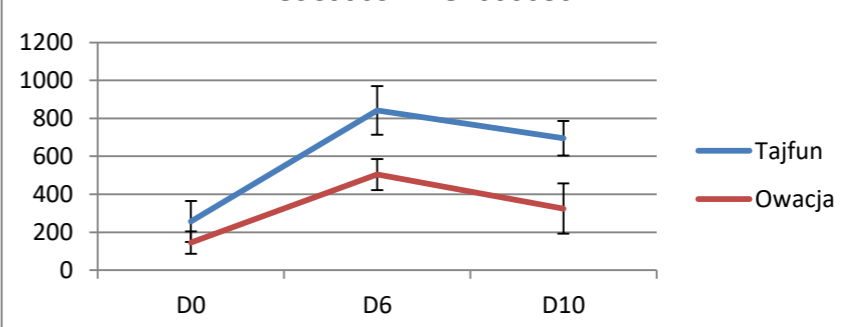

**PGSC0003DMG400009005**

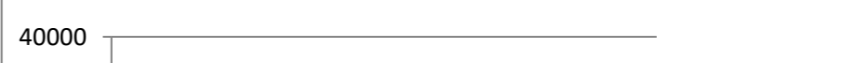

PGSC0003DMG400009095 1800,67 4548 6589,33 1991 8694,3 12729 497,68 1116,7 2647,4 1120,2 1488,9 3253,25

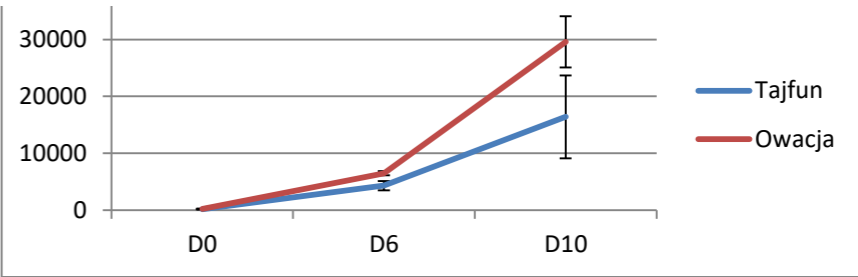

PGSC0003DMG400009095

PGSC0003DMG400009295 2020 3774,7 6670 1673,33 2592 3050 477,52 713,05 357,51 45,71 338,96 822,87

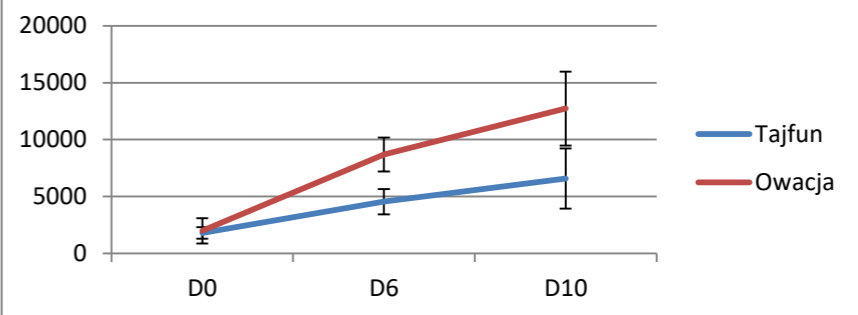

PGSC0003DMG400009295

PGSC0003DMG400009303 135,33 506,67 508,67 114 275,67 288,67 66,52 72,45 66,94 69,31 55,63 28,02

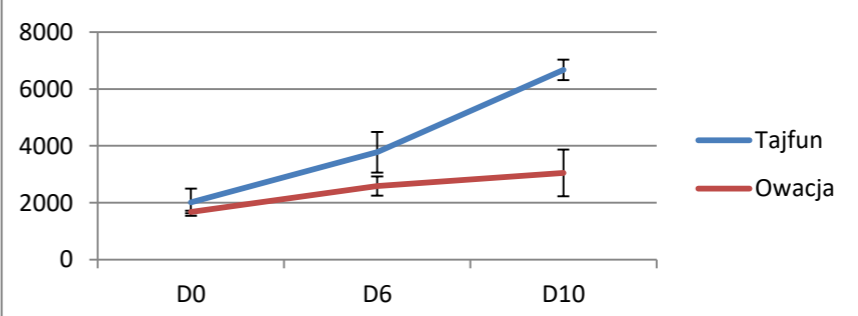

PGSC0003DMG400009303

PGSC0003DMG400009330 33,33 556 1193,33 34,67 326 570,67 57,74 66,3 340,57 60,04 49,52 75,16

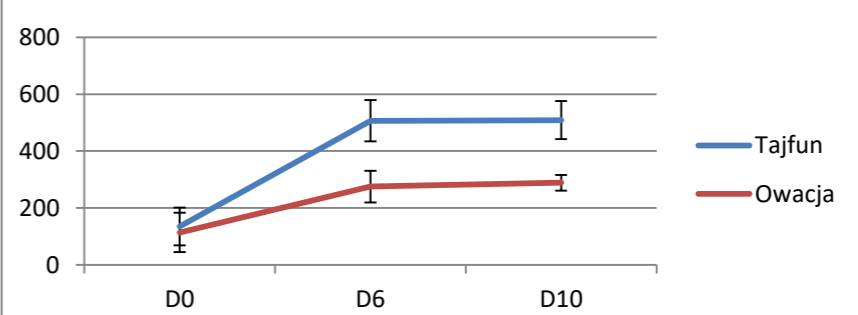

PGSC0003DMG400009330

PGSC0003DMG400009414 3542,67 12581 17913,3 2466 20215 35660 544,71 209,25 4162,1 889,23 1862,2 1897,39

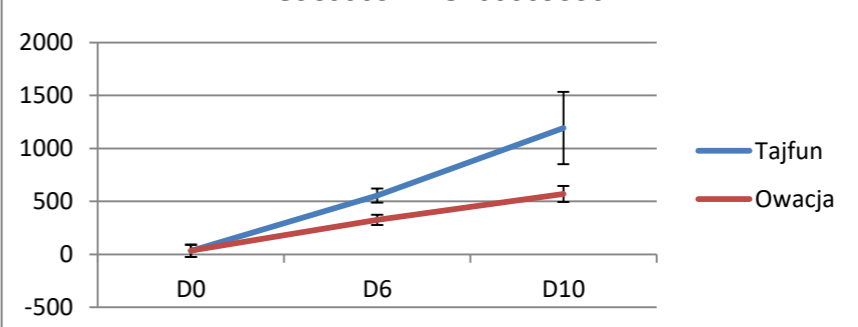

PGSC0003DMG400009414

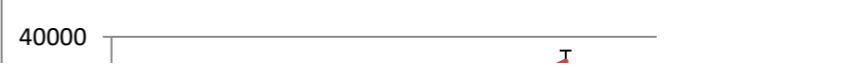

PGSC0003DMG400009473 504 1413,3 1425,33 383,33 929,67 580 154,62 138,4 309,59 107,23 88,36 140,34

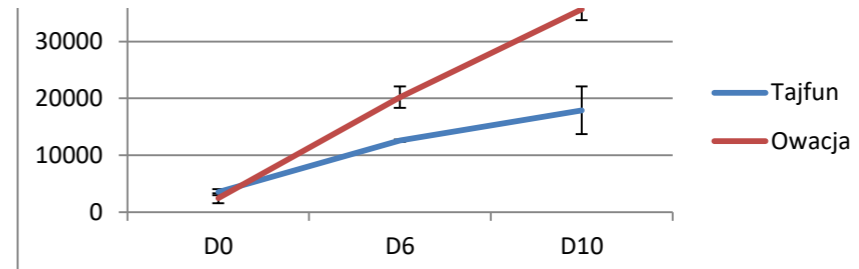

PGSC0003DMG400009473

PGSC0003DMG400009482 578 4080 1300 641 2253,7 341,33 104,89 176,68 413,03 68,24 394,05 69,55

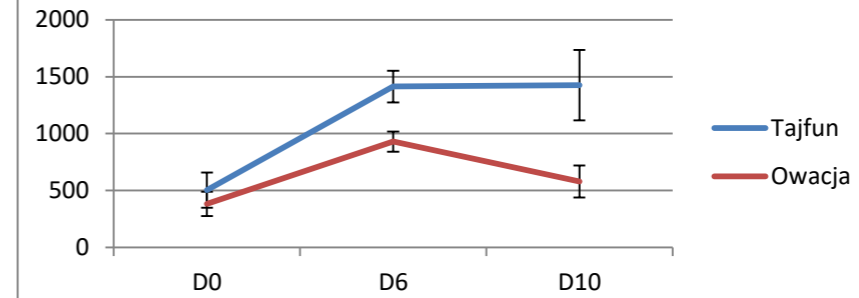

PGSC0003DMG400009482

PGSC0003DMG400009599 5739,33 23041 16062 6896 37891 23287 1102,6 920,44 3189,9 3701,1 1207,7 1601,33

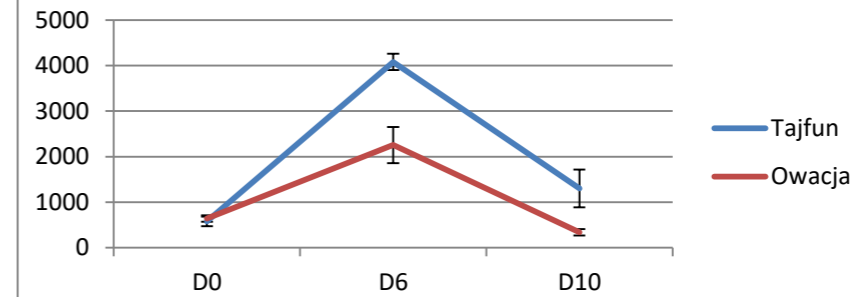

PGSC0003DMG400009599

PGSC0003DMG400009714 179,33 652,67 504 151,33 452,67 288,67 111,79 93 54,15 62,01 129,53 21,2

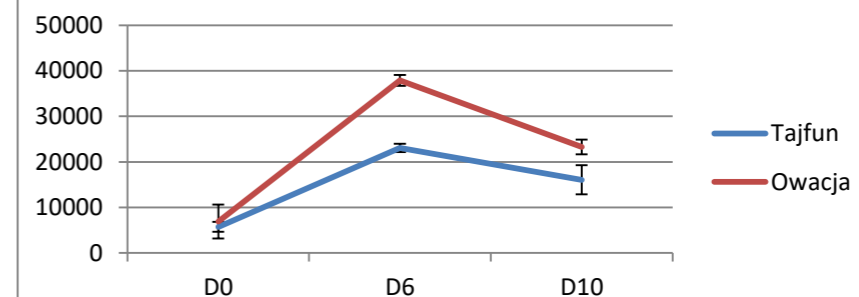

PGSC0003DMG400009714

PGSC0003DMG400009927 102 1577,3 575,33 94 825,33 119,33 88,61 346,84 325,33 84,07 161,71 44,74

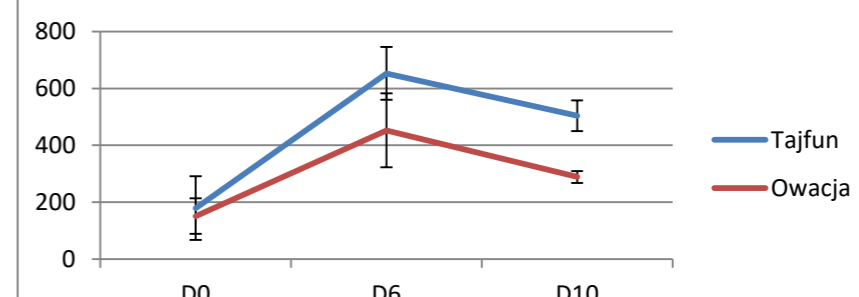

PGSC0003DMG400009927

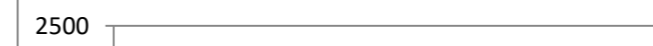

PGSC0003DMG400010172 42 687,33 577,33 20,67 349,33 86 52,12 228,71 46,19 3,06 57,77 27,78

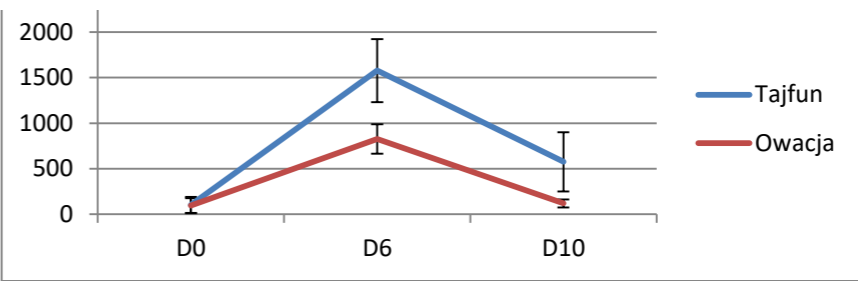

PGSC0003DMG400010207 0,67 247,33 801,33 6 679,33 8586,7 1,15 191,42 1187 5,29 126,24 4809,49

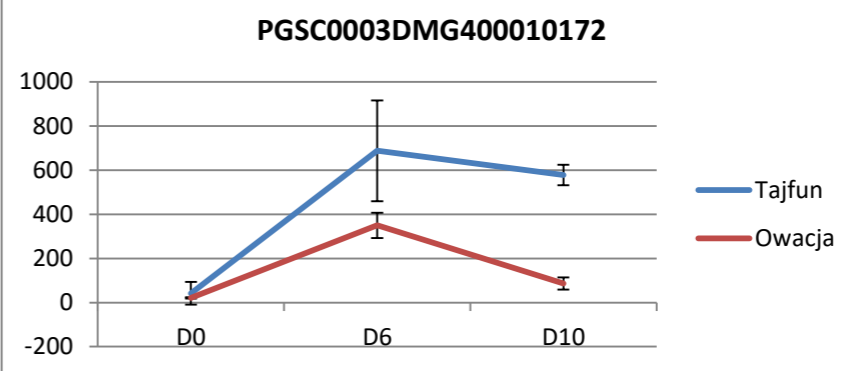

PGSC0003DMG400010270 248 775,33 761,33 142 354 350 58,62 117,17 116,21 52,57 36,39 50

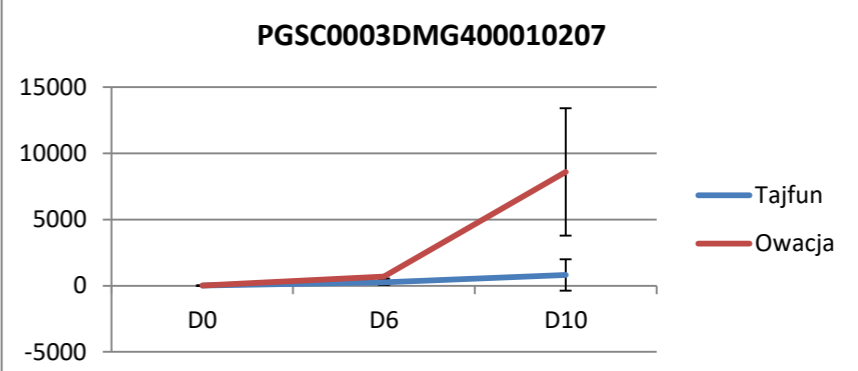

PGSC0003DMG400010318 283,33 1147,3 1021,33 164 820 338 38,85 126,64 61,78 38,16 114,75 136,84

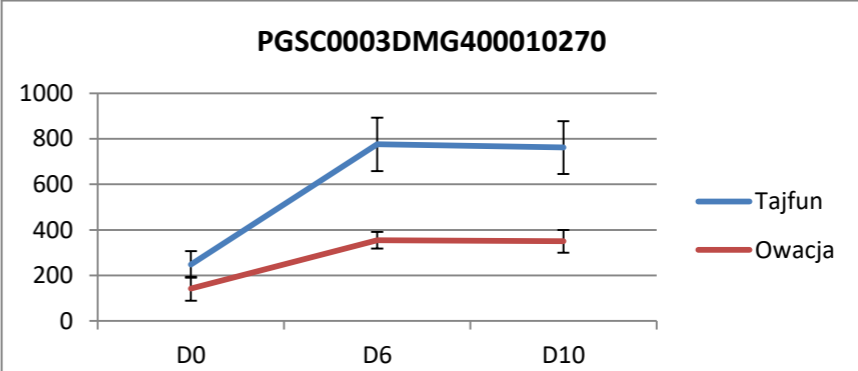

PGSC0003DMG400010498 3,33 90,67 926,67 2 8,67 77,33 1,15 26,1 370,51 3,46 4,16 28,73

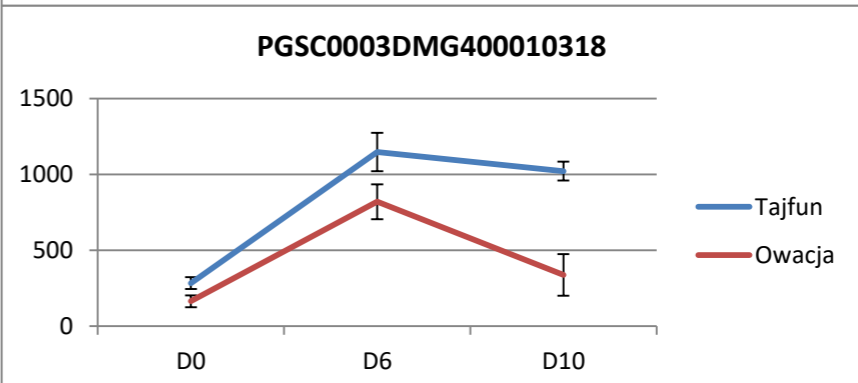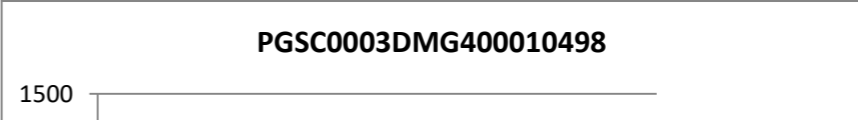



PGSC0003DMG400010622 12,67 390,67 241,33 6,67 137,33 30 16,77 23,86 51,39 3,06 22,3 16,37

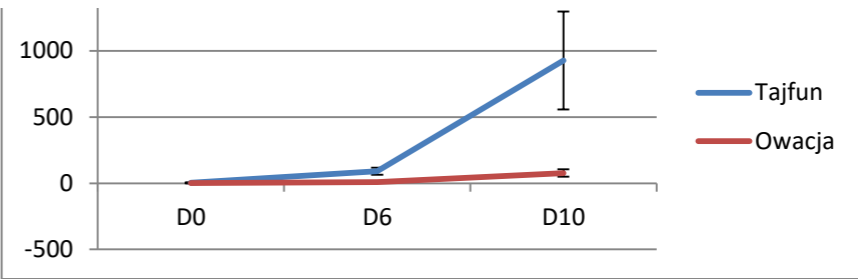

PGSC0003DMG400010622

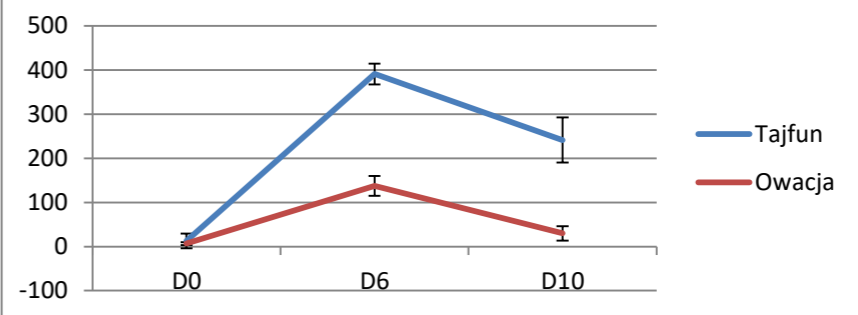

PGSC0003DMG400010698 124 451,33 310 98 235,33 132,67 32,19 90,72 54,99 18,33 21,94 19,43

PGSC0003DMG400010698

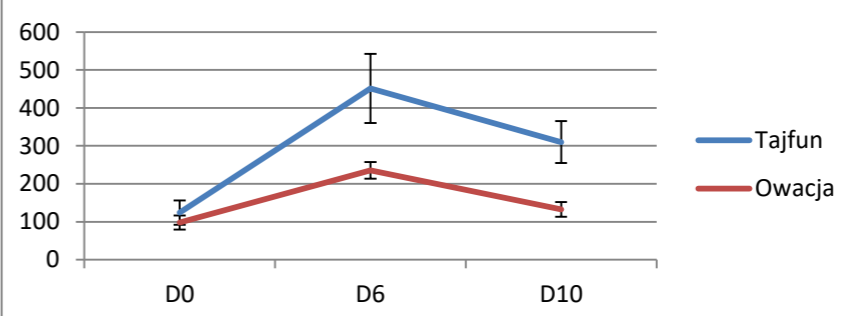

PGSC0003DMG400010751 106,67 290 292,67 66 177,33 122 32,08 65,48 40,07 32,92 27,15 40,15

PGSC0003DMG400010751

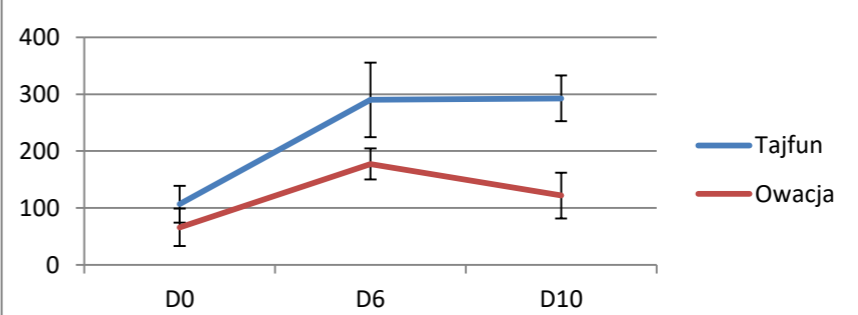

PGSC0003DMG400011394 181 11402 10548,7 136 16565 5192,3 54,74 1190,7 3697 46,86 3098,4 609,57

PGSC0003DMG400011394

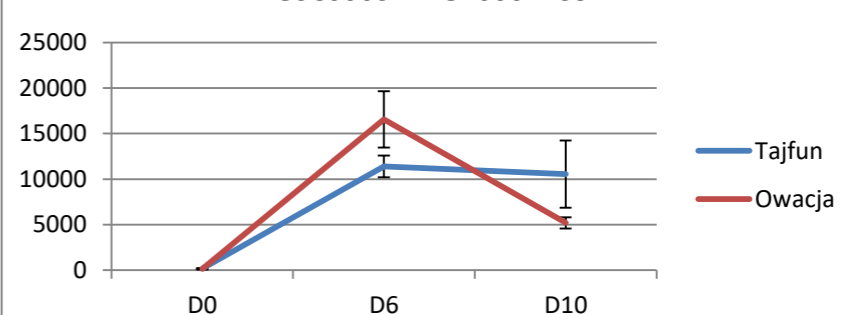

PGSC0003DMG400011570 184,67 652,67 1054,67 104 448,67 611,33 49,08 124,1 211,3 53,33 48,39 35,8

PGSC0003DMG400011570

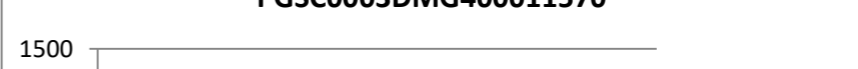

**PGSC0003DMG400011646** 60,67 232,67 256,67 74,67 126 114 13,32 32,08 99,45 24,44 16,37 21,63

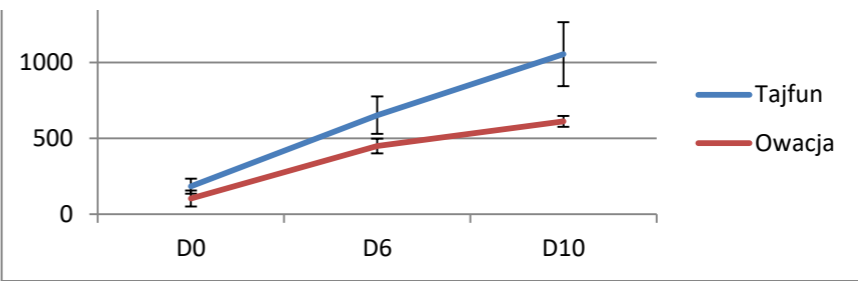

**PGSC0003DMG400011646**

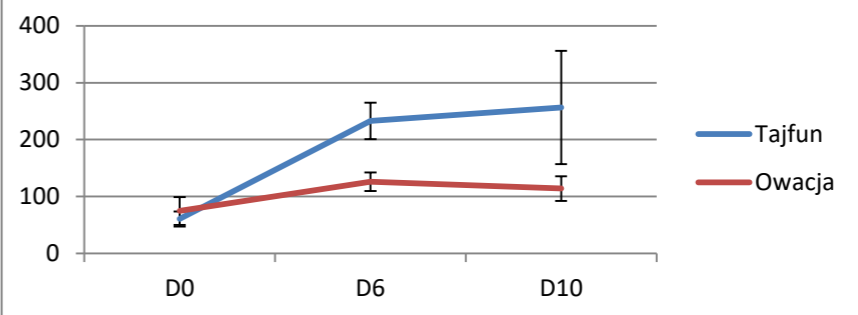

**PGSC0003DMG400011704** 32 292,67 381,33 15,33 157,33 82,67 20 60,18 40,27 8,08 31,64 21,39

**PGSC0003DMG400011704**

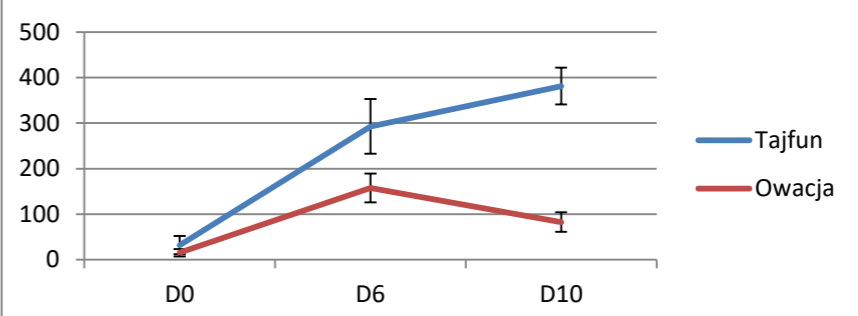

**PGSC0003DMG400011729** 27,33 109,33 699 43,33 206 1441,3 23,86 48,06 740,58 25,32 37,51 212,53

**PGSC0003DMG400011729**

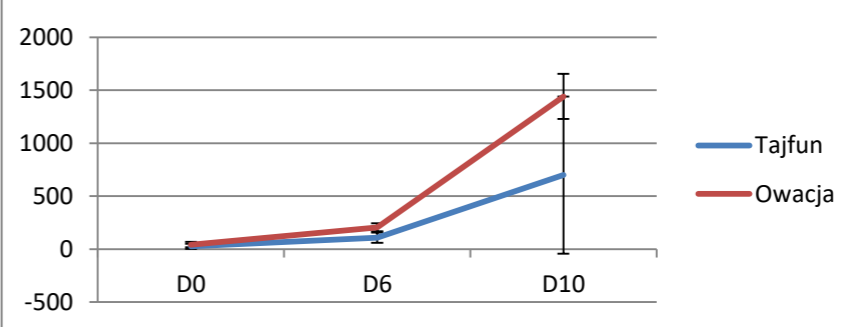

**PGSC0003DMG400011792** 127,33 455,33 375,33 93,33 214 88 12,22 82,37 89,92 36,3 39,04 30

**PGSC0003DMG400011792**

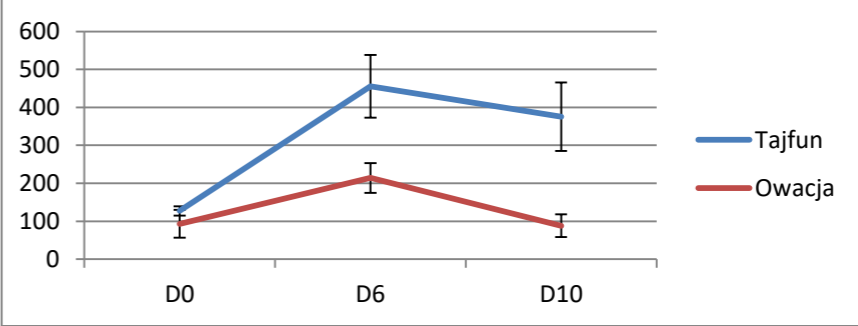

**PGSC0003DMG400011868** 265,33 2096 5808 178,67 2944,7 3255,3 118,01 298,24 680,2 70,01 677,52 806,41

**PGSC0003DMG400011868**

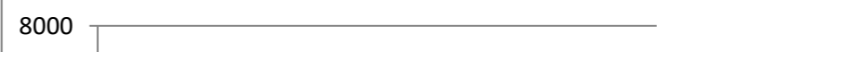

PGSC0003DMG400012213 204,67 541 937 121,67 342 482,67 43,73 52,26 328,86 56,89 96,57 85,32

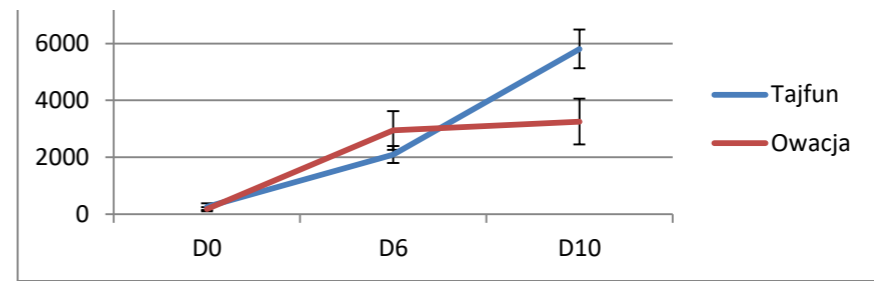

PGSC0003DMG400012213

PGSC0003DMG400012248 63,33 847,33 904,67 80 1404,7 488,67 31,39 73,06 215,54 34,12 109,71 107,43

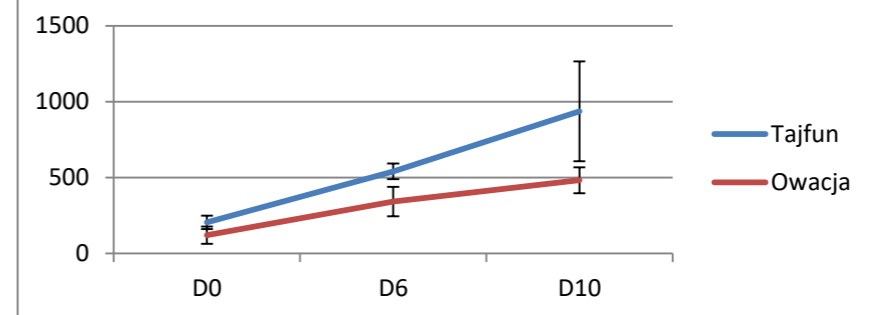

PGSC0003DMG400012248

PGSC0003DMG400012408 530 3274,7 2929,33 454 1747,3 1480,7 231,9 262,12 601,81 136,92 150,76 68,16

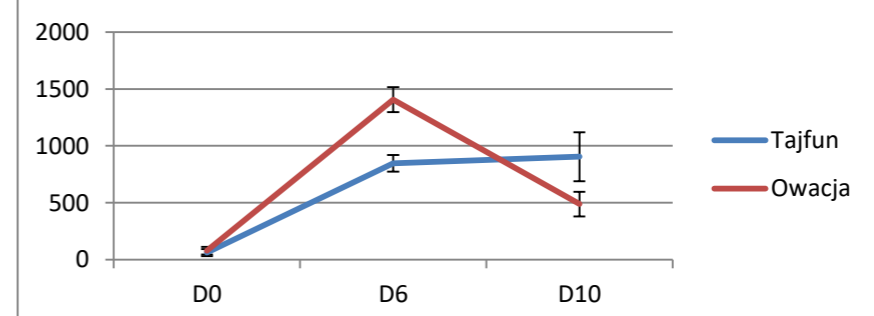

PGSC0003DMG400012408

PGSC0003DMG400012681 1094,33 2740,7 2251,33 753,33 1579,7 1193 225,38 594,51 137,49 337,13 303,98 175,76

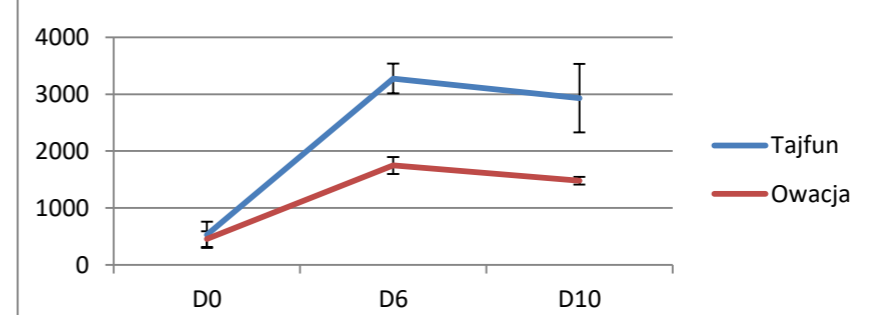

PGSC0003DMG400012681

PGSC0003DMG400012838 332 9884 18098,3 255,67 15027 10659 111,66 2791,5 1709,9 8,14 3226,5 3394,36

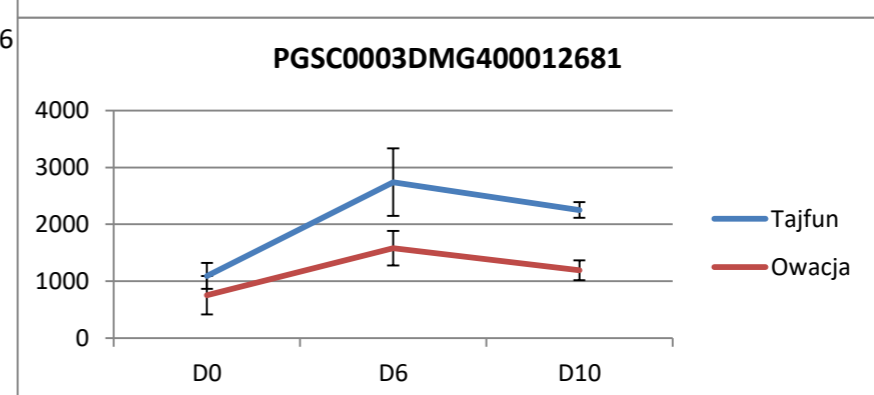

PGSC0003DMG400012838

25000

PGSC0003DMG400013088 1051,33 6133,3 7932,67 861,33 10487 17322 269,05 1198,6 3929,1 305,51 947,75 4585,42

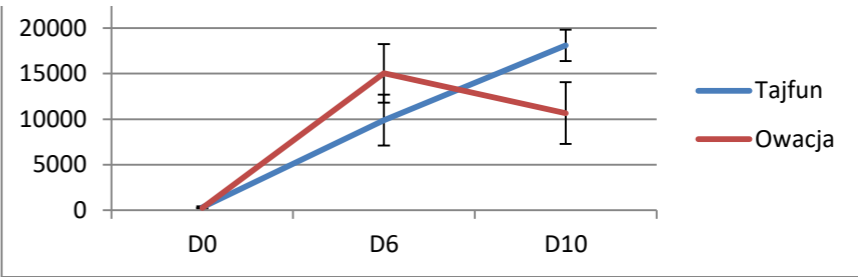

PGSC0003DMG400013088

PGSC0003DMG400013662 310,67 611 780,33 228,67 387,67 364 58,73 51,8 39,37 61,16 60,8 140,33

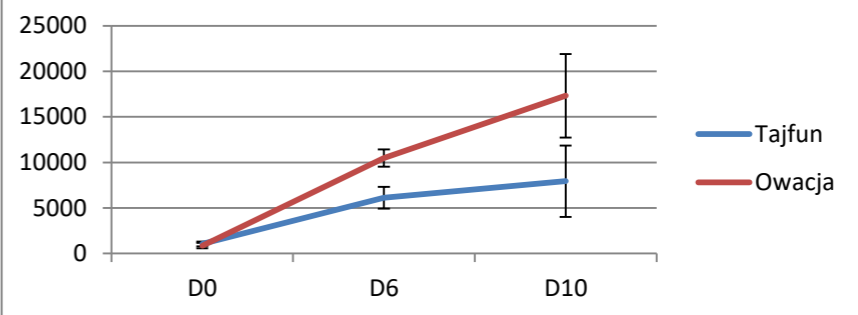

PGSC0003DMG400013662

PGSC0003DMG400013663 126 312,67 277,33 109,33 188 146,67 52,12 101,91 83,34 25,01 42,33 23,18

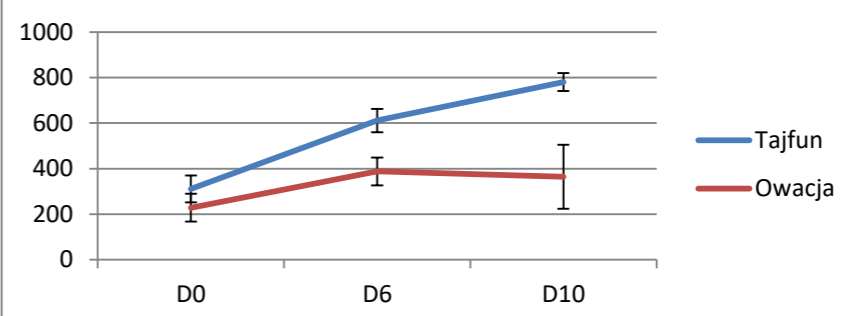

PGSC0003DMG400013663

PGSC0003DMG400013918 308,67 862,67 1076,67 260,67 526,67 442,67 79,25 109,18 79 13,32 88,1 88,37

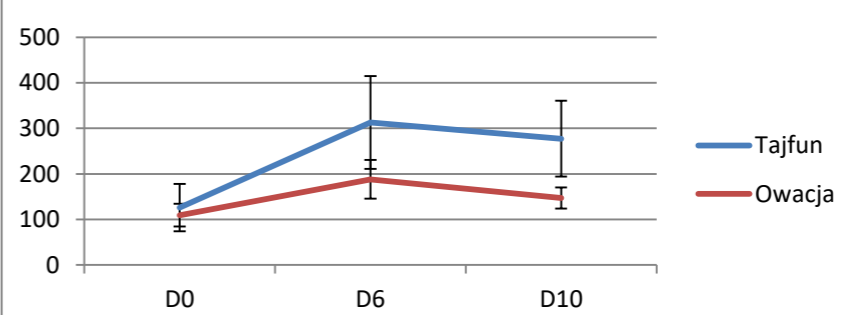

PGSC0003DMG400013918

PGSC0003DMG400014166 1538,67 4914,7 8414,67 1359,33 6798 19017 262,92 295,53 2814 350,69 824,82 1482,27

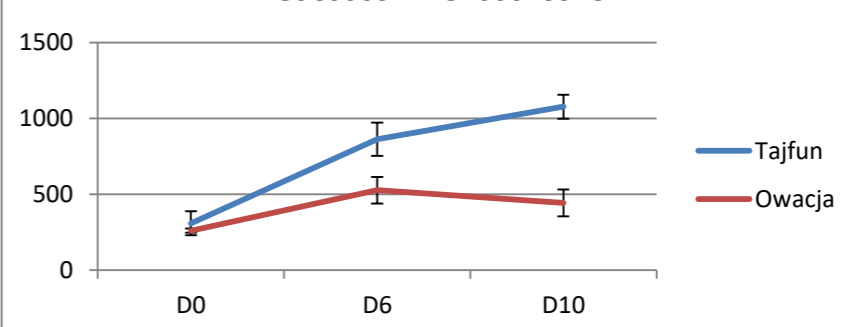

PGSC0003DMG400014166

25000

PGSC0003DMG400014191 1098,67 2000 2432 790,67 1417,3 1134 264,06 275,96 353,21 120,5 162,73 316

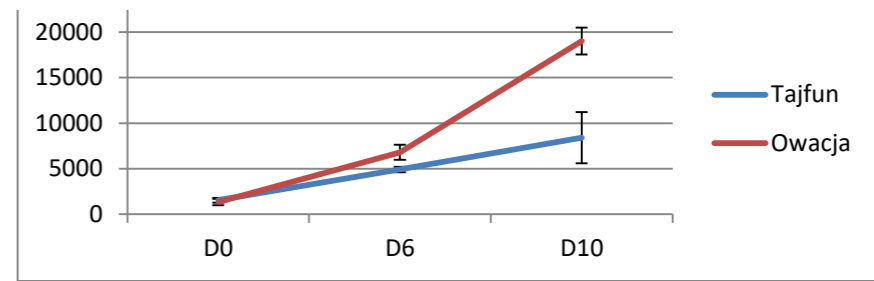

PGSC0003DMG400014191

PGSC0003DMG400014225 7216 22666 37012,7 6162 35648 99227 1352,8 2368 11524 1932 5528,8 2625,38

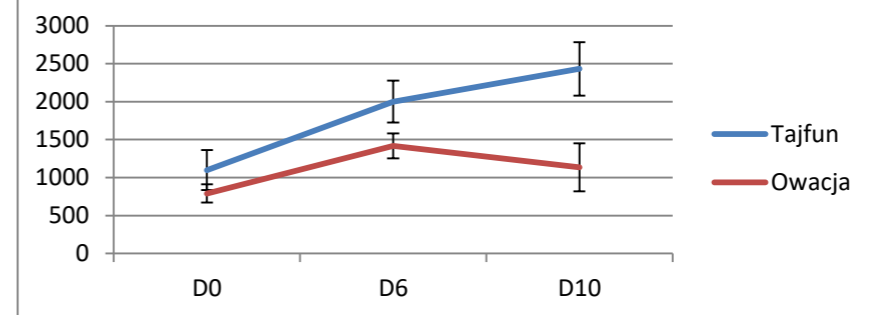

PGSC0003DMG400014225

PGSC0003DMG400014248 3060,67 14861 69237,3 3083,33 42547 141899 622,74 2076,9 23110 663,97 1831,4 19504,9

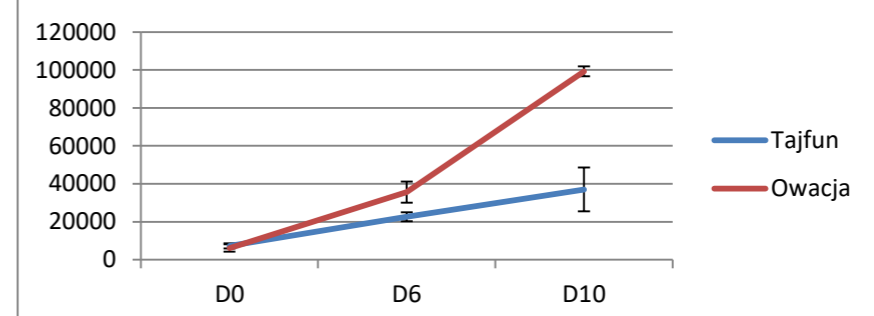

PGSC0003DMG400014248

PGSC0003DMG400014258 28,67 88 186 9,33 34,67 59,33 8,08 12,49 45,83 1,15 10,26 12,86

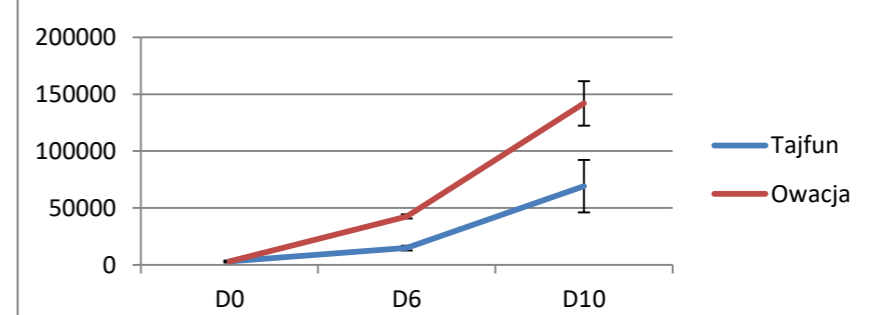

PGSC0003DMG400014258

PGSC0003DMG400014292 345,33 9502 6078 274,67 12348 3576,7 121,73 1116,7 809,07 50,65 1464,7 1078,3

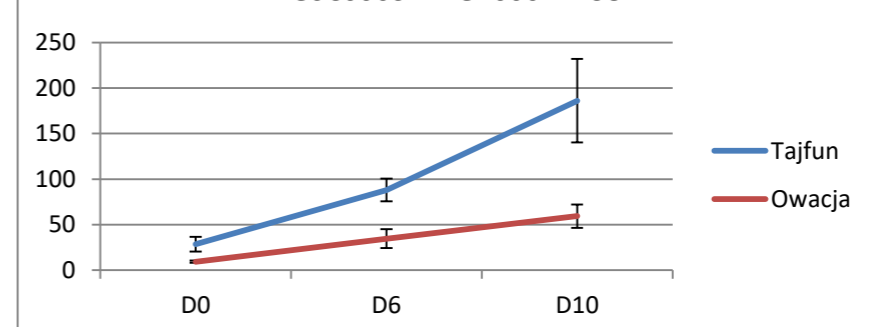

PGSC0003DMG400014292

15000

**PGSC0003DMG400014293** 67,33 49635 13875,3 32,67 32161 4626 50,85 9895,4 1592,6 17,93 2489,7 293,71

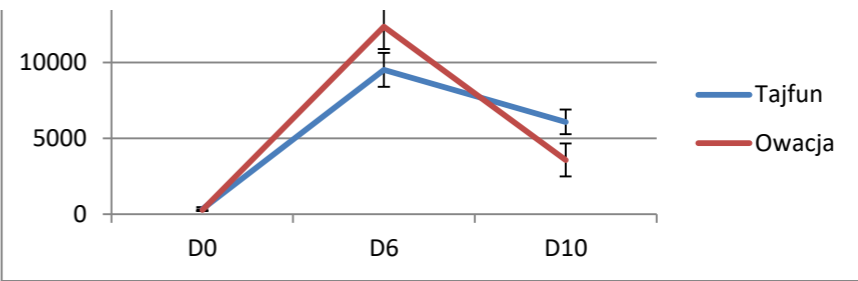

**PGSC0003DMG400014293**

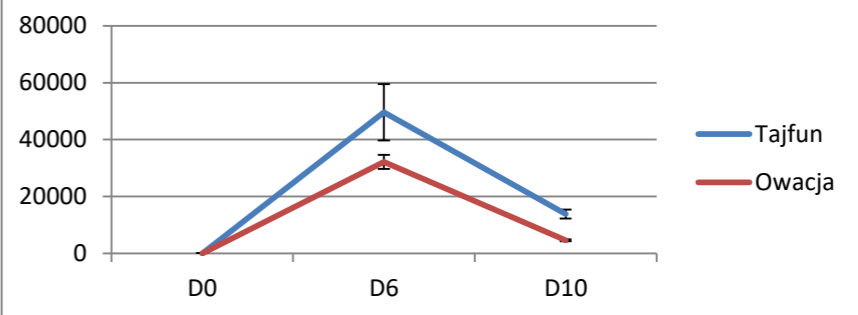

**PGSC0003DMG400014381** 1999,33 4468 4948 1898,67 2999,3 2382 311,06 223 752,52 191,26 104,54 648,06

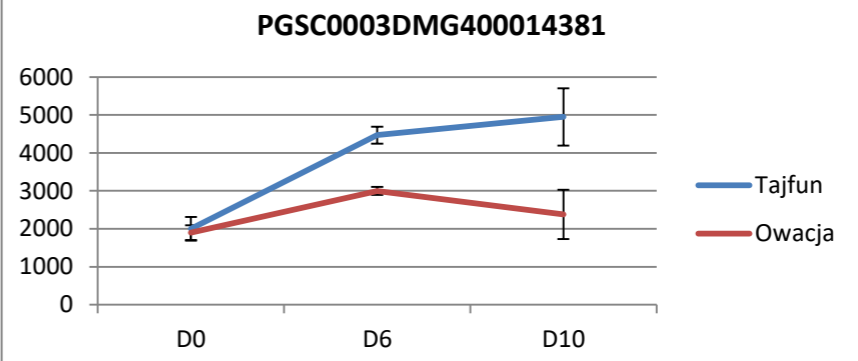

**PGSC0003DMG400014381**

**PGSC0003DMG400014528** 24,67 109,33 112,67 4 46 34,67 19,63 7,02 15,53 5,29 7,21 11,02

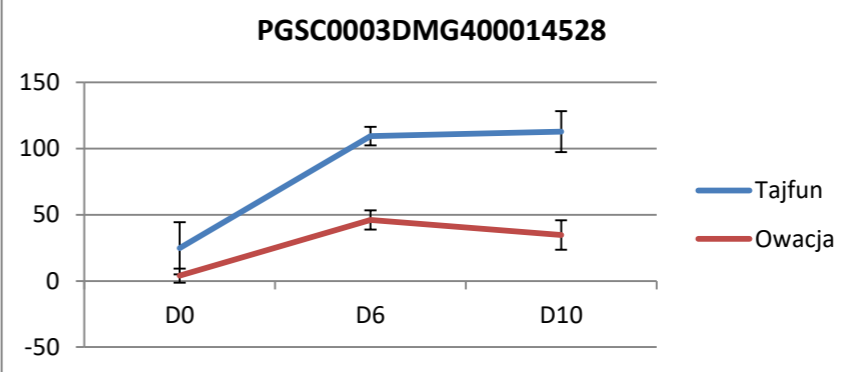

**PGSC0003DMG400014528**

**PGSC0003DMG400014624** 399,33 958 948 346 664,67 458 92,29 134,89 173,22 144,54 70,89 94,3

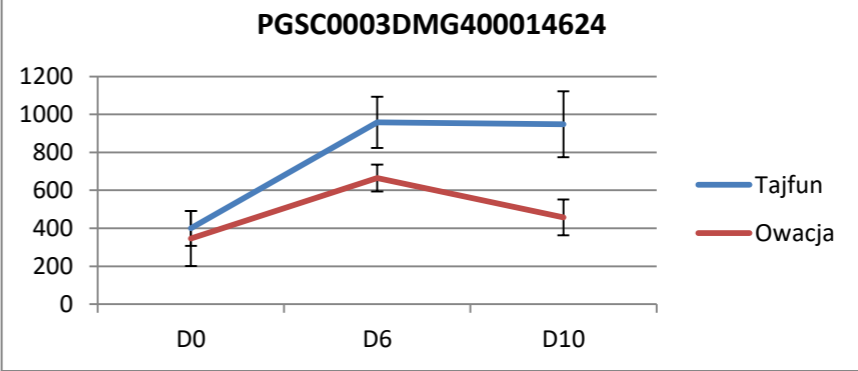

**PGSC0003DMG400014624**

**PGSC0003DMG400015238** 802,67 1902 1586 599,33 1121,3 790,67 179,6 147,5 163,6 53,45 88,01 224,45

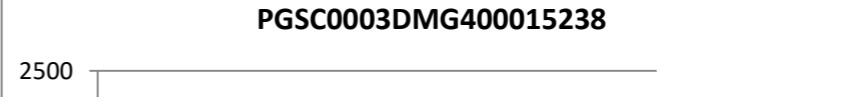

**PGSC0003DMG400015238**

PGSC0003DMG400015263 658,33 3286 3934,33 514 4467,7 8013,3 217,16 619,7 1943 170,04 603,24 941,06

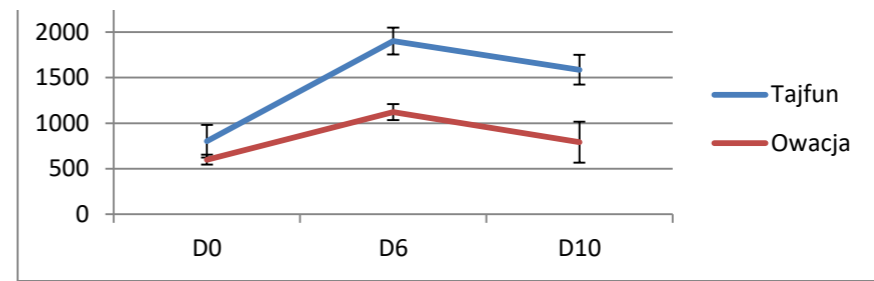

PGSC0003DMG400015263

PGSC0003DMG400015275 0,67 2514,7 3359,33 3,33 1454,7 121,33 1,15 288,86 1186,7 3,06 307,94 41,49

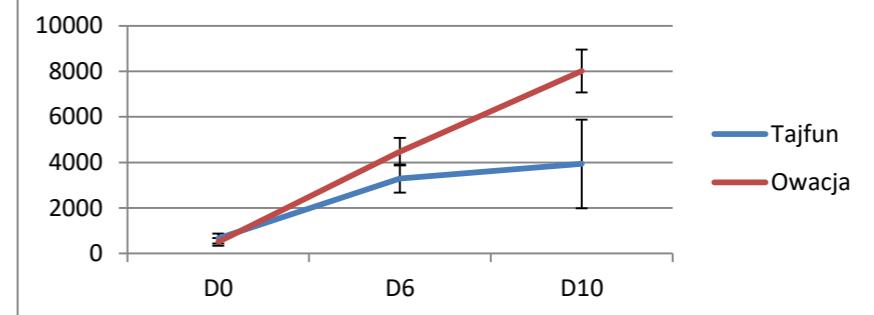

PGSC0003DMG400015275

PGSC0003DMG400015330 757,33 4202,7 11845,3 933,33 8367,3 19579 98,68 489,31 5235,4 160,65 1486,6 854,09

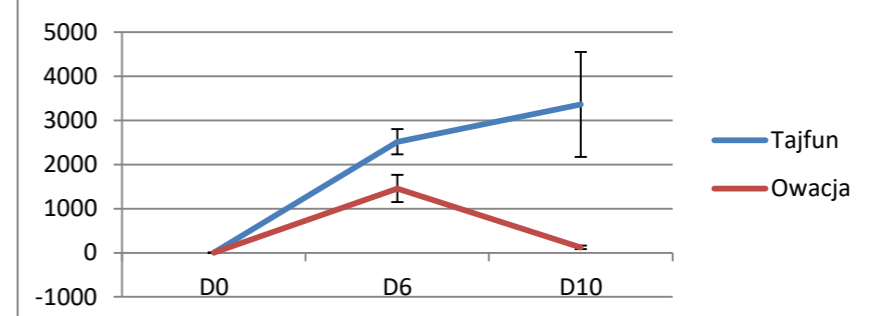

PGSC0003DMG400015330

PGSC0003DMG400015358 338 743,33 1266 315,33 475,33 550,67 80,3 153,74 556,57 20,82 130,24 100,41

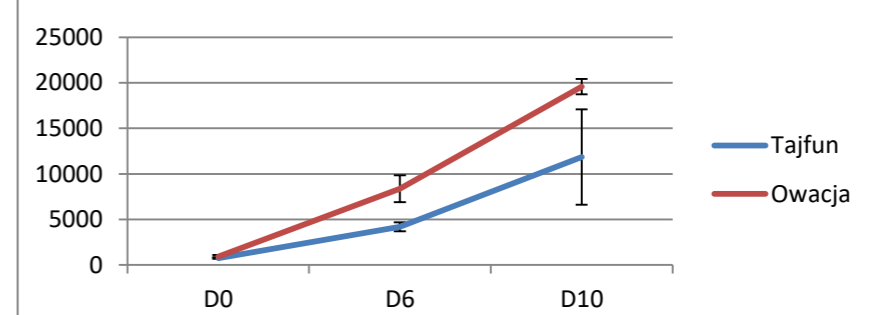

PGSC0003DMG400015358

PGSC0003DMG400015364 24097,3 59476 52239,3 14438 35301 15497 7693,5 3923,2 16582 2589,6 5127,9 819,71

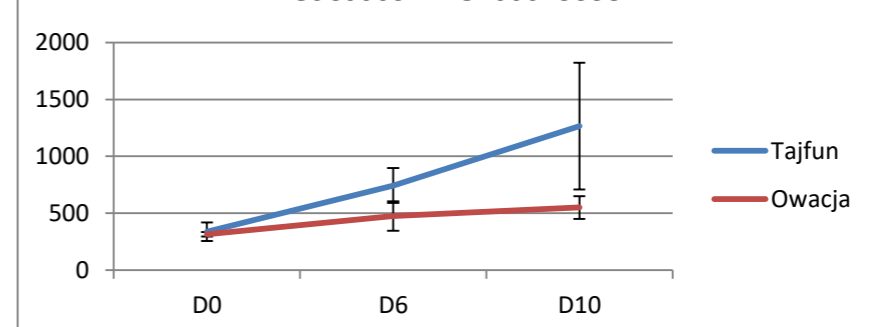

PGSC0003DMG400015364

80000

PGSC0003DMG400015367 495,33 1195,3 1268 436 612 474 37,81 37,81 76,63 126,76 99,02 40,84

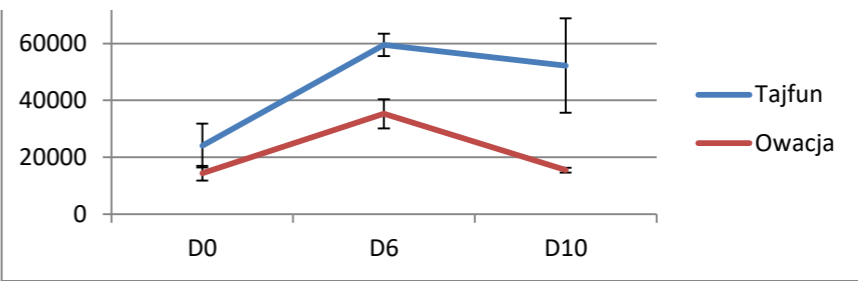

PGSC0003DMG400015367

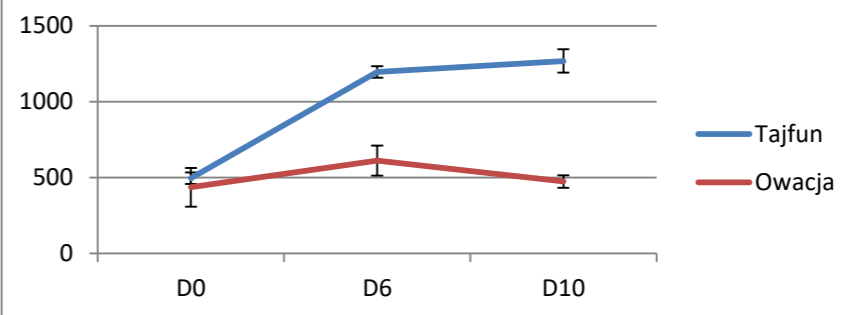

PGSC0003DMG400015406 7039,33 14169 14820,7 6853,33 9422,7 8201,3 1013,3 846,51 2159,7 806,04 978,68 1084,21

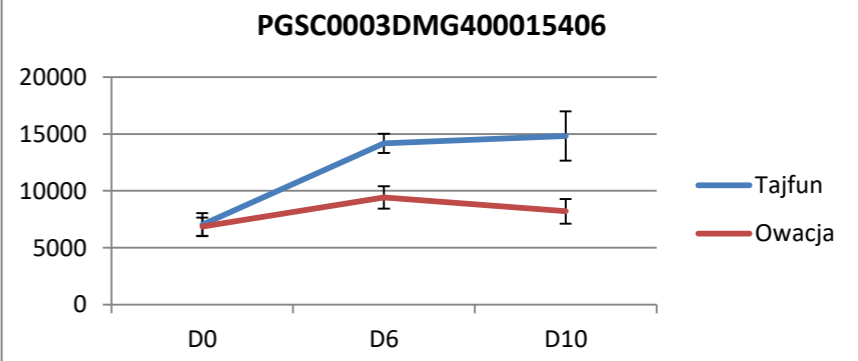

PGSC0003DMG400015406

PGSC0003DMG400015407 98 462,67 436 120 297,33 217,33 85,35 40,02 92,59 55,46 57,98 58,05

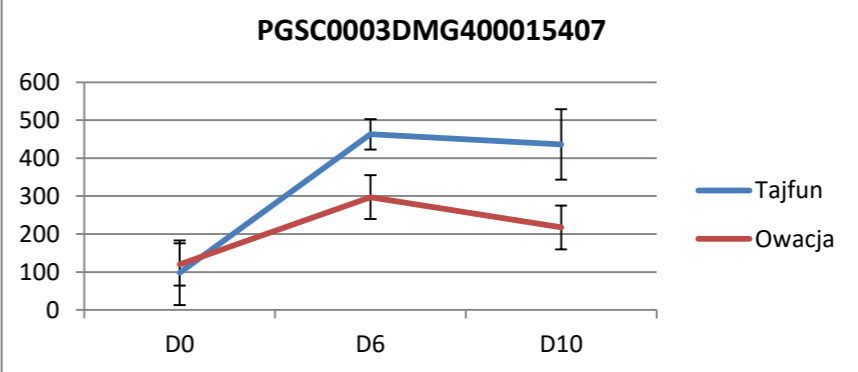

PGSC0003DMG400015407

PGSC0003DMG400015754 2329,33 6394 4392 2159,33 4142 2175,3 842,15 472,83 281,25 293,91 1127,5 418,08

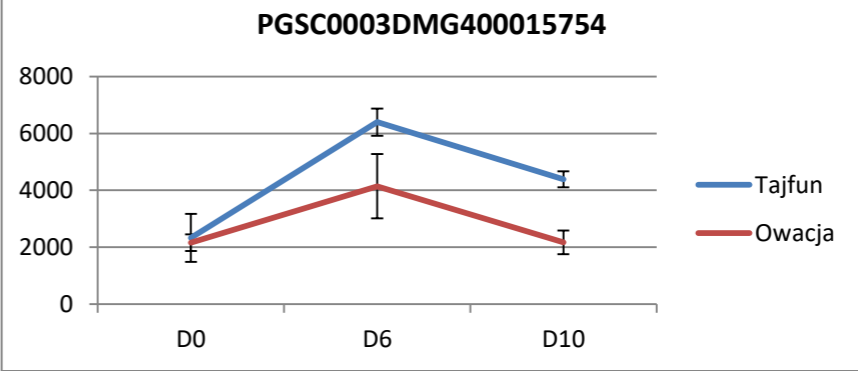

PGSC0003DMG400015754

PGSC0003DMG400015992 4319,33 7384,7 11068 5185,33 5277,3 5879,3 749,29 471,57 2424,1 1491,6 193,87 769,56

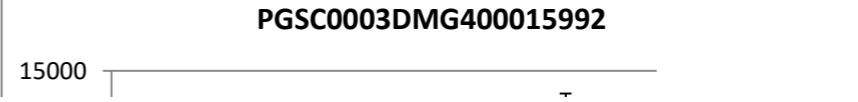

PGSC0003DMG400015992



PGSC0003DMG400016223 64 191,33 200,67 31,33 80,67 77,33 34,7 37,11 68,86 14,47 37,17 27,15

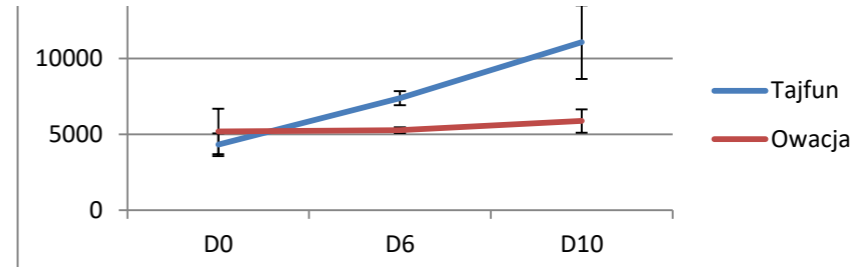

PGSC0003DMG400016223

PGSC0003DMG400016518 72,67 520 1010,67 0 108 158 125,86 69,54 338,24 0 36,5 40,6

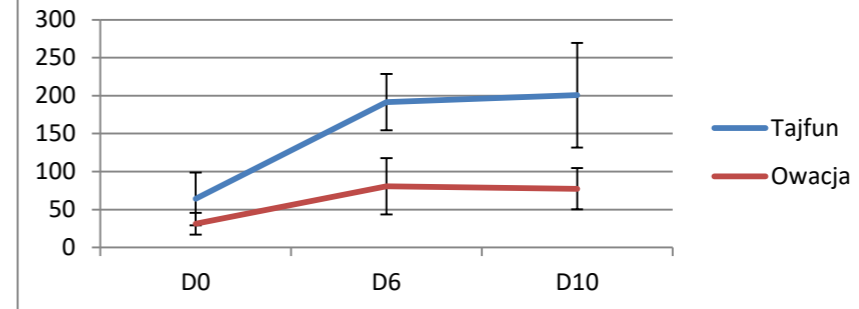

PGSC0003DMG400016518

PGSC0003DMG400016535 106,67 3472 3044 66,67 4937,3 4144 30,55 823,96 604,41 27,3 836,8 425,13

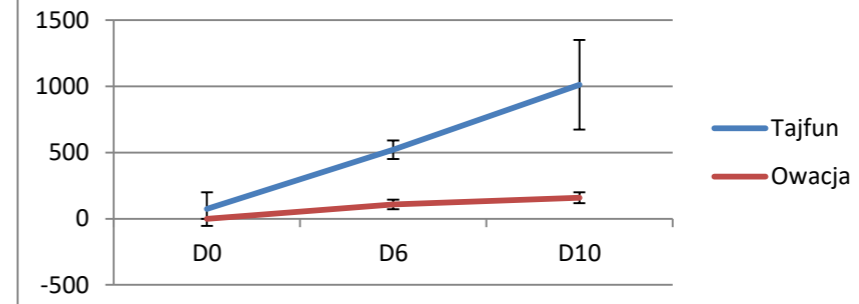

PGSC0003DMG400016535

PGSC0003DMG400016548 120,67 291,33 844,67 142,67 569,33 470,67 55,08 80,03 169,17 44,56 154,3 216,37

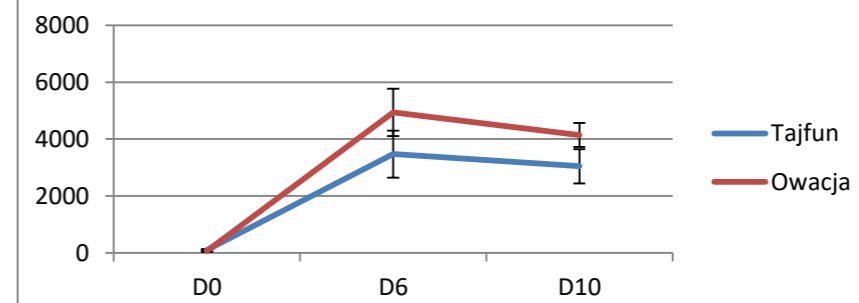

PGSC0003DMG400016548

PGSC0003DMG400017207 115,33 326 370 127,33 206,33 146,67 56,9 71,58 72,99 55,15 21,59 48,18

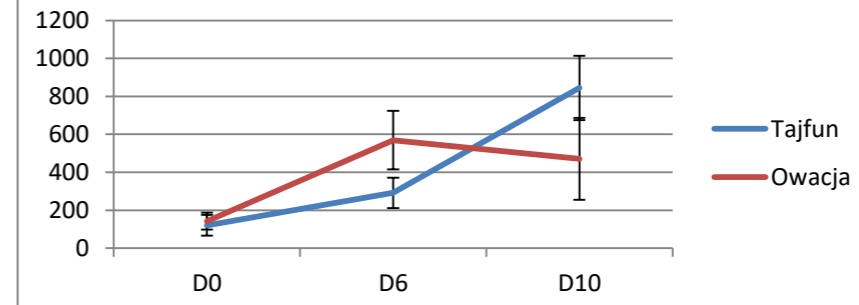

PGSC0003DMG400017207

500

PGSC0003DMG400017714 4254 15363 10545,3 3424 10195 4658 1136,9 1122,4 1885 295,41 1801,9 876,17

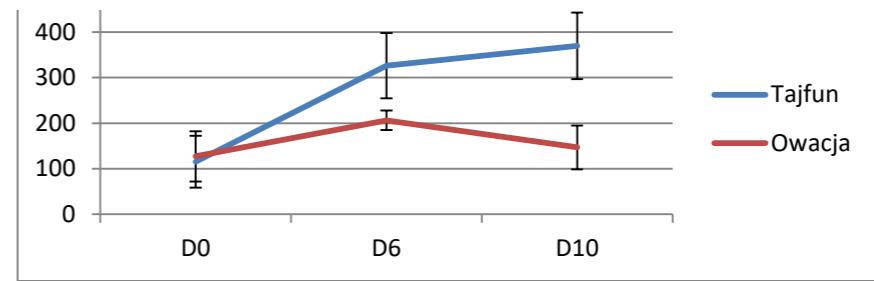

PGSC0003DMG400017714

PGSC0003DMG400017730 242 11953 30262 134,67 7121,3 7660,7 12 2279,4 12370 79,86 1989,9 558,5

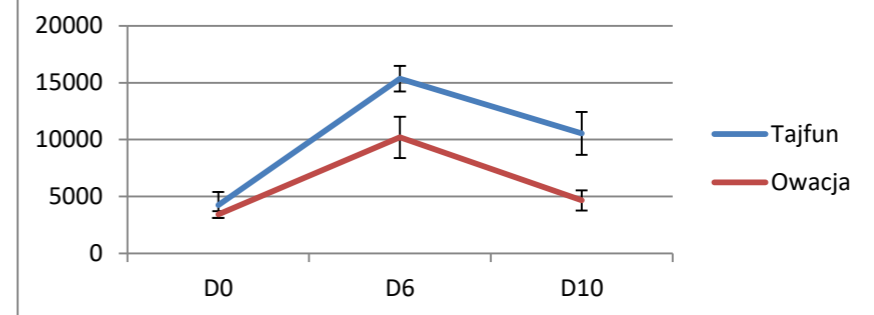

PGSC0003DMG400017730

PGSC0003DMG400017933 8034 17346 17232 7575,33 9317,3 7007,3 2114,4 1501,2 2526,8 891,55 2267,5 871,58

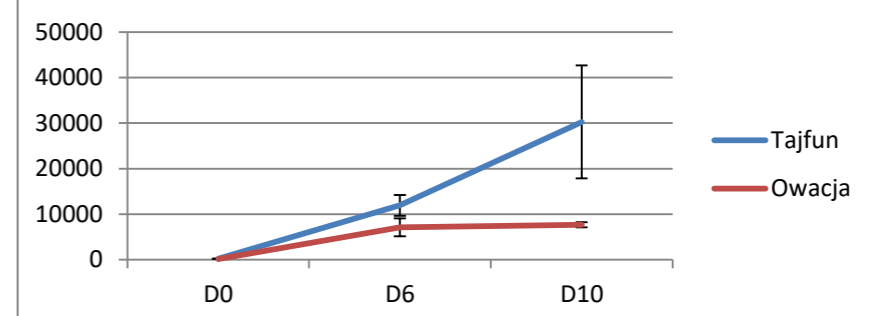

PGSC0003DMG400017933

PGSC0003DMG400018096 269,33 874,67 784,67 190,67 406,67 277,33 93,43 146,29 79,76 31,01 64,04 34,78

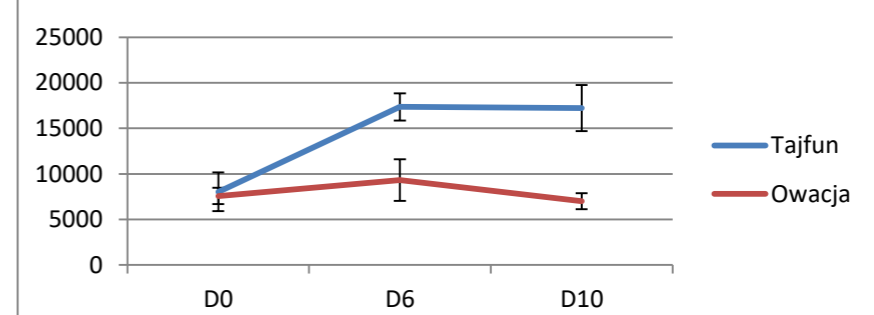

PGSC0003DMG400018096

PGSC0003DMG400018107 301,33 1154 661,33 216,67 558,67 232,67 81,1 143,68 164,25 25,48 51,78 21,2

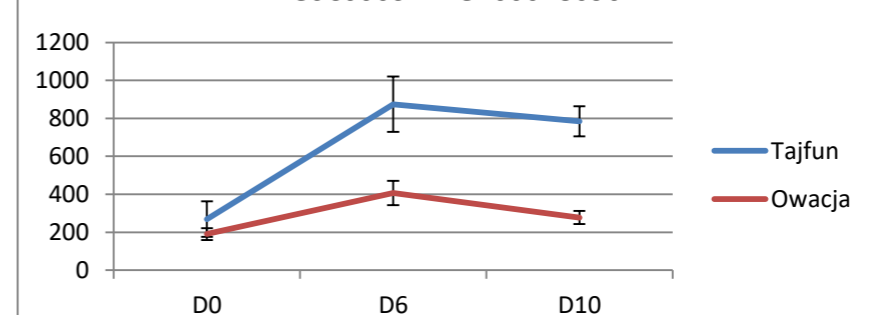

PGSC0003DMG400018107

1500

PGSC0003DMG400018172 179,33 486,67 641,33 111,33 270,67 262 111,16 150,36 125,07 61,07 31,77 71,36

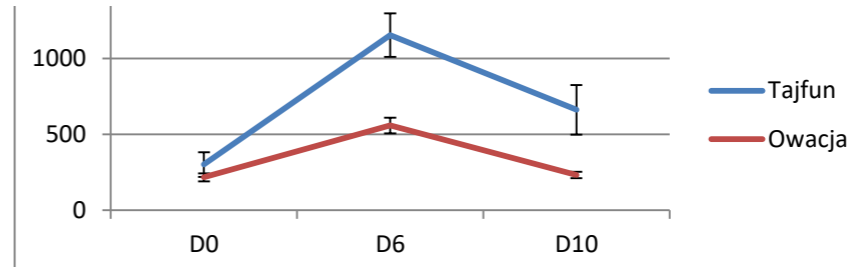

PGSC0003DMG400018172

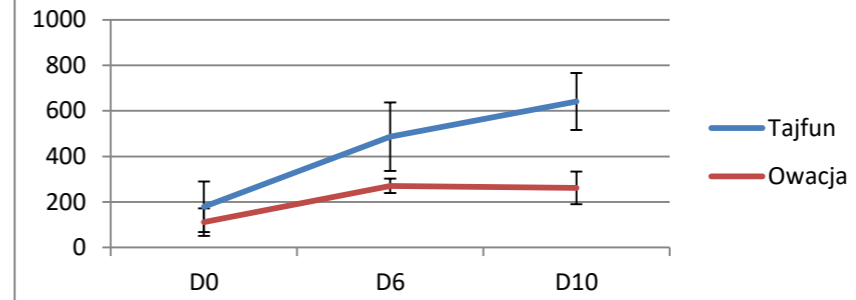

PGSC0003DMG400018236

PGSC0003DMG400018236 2407 7359,3 9803,67 1968 11082 14002 550,79 592,34 2838,8 596,91 338,6 1160,77

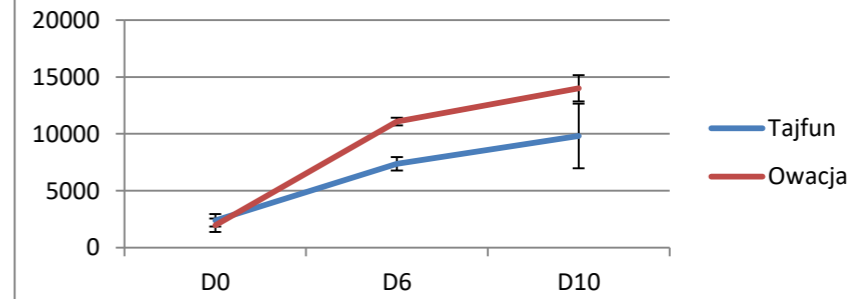

PGSC0003DMG400018670

PGSC0003DMG400018670 549,33 1536 1440 315,33 2221,3 2186 166,3 304,41 638,44 131,15 314 250,1

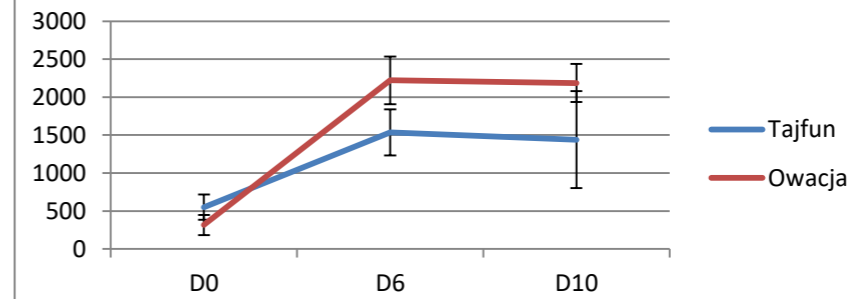

PGSC0003DMG400018964

PGSC0003DMG400018964 1488,67 4097,3 5137,33 1154 2590,7 2714,7 567,05 1040 728,49 217,15 607,62 840,15

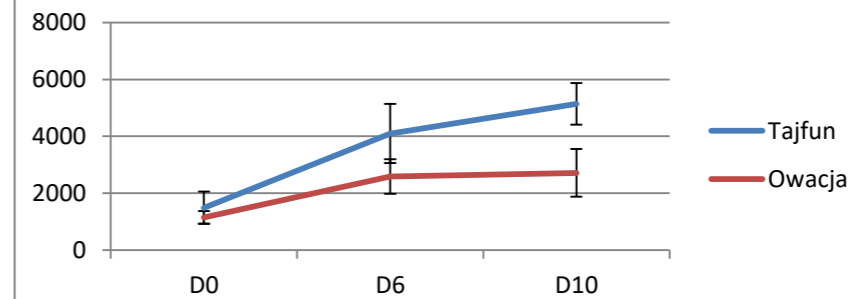

PGSC0003DMG400019077

PGSC0003DMG400019077 2742,67 6240 5746,67 5222 13117 14631 611,57 545,86 875,92 3052,9 1141,2 1523,15

20000

**PGSC0003DMG400019233** 187,33 962 1014 191,33 363,33 151,33 122,81 150,21 93,74 37,17 60,08 61,85

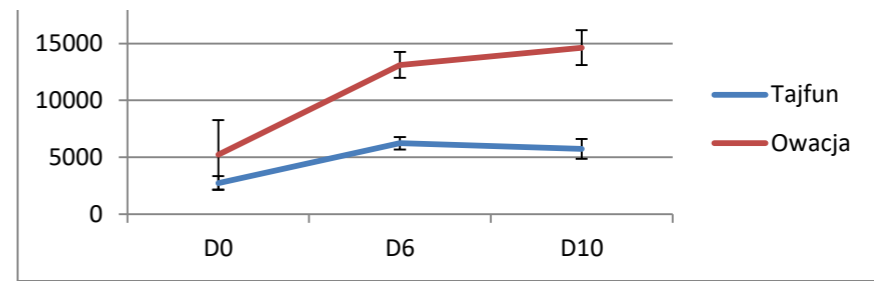

**PGSC0003DMG400019270** 1427,33 6622 4271,33 926,67 2729,3 542 400,25 1329,4 525,63 204 227,39 74,08

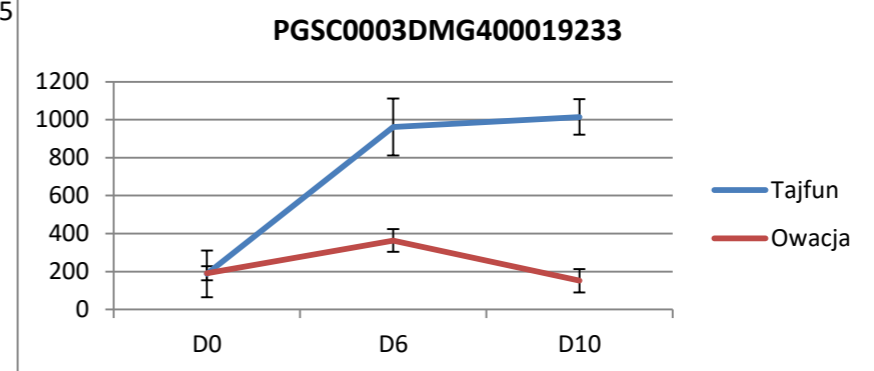

**PGSC0003DMG400019288** 1168,67 8676 6446 787,33 6403,3 2226,7 254,01 431,18 1002,2 240,47 84,13 191,69

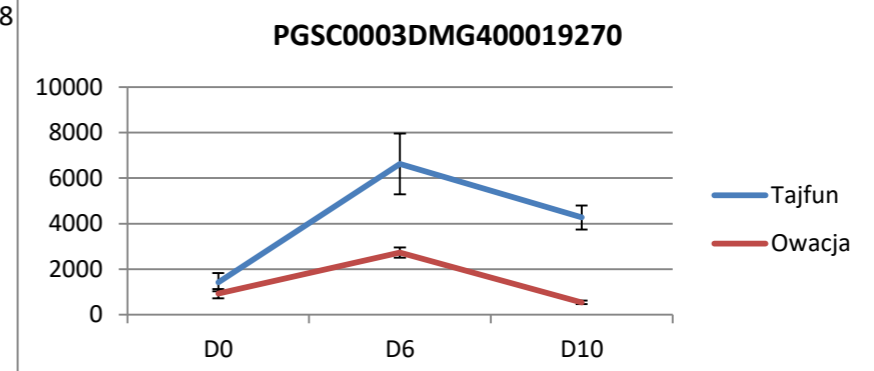

**PGSC0003DMG400019315** 1128,33 8415,3 10216,3 740 12724 25663 372,69 361,63 5323,4 415,12 2080,3 3551,3

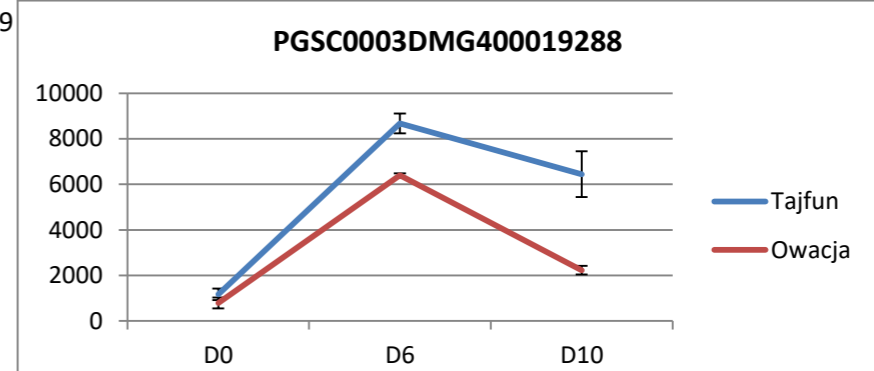

**PGSC0003DMG400019604** 69,67 1163,3 980 105,33 2846,7 2168,3 48 170,46 232,31 25,17 636,52 932,55

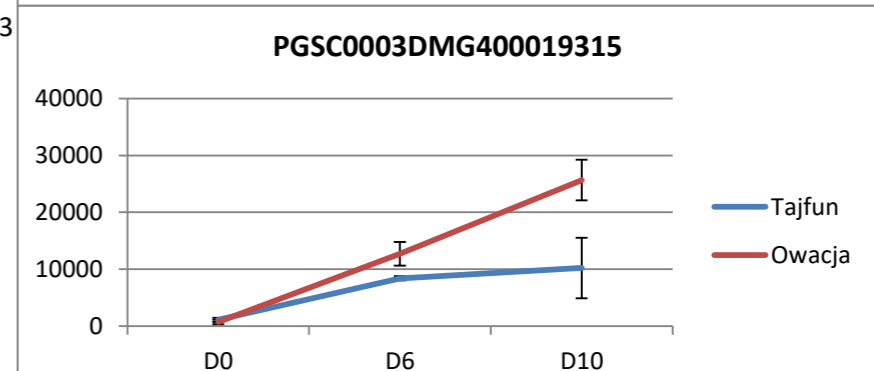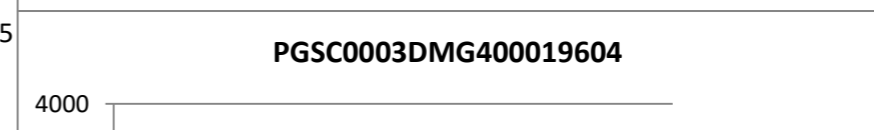

PGSC0003DMG400019829 178,67 574,67 642,67 126,67 364,67 170,67 170,66 43,47 39,11 32,02 44,56 58,97

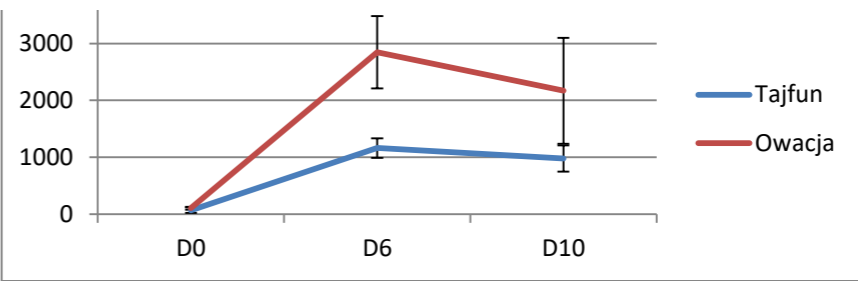

PGSC0003DMG400019829

PGSC0003DMG400019944 230,67 967,33 10494,7 218 1618 24209 84,67 62,36 9816,4 81,46 143,09 5123,49

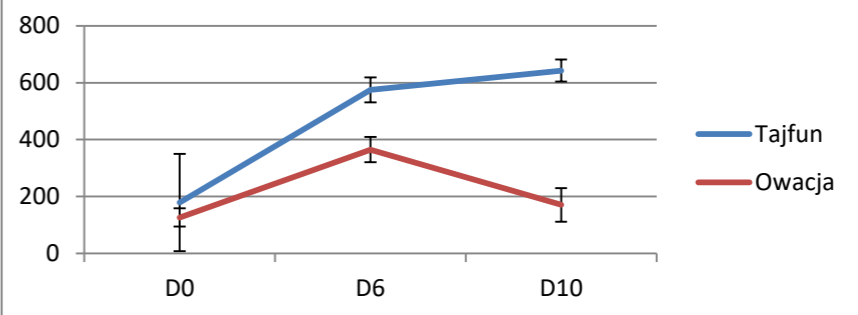

PGSC0003DMG400019944

PGSC0003DMG400019952 3,33 26 680,67 8 253,33 2120 5,77 5,29 544,65 5,29 31,01 419,73

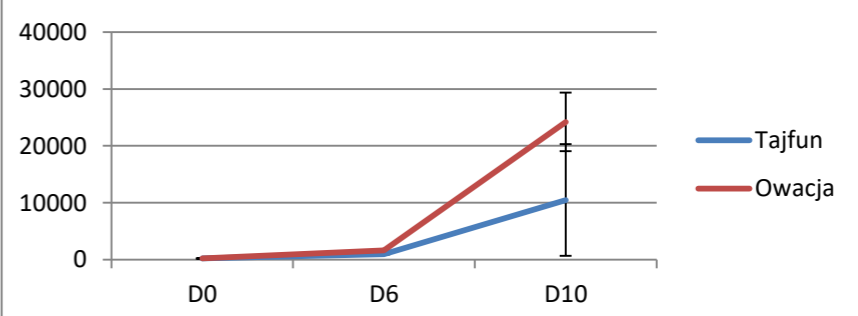

PGSC0003DMG400019952

PGSC0003DMG400020172 1084 5992,7 3465,67 804,33 4170,7 1615 226,11 303,58 204,84 205,22 491,08 207,28

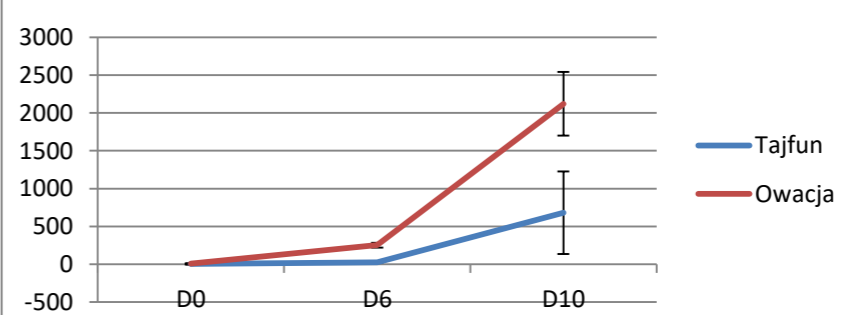

PGSC0003DMG400020172

PGSC0003DMG400020248 2092,67 5705,3 14486,7 2848 11689 24862 165,56 838,21 5933 591,37 2993,5 3433,5

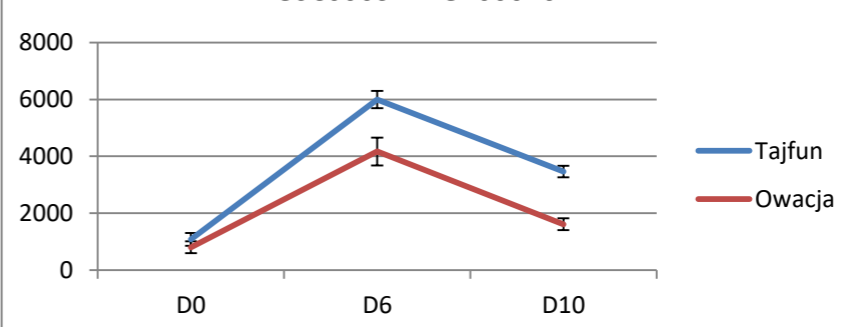

PGSC0003DMG400020248

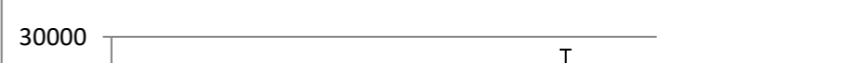

PGSC0003DMG400020542 1220 2617,3 2621,33 968,67 1903,3 1379,3 232,4 302,67 302,14 215,22 110,82 242,18

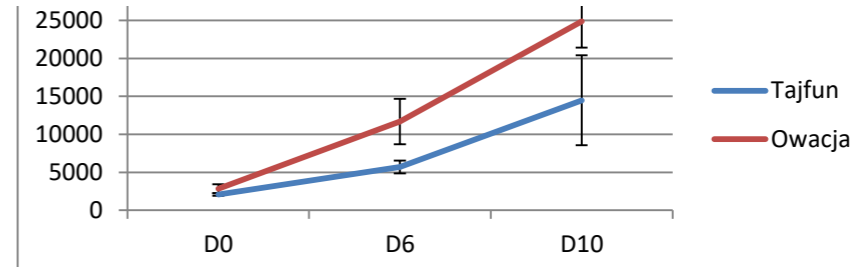

PGSC0003DMG400020542

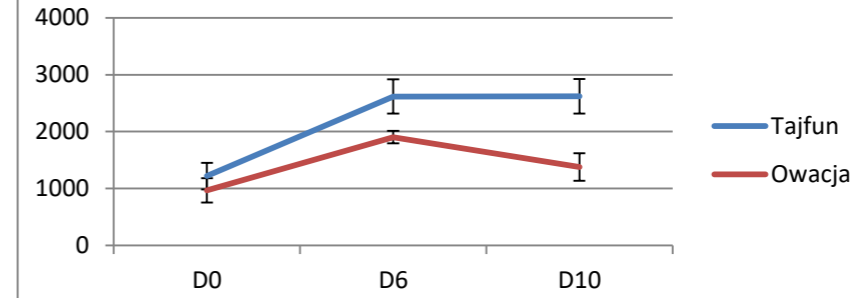

PGSC0003DMG400020603 552,33 1128 1151 285,33 458 432 246,5 41,9 270,24 112,22 34,18 57,09

PGSC0003DMG400020603

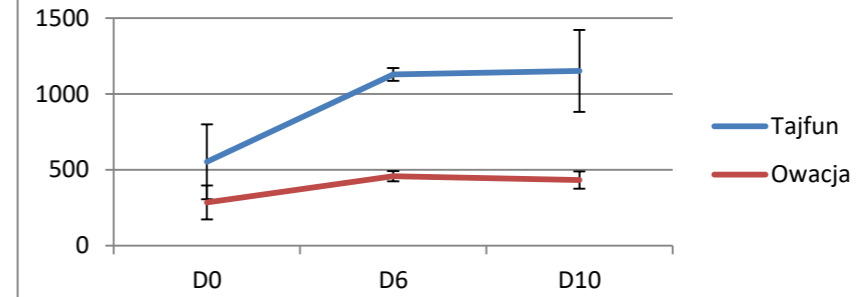

PGSC0003DMG400020620 863,33 2414,7 2915,33 780,67 4250,7 6892 181,3 313,13 1184,3 482,33 598,54 98,97

PGSC0003DMG400020620

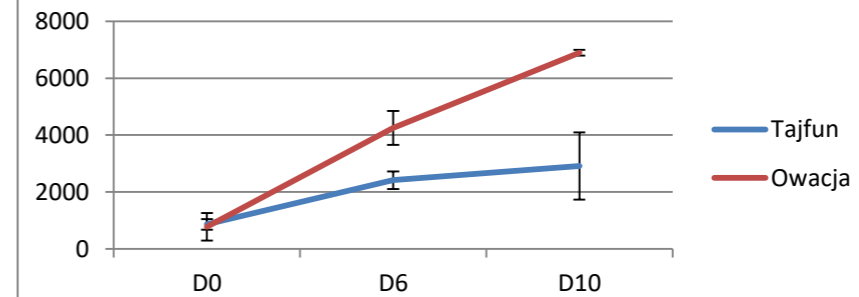

PGSC0003DMG400021039 408,67 2178,7 9366 442,67 6059,3 20715 52,62 301,49 3064,5 88,55 400,55 2423,24

PGSC0003DMG400021039

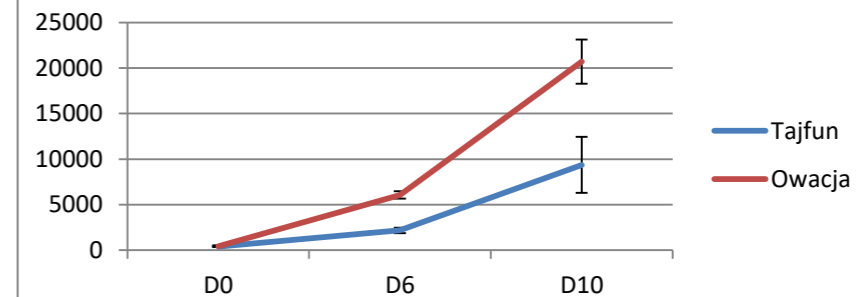

PGSC0003DMG400021158 3359,33 6069,3 7444 4096,67 4512,7 3968 427,29 729,32 1924,8 303,43 127,35 537,81

PGSC0003DMG400021158

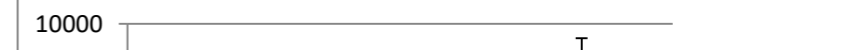

PGSC0003DMG400021177 266 854 644 132 547,33 278,67 117,78 85,06 115,31 71,53 35,85 82,01

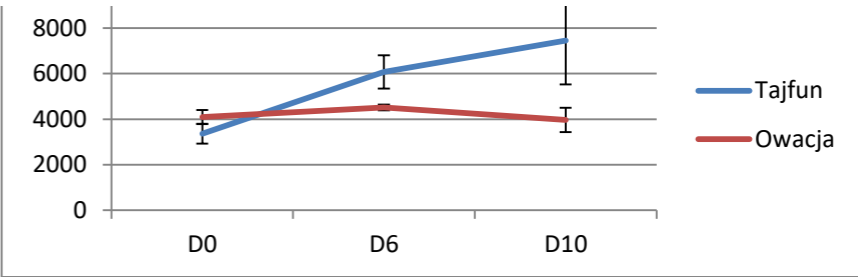

PGSC0003DMG400021177

PGSC0003DMG400021346 25,33 129,33 137,33 44 257,33 299,33 26,03 36,3 62,43 29,46 43 135,44

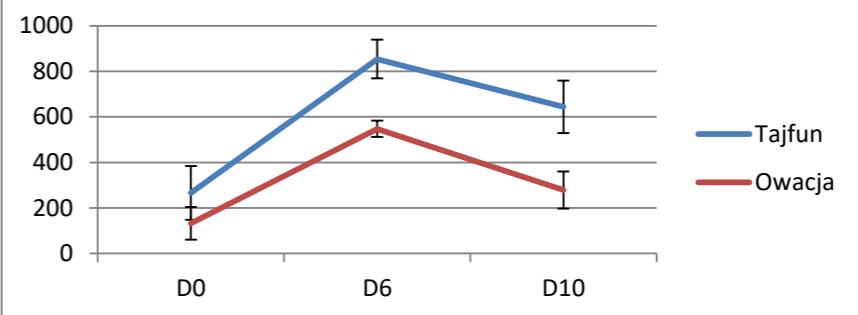

PGSC0003DMG400021346

PGSC0003DMG400021506 590 1564 2799,33 807,33 2732,7 5010 163,41 236,58 1415,5 166,06 384,22 547,07

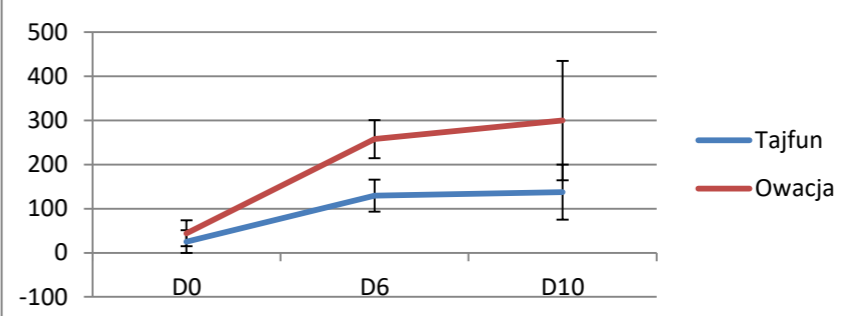

PGSC0003DMG400021506

PGSC0003DMG400022134 1398,67 3157,3 9540 1028,67 4773,3 15647 404,25 1013,1 2809 186,72 544,3 1389,74

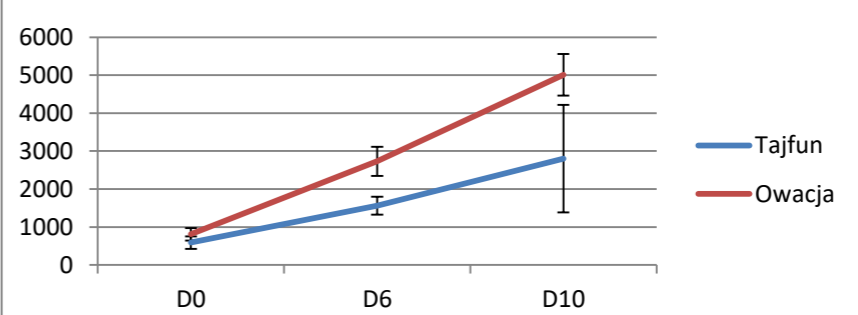

PGSC0003DMG400022134

PGSC0003DMG400022256 2524,33 6988,3 13331,3 1783,33 3178,7 6825,3 583,28 230,44 4362 382,21 332,42 433,19

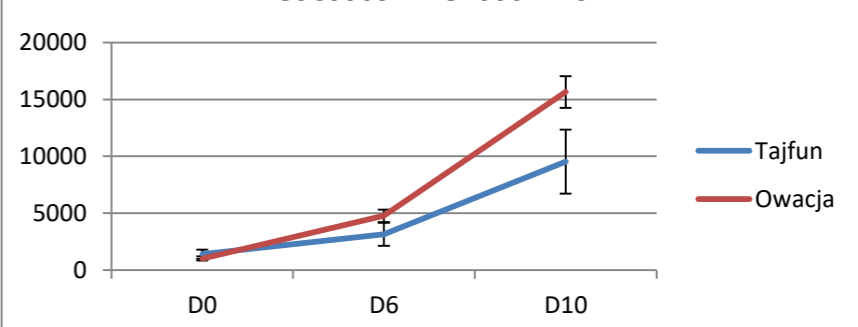

PGSC0003DMG400022256

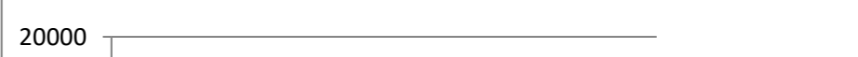

PGSC0003DMG400022257 7,33 348,67 383,33 6,67 121,33 28,67 6,43 61,78 82,4 1,15 25,32 6,43

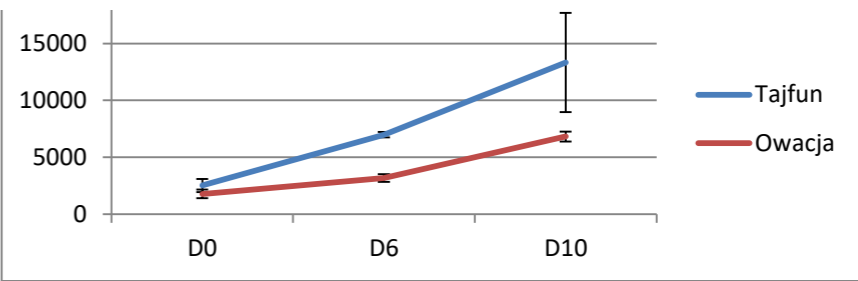

PGSC0003DMG400022257

PGSC0003DMG400022408 48,67 232,67 143,33 34,67 54,67 32 16,17 13,61 34,49 11,02 14,74 13,11

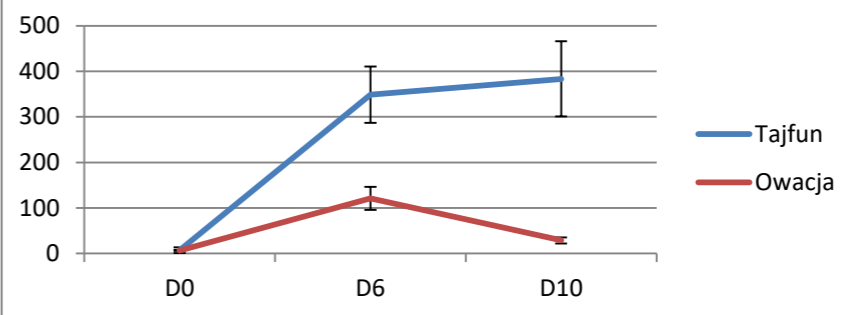

PGSC0003DMG400022408

PGSC0003DMG400022635 615,33 2427,3 4064,67 632,67 3672,7 8398,7 117,46 197,02 802,4 282,06 1001 2326,89

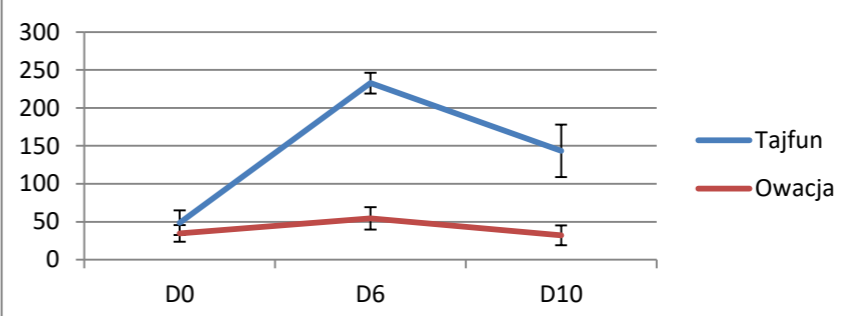

PGSC0003DMG400022635

PGSC0003DMG400022641 21,33 71,33 170 5,33 28,67 58,67 18,9 5,77 51,07 9,24 25,32 27,3

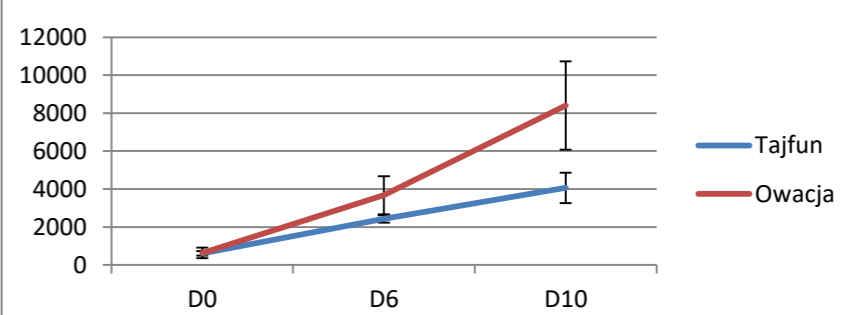

PGSC0003DMG400022641

PGSC0003DMG400022844 21,33 112 136,67 12,67 30 36,67 5,03 26,23 23,01 5,03 15,1 11,37

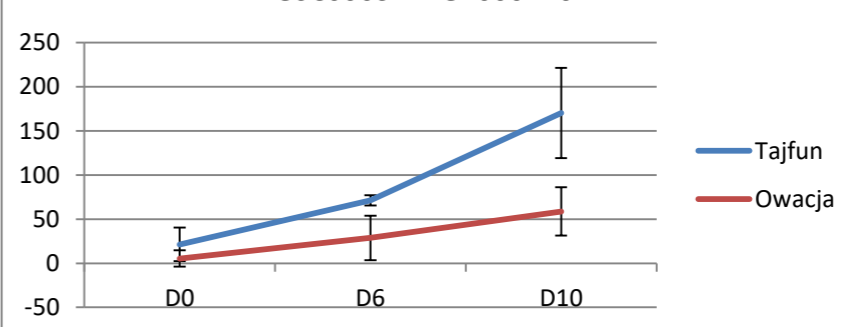

PGSC0003DMG400022844

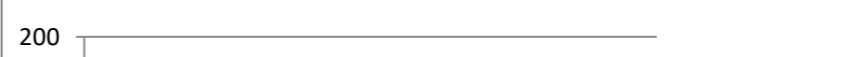



PGSC0003DMG400022898 562 1570 2149,33 622,67 2295,3 2968 91,65 167,22 616 227,62 239,37 173,59

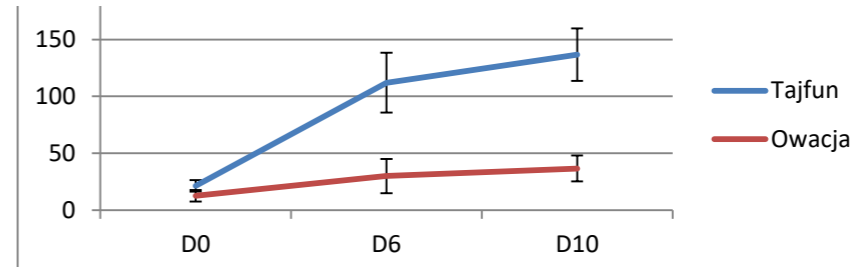

PGSC0003DMG400022898

PGSC0003DMG400022950 222 976 1781,33 224 1494 3391,3 122,52 153,26 1209,9 87,18 362,86 311,44

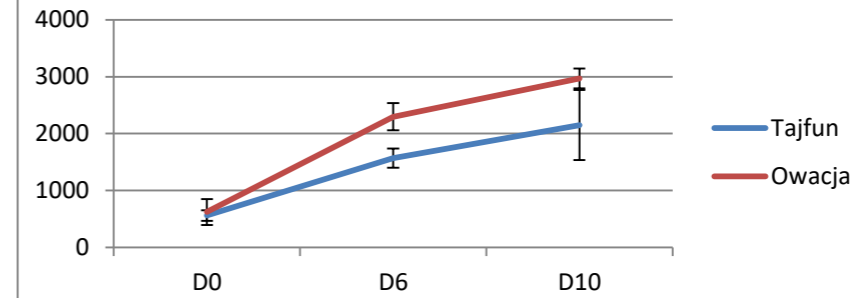

PGSC0003DMG400022950

PGSC0003DMG400022976 435 871,67 993 294,67 547,33 362 130,66 142,48 157,04 19,63 168,49 8,89

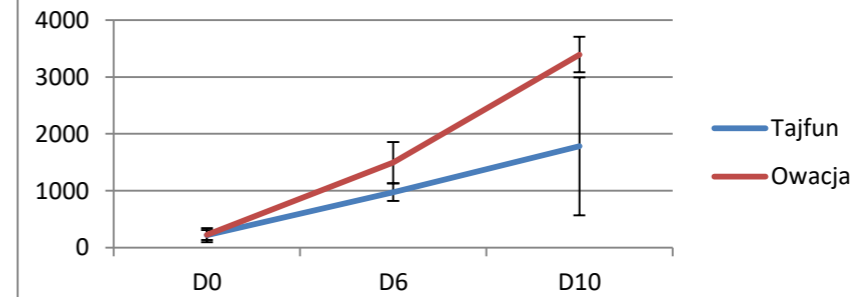

PGSC0003DMG400022976

PGSC0003DMG400023453 3662,67 13541 12042 2713,33 8696,7 5480,7 1123 946,61 2851 775,48 617,82 909,18

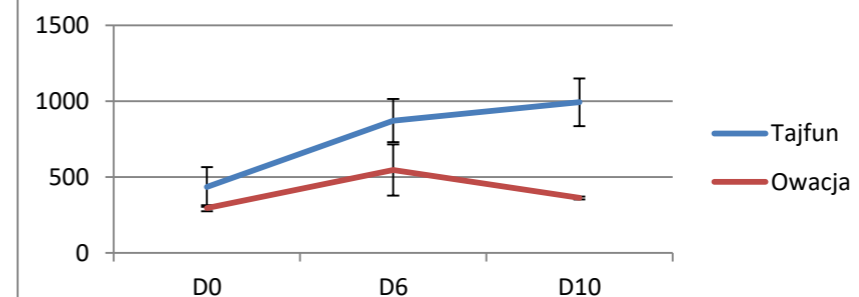

PGSC0003DMG400023453

PGSC0003DMG400023726 106 332,67 296 74 145,33 89,67 26,15 53,15 100,46 32,19 12,5 21,08

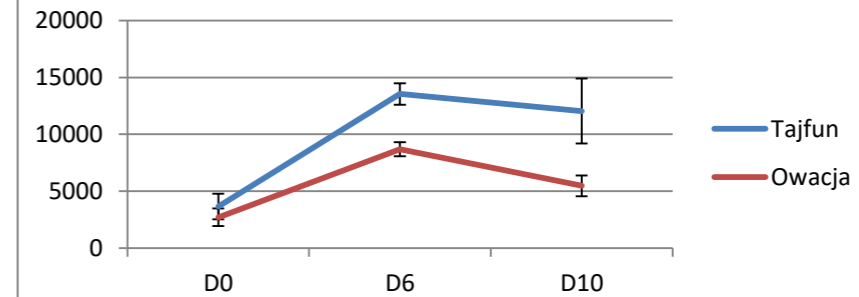

PGSC0003DMG400023726

500

PGSC0003DMG400023771 11186 26657 32468 9689,33 38548 51276 2499,6 2129,6 12582 2826 5564,6 3632,19

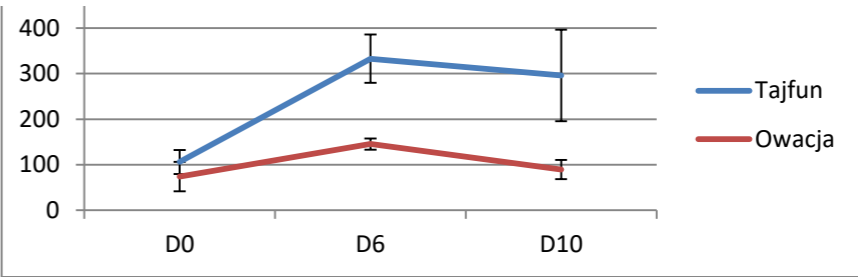

PGSC0003DMG400023945 467,33 1528,7 3044,67 572,67 2023,3 1516 86,01 192,93 466,07 18,04 17,01 325,37

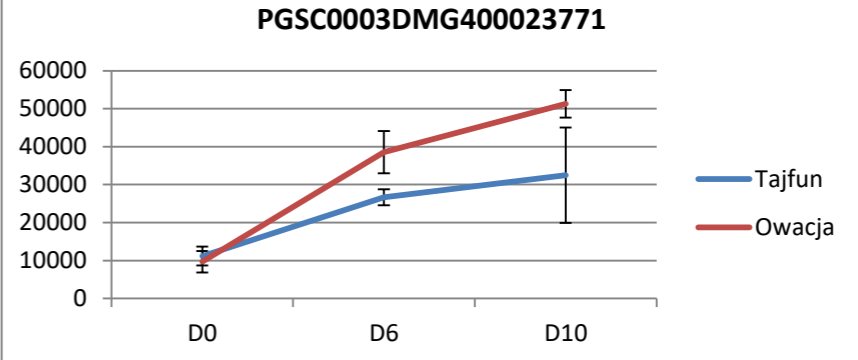

PGSC0003DMG400023979 88 1133,7 6516,67 144,67 1674,7 2511 81,19 273,35 2114,5 129,56 217,49 405,12

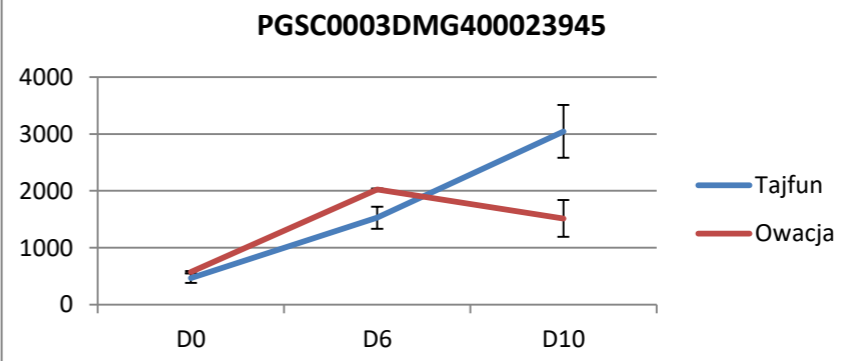

PGSC0003DMG400024093 23,33 3823,3 4459,33 9,33 672,67 390,67 5,03 905,54 66,16 3,06 156,43 130,79

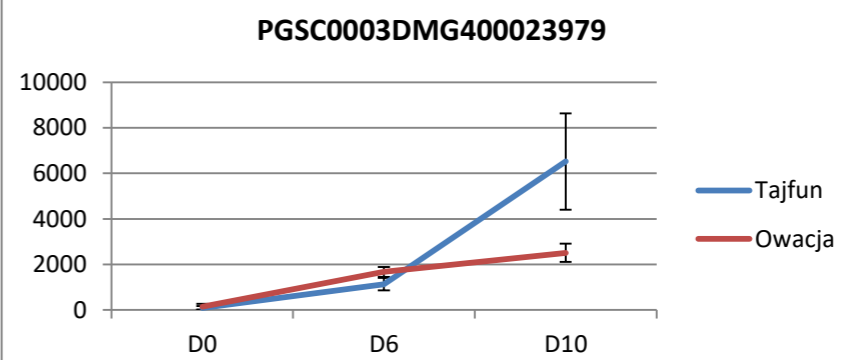

PGSC0003DMG400024860 40,67 1156,7 2760 24 1873,3 4369,3 20,03 157,74 1637,8 17,44 211,68 1162,19

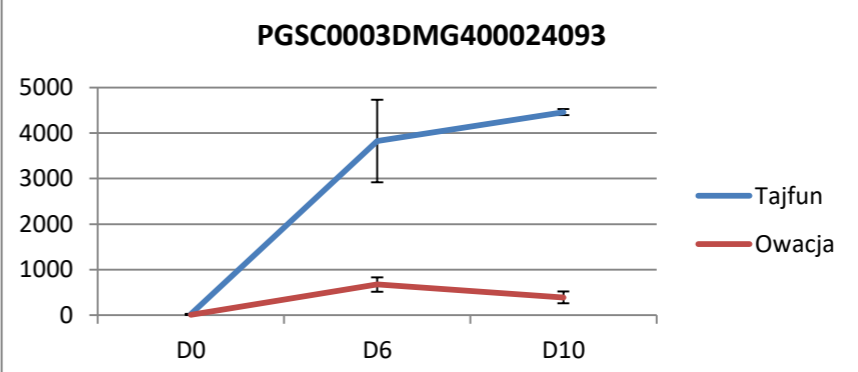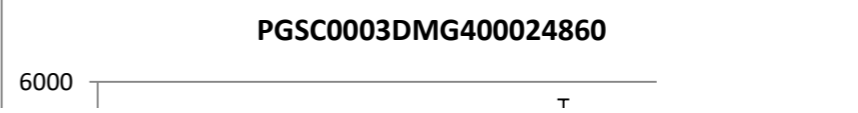

PGSC0003DMG400024929 1952,67 3831,3 4170 2058 2584,7 1675,3 335,63 661,11 647,56 772,35 380,15 258,66

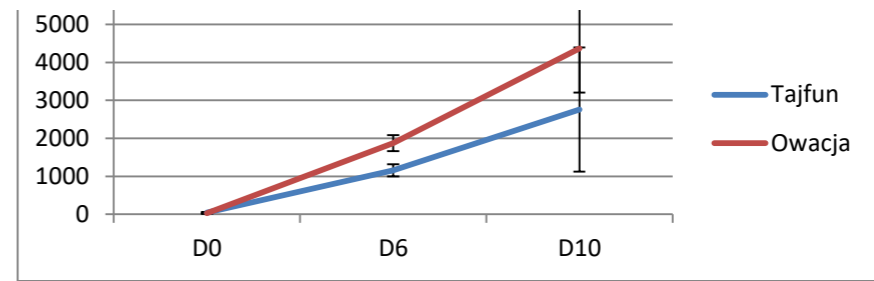

PGSC0003DMG400024929

PGSC0003DMG400025154 2117,33 3950 5724,67 1443,33 2608,7 2682 347,1 629,14 329,22 257,64 264,59 814,77

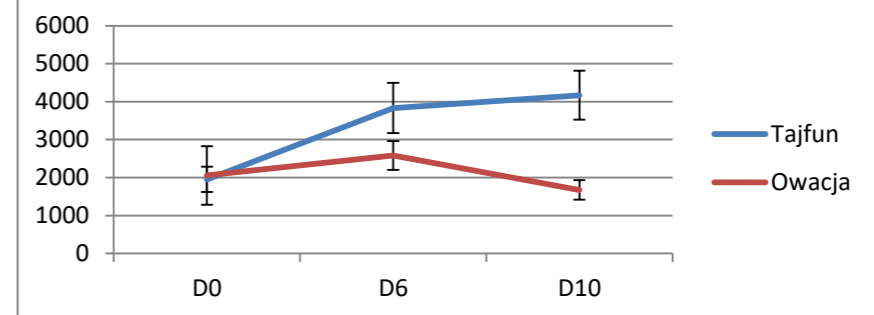

PGSC0003DMG400025154

PGSC0003DMG400025223 354,67 734 982,67 420 1232 1516 32,88 43,41 165,44 144,04 28 92,97

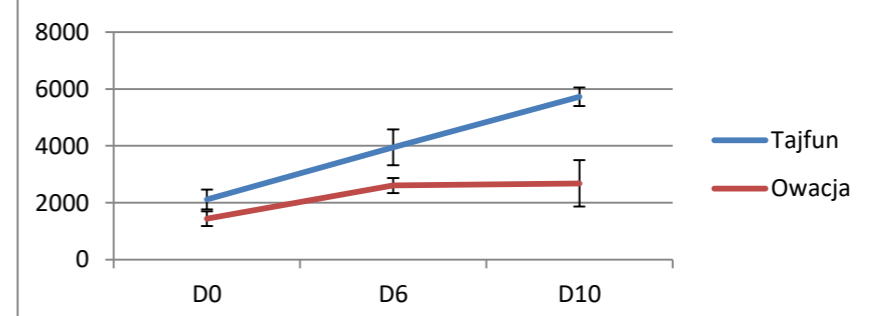

PGSC0003DMG400025223

PGSC0003DMG400025798 604 1102 2022 693,33 1841,3 3304,7 182,79 97,75 672,72 129,06 314,49 50,29

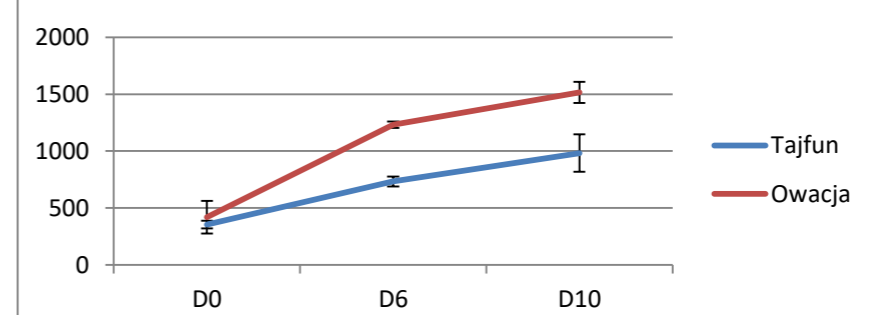

PGSC0003DMG400025798

PGSC0003DMG400025852 651,33 1246 1930,67 450,67 717,33 521,33 94,71 42,76 513,47 48,01 142,9 110,37

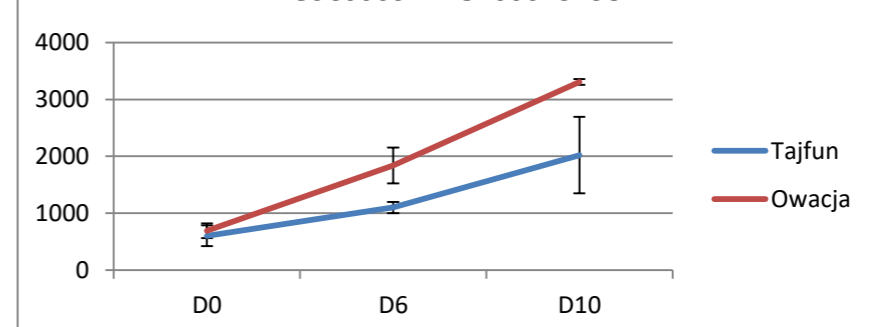

PGSC0003DMG400025852

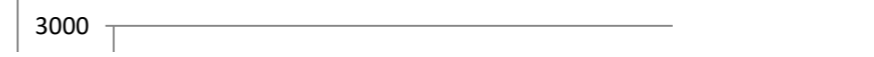

PGSC0003DMG400025888 969,33 3640,7 7650 1081,33 6255,7 10496 90,78 406,43 2020,2 132,07 413,68 357,79

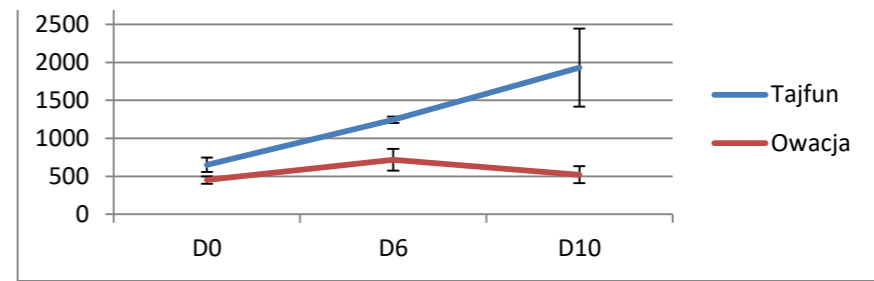

PGSC0003DMG400025888

PGSC0003DMG400026262 1604 2954,7 3234,67 1262,67 1401,3 1332,7 440,8 389,69 308,61 94,71 83,58 67

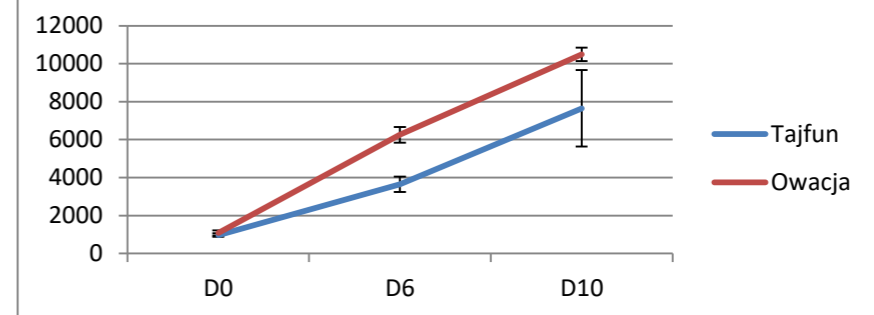

PGSC0003DMG400026262

PGSC0003DMG400026359 193 689,33 1373,33 225,33 1212,7 2690,3 22,87 131,37 459,19 92,03 459,52 888,23

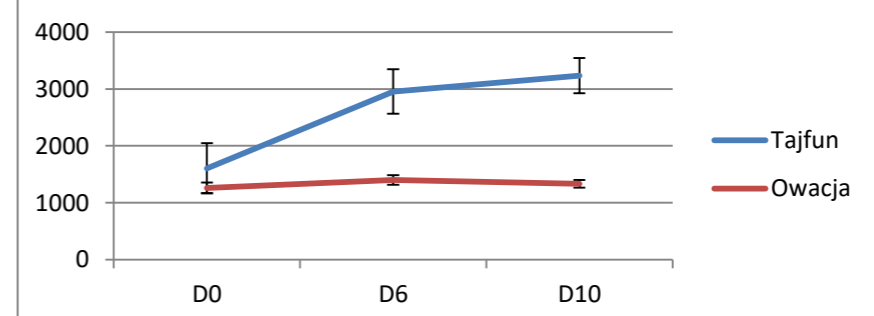

PGSC0003DMG400026359

PGSC0003DMG400026361 4549,33 9502 12070,7 4657,33 5952,7 4478 366,62 1016,1 2293,1 193,02 786,65 981,34

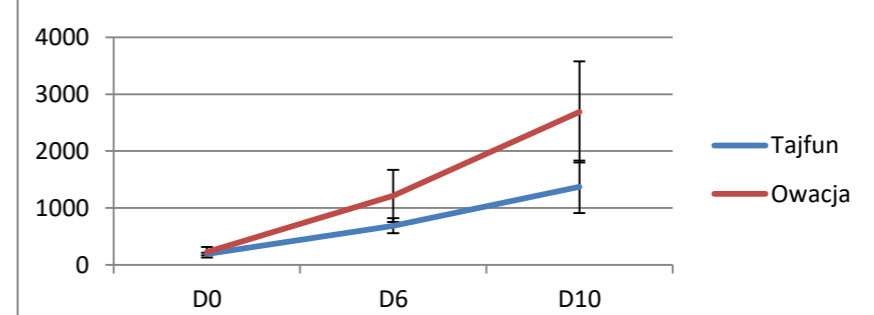

PGSC0003DMG400026361

PGSC0003DMG400026405 167,33 764 1166,67 154 487,33 538 19,43 48 315,78 36,72 55,22 85,86

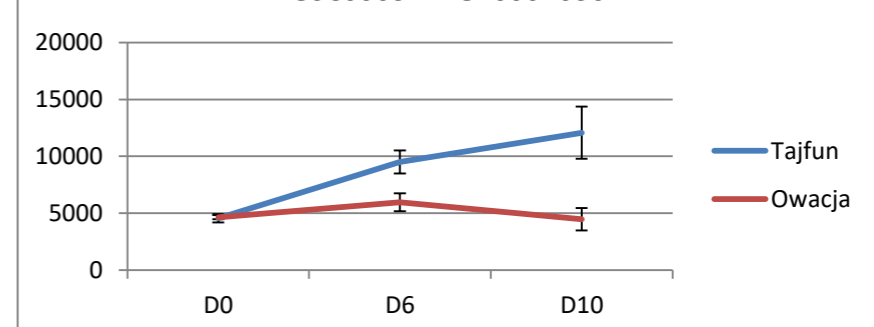

PGSC0003DMG400026405

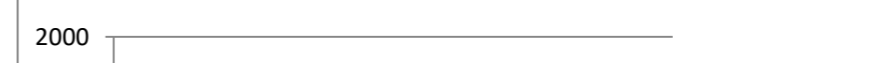

PGSC0003DMG400026527 3600 6580 6655,33 3479,33 9125,7 9444 1080,6 907,73 210,5 843,74 986,16 1477,43

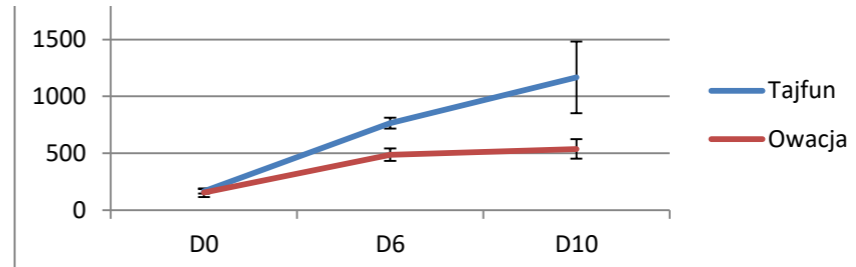

PGSC0003DMG400026527

PGSC0003DMG400026646 311,33 609,33 1353,33 394,67 911,33 2187,3 35,57 98,43 436,09 85,47 92,72 502,92

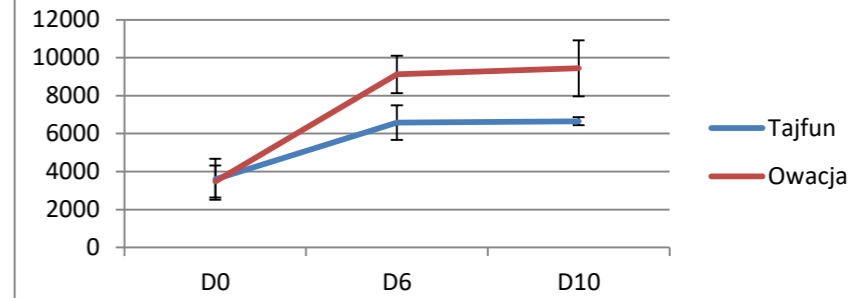

PGSC0003DMG400026646

PGSC0003DMG400026647 227,33 529,33 1077,33 322,67 934 1778 34,78 107,04 299,63 51,16 80,22 397,64

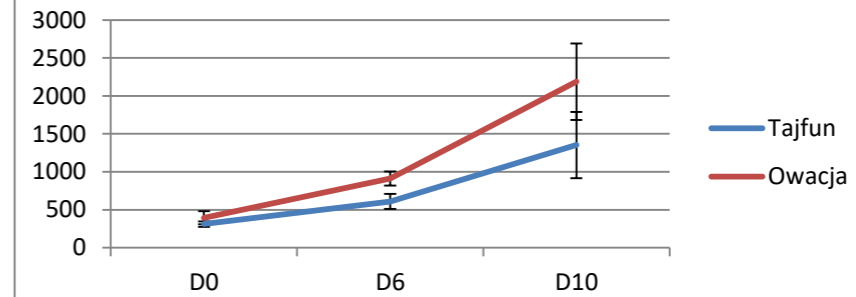

PGSC0003DMG400026647

PGSC0003DMG400026778 385,33 1724,7 2955,33 361,33 8280 11662 15,01 146,89 799,54 87,32 667,76 1789,26

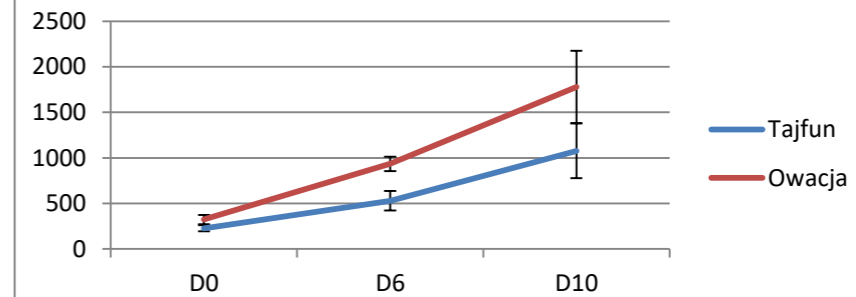

PGSC0003DMG400026778

PGSC0003DMG400026818 1761,33 3607,3 3898,67 1480,33 2542,7 2270 547,04 341,32 1072 550,76 305,03 508,78

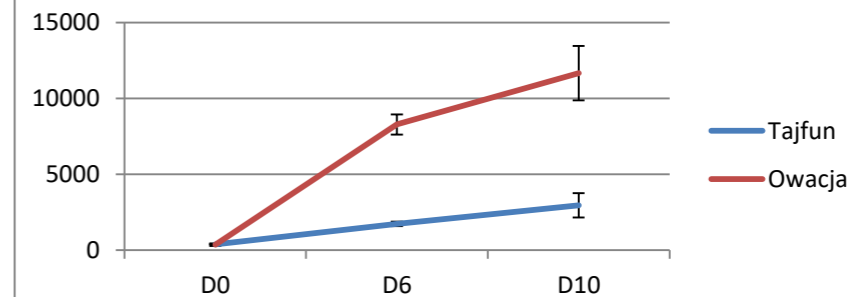

PGSC0003DMG400026818

6000

PGSC0003DMG400027739 2286,67 5685,3 6423,33 2742,67 9112,7 9678,7 415,43 750,45 1013,9 812,07 742,82 1097,02

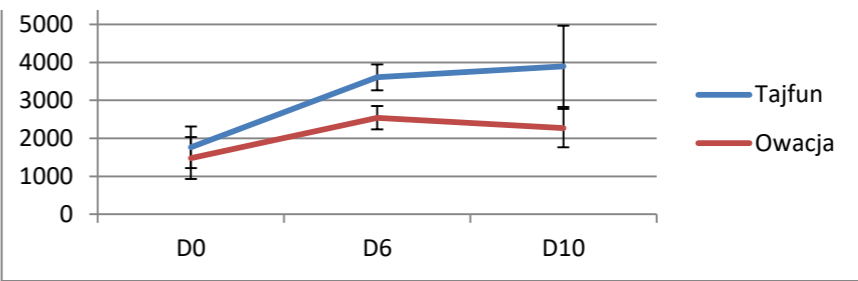

PGSC0003DMG400027743 65,33 269,33 181,33 46 103,33 73,33 18,15 37,11 10,07 18,33 45,71 14,05

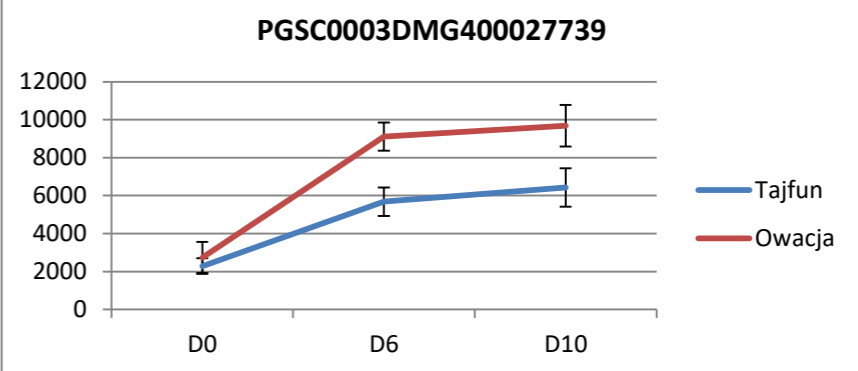

PGSC0003DMG400027758 153,33 362 578 220,67 934 1324,7 46,06 93,53 94,93 65,03 207,57 383,36

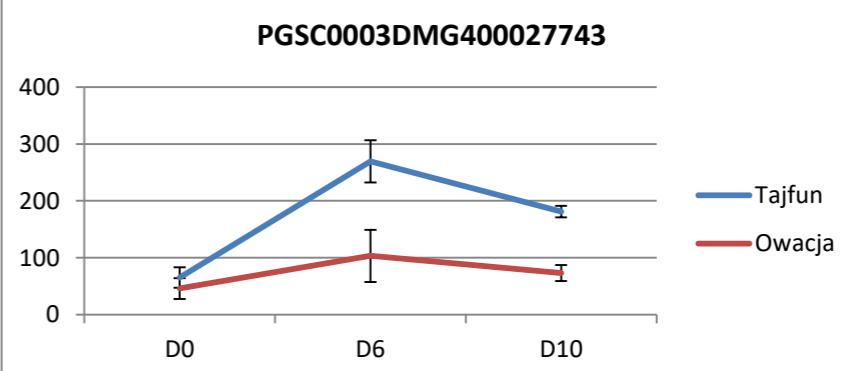

PGSC0003DMG400028129 186 560 430 142 281,33 223,33 10,39 55,24 46,6 43,86 44,47 20,03

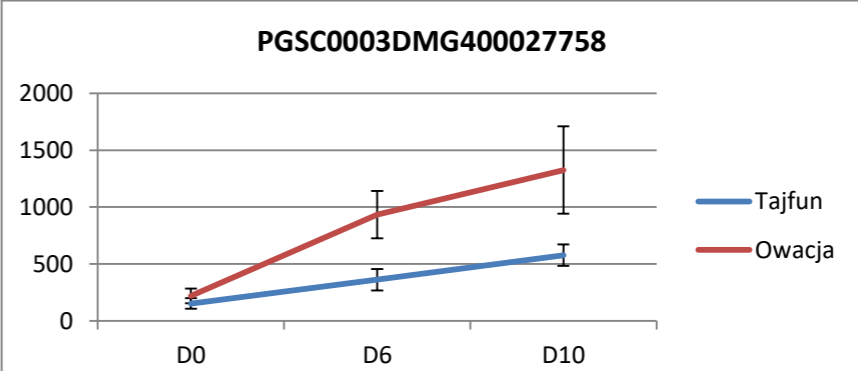

PGSC0003DMG400028166 115,33 1158,3 252,67 70,67 468 8,67 53,08 133,43 21,39 18,15 45,21 15,01

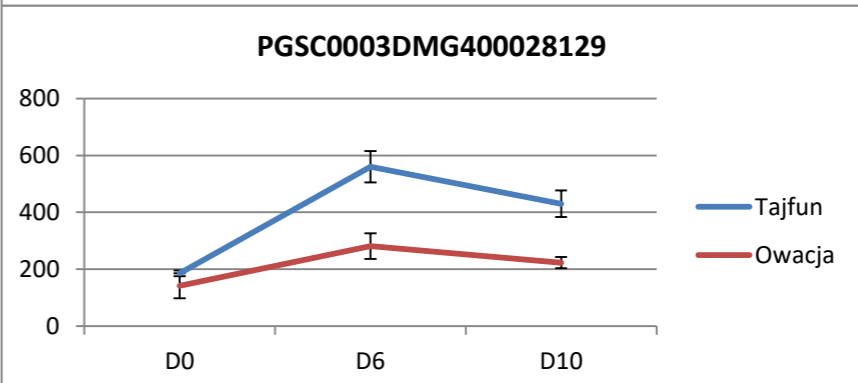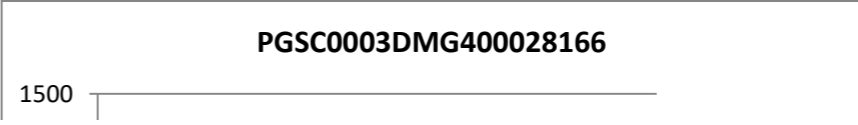

PGSC0003DMG400028286 175,33 977,33 1170,67 173,33 1761,3 697,33 62,14 96,67 242,83 26,1 165 101,61

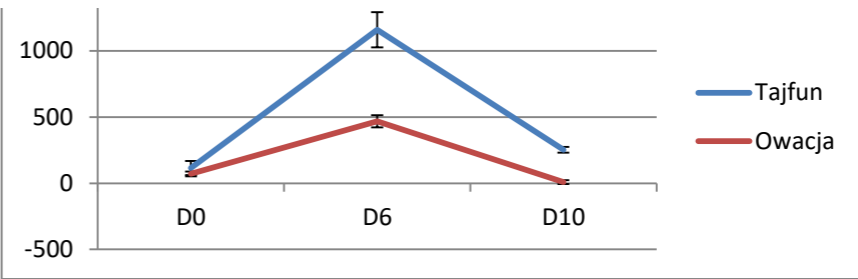

PGSC0003DMG400028364 109,33 333,33 258,67 102 182 87,33 63,79 75,16 27,3 52,12 71,19 10,26

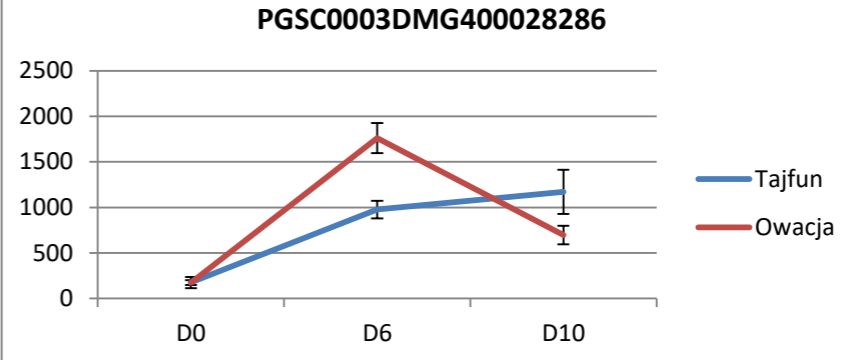

PGSC0003DMG400028514 1009,33 2888 2544,67 931,33 1958 1280 283,03 464,63 180,33 83,72 276,22 169,58

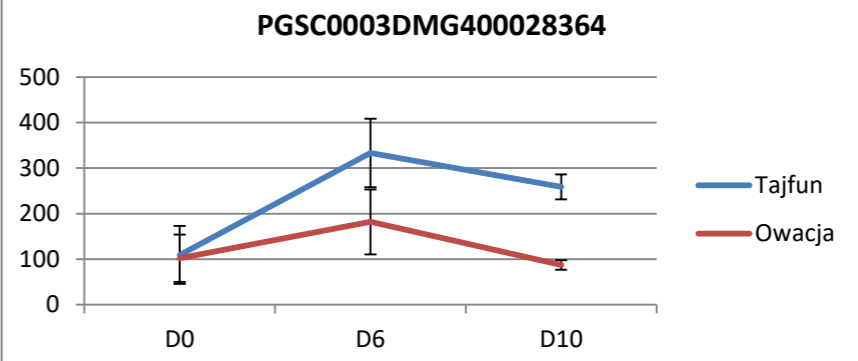

PGSC0003DMG400028600 26 228,67 356,67 24 138,67 137,33 45,03 28,73 103,47 41,57 54,2 28,94

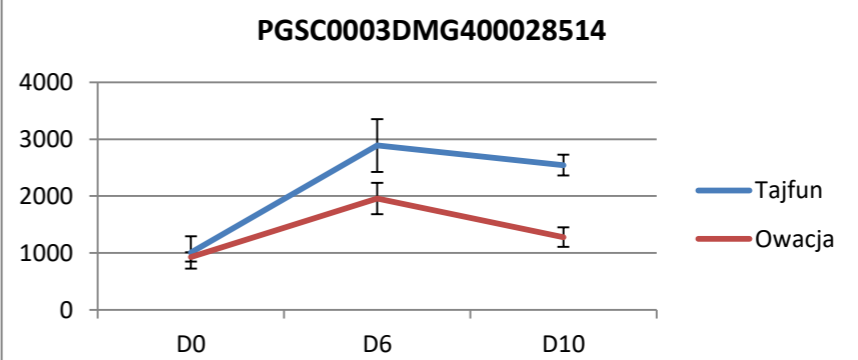

PGSC0003DMG400028635 234,67 569,33 1166,67 204 1106 3680 23,18 155,77 845,97 39,95 165,78 1214,4

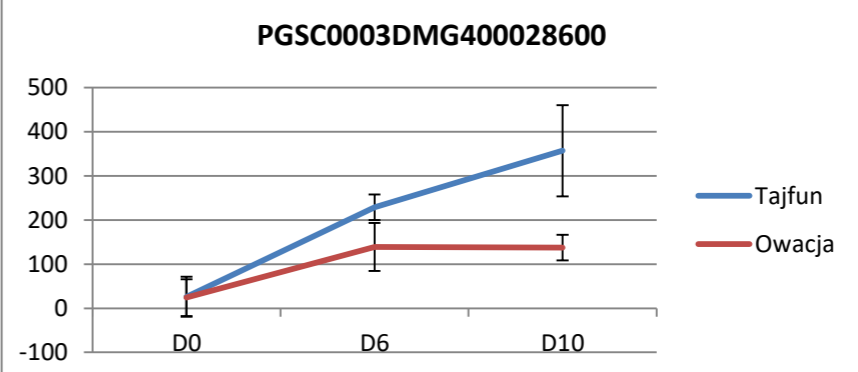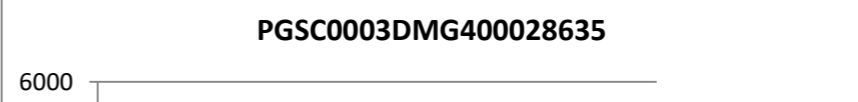

**PGSC0003DMG400028744** 434,67 820 1024 380 349,33 392 71,7 131,77 64,9 76,32 80,13 40,15

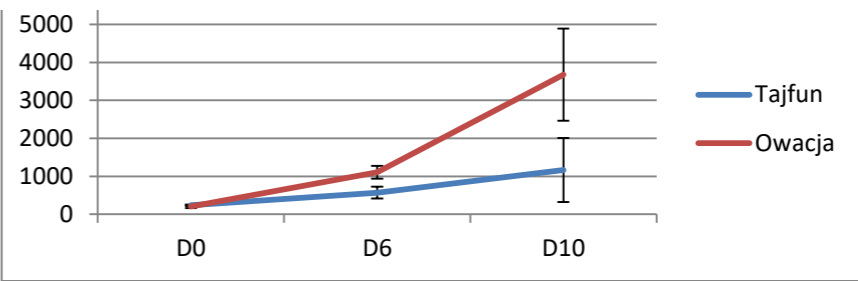

**PGSC0003DMG400028744**

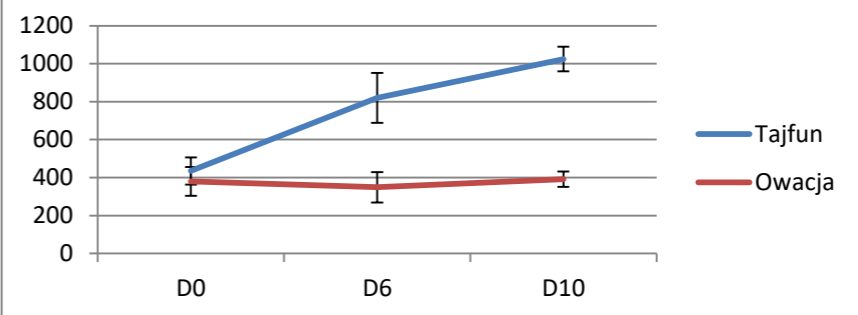

**PGSC0003DMG400028819** 524 7061,3 2096 350 2731,3 1044 161,15 397,12 631,02 125,2 140,3 107,68

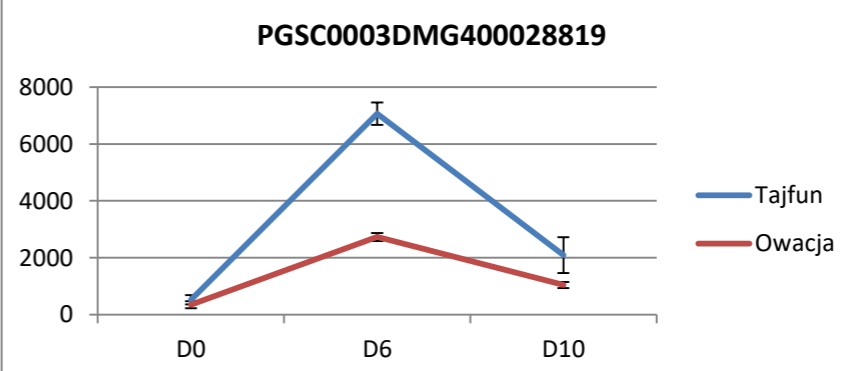

**PGSC0003DMG400028819**

**PGSC0003DMG400029074** 781,33 1714 3012,67 1257,33 2993,3 6078 55,15 190,78 877,81 310,91 281,94 1272,62

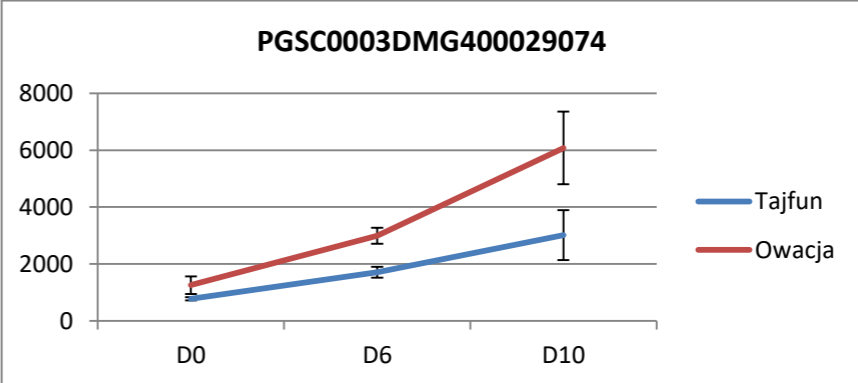

**PGSC0003DMG400029074**

**PGSC0003DMG400029207** 1159,67 3293,7 6129,67 1029,33 1223,7 2005,3 365,74 950,68 3292,4 412,82 387,05 1384,72

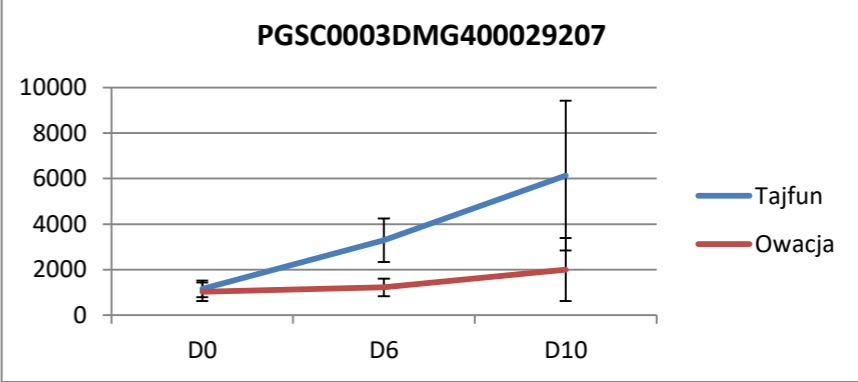

**PGSC0003DMG400029207**

**PGSC0003DMG400029396** 188,67 1940 566 217,33 1192 267,33 21,01 344,4 29,46 127,08 394,42 37,54

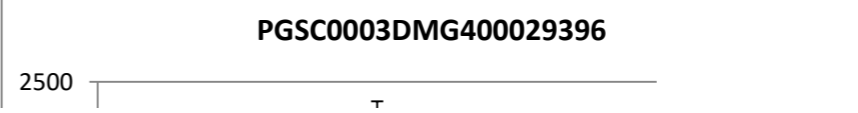

**PGSC0003DMG400029396**



PGSC0003DMG400029517 3035,33 9693,3 28171,3 3007,33 20446 68051 176,19 621,93 16187 827,42 482,82 12260,5

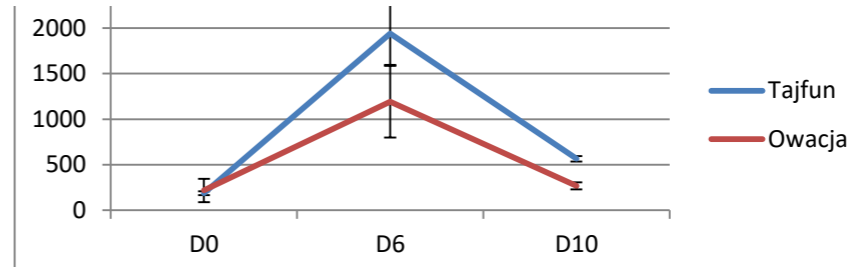

PGSC0003DMG400029517

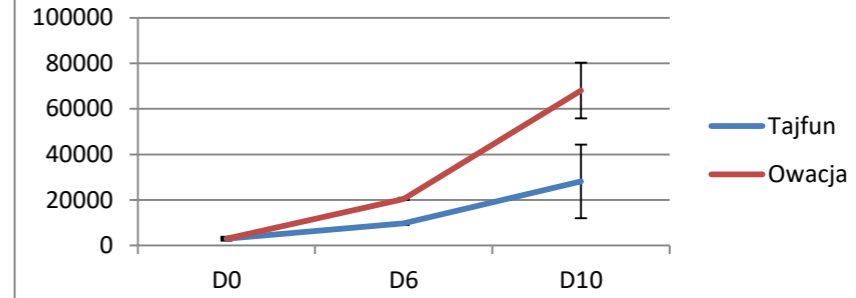

PGSC0003DMG400029557 48 178 294 15,33 44,67 81 47,03 30,27 96,56 16,04 6,11 30,05

PGSC0003DMG400029557

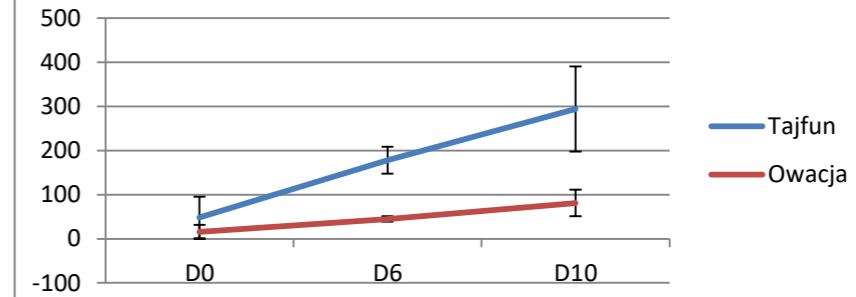

PGSC0003DMG400029727 170 2211,7 5671,33 67,33 361,67 800,67 163,45 1309 2821,8 40,86 82,1 340,1

PGSC0003DMG400029727

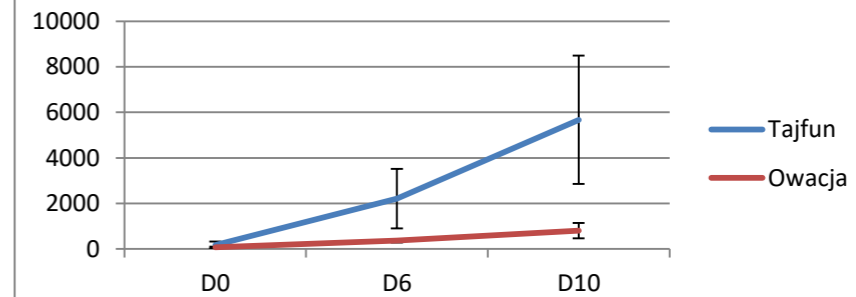

PGSC0003DMG400029732 8484 38739 36219,3 7929,33 24672 9977,3 3679,8 6904,6 3462,1 3582,6 2523,1 596,93

PGSC0003DMG400029732

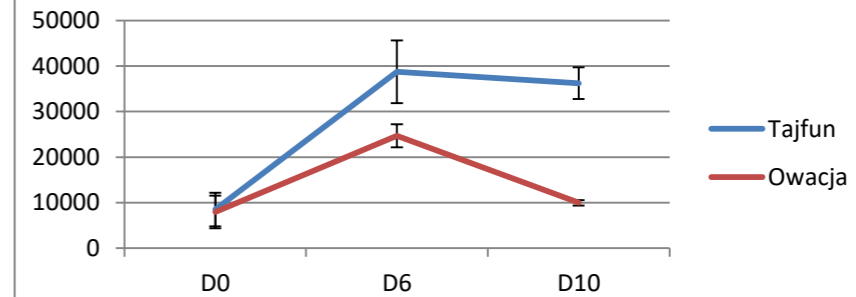

PGSC0003DMG400029841 399,33 1029,3 2648 366 716,67 1519,3 221,31 151,4 97,02 121,8 13,01 278,29

PGSC0003DMG400029841

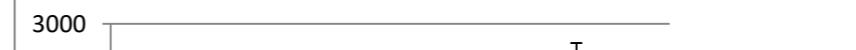

PGSC0003DMG400029867 375,33 854 846,67 411,33 1185,3 177,33 20,13 150,64 252,13 65,49 116,57 45,62

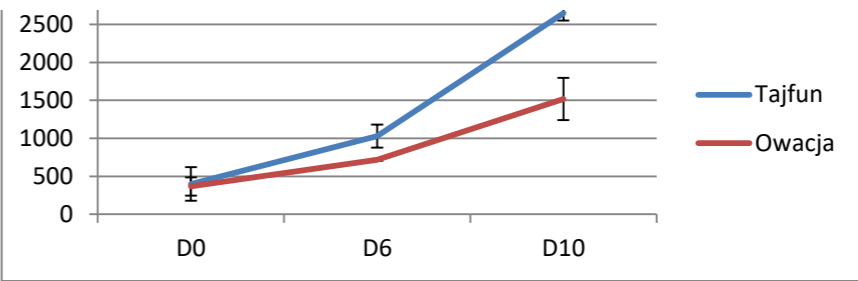

PGSC0003DMG400029872 218,67 798 2124 194,67 1192 4129,3 84,39 136,4 731,63 73,71 111,14 312,07

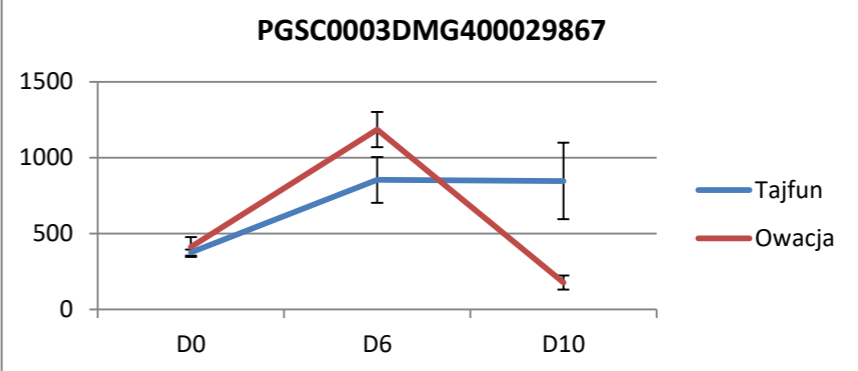

PGSC0003DMG400030008 14,67 962 827,33 0 2208,7 466,67 25,4 442,87 224,19 0 559,72 151,93

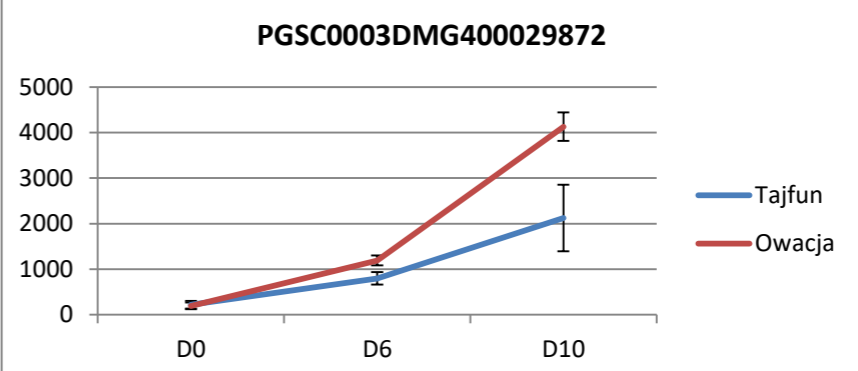

PGSC0003DMG400030186 637,33 1708 2389,33 557,33 1058 944 161,57 225,2 643,96 63,32 214,95 182,03

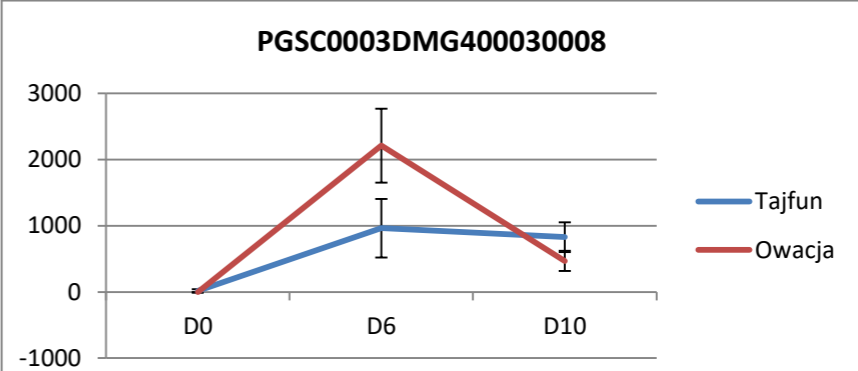

PGSC0003DMG400030379 866,67 2100 2140,67 668 1290 1002,7 81,05 137,88 268,96 117,93 60 156,75

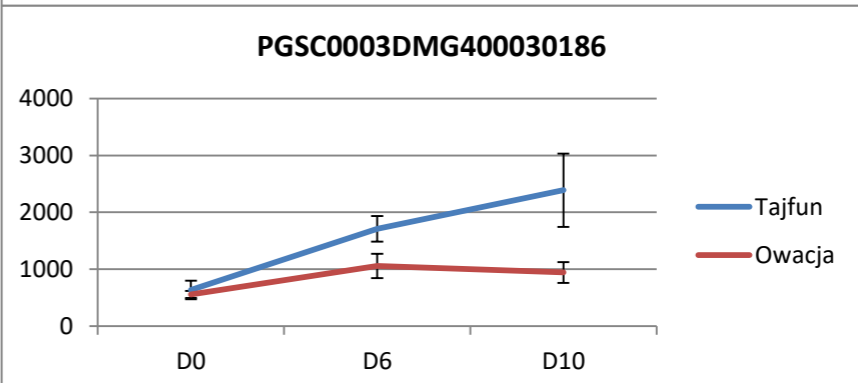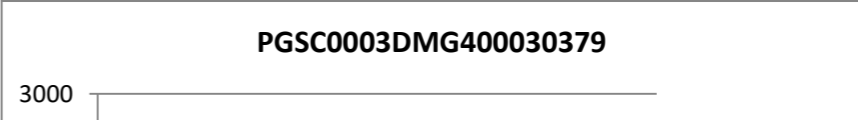

PGSC0003DMG400030504 288 690 1055,33 151,33 282 196 105,83 156,17 397,6 61,23 150,77 34,12

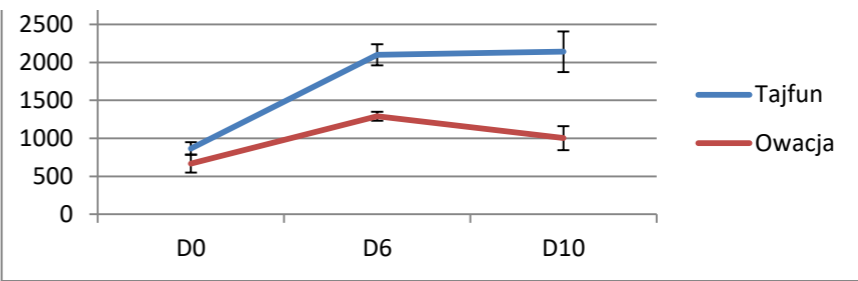

PGSC0003DMG400030504

PGSC0003DMG400030526 340,67 952 904,67 325,33 607,33 349,33 81,05 63,59 158,31 85,47 113,04 95,21

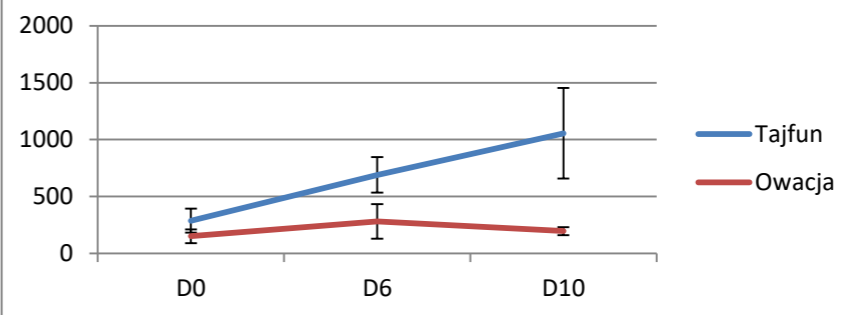

PGSC0003DMG400030526

PGSC0003DMG400030617 762,67 5535,3 7324,67 574,67 3368 1104 115,24 934,1 2361,3 55,51 397,88 114,07

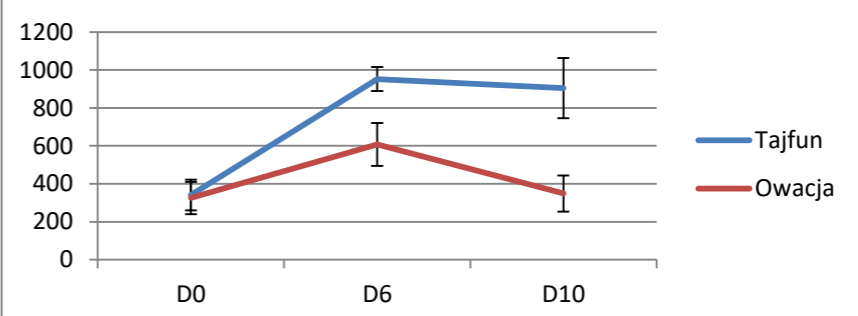

PGSC0003DMG400030617

PGSC0003DMG400030635 386,33 892 838,33 264,67 528,67 392,67 78,68 147,96 36,83 102,63 79,76 144,65

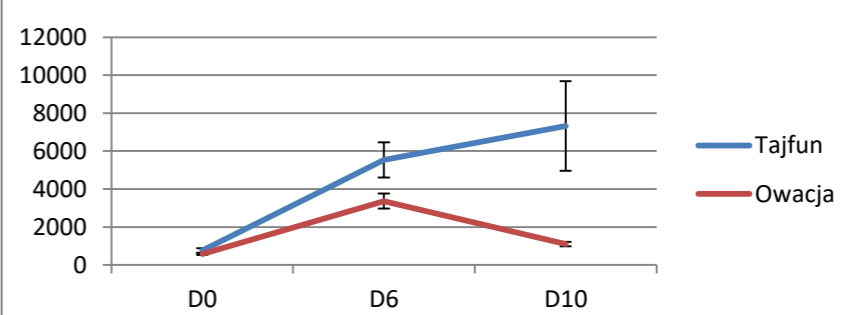

PGSC0003DMG400030635

PGSC0003DMG400030891 1635,33 4733,3 22470 1708 12733 53769 175,62 226,29 14123 482,07 4004,9 11162,2

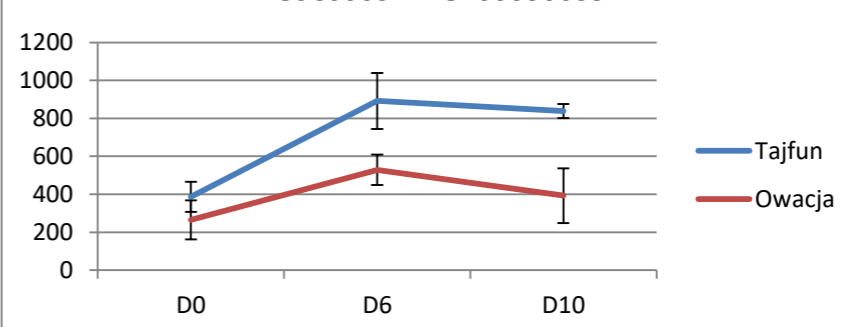

PGSC0003DMG400030891

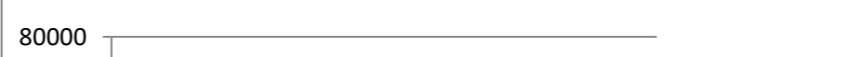

PGSC0003DMG400031131 4690 9151 13503 4160,33 13507 21043 370,36 792,02 1342,9 1531,4 1229,6 1269,44

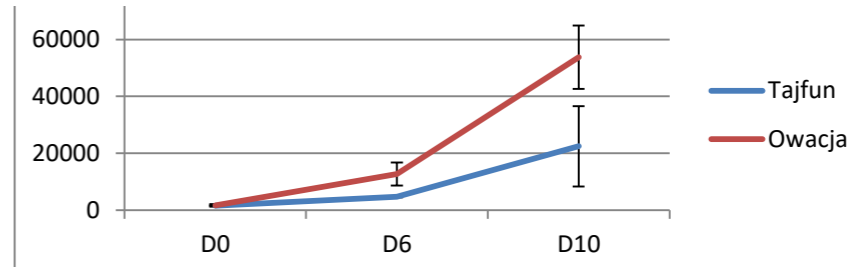

PGSC0003DMG400031131

PGSC0003DMG400031213 194,67 587,33 708,67 84,67 312,67 214 72,7 46,36 143,39 83,05 191,26 61,02

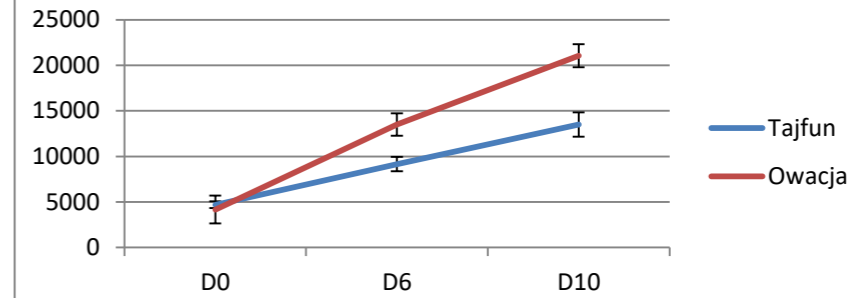

PGSC0003DMG400031213

PGSC0003DMG400031411 1,33 492,67 1006 8 1535,3 1358,7 2,31 181,12 337,82 13,86 218,22 213,13

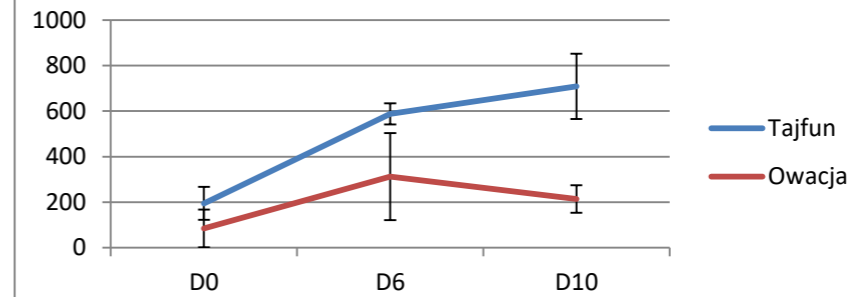

PGSC0003DMG400031411

PGSC0003DMG400031871 1676 4408,7 4594 1154 2817,3 2287,3 133,28 718,59 295,7 62,35 195,36 330,49

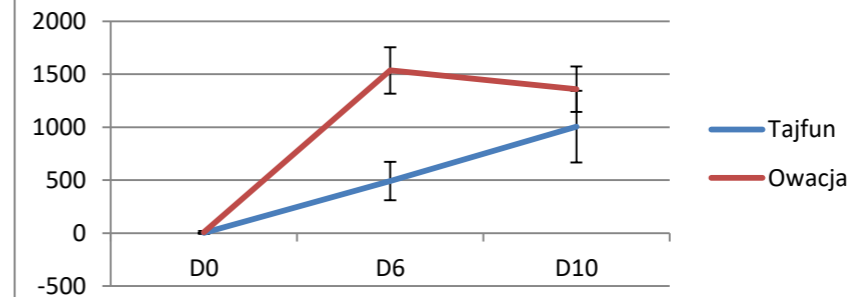

PGSC0003DMG400031871

PGSC0003DMG400033140 32,67 132 146,67 24 59,33 59,33 29,69 10 33,61 15,1 23,01 20,82

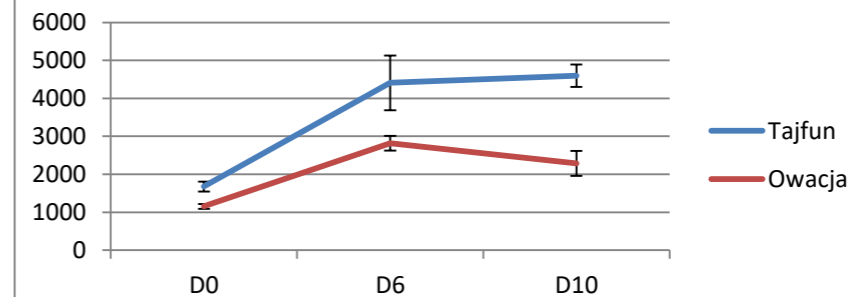

PGSC0003DMG400033140

200

PGSC0003DMG400033567 4610,67 13966 21960 5976,33 27265 33247 477,22 2929 1880,5 1439,5 2484,3 6674,91

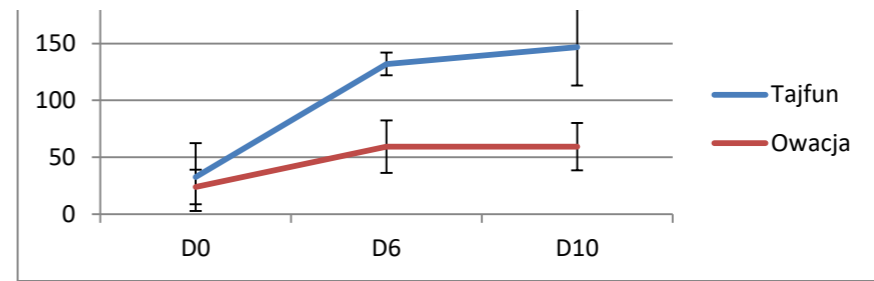

PGSC0003DMG400033579 1340 2307,3 2496,67 1315,33 1232,7 1473,3 86,19 186,72 150,1 204 143,11 219,93

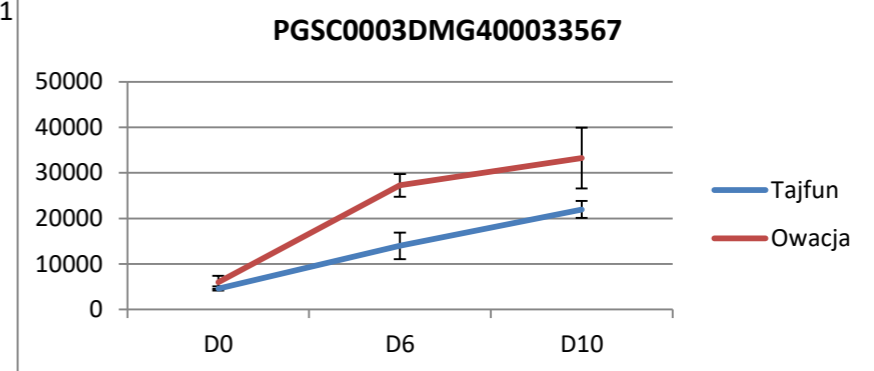

PGSC0003DMG400033876 530 6070,7 3018 203,33 4556,3 1496,7 446,87 877,61 789,22 114,93 256,89 321,76

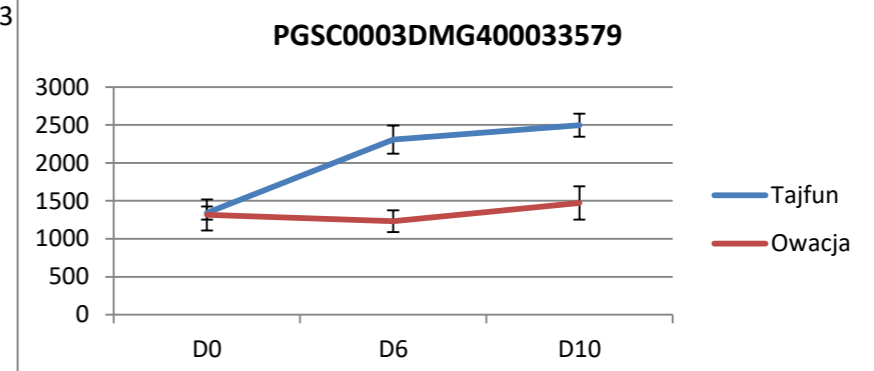

PGSC0003DMG400033931 4 310 111,33 0,67 103,33 28 4 123,47 15,53 1,15 67,72 24

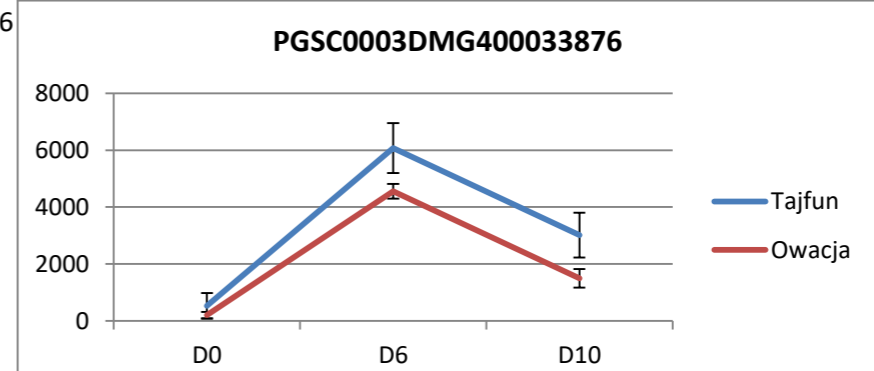

PGSC0003DMG400035200 32,67 3902 4025,33 21,33 5581,3 1737,3 11,02 622,04 1536,8 7,02 1240,6 175,38

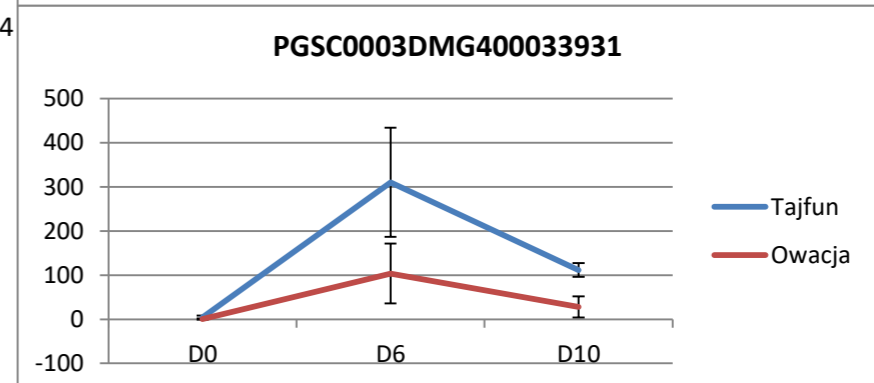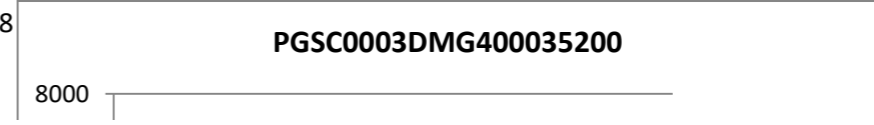

PGSC0003DMG400035337 1280 2834,7 2912 1202,67 1828,7 1637,3 199,19 85,8 385,56 182,54 615,53 75,75

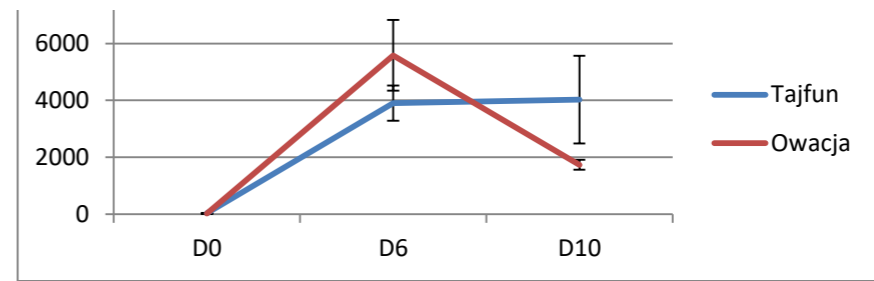

PGSC0003DMG400036082 644 1550 1788 722 1095,3 886,67 51,26 116,26 381,58 82,44 119,84 213,28

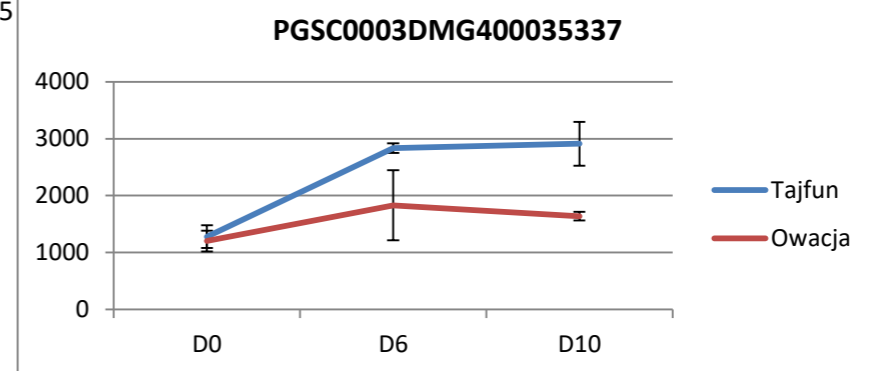

PGSC0003DMG400036477 156,67 508,67 616,67 132 309,33 317,33 75,96 32,33 58,53 34,7 46,23 48,76

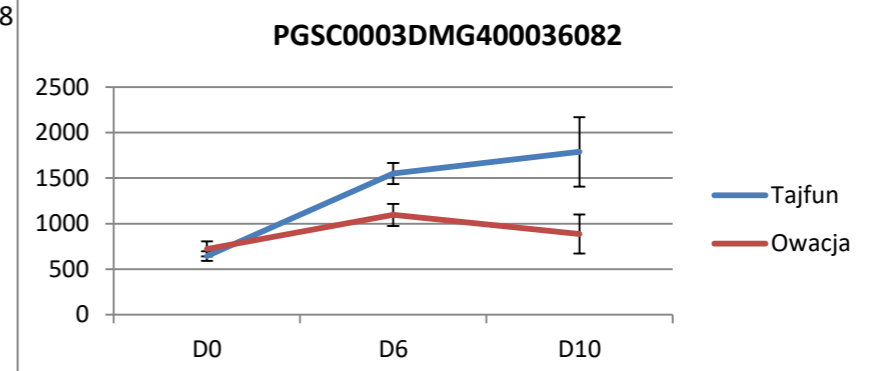

PGSC0003DMG400039484 56 1330,7 15989,3 29,33 377,33 1518 9,17 24,85 5131,9 4,16 388,85 201,37

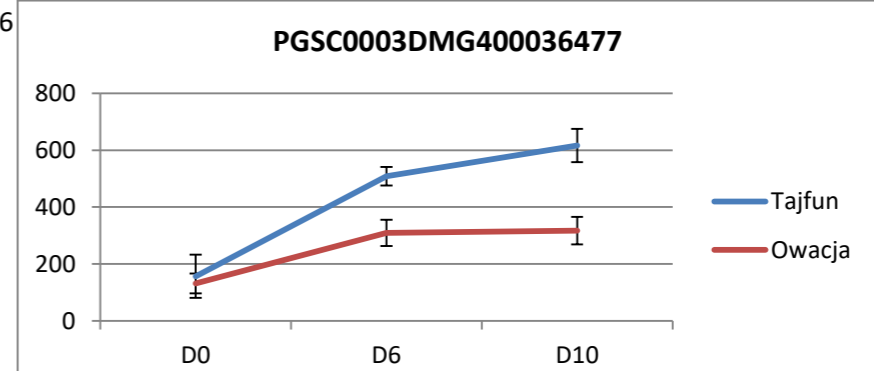

PGSC0003DMG400040535 515,33 1854 1483,33 506 1117,3 690,67 121,99 281,37 383,05 161,7 69,06 72,15

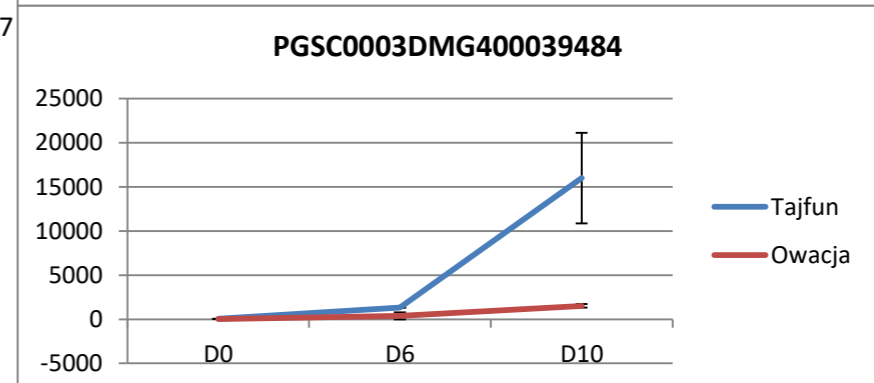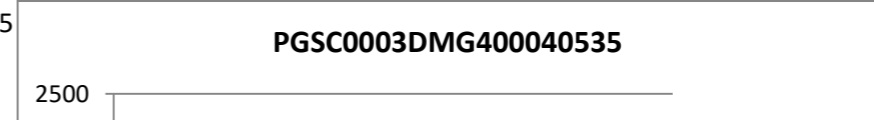

PGSC0003DMG400042481 15,33 228,67 178 7,33 124 58 12,86 54,93 84,45 6,43 41,33 34,18

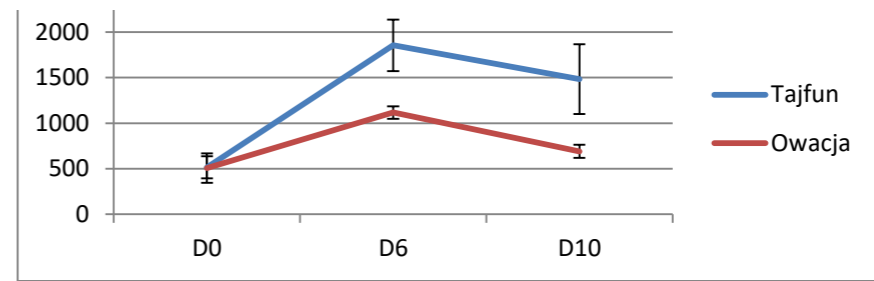

PGSC0003DMG400042481

PGSC0003DMG400046798 5,33 132,67 793,33 0 1,33 0 6,11 82,59 360,95 0 2,31 0

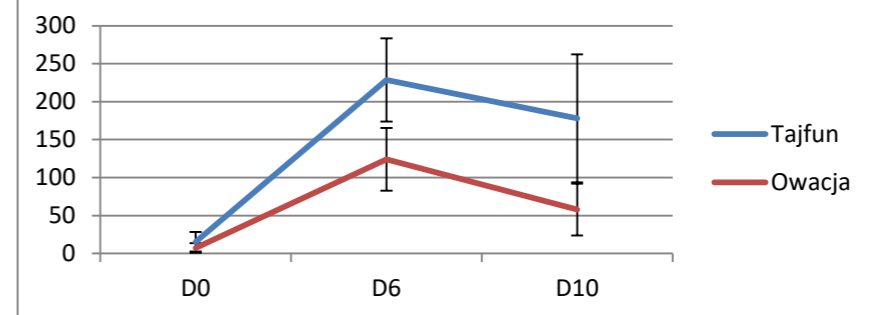

PGSC0003DMG400046798

PGSC0003DMG401001383 144 531,33 677,33 86 331,33 265,33 63,91 51,16 211,27 41,62 17,01 66,25

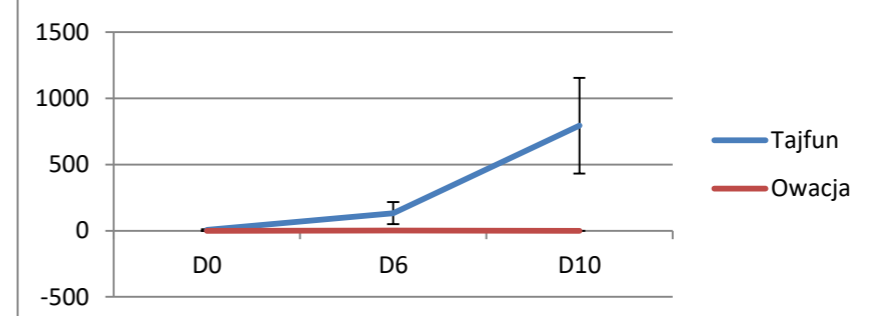

PGSC0003DMG401001383

PGSC0003DMG401001731 477,33 4502,7 20846 600 8024 27720 153,08 589,76 3288,2 202,59 3326,7 2474,55

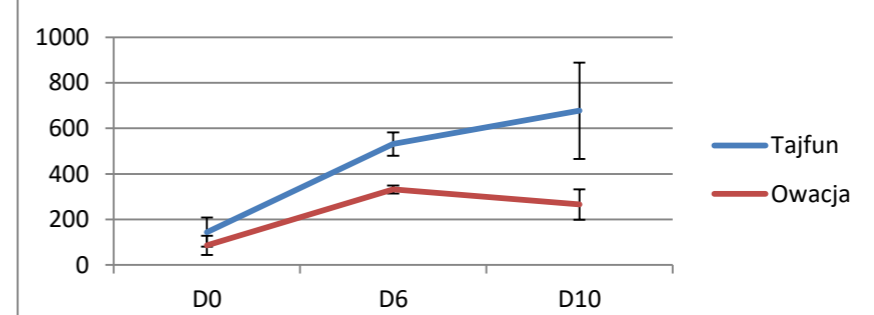

PGSC0003DMG401001731

PGSC0003DMG401002721 254,67 1462,7 2268,67 220 2018 1156 72,23 31,77 340,14 81,02 223,81 264,2

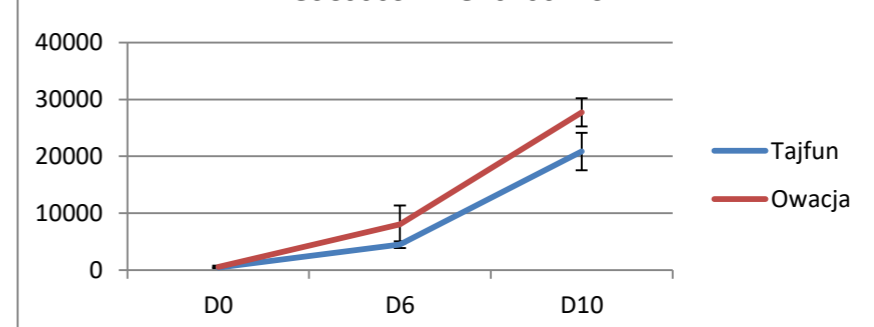

PGSC0003DMG401002721

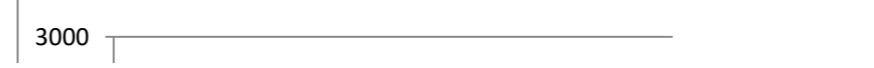

PGSC0003DMG401005570 1379,33 2396 2533,33 1568 3209,3 3660,7 308 199,03 594,65 252,95 366,31 568,02

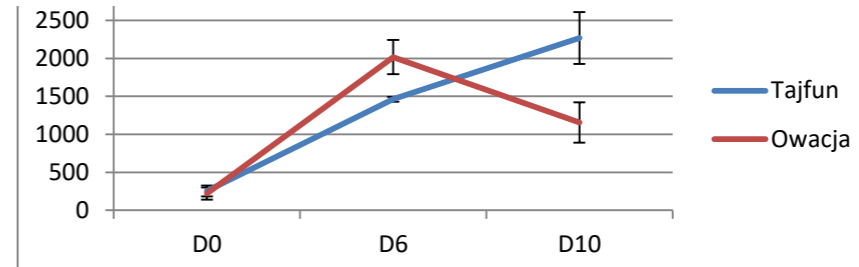

PGSC0003DMG401005570

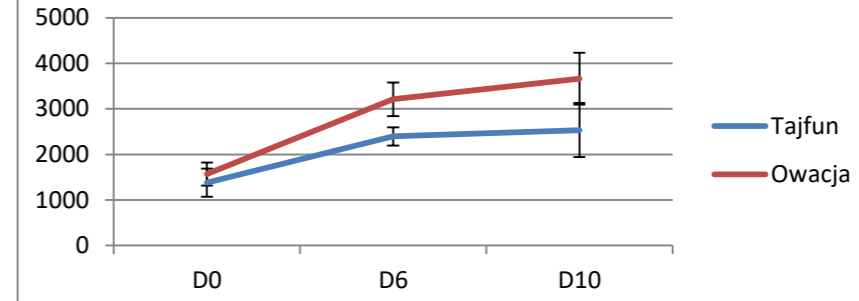

PGSC0003DMG401007333 898,67 2252,7 2804,67 575 1489,3 1132 121,36 453,54 1199,8 296,14 28,73 259,76

PGSC0003DMG401007333

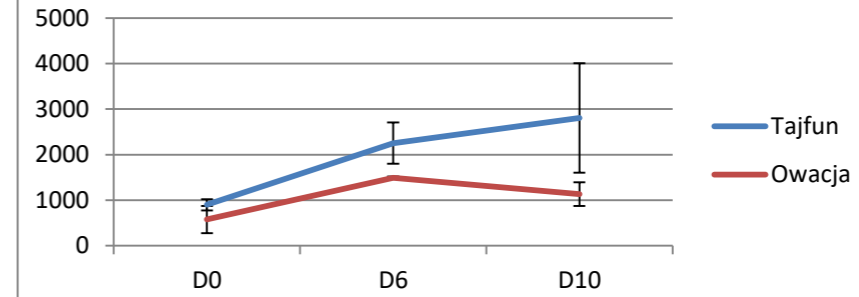

PGSC0003DMG401009344 3658,67 8758,7 12005,3 2639,33 12221 18241 313,69 1019,9 1274,4 897,95 1796,1 3108,91

PGSC0003DMG401009344

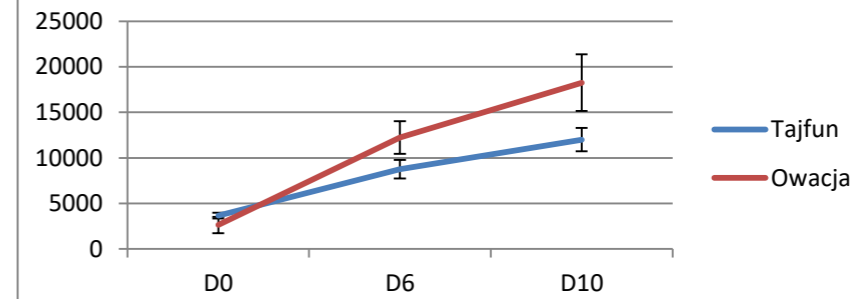

PGSC0003DMG401016404 1342,67 2825,3 3510 1336 4295,3 6460,7 251,61 176,64 326,24 387,26 230,97 502,19

PGSC0003DMG401016404

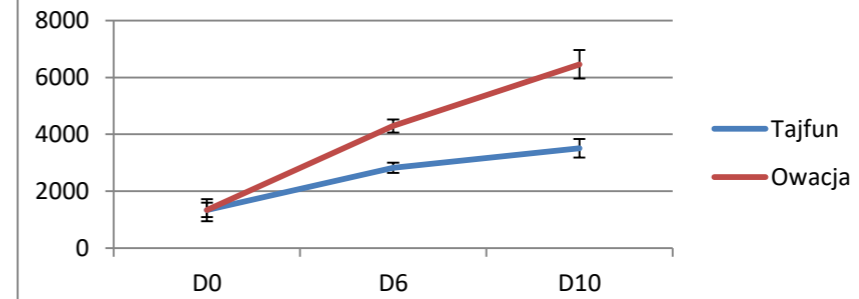

PGSC0003DMG401017754 657,33 1658 2133,33 543,33 1104 1022,7 64,01 231,14 279,4 73,33 55,46 112,33

PGSC0003DMG401017754

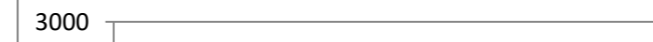



PGSC0003DMG401018962 40 730 322 22,67 326 126,67 21,07 102,43 26,23 3,06 48,66 51,43

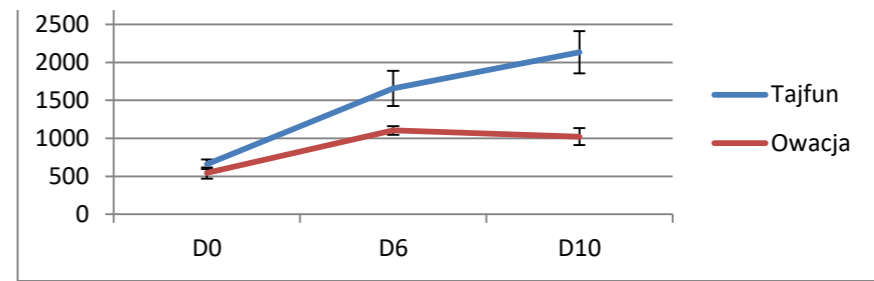

PGSC0003DMG401019352 345 1048 3911,67 409,33 1524 5269 118,2 94,44 1051 142,13 199,87 462,52

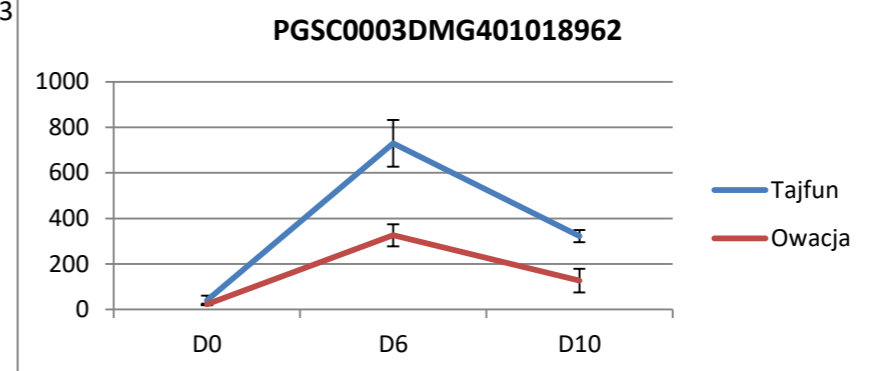

PGSC0003DMG401020509 1318 2838,7 4026 1404 1912,7 1808 106,71 432,96 1498,7 202,67 238,26 423

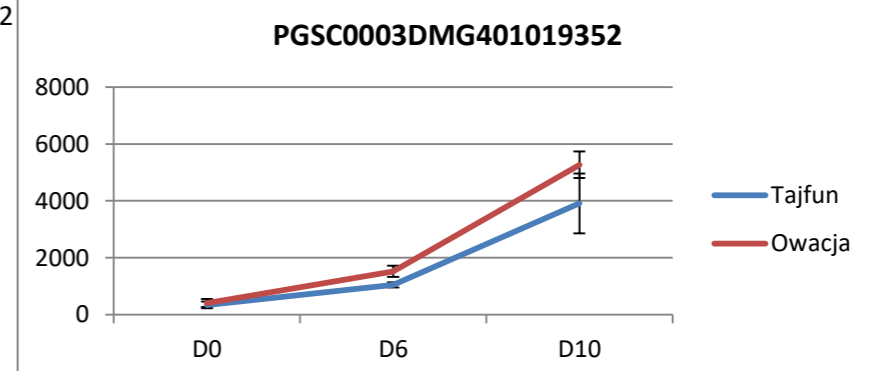

PGSC0003DMG401022202 1370,67 7566,7 15180 1589,33 9966,7 24536 195 1140,9 4635 538,34 911,28 1530,4

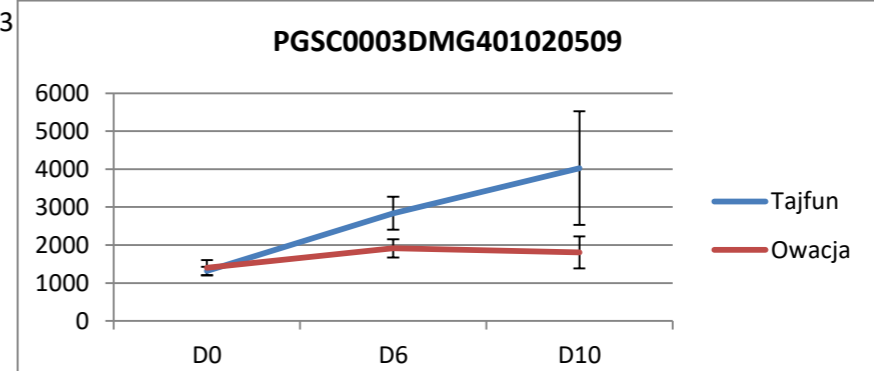

PGSC0003DMG401022285 32 284,67 304,67 18 94,67 54,67 18 80,56 77,11 8,72 24,44 9,02

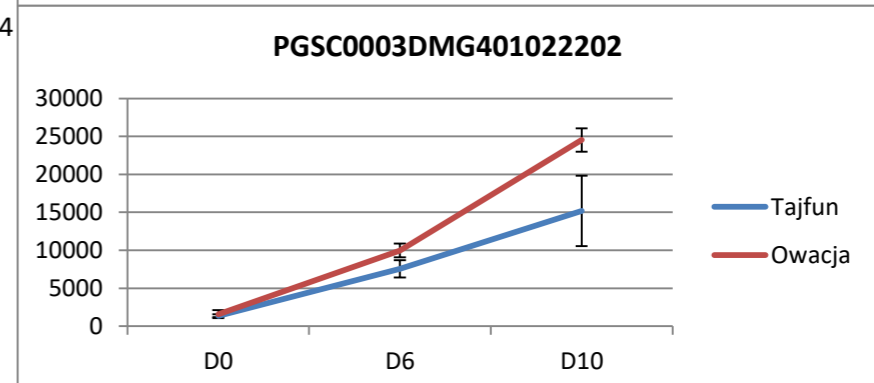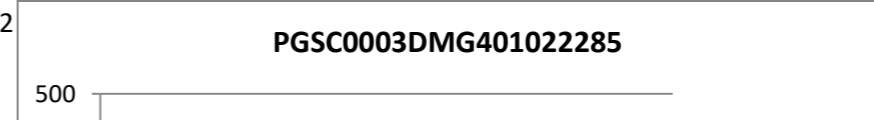

PGSC0003DMG401023104 75,33 237,33 754,33 54,33 140 251 10,07 18,77 108,91 0,58 33,41 68,51

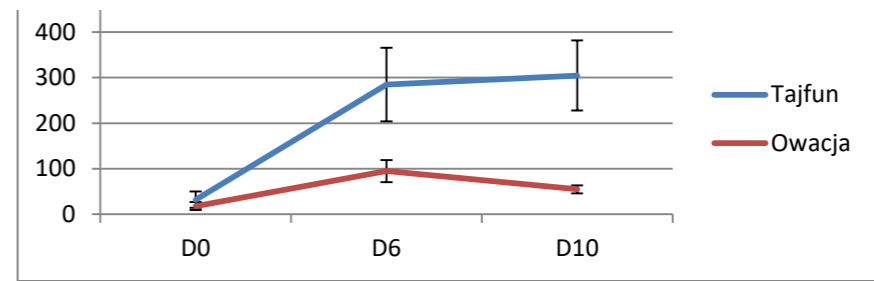

PGSC0003DMG401023104

PGSC0003DMG401026519 127 559 1275,33 111,33 1428,7 2885,3 27,62 265,16 280,4 50,96 451,33 141,74

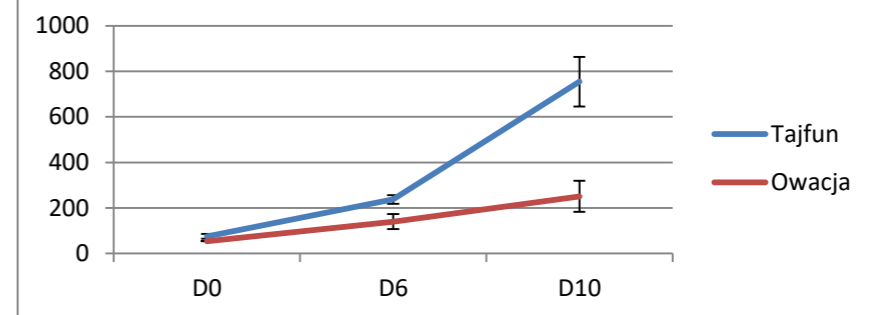

PGSC0003DMG401026519

PGSC0003DMG401027528 302,67 764,67 642 198,67 452,67 260,67 68,07 82,01 150,96 57,98 6,43 71,06

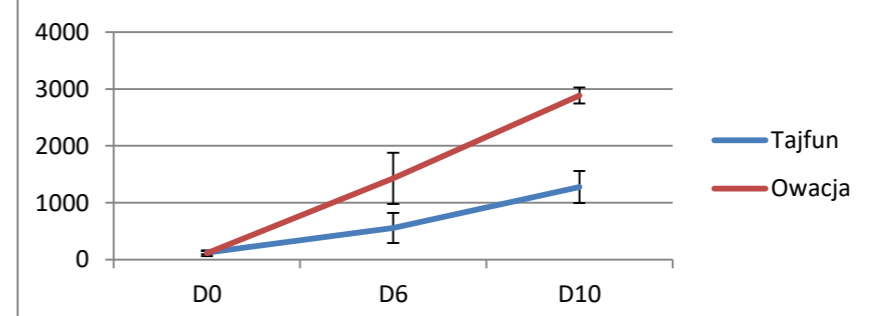

PGSC0003DMG401027528

PGSC0003DMG402001341 2 52,67 290 0,67 100,67 480,67 2 15,14 181,89 1,15 36,02 20,03

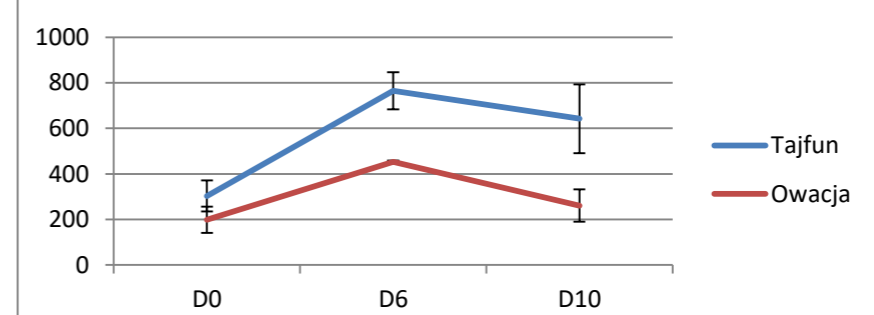

PGSC0003DMG402001341

PGSC0003DMG402001383 140,67 527,33 794,67 130,67 345,33 308,67 30,62 105,08 132,61 18,15 69,9 152,71

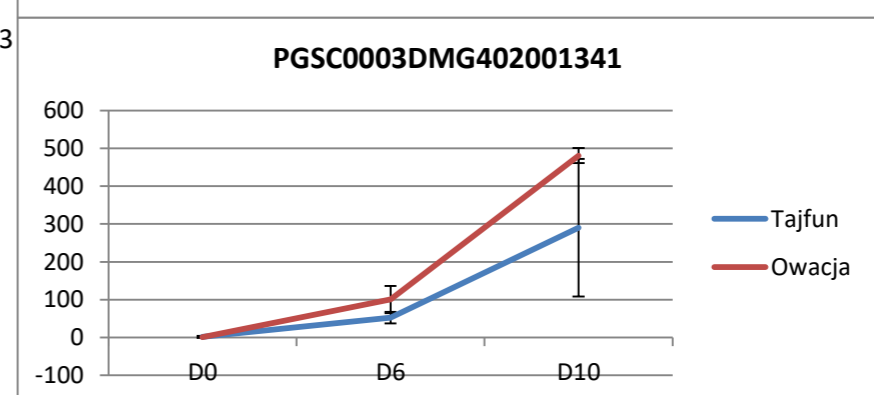

PGSC0003DMG402001383

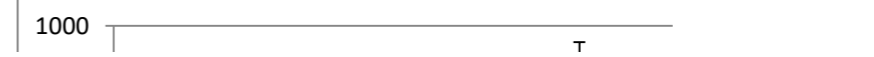

PGSC0003DMG402001494 310,67 2352 965,33 464,67 1462,7 496 42,44 225,31 329,1 184,58 340,74 107,63

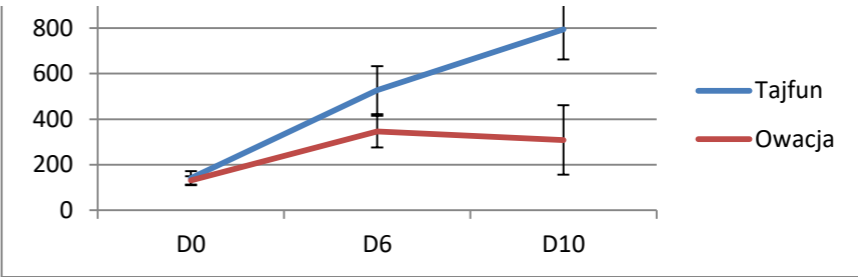

PGSC0003DMG402001494

PGSC0003DMG402008946 324,67 1486 8716,33 395,33 3861,3 19009 173,55 667,89 5267,6 220,55 1037,7 1803,21

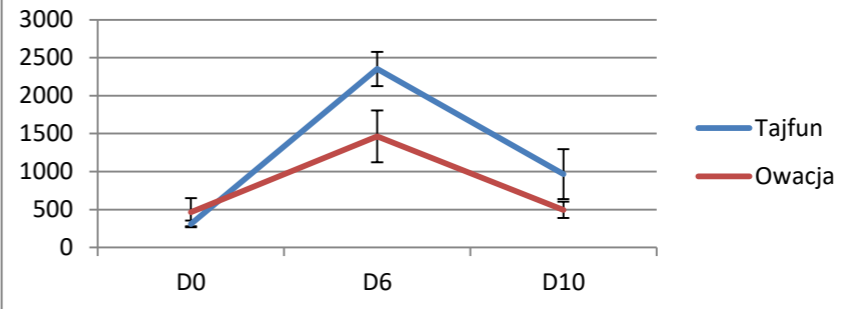

PGSC0003DMG402008946

PGSC0003DMG402008965 10,67 171,33 155,33 0 0 0 18,48 19,73 30,09 0 0 0

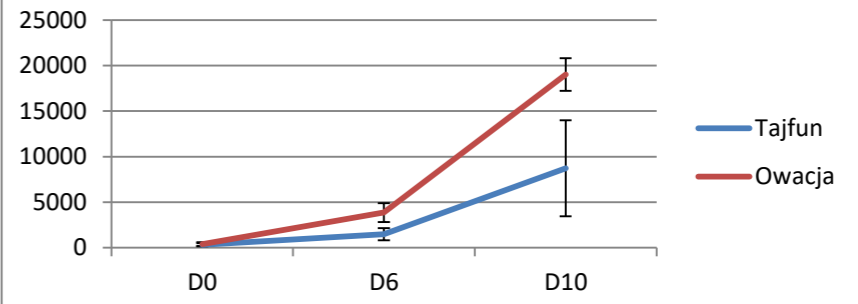

PGSC0003DMG402008965

PGSC0003DMG402009344 812 2082 2950,67 649,33 2986 4200,7 33,29 175,86 715,89 161,05 407,18 795,6

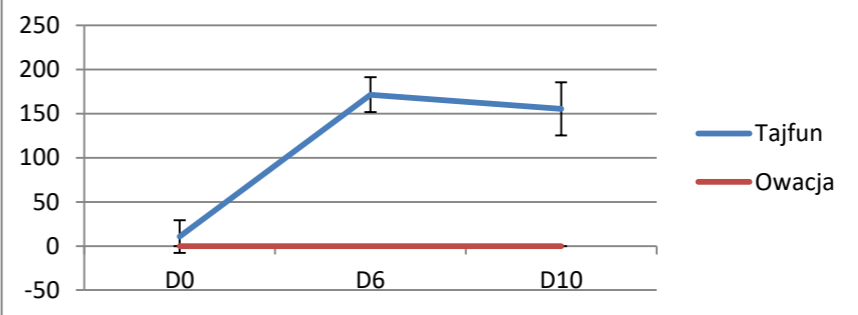

PGSC0003DMG402009344

PGSC0003DMG402010614 26,67 92,67 129 6 0 26,67 25,17 9,45 46,36 10,39 0 46,19

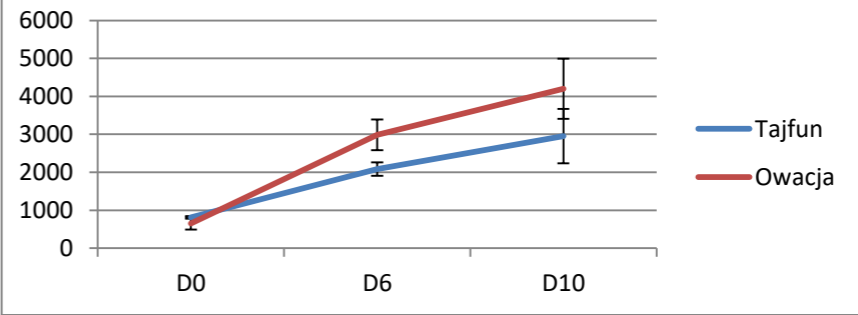

PGSC0003DMG402010614

200

PGSC0003DMG402015894 543 2150 2341,33 744,67 3336 5894 63,41 696,55 1395,3 200,16 349,36 726,7

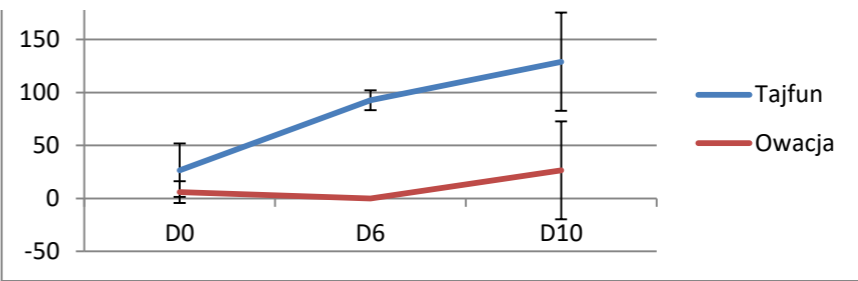

PGSC0003DMG402015894

PGSC0003DMG402016772 288 798 765,33 196,67 474,67 378,67 72,33 135,63 79,03 22,12 173,37 52,55

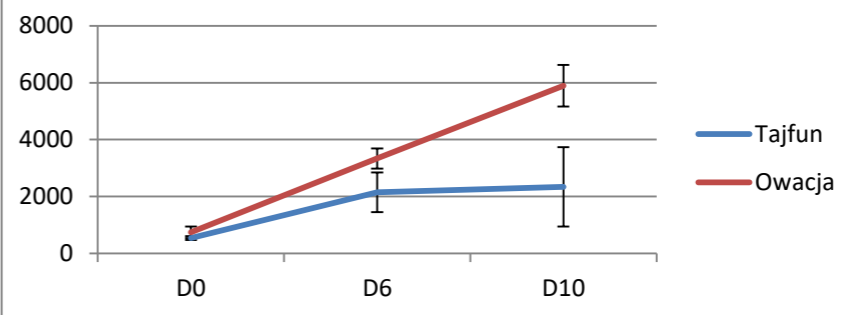

PGSC0003DMG402016772

PGSC0003DMG402019209 12069,7 27454 32368,7 7829,33 18578 15464 4437,3 5393,3 6293,2 1878,2 1004,8 953,41

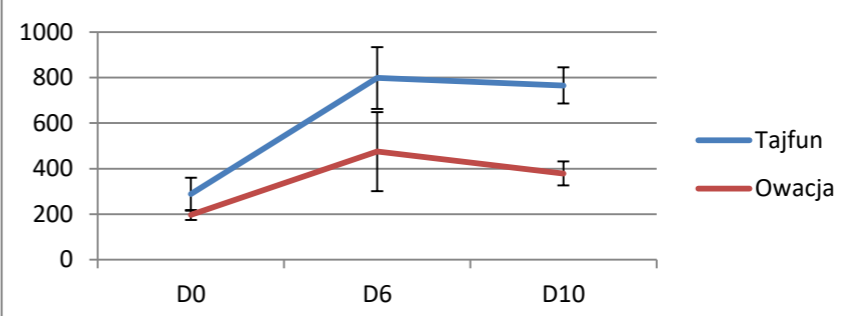

PGSC0003DMG402019209

PGSC0003DMG402023446 1037,33 4141,3 3826 786 5632,7 5606 88,82 940,05 1222,7 240 545,07 535,34

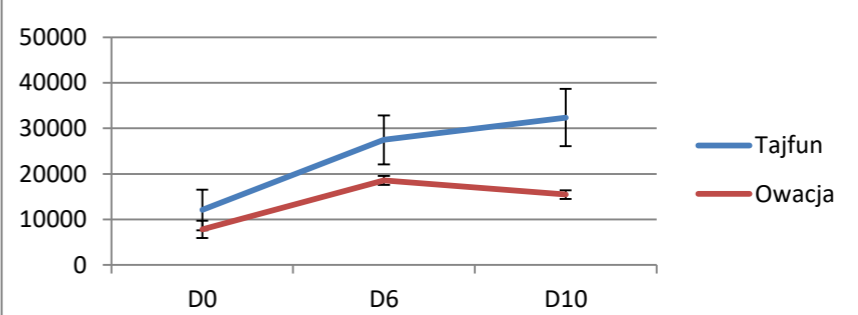

PGSC0003DMG402023446

PGSC0003DMG402027007 2835,33 6021,3 6432 2110,67 4235,3 3504,7 141,88 708,9 795,05 525,09 918,44 549,26

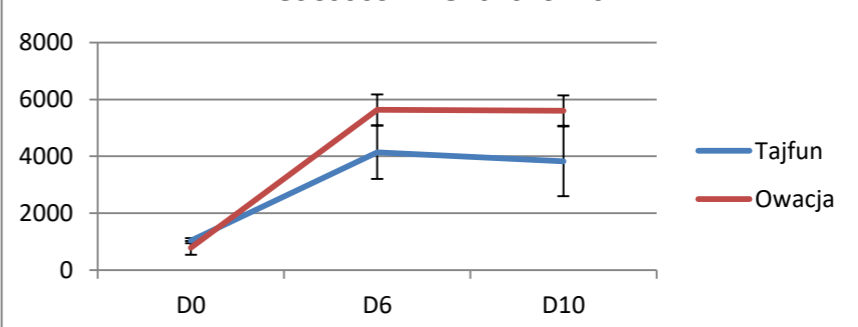

PGSC0003DMG402027007

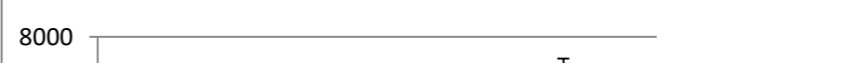

PGSC0003DMG404000594

22 741,67 330 25,33 405,67 26,67 38,11 140,01 70,55 5,03 29,14 12,86

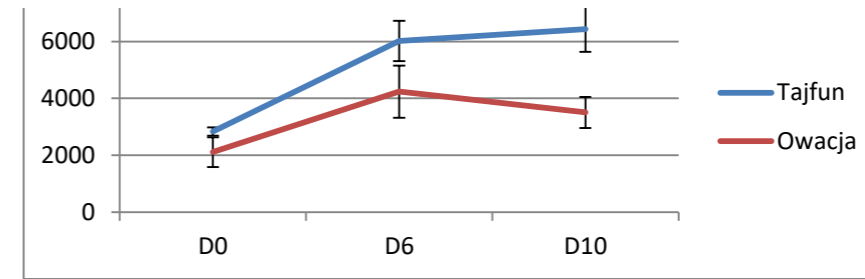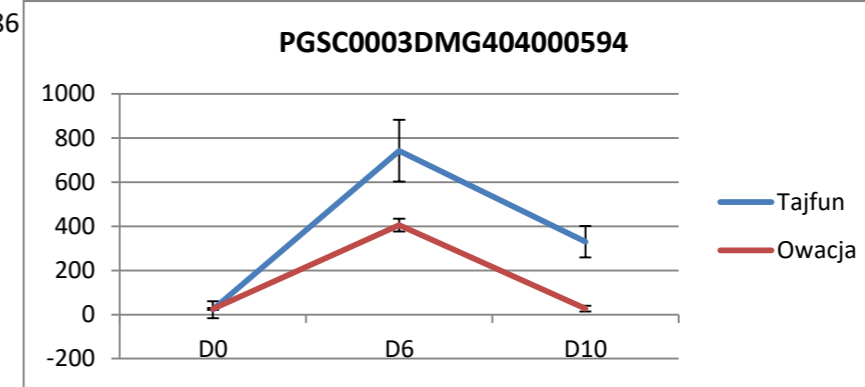

**Table S1** The comparison of normalized number of reads for transcripts derived from genes searched out in the first round of selection (594 genes) during the time course of drought experiment. The gray color indicates the selected genes after the second round of selection.

Mean value of normalised reads per million for selected potato transcripts that were down-regulated in Tajfun comparing to Owacja. Data are shown for days: 0, 6, and 10 of drought experiment and were taken from three biological replicates. SD at D0 was always not statisticly significant ( $P > 0,05$ ), while SD at D6 and D10 were always statisticly significant ( $P < 0,05$ , see also Fig 5). Potato gene accession numbers were taken from Spud DB ([www.potato.plantbiology.msu.edu](http://www.potato.plantbiology.msu.edu)). SD - standard deviations.

| Gene accession numbers | Tajfun reads mean value |        |         | Owacja reads mean value |        |        | Tajfun SD |        |        | Owacja SD |        |        |
|------------------------|-------------------------|--------|---------|-------------------------|--------|--------|-----------|--------|--------|-----------|--------|--------|
|                        | D0                      | D6     | D10     | D0                      | D6     | D10    | D0        | D6     | D10    | D0        | D6     | D10    |
| PGSC0003DMG400000123   | 1708                    | 676,67 | 196,67  | 1796,7                  | 1088   | 358,67 | 454,24    | 212    | 12,7   | 445,23    | 145,59 | 85,7   |
| PGSC0003DMG400000159   | 7956                    | 2288   | 825     | 6964                    | 1648   | 222,67 | 608,17    | 260,18 | 412,81 | 2742      | 142,67 | 39,11  |
| PGSC0003DMG400000180   | 3414                    | 919,67 | 628,67  | 3034,7                  | 1398,7 | 1026   | 668,44    | 80,34  | 54,45  | 922,19    | 132,81 | 75,18  |
| PGSC0003DMG400000185   | 4746,7                  | 2900   | 2795,33 | 4888,7                  | 3986,7 | 4664   | 1252,6    | 326,23 | 376,86 | 1534,7    | 263,95 | 765,32 |
| PGSC0003DMG400000187   | 1112                    | 632    | 432     | 1488,7                  | 1380,7 | 1347,3 | 175,86    | 100,18 | 66,09  | 340,24    | 409    | 98,11  |

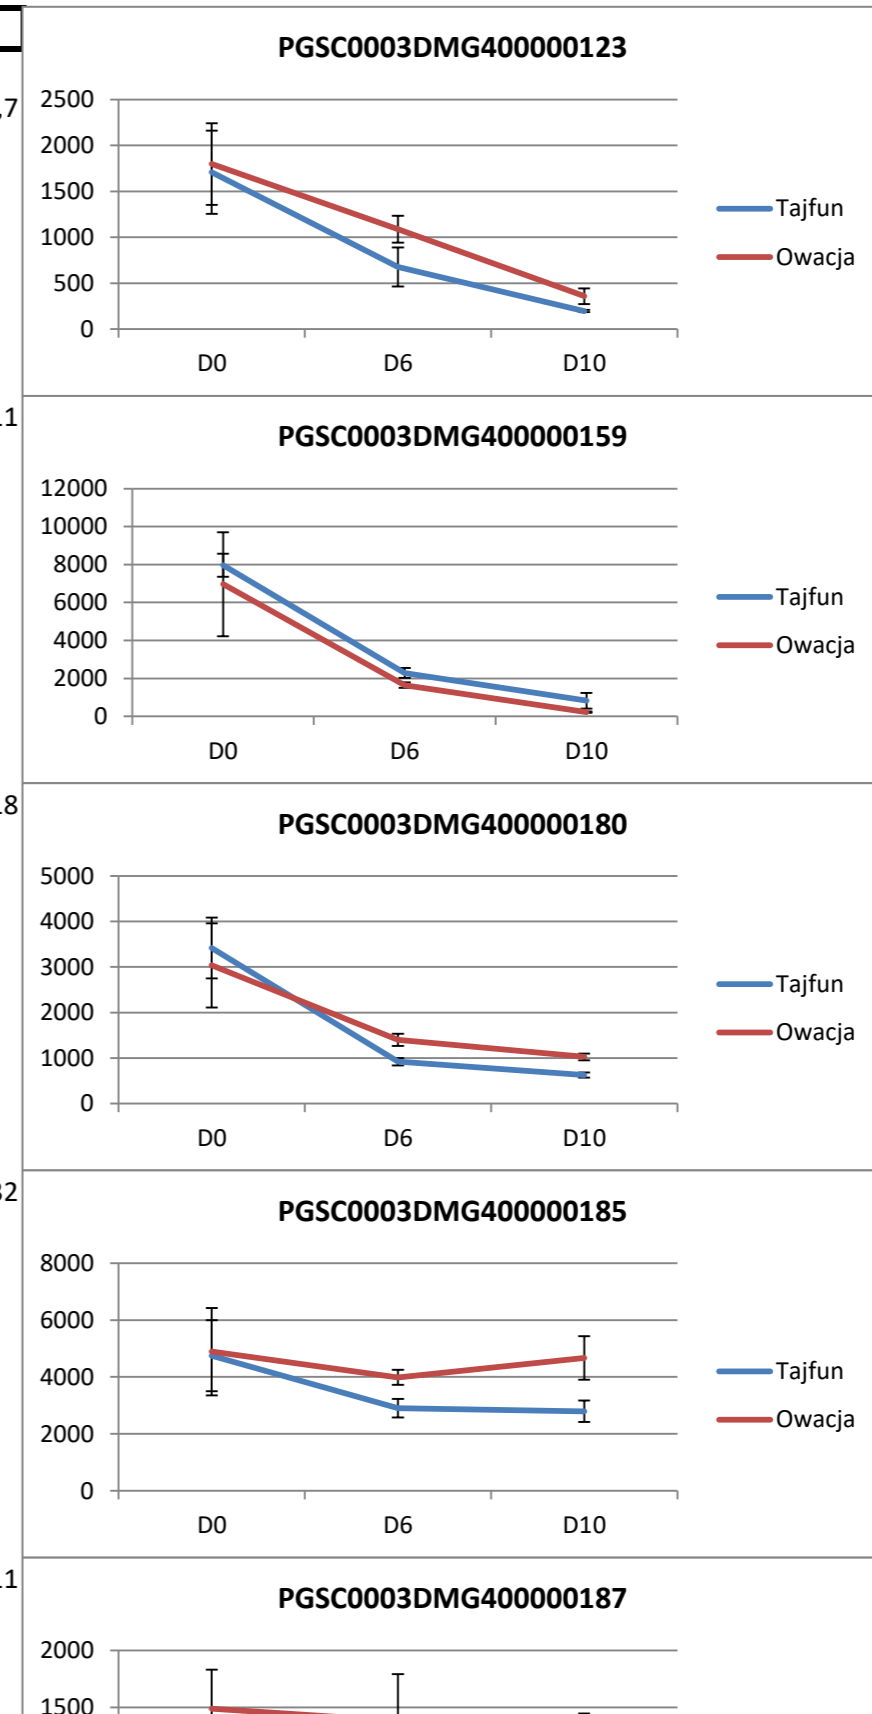

PGSC0003DMG400000325 3892 776 538,67 1900 278 112 1400,6 183,61 318,85 394,99 137,13 16,37

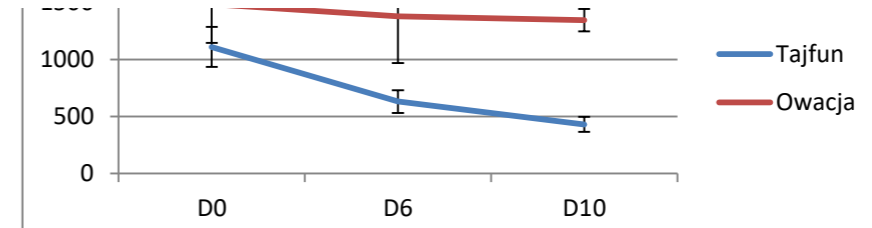

PGSC0003DMG400000325

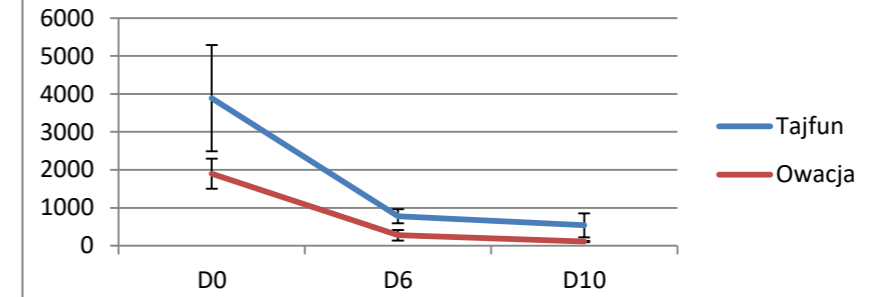

PGSC0003DMG400000327

PGSC0003DMG400000327 13936 5042,7 2732 8923,3 3185,3 576,67 3795 1256,4 1168,08 2139,9 469,9 145,69

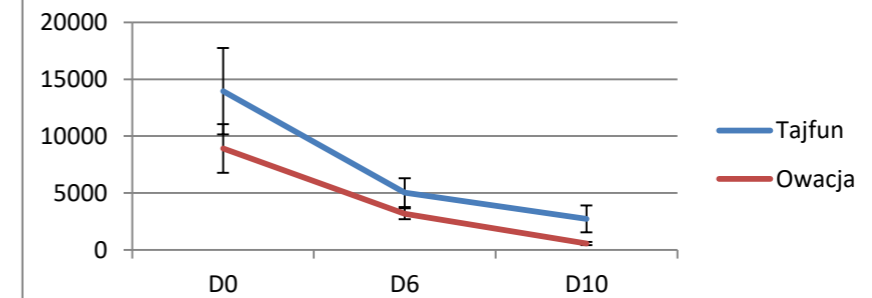

PGSC0003DMG400000545

PGSC0003DMG400000545 589,33 165,33 119,33 359,33 384 826,67 378,64 36,9 55,22 95,63 129,29 195,53

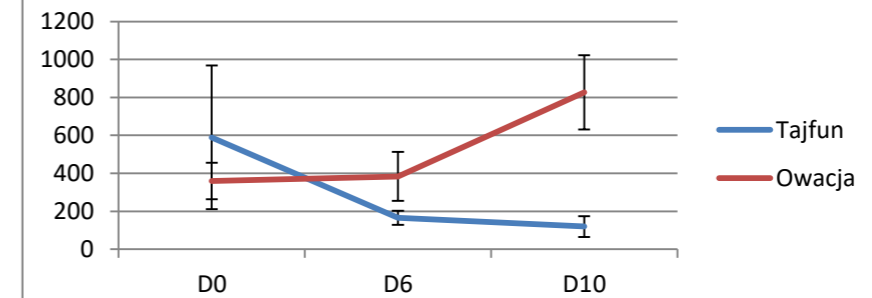

PGSC0003DMG400000640

PGSC0003DMG400000640 1956,7 1302,7 540 2285,3 1902 883,33 208,82 58,01 29,05 721,23 126,76 155,72

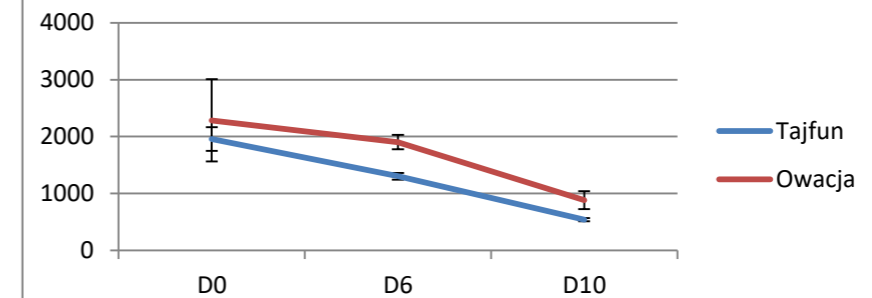

PGSC0003DMG400000746

PGSC0003DMG400000746 166,67 14,67 75,33 206 110 262 39,46 13,61 1,15 64,37 26,15 12,49

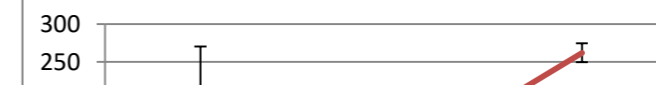

PGSC0003DMG40000988 677,33 292 151,33 412 109,33 43,33 134,84 89,6 50,96 72,33 35,8 23,09

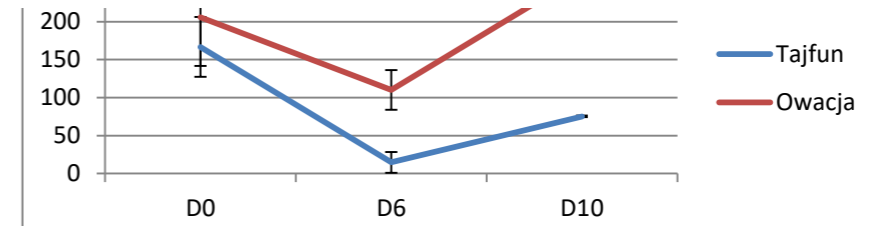

PGSC0003DMG40000988

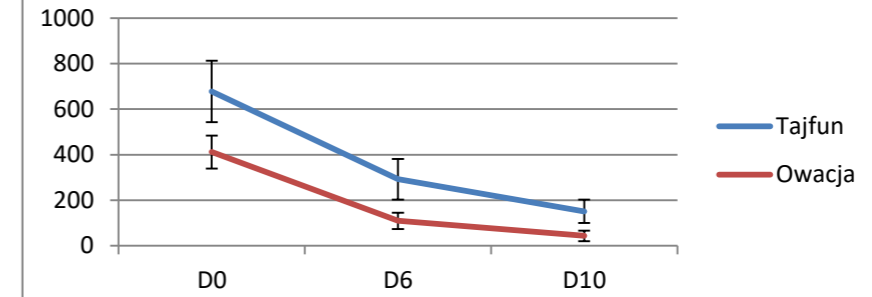

PGSC0003DMG400001368 8867,3 5782 4345,33 9539,3 9451,3 12827 1859,2 1416,2 1579,16 3656,5 1897,76 521,92

PGSC0003DMG400001368

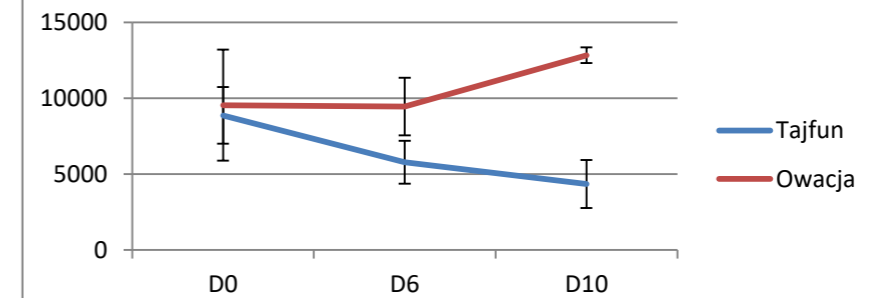

PGSC0003DMG400001570 120355 72361 46061,3 104264 96101 69657 11888 13591 21455,6 48156 9750,84 4343

PGSC0003DMG400001570

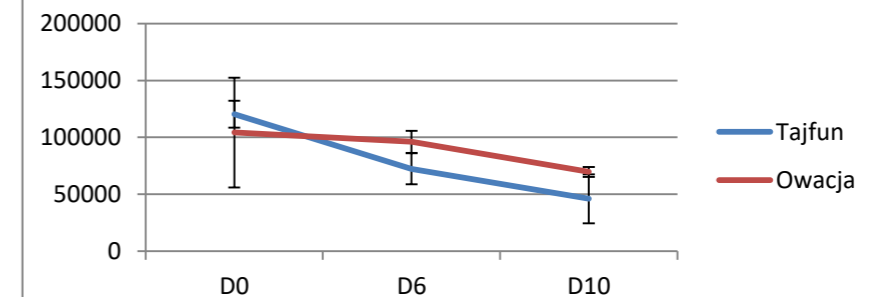

PGSC0003DMG400001576 722,67 344 306,67 1047,3 172 155,33 79,1 22,72 12,22 390,01 5,29 25,32

PGSC0003DMG400001576

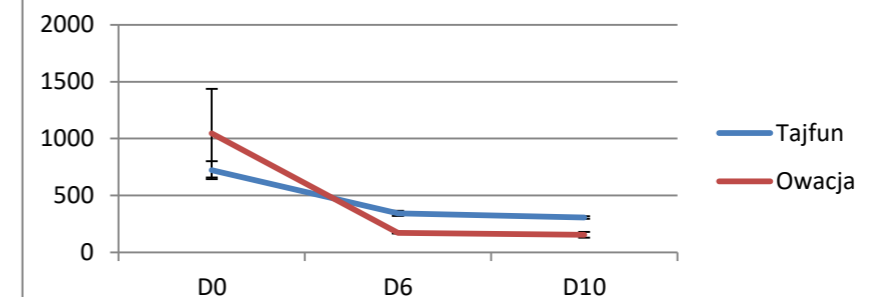

PGSC0003DMG400001589 408,67 260,67 39,33 336 90,67 0 75,16 37,22 34,08 81,46 21,2 0

PGSC0003DMG400001589

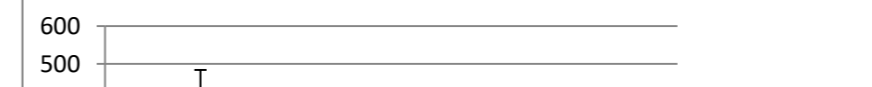



PGSC0003DMG400001684 782 226 193,33 586,67 112,67 340,67 41,62 51,07 43,47 110,44 28,94 95,51

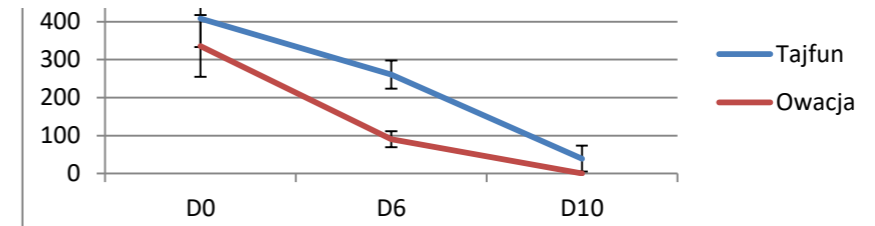

PGSC0003DMG400001684

PGSC0003DMG400002233 2858,7 1894 1450,67 2757,3 3051 2364 627,93 464,68 343,7 635,08 592,91 279,65

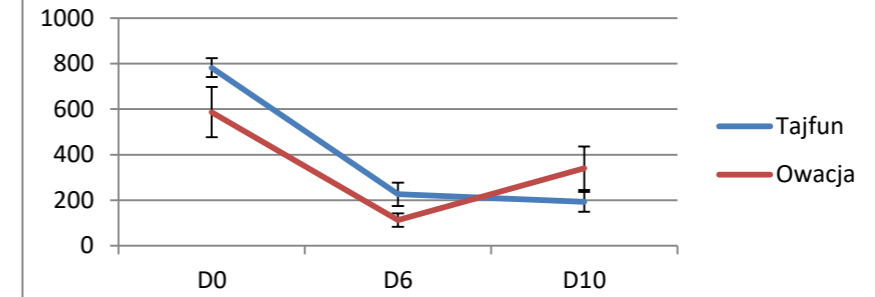

PGSC0003DMG400002233

PGSC0003DMG400002420 401,33 40 28 216,67 4,67 2 151,23 22,54 22,54 93,84 4,16 3,46

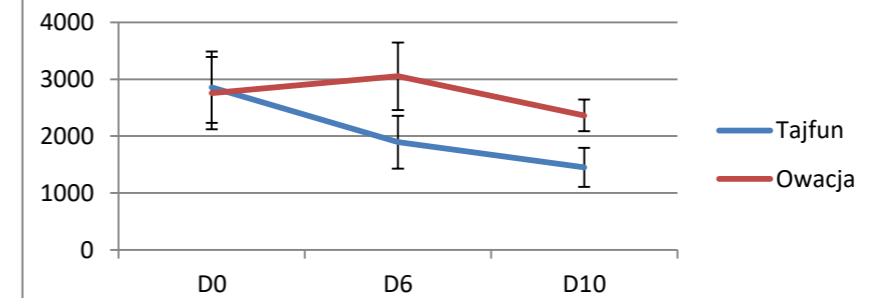

PGSC0003DMG400002420

PGSC0003DMG400002787 283,33 68,67 0 238,67 20 11,33 112,38 30,09 0 65,43 9,17 7,57

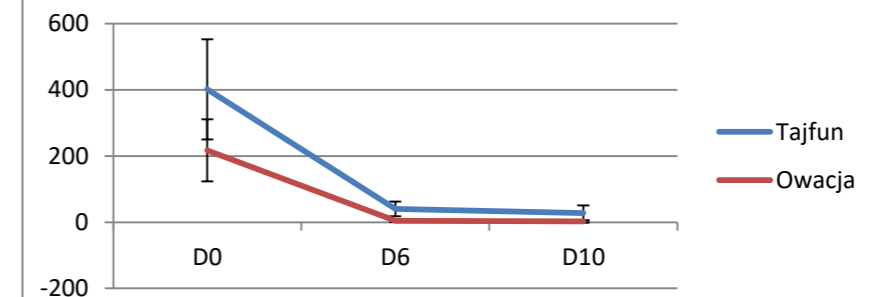

PGSC0003DMG400002787

PGSC0003DMG400002789 1636,7 800,67 534,67 1191,3 1647 738,67 835,38 158,57 46,06 606,57 506,44 161,77

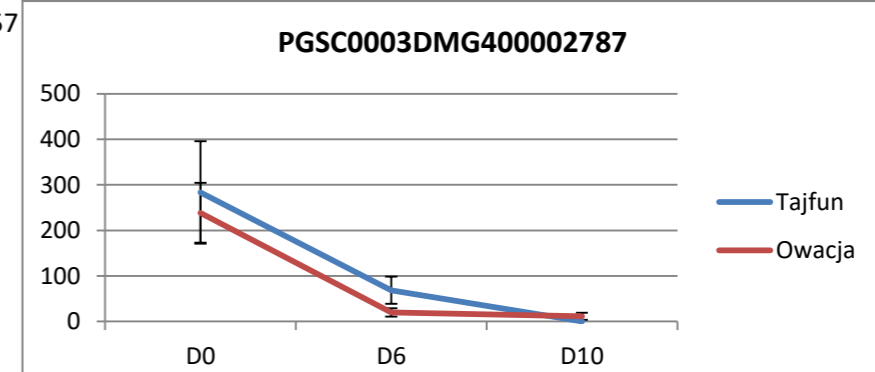

PGSC0003DMG400002789

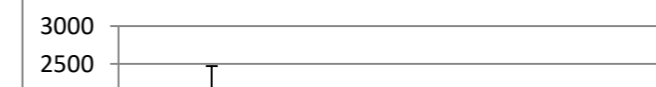

PGSC0003DMG400002883 2060 367,33 144,67 1444,7 149,33 0 216,04 94,45 73,11 472,57 128,02 0

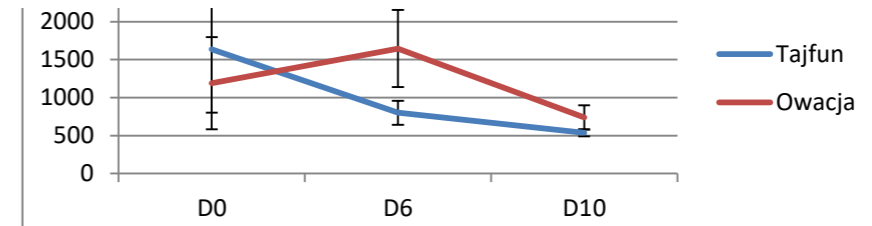

PGSC0003DMG400002883

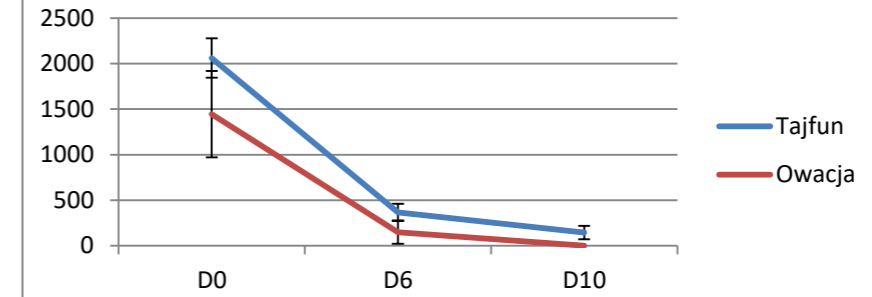

PGSC0003DMG400003036 440 254 260 322,67 135,33 116 34,7 25,53 106,71 34,43 9,87 15,87

PGSC0003DMG400003036

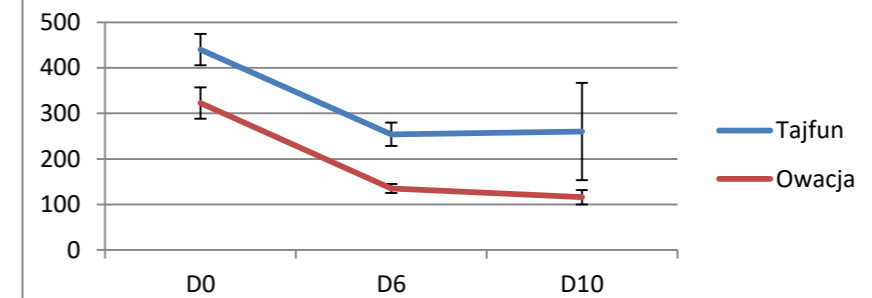

PGSC0003DMG400003155 2596 1995,3 1227,33 2892 2748 2026 673,57 313,42 173,6 589,12 102,84 357,66

PGSC0003DMG400003155

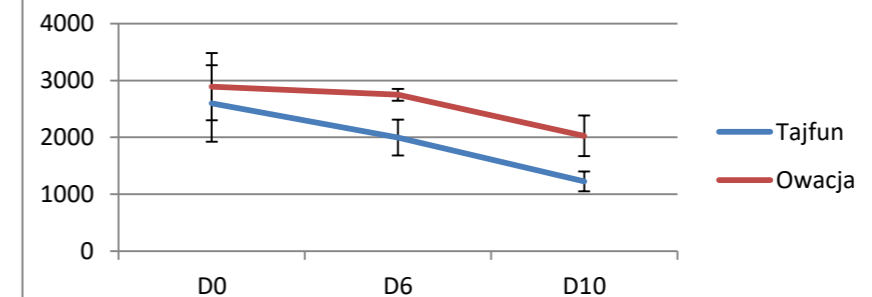

PGSC0003DMG400003774 1556,7 587,33 554,33 1622,7 322,67 153,33 429,72 205,23 206,34 394,68 11,37 77,31

PGSC0003DMG400003774

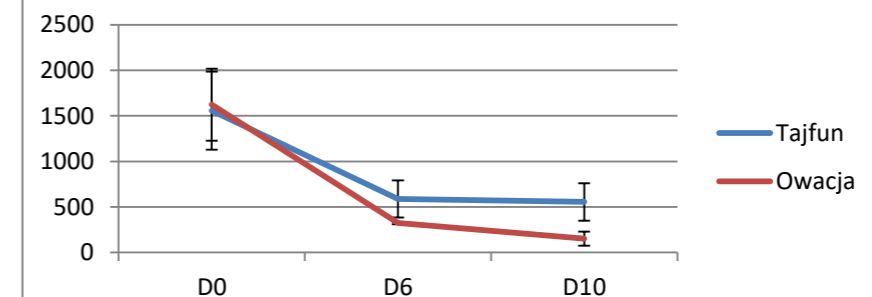

PGSC0003DMG400003788 3730,7 48 22 3820,7 186 122 1484,3 6,93 8,72 1337,9 54,37 19,7

PGSC0003DMG400003788

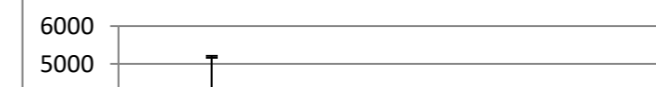

**PGSC0003DMG400003887** 4434,7 2500,7 2704 4206,7 4562 8744 682,56 564,9 1389,91 859,24 1739,55 1267,4

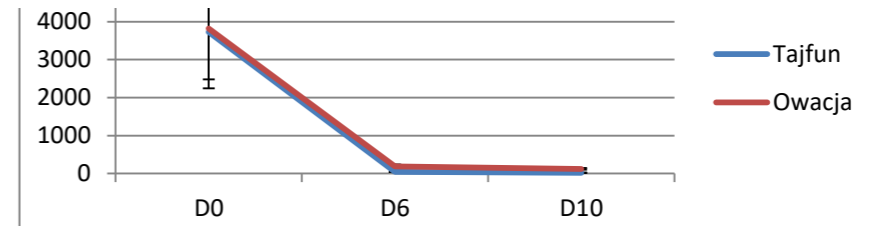

**PGSC0003DMG400003887**

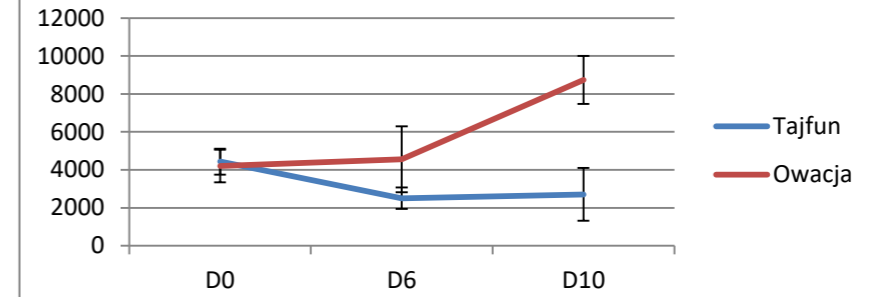

**PGSC0003DMG400003901** 236,67 135,33 70,67 132 55,33 10 105,08 33,25 16,77 68,79 17,93 5,29

**PGSC0003DMG400003901**

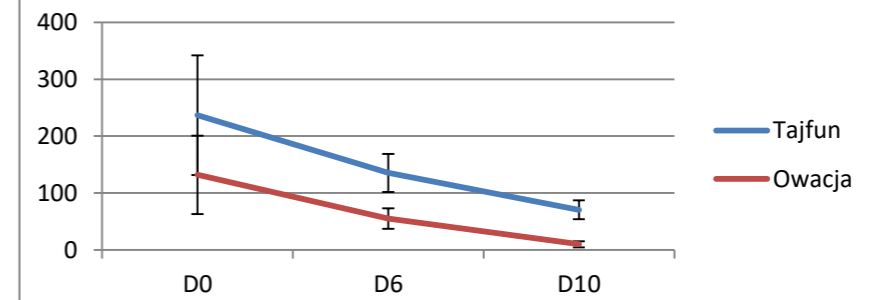

**PGSC0003DMG400003913** 1960 359,33 148 2507,3 720,67 237,33 256,02 43,75 80,3 289,17 143,87 45,8

**PGSC0003DMG400003913**

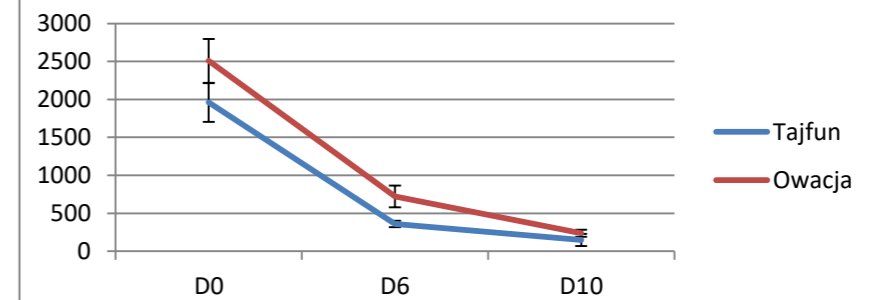

**PGSC0003DMG400004251** 529,67 44 0 557,67 196,67 112,67 224,04 38,57 0 129 30,55 3,06

**PGSC0003DMG400004251**

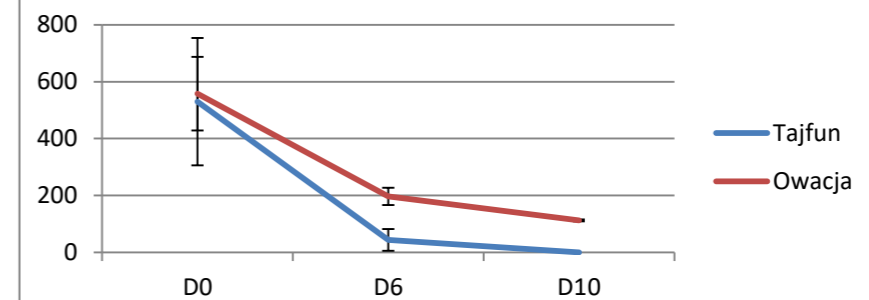

**PGSC0003DMG400004601** 1237,3 200,33 185 840,67 324,33 377,33 187,79 28,57 131,27 162,86 65,5 70,04

**PGSC0003DMG400004601**

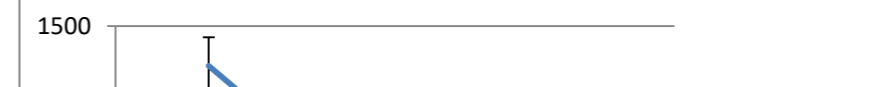

PGSC0003DMG400004639 23225 3264 2724 13637 1503,3 720 6220,2 936,78 1466,43 5047,6 670,81 240,9

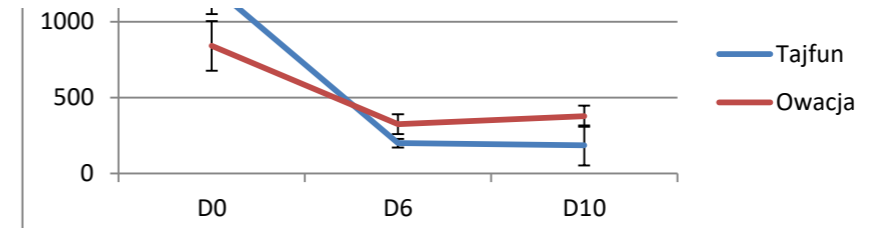

PGSC0003DMG400004639

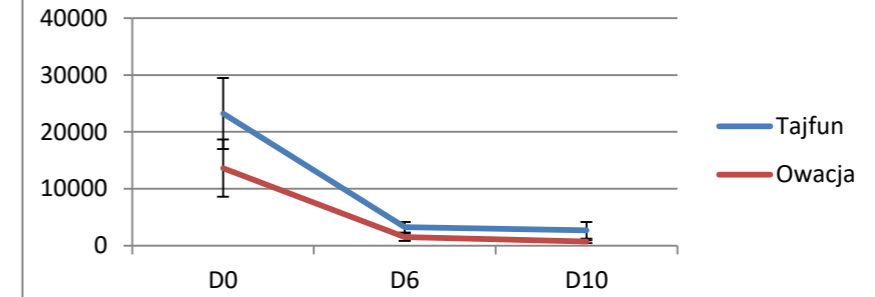

PGSC0003DMG400004708 559,33 200,67 47,33 344,67 330 150,67 71,45 40,61 41,3 88,75 67,91 88,82

PGSC0003DMG400004708

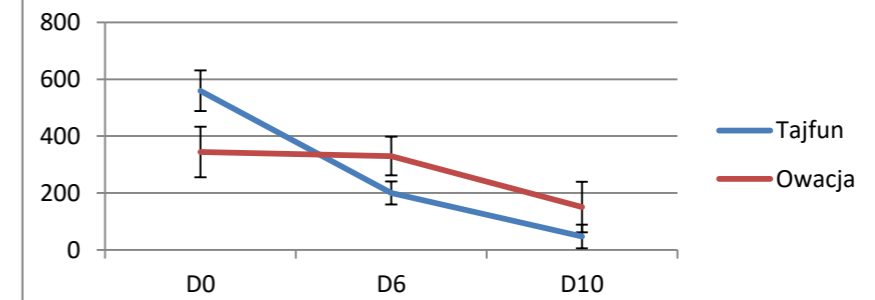

PGSC0003DMG400004842 240 22,67 0 164 0 86 18,33 23,01 0 51,42 0 21,63

PGSC0003DMG400004842

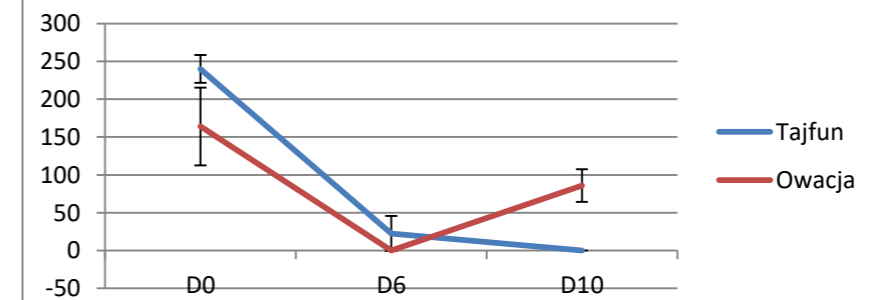

PGSC0003DMG400005031 424,67 168 139,33 516,67 408 374 122,87 23,07 12,7 173,51 45,74 57,17

PGSC0003DMG400005031

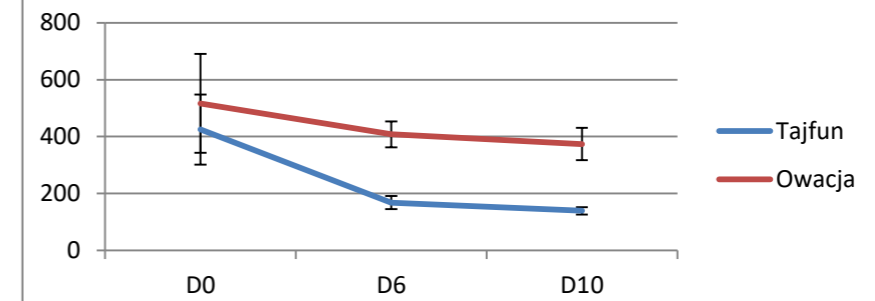

PGSC0003DMG400005035 808 507,33 305,33 754,67 773,33 1090,3 170,04 3,06 68,16 225,31 57,35 145,79

PGSC0003DMG400005035

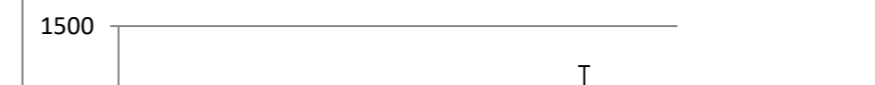

PGSC0003DMG400005214 2212 1449,3 198 2108,7 832,67 432 496,89 339,04 85,35 555,73 254,06 110,92

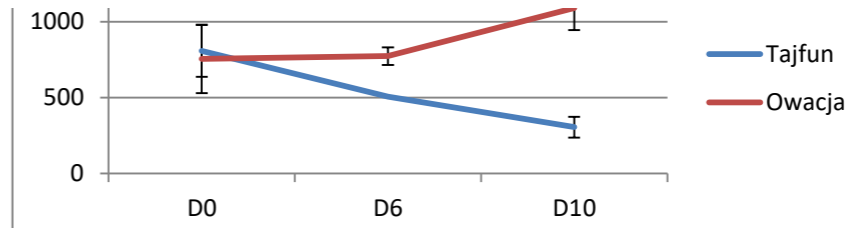

PGSC0003DMG400005214

PGSC0003DMG400005361 6133,3 4442,7 2120,67 5646 3188 3971,3 297,2 213,85 120,21 1337,5 875,17 914,43

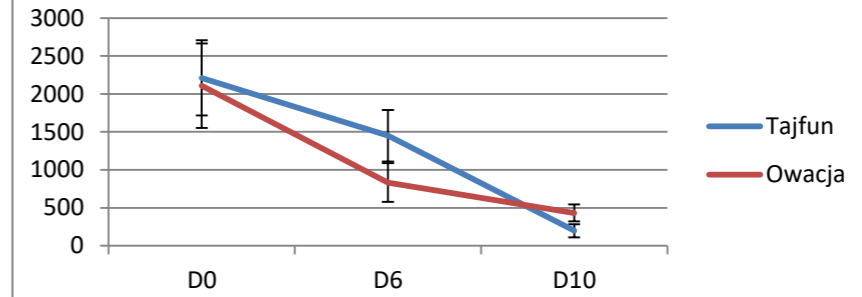

PGSC0003DMG400005361

PGSC0003DMG400005409 1331,3 230,67 108,67 812,67 70 40 505,06 39,21 43 477,41 36,06 14,42

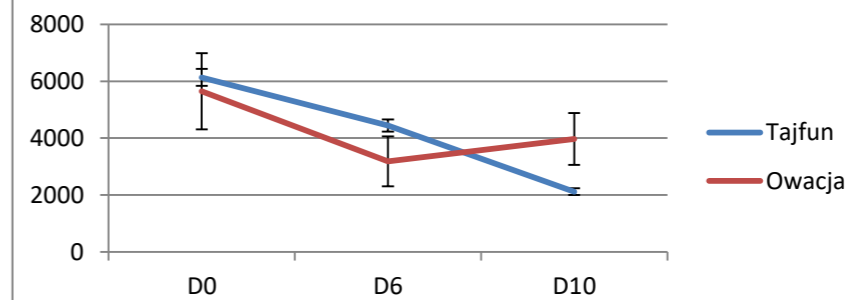

PGSC0003DMG400005409

PGSC0003DMG400005633 13475 2504,7 601,33 12495 1345,3 77,33 3440,8 304,54 471,99 1928,4 206,03 63,57

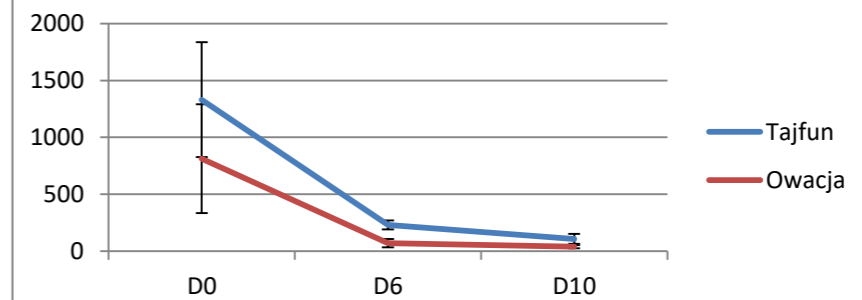

PGSC0003DMG400005633

PGSC0003DMG400005661 875,33 576 598,67 754 375,33 1188 148,44 90,8 255,91 84,07 144,46 209,98

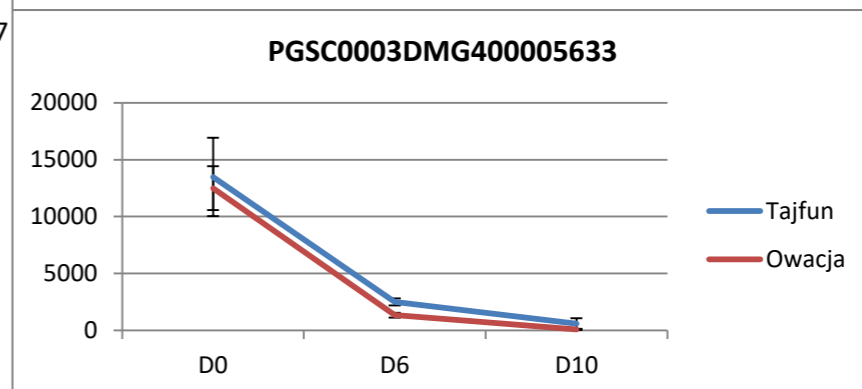

PGSC0003DMG400005661

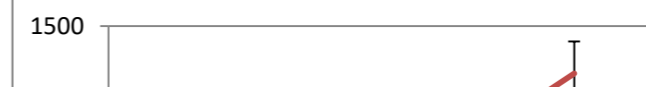

PGSC0003DMG400005936 1798 757,33 295,33 1093,3 458 154 600,36 56,01 50,65 430,55 88,45 47,29

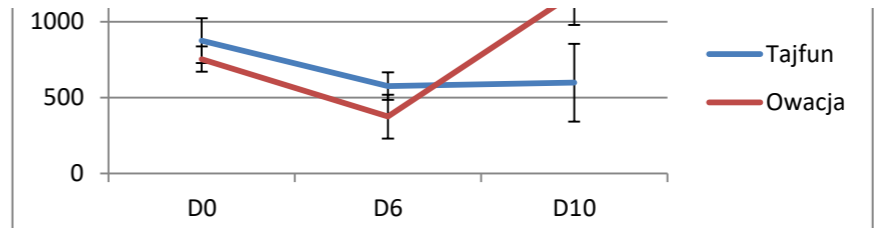

PGSC0003DMG400005936

PGSC0003DMG400006508 3449,3 1869,3 722,67 2346,7 1085,3 367,33 401,52 21,39 103,47 158,07 134,48 49,57

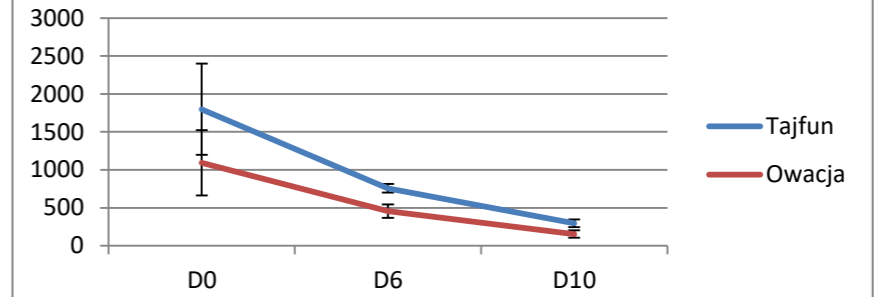

PGSC0003DMG400006508

PGSC0003DMG400006770 2380,7 1597,7 1660 2681 2409 2439,3 441,41 321,57 294,2 194,87 390,83 195,36

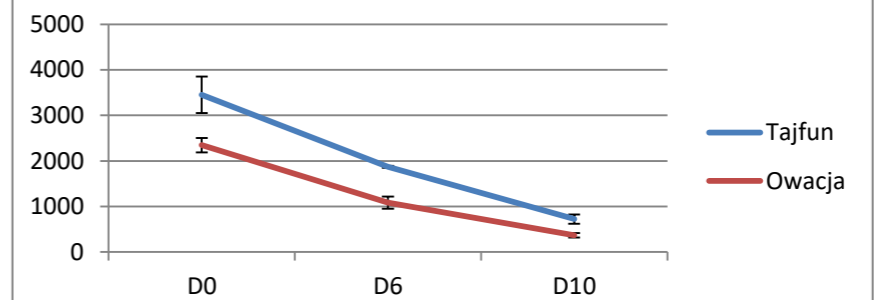

PGSC0003DMG400006770

PGSC0003DMG400006828 13247 11855 9302,67 9172 8346,3 4497,3 3569,4 1341,4 1914,51 2734,3 417,49 614,39

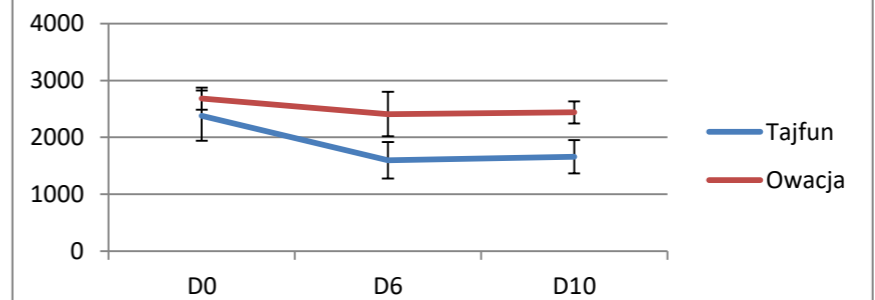

PGSC0003DMG400006828

PGSC0003DMG400006913 1040 346 367,33 1402 2497,3 2618 300,75 60,53 78,01 271,91 115,11 581,57

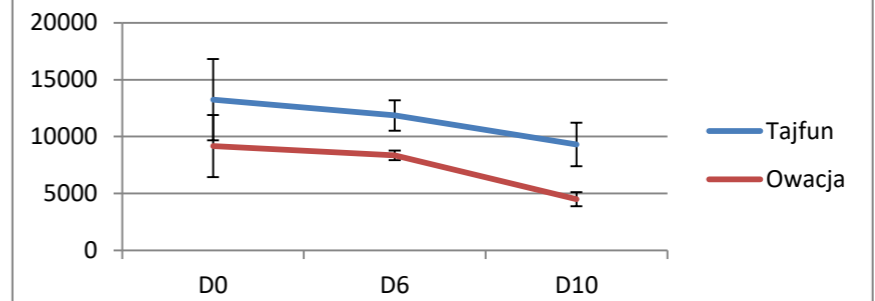

PGSC0003DMG400006913

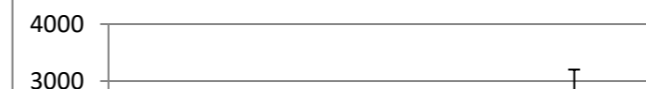

PGSC0003DMG400007054 647 389,67 318 825,33 617 605 197,76 45,63 48,5 27,3 80,29 61,83

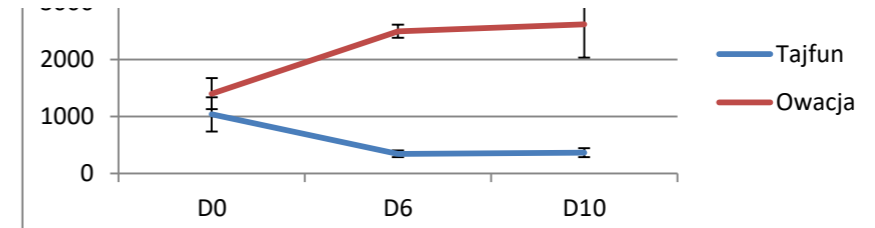

PGSC0003DMG400007054

PGSC0003DMG400007058 12421 4086,3 4263,33 8113 5406,7 6992,3 2282,6 888,32 1191,68 2044,3 351,19 1265,1

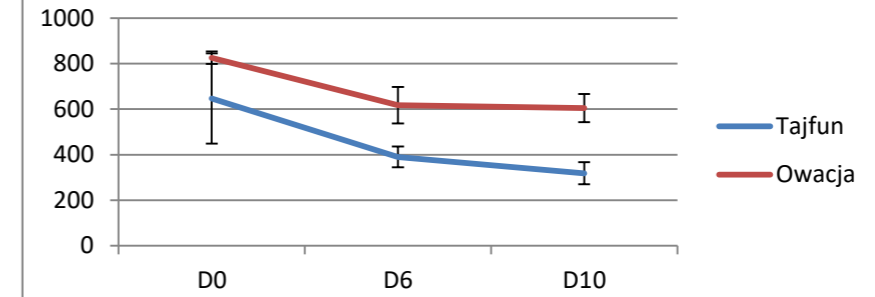

PGSC0003DMG400007058

PGSC0003DMG400007374 4502,7 358,67 1636,67 4144 768 15446 1076,5 106,81 2089,71 1035,6 86,81 3415

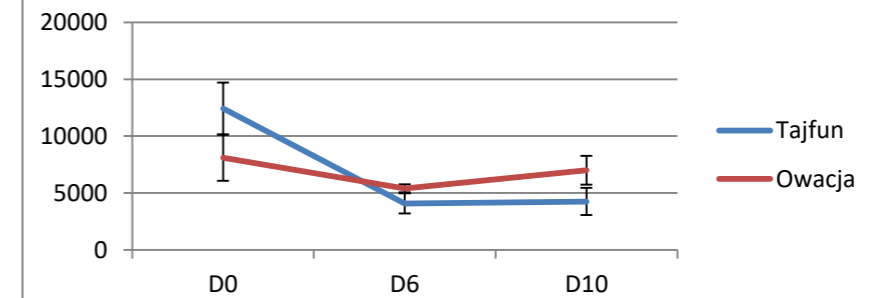

PGSC0003DMG400007374

PGSC0003DMG400007427 291,33 80 97,33 339,33 315,33 366 31,77 38,16 35,8 118,02 27,01 83,74

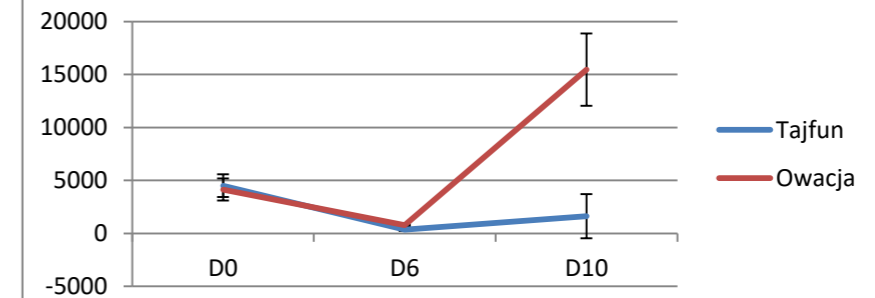

PGSC0003DMG400007427

PGSC0003DMG400007518 55916 31276 41574,7 70563 49231 115515 1705,4 4086 19781,6 16712 6348,26 20018

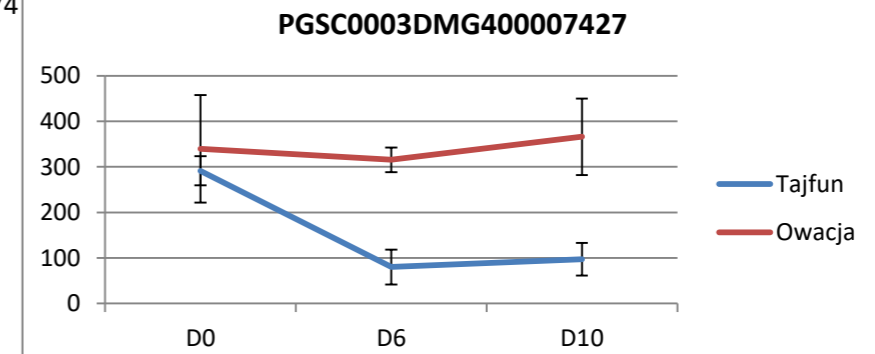

PGSC0003DMG400007518

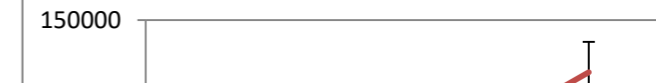

PGSC0003DMG400007678 194 41,33 42 149 88,67 4 22,54 15,01 32,74 51,1 15,53 6,93

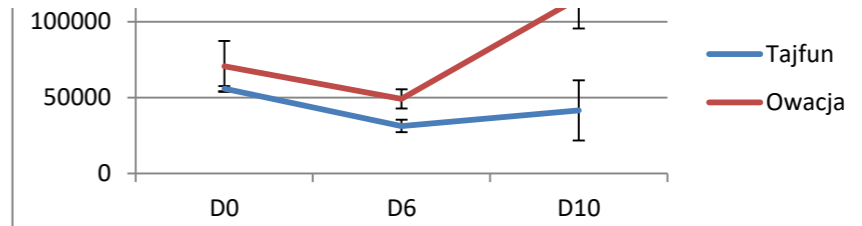

PGSC0003DMG400007678

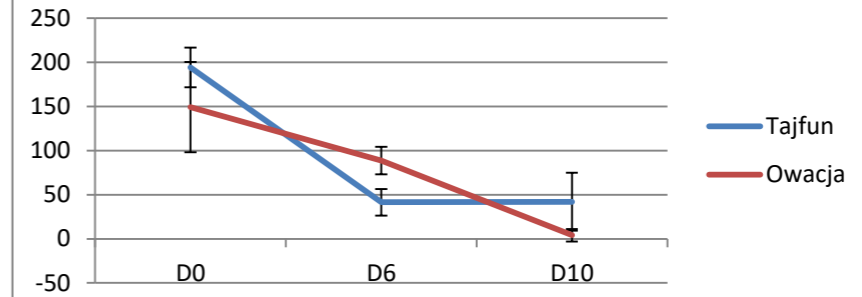

PGSC0003DMG400007693

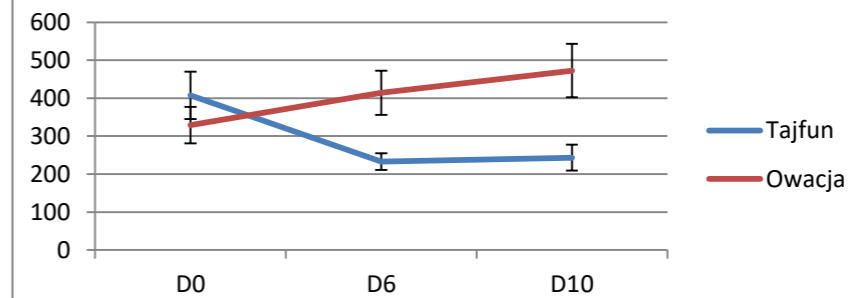

PGSC0003DMG400007740

PGSC0003DMG400007740 583,33 120,67 24,67 430,67 47,33 3,33 100,17 25,32 17,24 138,66 9,24 1,15

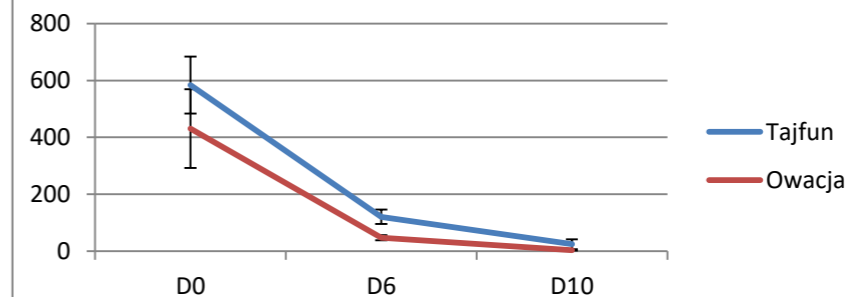

PGSC0003DMG400007787

PGSC0003DMG400007787 20541 2098,7 589,33 21307 1057,3 78,67 2975,8 37,11 388,64 7300,5 188,35 39,11

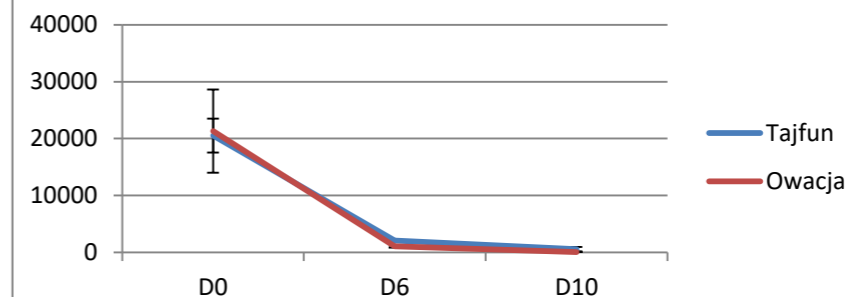

PGSC0003DMG400007978

PGSC0003DMG400007978 185,33 28 35,33 178,67 92 98 58,53 2 18,04 23,01 14,42 39,85

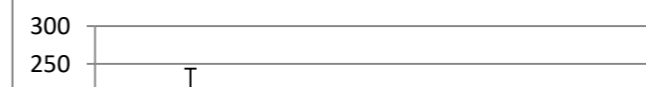



PGSC0003DMG400007992 264 102,67 25,33 148 0 0 131,19 35,12 25,01 53,7 0 0

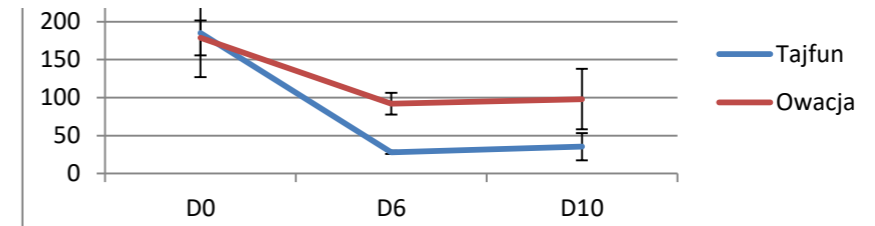

PGSC0003DMG400007992

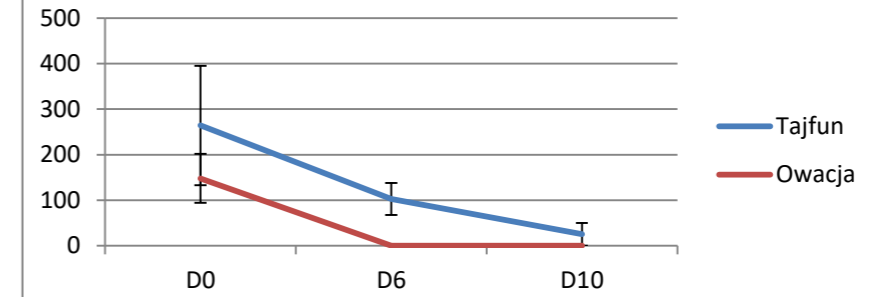

PGSC0003DMG400008018 2184 1382,3 330,33 1866,7 2481,3 1976,3 273,73 249,49 309,65 525,96 285,58 442,36

PGSC0003DMG400008018

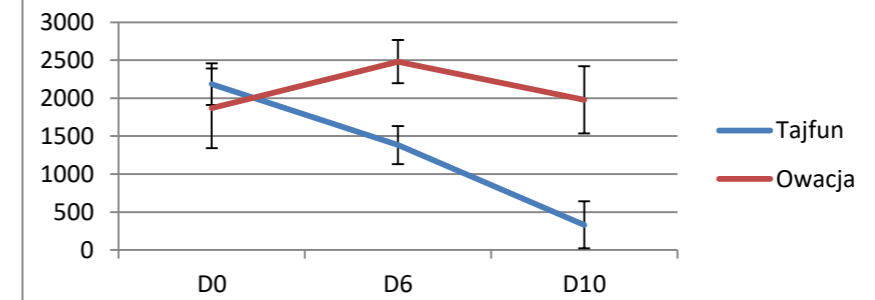

PGSC0003DMG400008021 472 48 228 518 166 531,33 109,23 43,86 184,52 190,71 36,72 124,54

PGSC0003DMG400008021

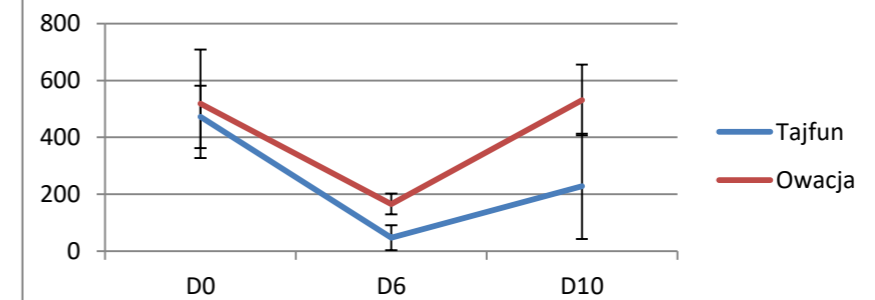

PGSC0003DMG400008262 948 528,67 498 541,33 805,33 1767,3 391,65 65,43 358,57 147,84 110,59 153,13

PGSC0003DMG400008262

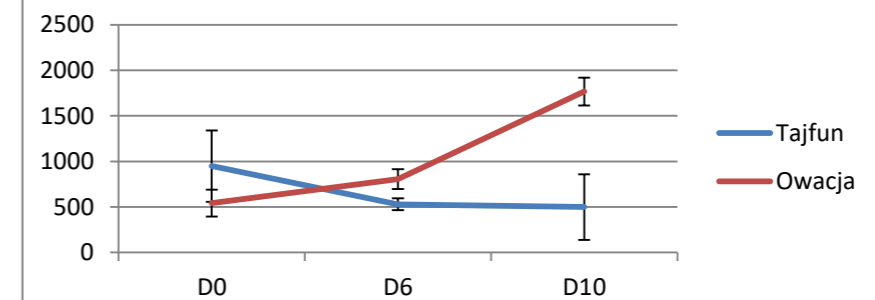

PGSC0003DMG400008326 2612,7 1906 1736,67 3036,7 2621,3 3592,7 461,87 491,97 340,41 532,79 360,98 238,17

PGSC0003DMG400008326

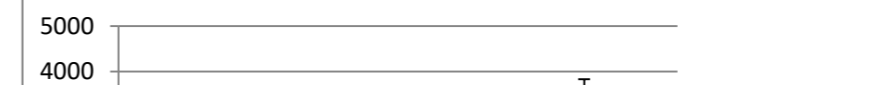

PGSC0003DMG400008357 1234 296,67 156 1141,3 160 46 423,83 47,17 47,03 697,37 54,81 30

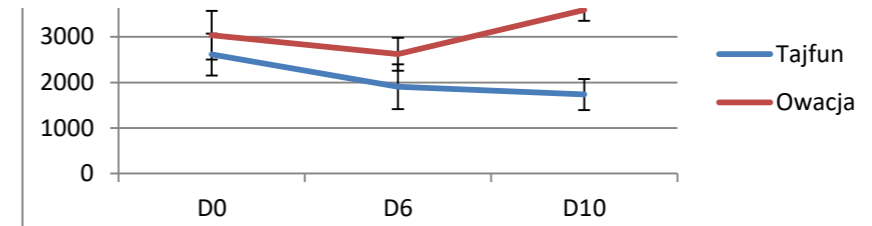

PGSC0003DMG400008357

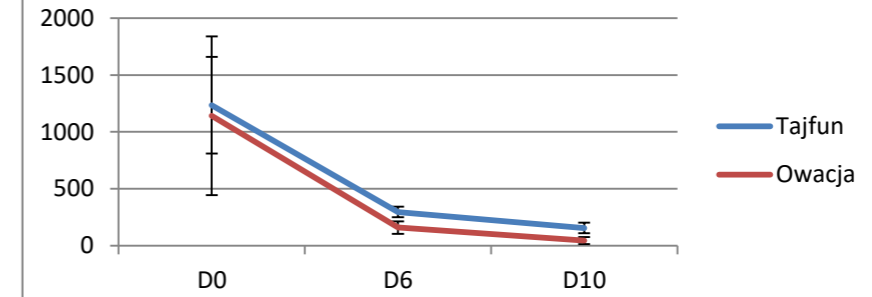

PGSC0003DMG400008504 7657,3 1325,3 2066 6326 860 5292,7 714,24 41,68 784,53 1528,9 65,57 354,54

PGSC0003DMG400008504

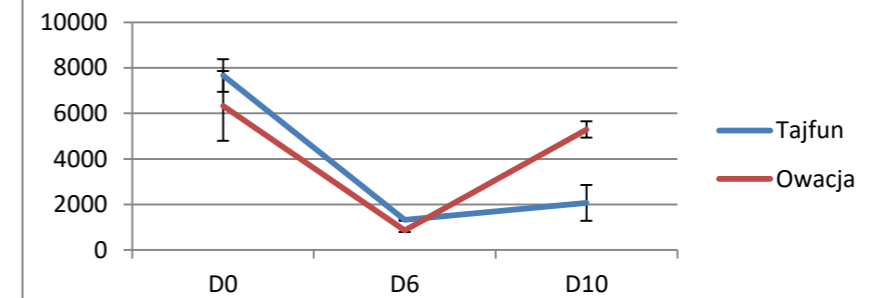

PGSC0003DMG400008584 19122 6236,7 3015,33 12203 4060 4591,3 4736,9 170,58 127,22 4783,8 534,71 358,12

PGSC0003DMG400008584

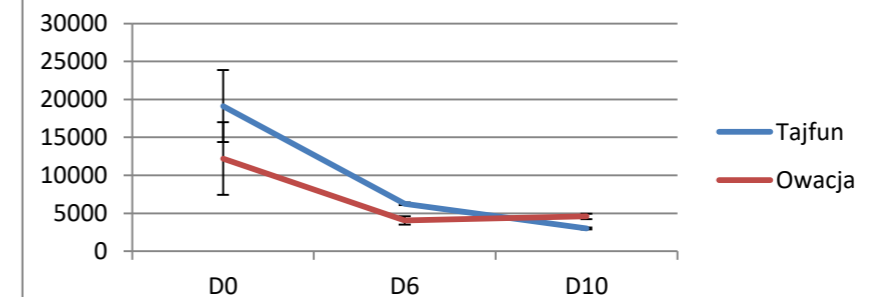

PGSC0003DMG400008587 2751,3 1369,3 1102 2230 1968,7 1564,7 596,74 133,78 321,74 455,08 265,01 61,33

PGSC0003DMG400008587

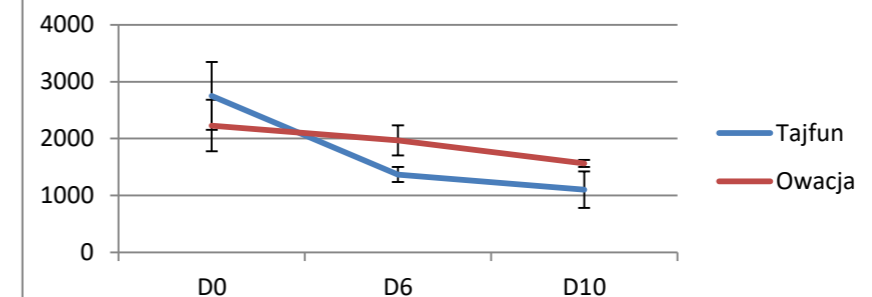

PGSC0003DMG400008834 890,67 171,33 81,33 716,67 42,67 16 216,37 55,94 34,02 85,33 8,08 8,72

PGSC0003DMG400008834

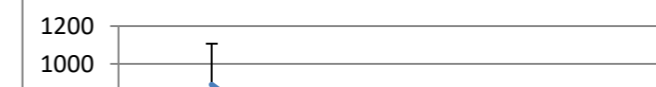

PGSC0003DMG400009072 8898 6984 3076 6968 11353 5940,7 2405,9 503,07 604,66 2749,7 408,25 1038,1

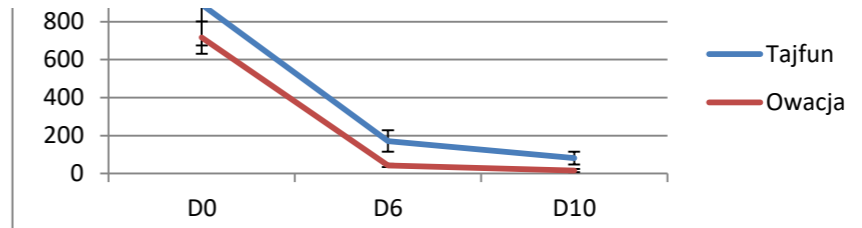

PGSC0003DMG400009072

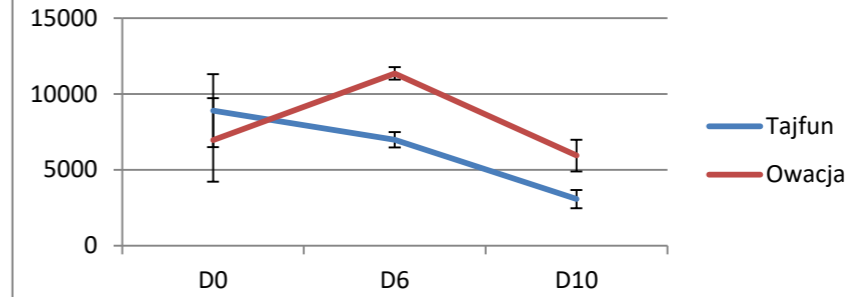

PGSC0003DMG400009456

PGSC0003DMG400009456 6700,7 2695 3100,33 8294,7 4900 4411 1157,1 814,8 454,93 707,8 1026,02 350,25

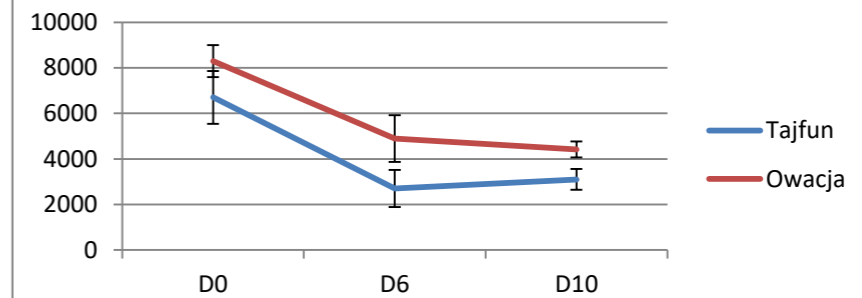

PGSC0003DMG400009984

PGSC0003DMG400009984 893,33 346 364,67 868 676 576,33 86,63 125,97 35,12 250,14 184,52 177,33

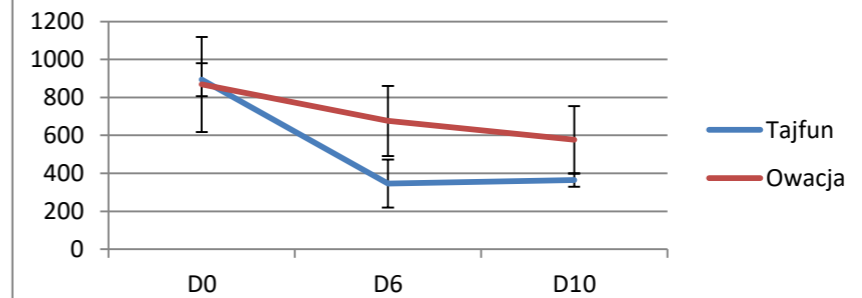

PGSC0003DMG400010010

PGSC0003DMG400010010 1410,7 672,67 475,33 1801 1312,7 849 98,66 163,02 209,42 251,49 266,55 280,34

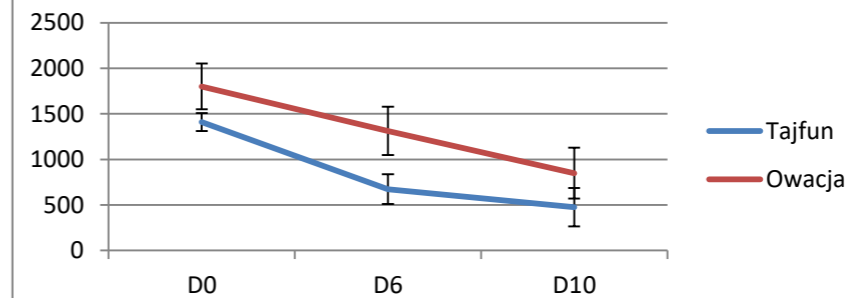

PGSC0003DMG400010468

PGSC0003DMG400010468 1444 1240 951,67 960,67 527,33 223 391,8 161,65 347,84 338,03 124,38 39,36

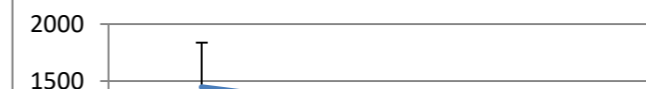

PGSC0003DMG400010477 7500,7 280 112 5094 158 14 1024,4 26,91 32,92 102,06 47,29 13,11

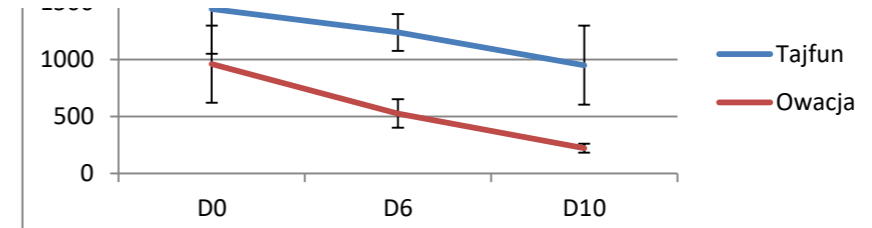

PGSC0003DMG400010477

PGSC0003DMG400011013 2249,3 1842 1027,33 1726,7 1168,7 372 276,1 307,82 308,05 346,07 215,5 111,12

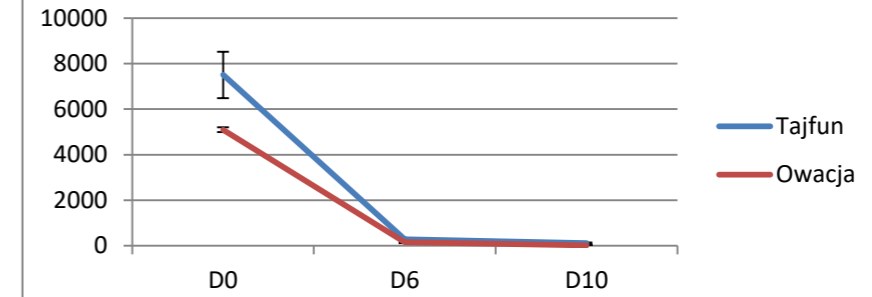

PGSC0003DMG400011013

PGSC0003DMG400011044 1820,7 384 320 2278,7 652 498,67 63,07 121,01 57,86 453,26 66,36 63,29

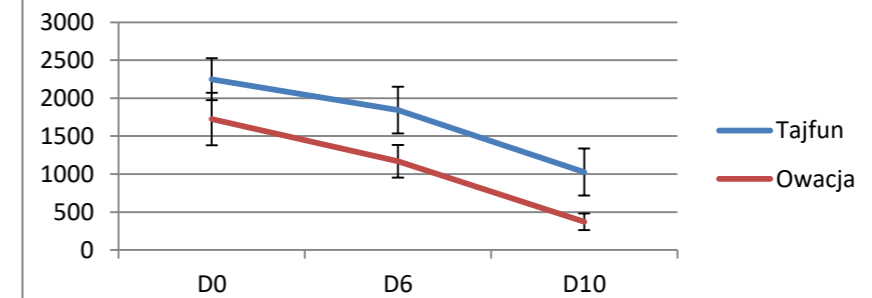

PGSC0003DMG400011044

PGSC0003DMG400011321 3656,3 892,67 1289,33 3765 2092 3904 507,04 123 90,72 967,16 173,01 605,12

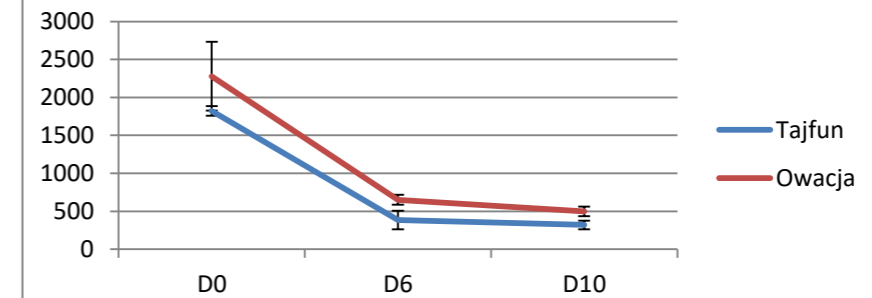

PGSC0003DMG400011321

PGSC0003DMG400011406 2555,3 569,33 90,67 1644,7 310,67 26,67 141,57 132,85 50,29 669,9 163,59 7,02

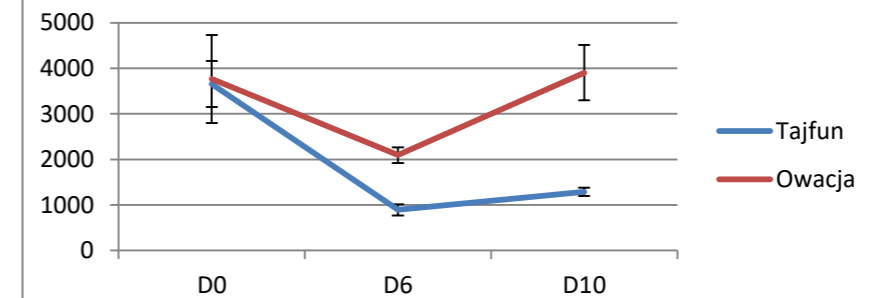

PGSC0003DMG400011406

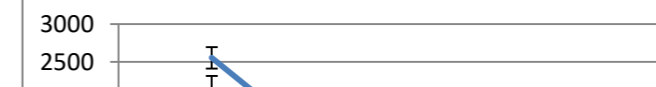

PGSC0003DMG400011750 1726 726 931,33 3052 361,33 482 229,63 162,37 43 1442,8 112,43 145,09

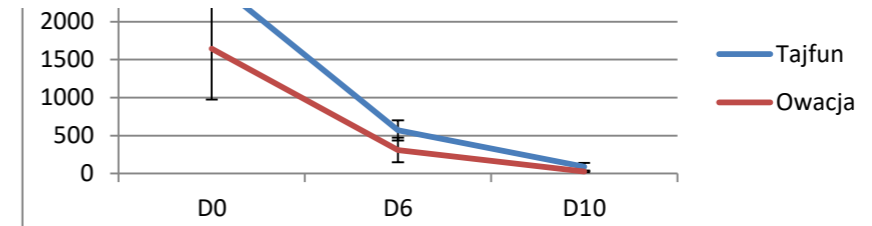

PGSC0003DMG400011750

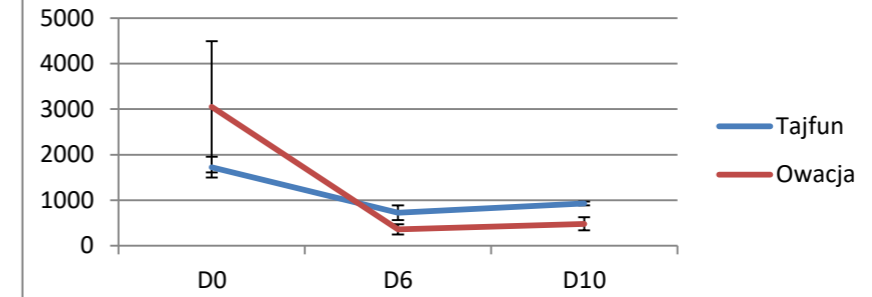

PGSC0003DMG400011811 1329,3 915,33 756,67 1230,7 1378 1242 206,73 100,29 126,64 96,03 139,56 53,33

PGSC0003DMG400011811

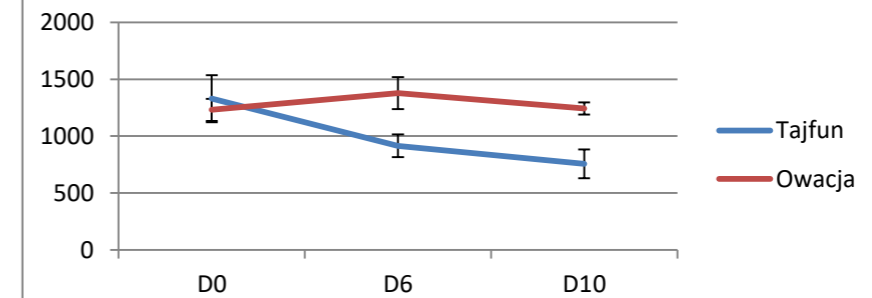

PGSC0003DMG400011842 480,67 164 100 604 256 318 133,81 24,33 83,74 111,34 31,43 68,23

PGSC0003DMG400011842

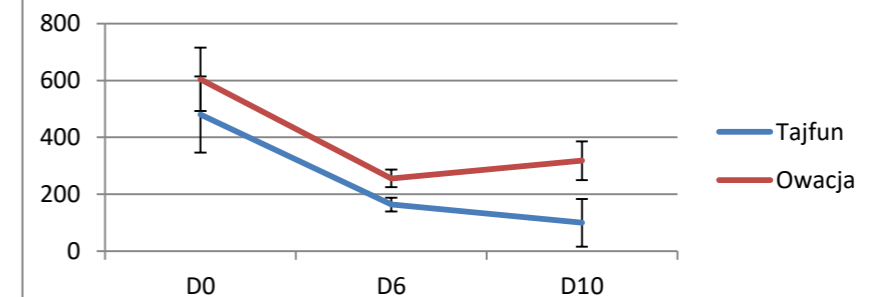

PGSC0003DMG400012224 5594,7 1340 629,33 3619,3 800,67 122,67 276,55 179,21 464,13 543,31 242,79 9,24

PGSC0003DMG400012224

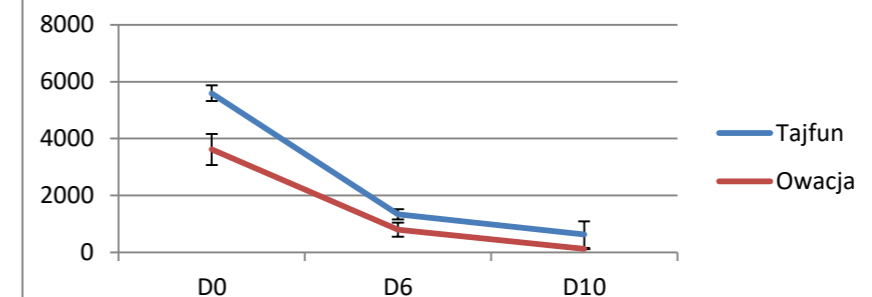

PGSC0003DMG400012265 5136 2379,3 2039,33 4414,7 1722 724,67 694,73 353,28 550,22 289,62 277,01 141

PGSC0003DMG400012265

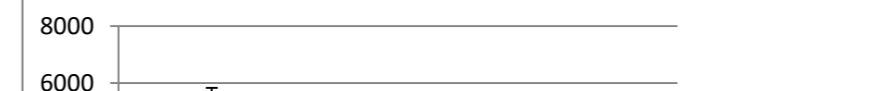

PGSC0003DMG400012571 2768,7 1439,3 1952,67 2729,3 2028,7 3285,3 376,43 183,04 757,96 464,57 202,43 321,65

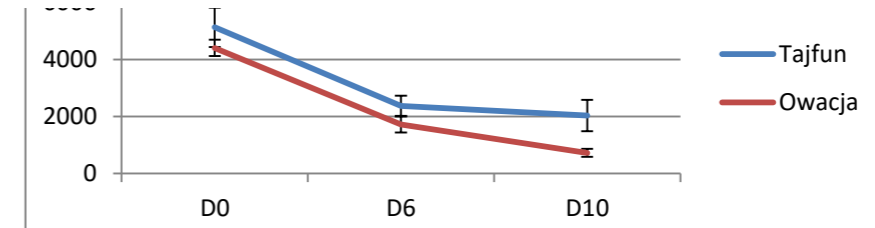

PGSC0003DMG400012571

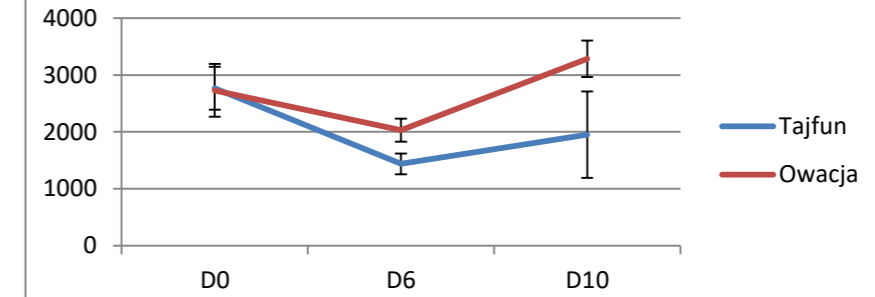

PGSC0003DMG400012614 3917,3 1041,3 1286,67 4444 1748 2703,3 251,92 327,84 97 936,34 435,67 292,24

PGSC0003DMG400012614

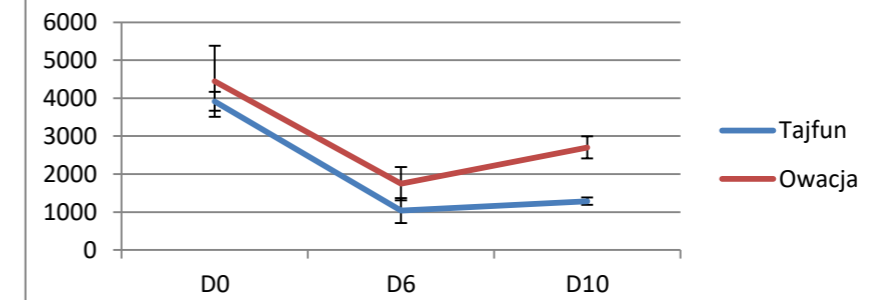

PGSC0003DMG400012631 2911,3 2197,3 816,67 1906,7 3282,7 1845,3 523,09 318,95 308 543,33 424,38 22,3

PGSC0003DMG400012631

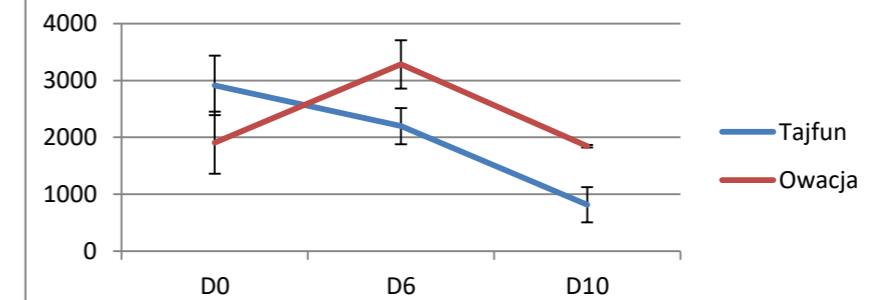

PGSC0003DMG400012696 3997,3 1924,7 1797,33 3713,3 2602 2849 676,21 439,05 175,3 1201,8 98,24 112,53

PGSC0003DMG400012696

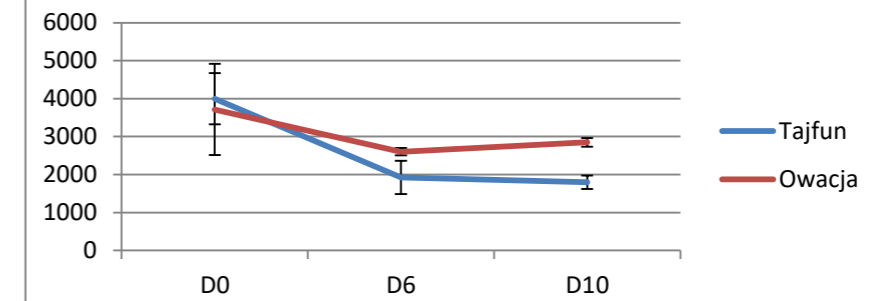

PGSC0003DMG400013297 7328 4362,7 4072 8132,7 7874 28241 590,5 1512,6 2504,12 797,39 1612,37 1369,9

PGSC0003DMG400013297

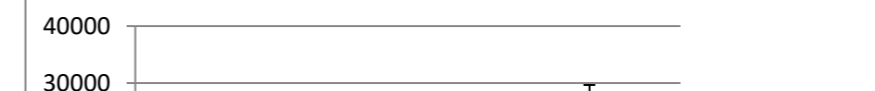

PGSC0003DMG400013412 40714 14623 8560 28406 3745,3 1642 13070 1656,1 6007,76 10712 280,02 558,87

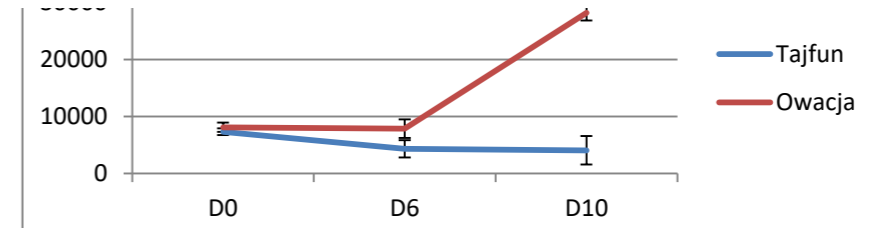

PGSC0003DMG400013412

PGSC0003DMG400013437 4422,7 1789,3 1798 4722 2618,7 2820,7 789,95 239,84 26,15 480,01 330,03 281,21

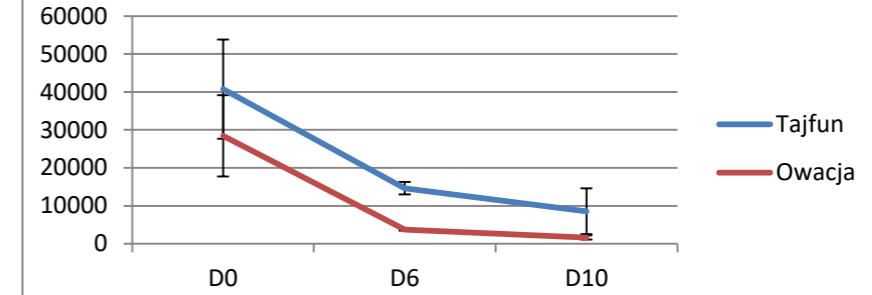

PGSC0003DMG400013437

PGSC0003DMG400013461 7899,3 837,33 230 5462 174,67 25,33 3291,3 183,09 149,08 2063,1 36,3 5,03

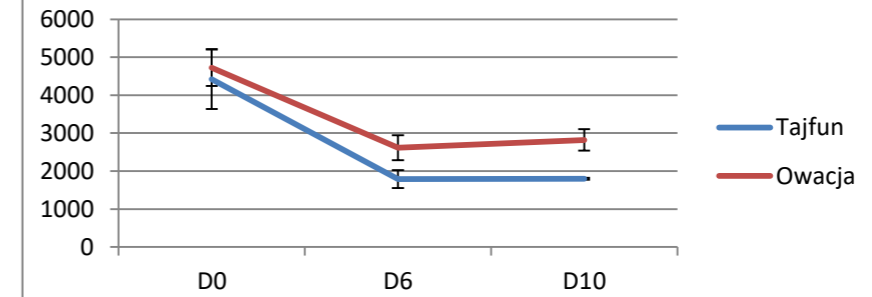

PGSC0003DMG400013461

PGSC0003DMG400013537 370,67 39,33 113,33 366 158 800 192,79 17,93 87,76 173,52 53,25 148,96

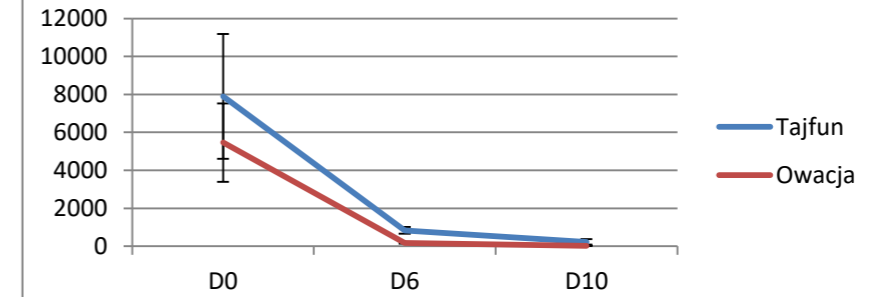

PGSC0003DMG400013537

PGSC0003DMG400013660 458 328 155,33 587,33 634 248,67 67,02 66,09 39,31 195,14 147,25 27,15

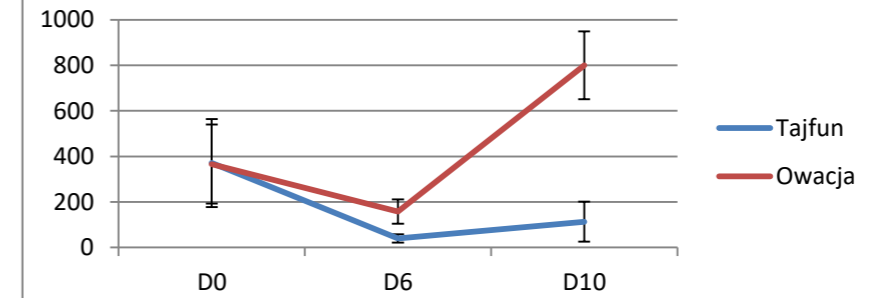

PGSC0003DMG400013660

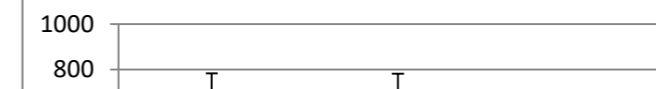

PGSC0003DMG400014421 5730 2969,7 3027,33 5305,3 4569,3 4059,3 1231,8 293,16 430,59 961,39 316,31 513,9

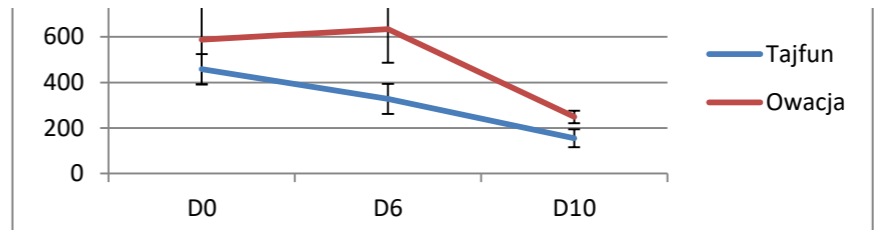

PGSC0003DMG400014421

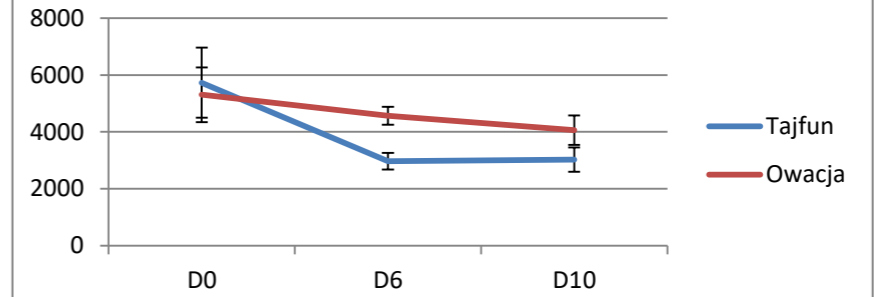

PGSC0003DMG400014954 1480 183,33 94,67 1076,7 878,67 662,67 76,08 34,02 55,22 420,82 137,44 91,24

PGSC0003DMG400014954

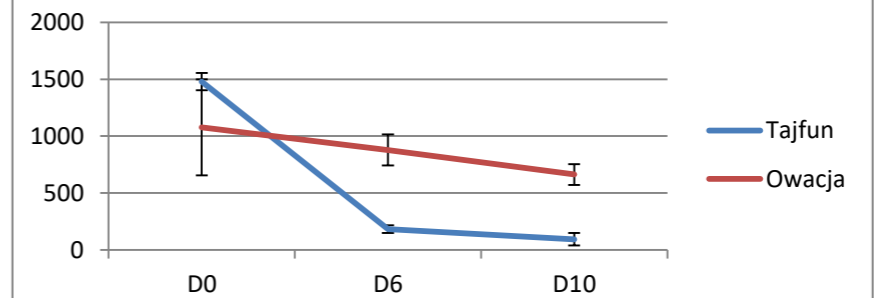

PGSC0003DMG400015154 1528 1317,3 927,33 1919,3 2706 1977,3 233,62 163,64 223,27 485,92 281,25 347,71

PGSC0003DMG400015154

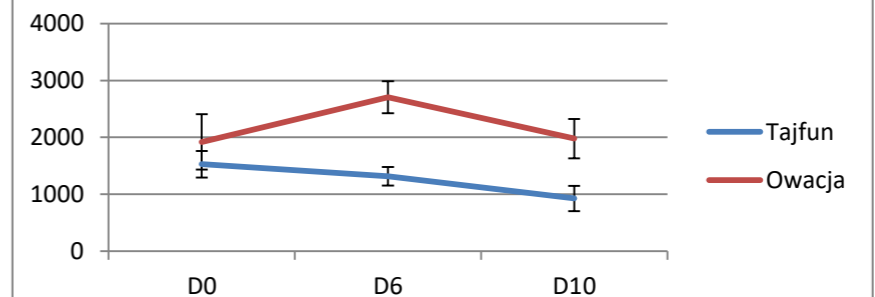

PGSC0003DMG400015347 278 64,67 33,33 250 24 8,67 54,15 35,57 6,43 87,16 5,29 3,06

PGSC0003DMG400015347

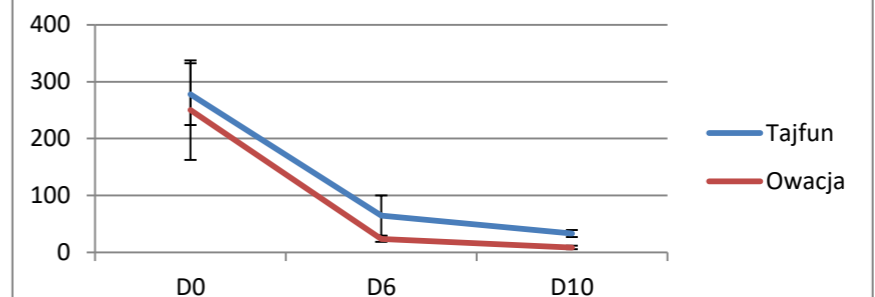

PGSC0003DMG400015665 858,67 429,33 388 1270,7 745,33 754,67 149,56 47,38 124,72 451,27 97,29 240,01

PGSC0003DMG400015665

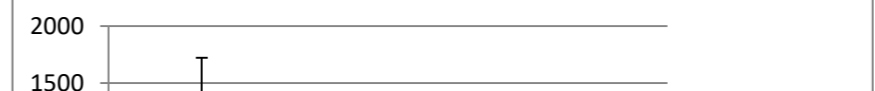



PGSC0003DMG400016120 2231,3 909,33 845,33 1954,7 1226 2032 511,55 107,04 126,26 724,74 92,26 342,41

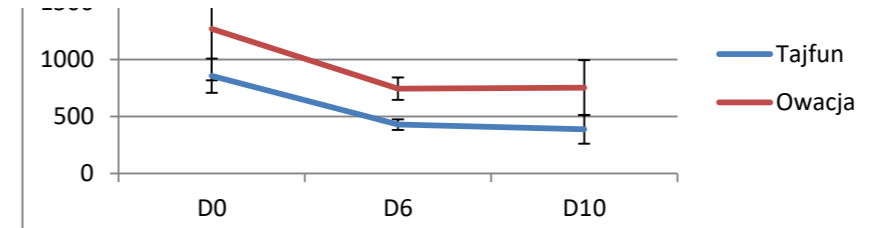

PGSC0003DMG400016120

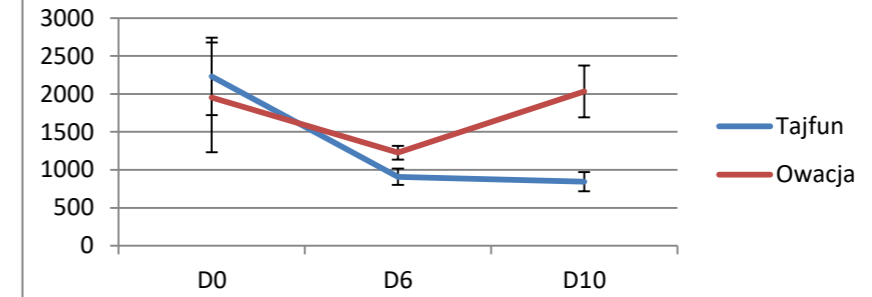

PGSC0003DMG400016221

PGSC0003DMG400016221 968,67 310 139,33 1159,3 166,67 288 192,25 31,43 57,49 434,98 45,09 51,26

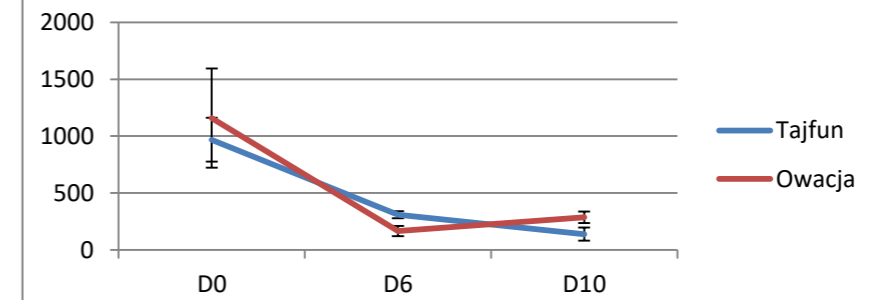

PGSC0003DMG400016317

PGSC0003DMG400016317 4080 1608 1136,67 2854,7 885,33 386,67 574,32 336,07 133,06 432,99 436,58 66,4

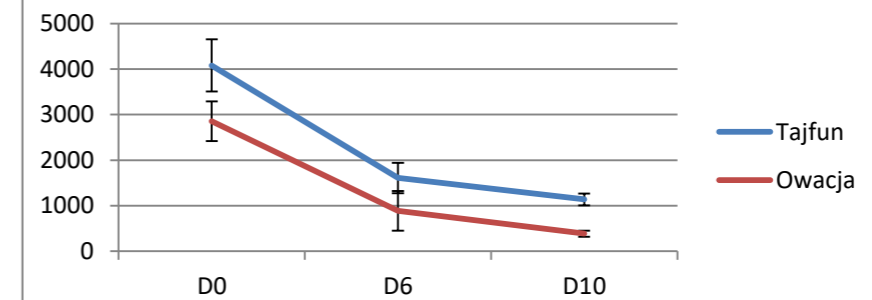

PGSC0003DMG400016319

PGSC0003DMG400016319 3812,7 822,67 787,33 3760 2178 2569,7 792,11 119,49 462,09 1124,2 563,96 389,3

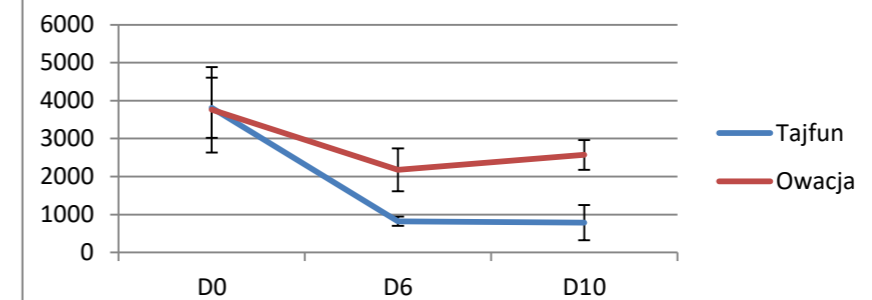

PGSC0003DMG400016829

PGSC0003DMG400016829 6476 2955,3 2957 7968 4583 4055 1379,7 209,06 895,61 556,02 1119,66 459,84

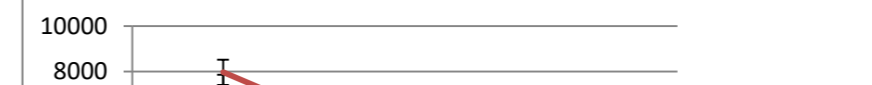

PGSC0003DMG400017110 15622 1470 1246 10831 3128 5432,7 3407,1 326,9 792,55 3494,2 164,88 1234,3

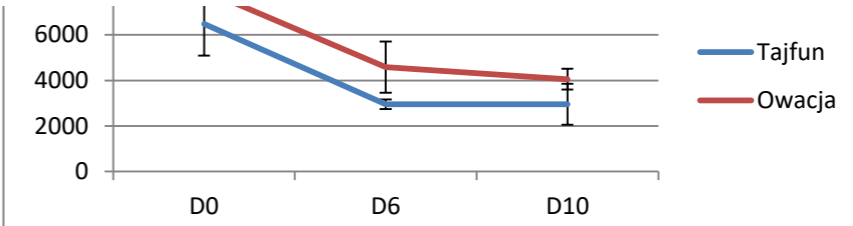

PGSC0003DMG400017110

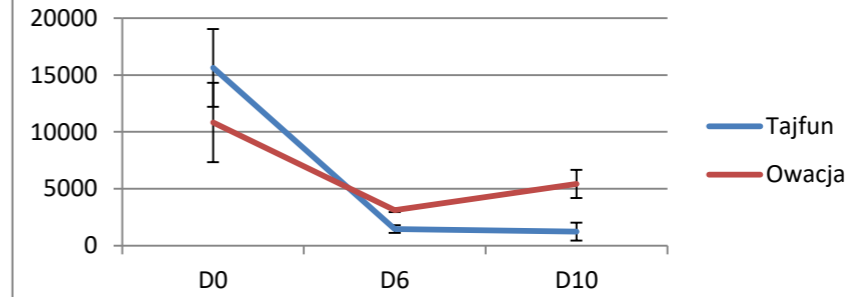

PGSC0003DMG400017181 887,33 317,33 467,33 1023,3 500,67 1399,3 192 26,1 264,06 194,22 67,89 167,02

PGSC0003DMG400017181

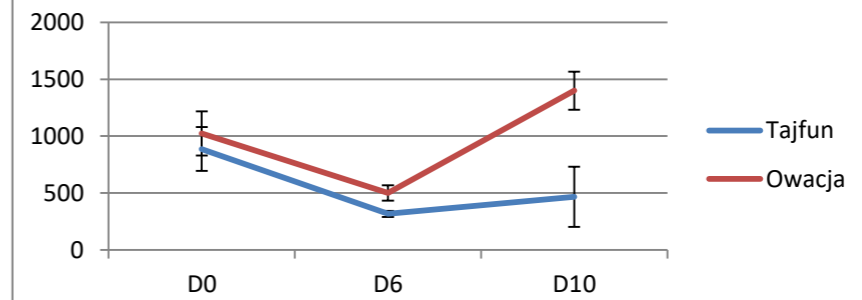

PGSC0003DMG400017396 1940,7 1600,7 1330 1519,3 2267,3 1789,3 495,91 195,81 313,58 787,8 268,96 93,09

PGSC0003DMG400017396

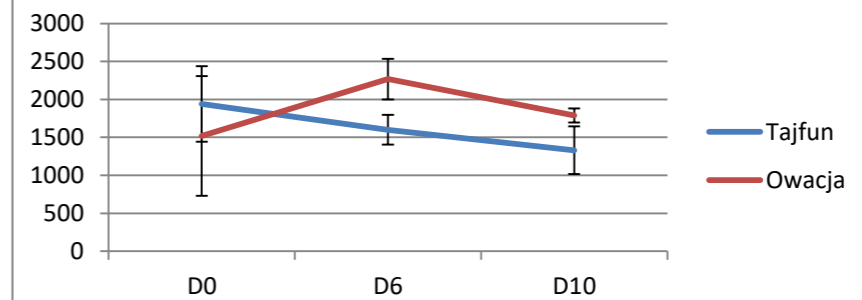

PGSC0003DMG400017560 389,33 93,33 125,33 470,67 259,33 486,67 63,29 28,02 49,89 106,31 24,11 88,12

PGSC0003DMG400017560

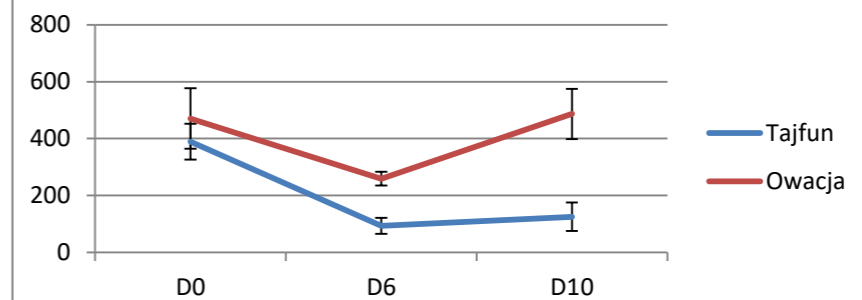

PGSC0003DMG400017570 11946 3442 2656,67 10702 2422,7 1387,3 1949 558,76 527,18 1797,9 379,92 306,34

PGSC0003DMG400017570

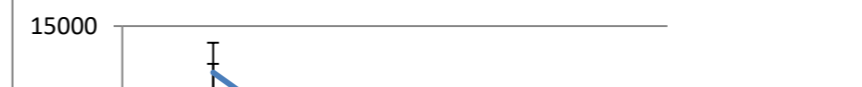

PGSC0003DMG400017738 438 58,67 22,67 763,67 117,67 130 78,71 16,65 10,07 430,59 14,29 23,07

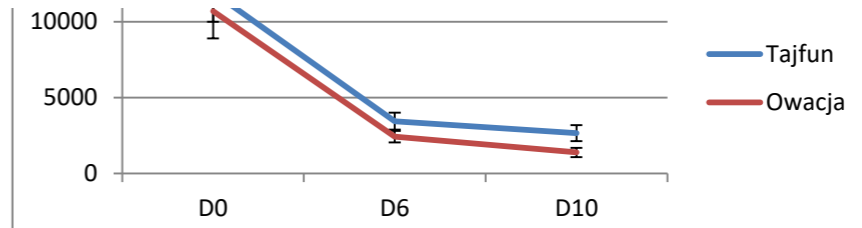

PGSC0003DMG400017738

PGSC0003DMG400018141 3108,7 424 210,67 3292,7 820 924,67 705,41 68,79 158,51 1263,3 119,72 172,39

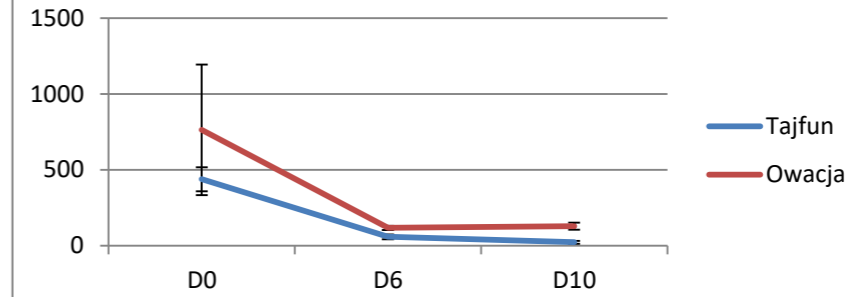

PGSC0003DMG400018141

PGSC0003DMG400018194 2164 888,67 499,33 2008 2540,7 1122 502,3 359,58 166,14 659,57 494,52 161,15

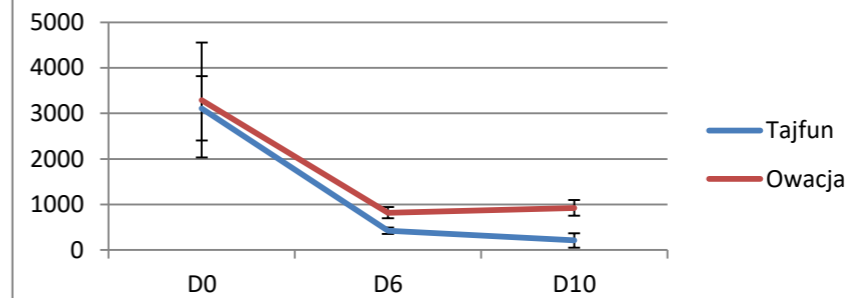

PGSC0003DMG400018194

PGSC0003DMG400018224 3640 1080 632 4438 1619,3 1181,3 243,01 124,71 64,28 681,7 191,34 40,81

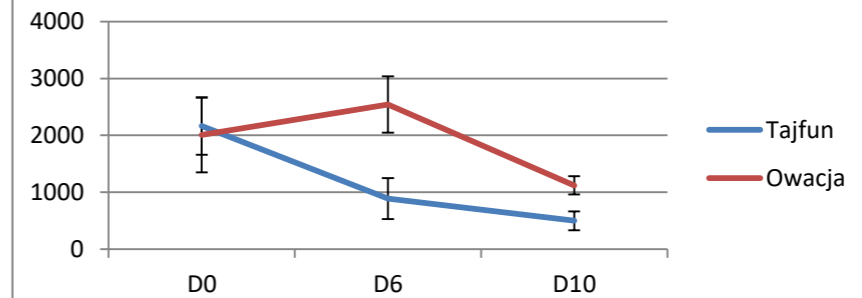

PGSC0003DMG400018224

PGSC0003DMG400018422 4148 1426 1533,33 2852,7 2342 857 598,82 183,01 209,42 1563,5 364,81 154,62

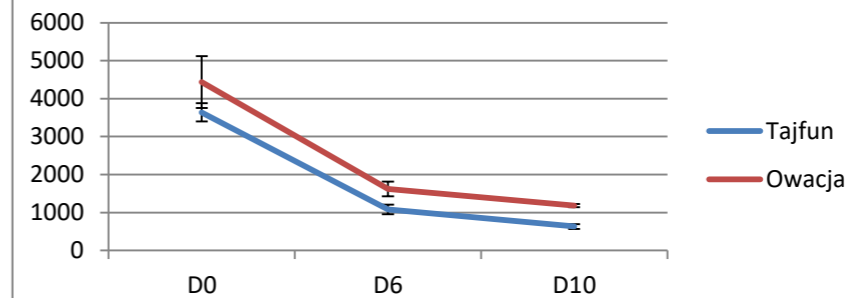

PGSC0003DMG400018422

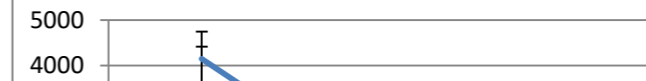

PGSC0003DMG400018598 3083 2726 1334,67 2475,3 1803,7 682,67 536,74 377,23 465,94 924,39 169,82 69,12

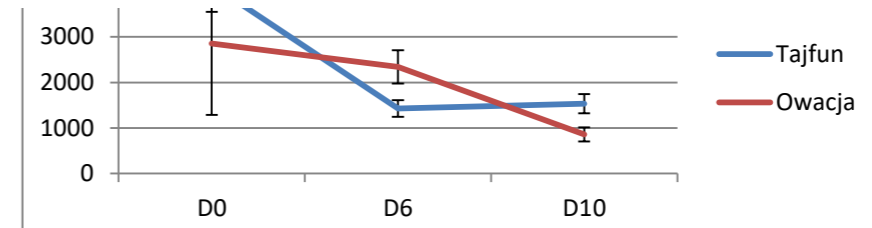

PGSC0003DMG400018598

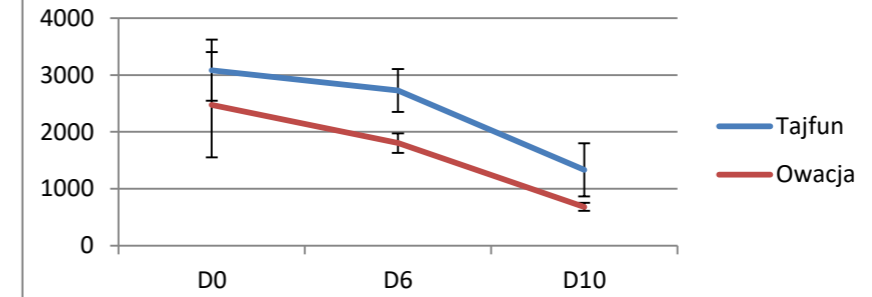

PGSC0003DMG400018678 889,33 374 197,33 821,33 1014,7 548,67 232,49 25,06 85,1 323,62 135,6 77,78

PGSC0003DMG400018678

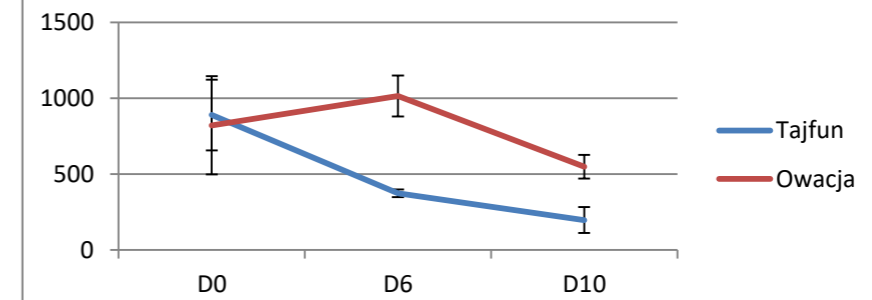

PGSC0003DMG400019191 1098 950 823,33 757,33 660 470 145,01 90,07 142,57 200,26 238,6 83,59

PGSC0003DMG400019191

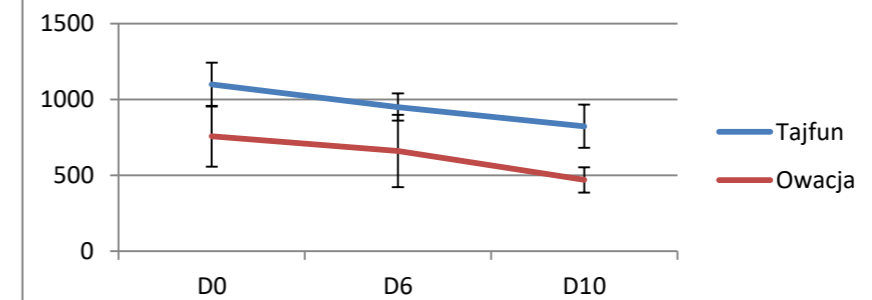

PGSC0003DMG400019241 2358 482,67 1258,67 1502 857,33 2610 236,08 58,53 111,5 411,97 277,1 620,08

PGSC0003DMG400019241

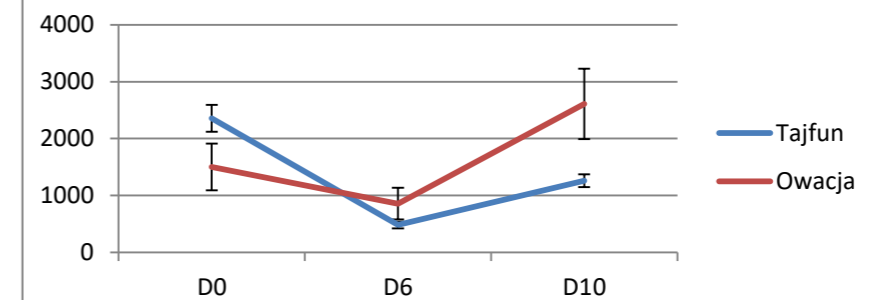

PGSC0003DMG400019254 42336 15199 9906 28557 8912,7 5660 2367 627,46 2670,02 2833,8 371,05 238,97

PGSC0003DMG400019254

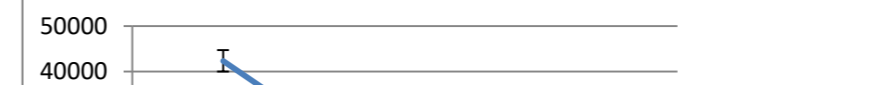

PGSC0003DMG400019521 71709 40012 27690,7 46518 28124 12751 1528,4 3361,4 10645,2 7493,9 691,18 1489,3

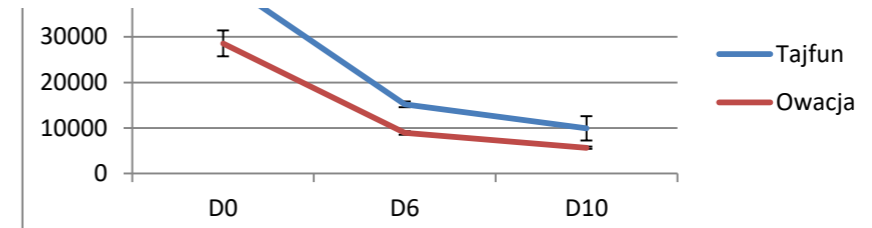

PGSC0003DMG400019521

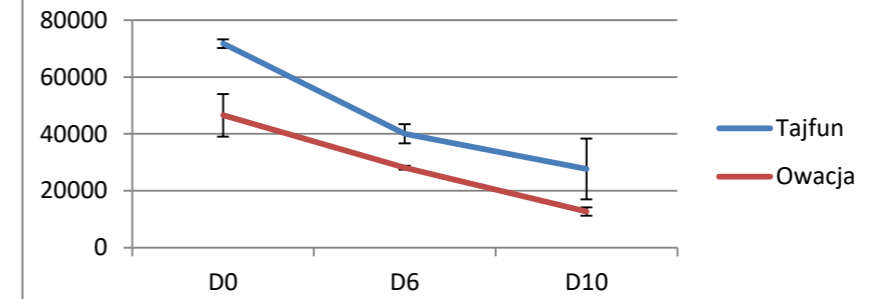

PGSC0003DMG400019872 2980 1322,7 877,33 2143,3 2816 3519,3 1294,6 471,3 61,23 404,26 273,43 799,08

PGSC0003DMG400019872

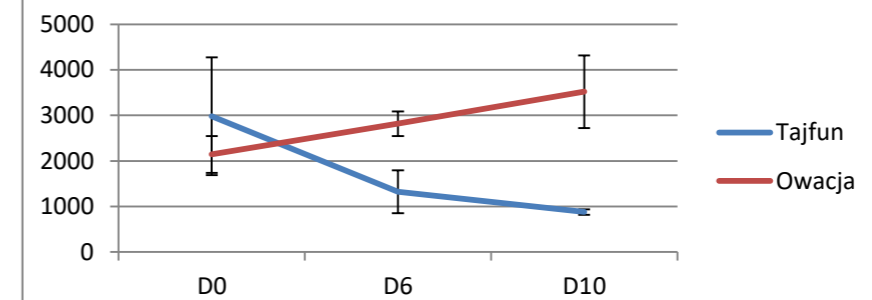

PGSC0003DMG400020105 3674 1624 1024,67 2784,7 2168,7 1439,3 868,39 114,84 238,46 1300,7 159,53 99,12

PGSC0003DMG400020105

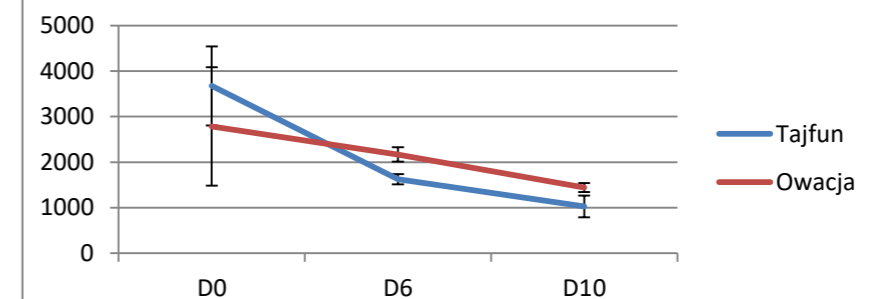

PGSC0003DMG400020118 519,67 176 248 472,67 444,33 615 145,31 26 102,35 90,16 56 113,45

PGSC0003DMG400020118

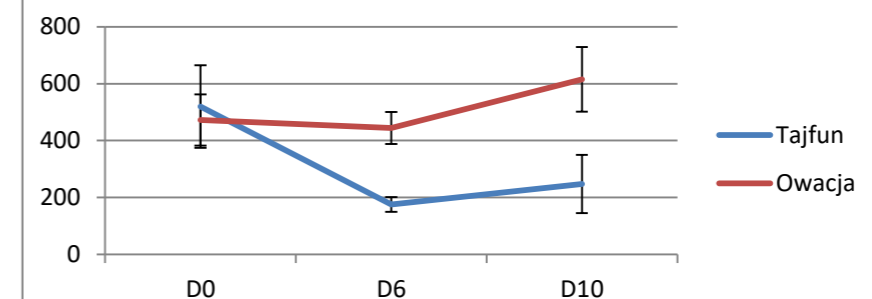

PGSC0003DMG400020619 1345,3 870 249,33 1346,7 1433,3 820 397,6 98,97 54,93 189,17 195,14 287,76

PGSC0003DMG400020619

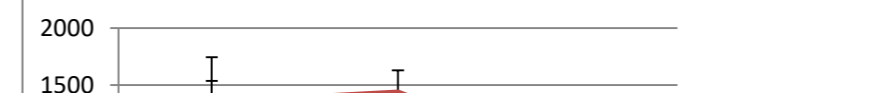

PGSC0003DMG400020906 2748,7 1786 353,33 1862,7 916,67 89,33 552,21 562,61 144,46 599 222,03 13,01

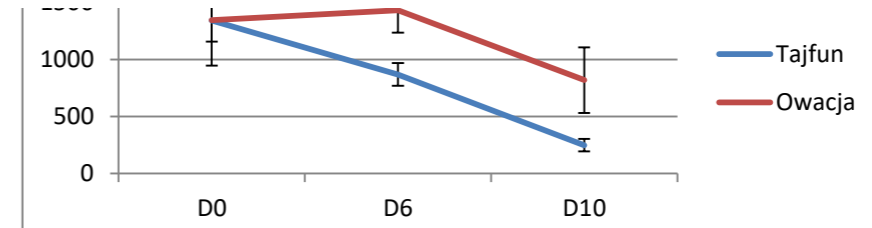

PGSC0003DMG400020906

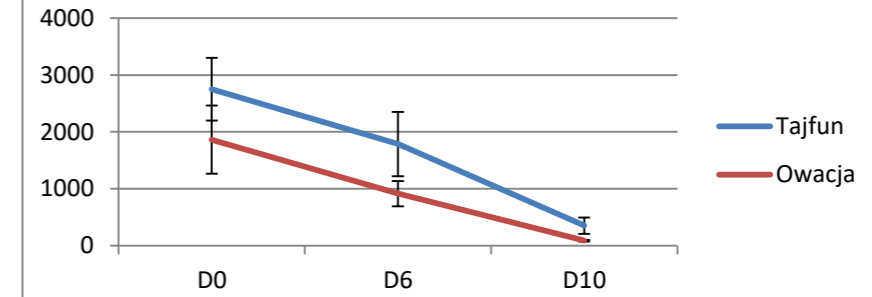

PGSC0003DMG400021008

PGSC0003DMG400021008 230 76 24 184,67 134 4,67 95,14 27,78 14 25,48 36,66 1,15

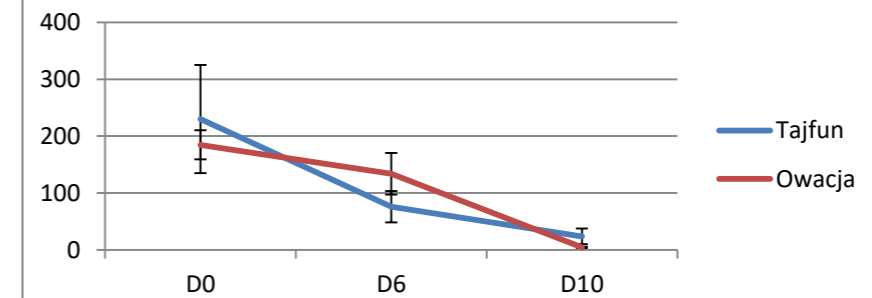

PGSC0003DMG400021072

PGSC0003DMG400021072 1860,7 482,67 638 2168,7 762,67 1054,7 273,22 56,08 287,06 427,65 79,36 58,05

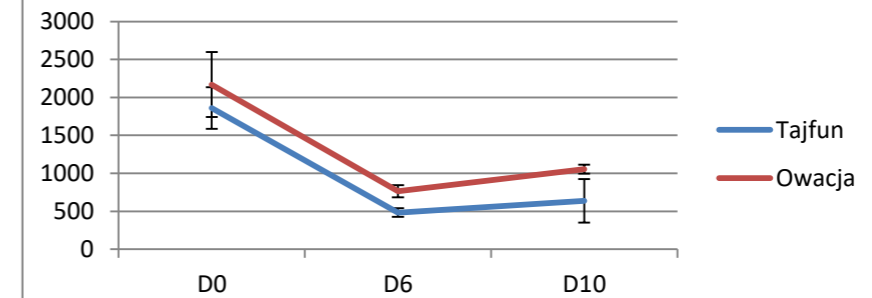

PGSC0003DMG400021398

PGSC0003DMG400021398 11040 6467 960,67 9965 4110,7 390,67 305,29 1724,7 432,15 2512,1 248,78 82,4

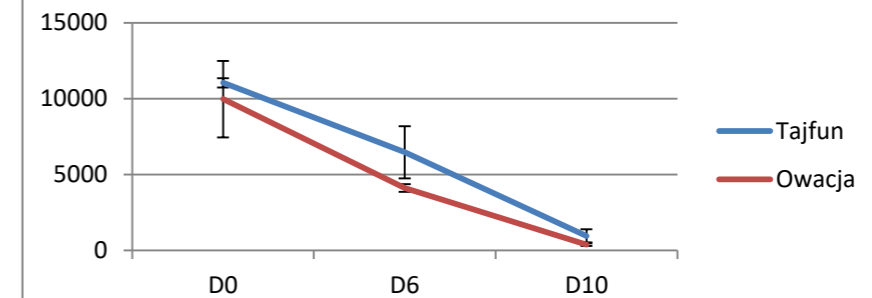

PGSC0003DMG400021550

PGSC0003DMG400021550 366,67 100,67 46,67 467,33 326,67 124 24,44 42,06 7,02 173,87 67,21 24,58

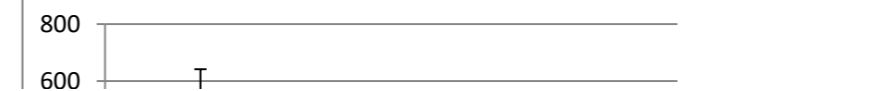

PGSC0003DMG400021769 1186 140,67 40,67 758 50,67 3,33 217,17 58,29 31,01 391,4 20,03 3,06

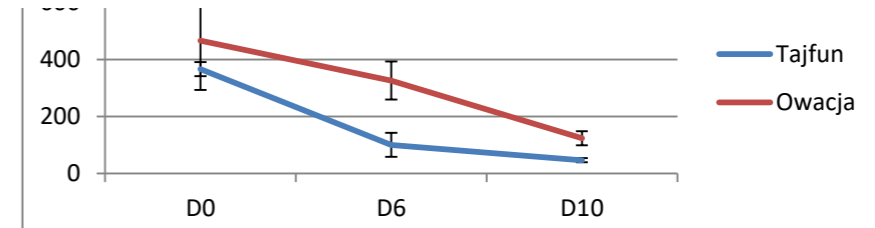

PGSC0003DMG400021769

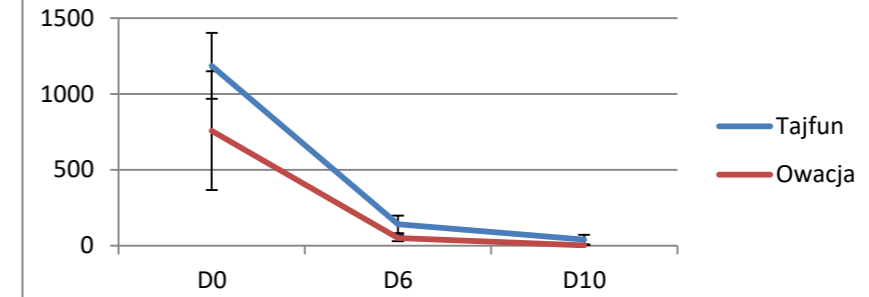

PGSC0003DMG400022225 2925,3 571,33 449,33 2494 1451,3 2228,7 239,75 116,57 128,33 365,51 171,28 588,68

PGSC0003DMG400022225

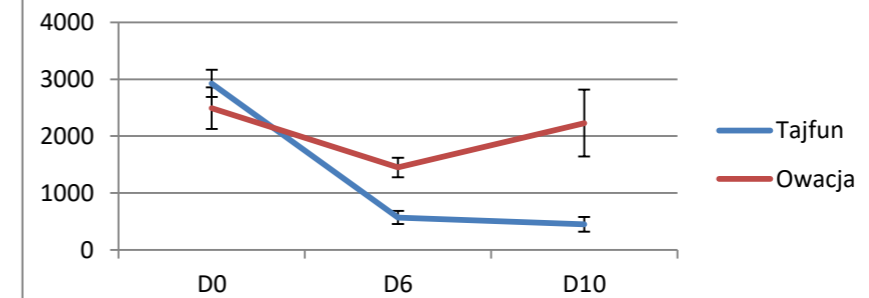

PGSC0003DMG400022299 902,67 452 316,67 573,33 170,67 86 27,3 48,5 47,43 101,87 42,25 10

PGSC0003DMG400022299

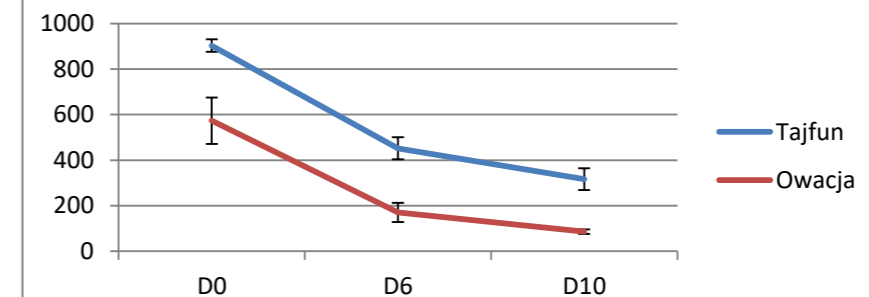

PGSC0003DMG400022426 4354 997 379,67 3000 1529,3 1338 1086,4 38,2 143,12 795,76 153,44 96,25

PGSC0003DMG400022426

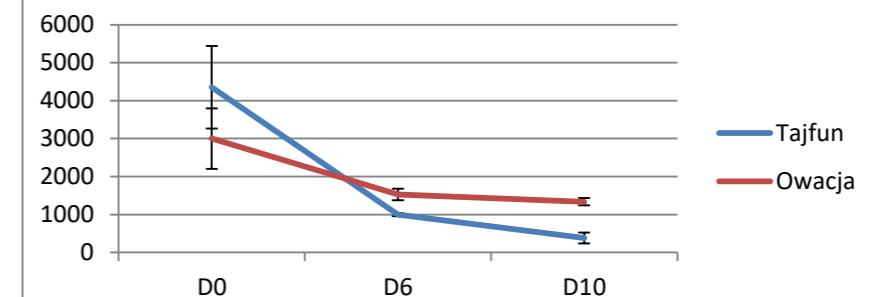

PGSC0003DMG400022779 527,33 164 266,67 666,67 371,33 512 122,84 35,16 80,41 152,06 82,86 95,31

PGSC0003DMG400022779

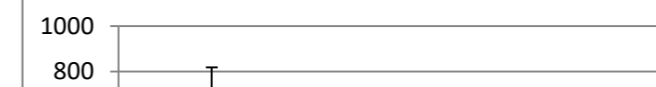

PGSC0003DMG400023416 15974 5423,3 2923,33 11355 3171,3 1131,7 1358,8 1286,9 253,74 2342,5 491,08 71,43

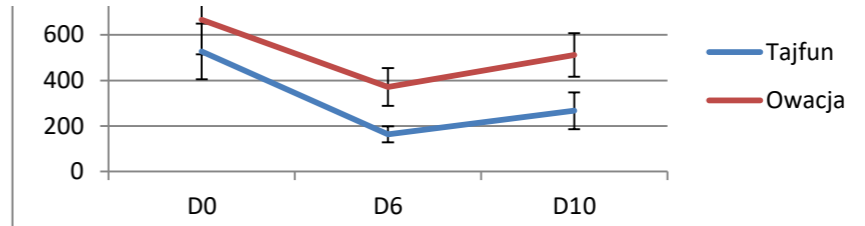

PGSC0003DMG400023416

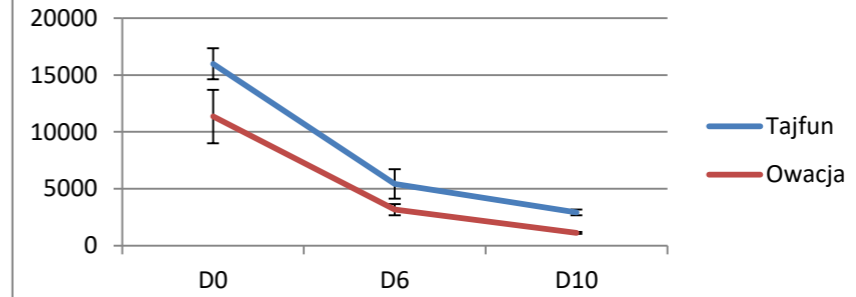

PGSC0003DMG400023602 450,67 201,33 218 476 400 1276 35 41,1 57,69 164,33 72,75 300,69

PGSC0003DMG400023602

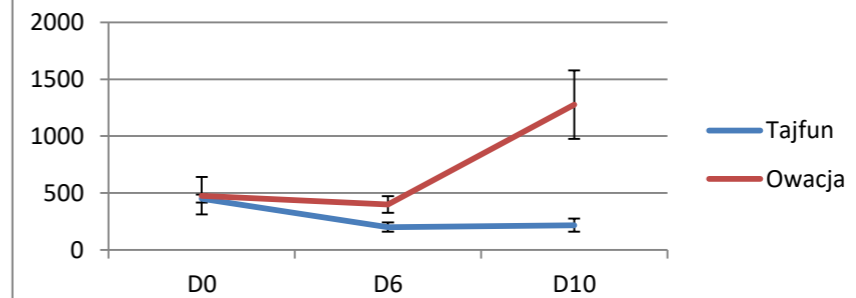

PGSC0003DMG400024197 8219,3 2921,3 4135,33 10328 4449,3 8762,7 1667,2 155,31 612,02 288,81 1177,75 1553,9

PGSC0003DMG400024197

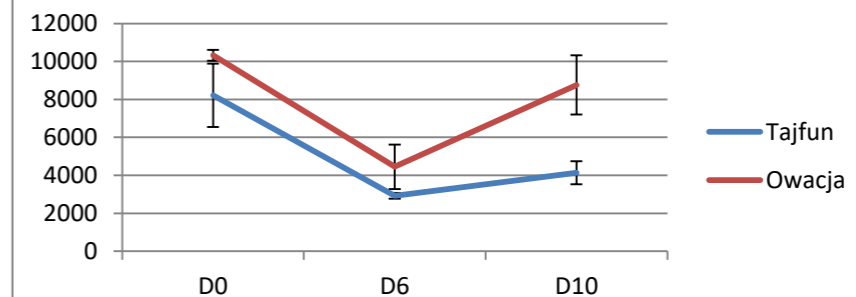

PGSC0003DMG400024633 7078,7 3326 2319,33 4911,3 2326 1174,7 1560,3 511,89 634,11 669,13 190,34 83,86

PGSC0003DMG400024633

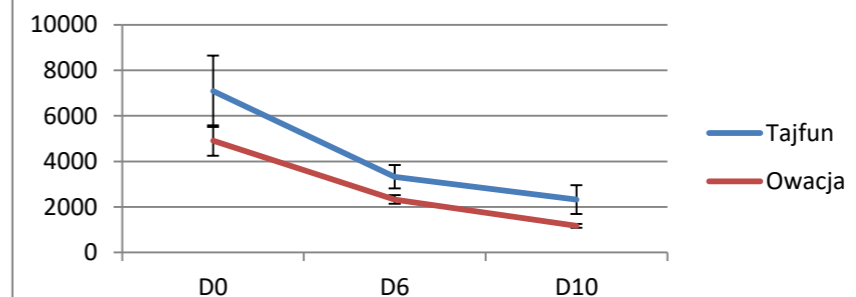

PGSC0003DMG400024656 266,67 152 160,67 163,33 84 70,67 49,41 37,36 11,02 56,08 31,75 30,09

PGSC0003DMG400024656

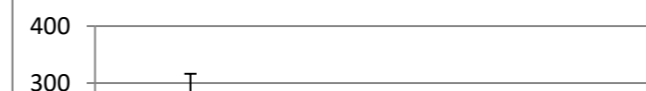



PGSC0003DMG400025007 792 301,33 243,33 646,67 174,67 80 168,3 90,78 18,58 107,93 31,39 13,86

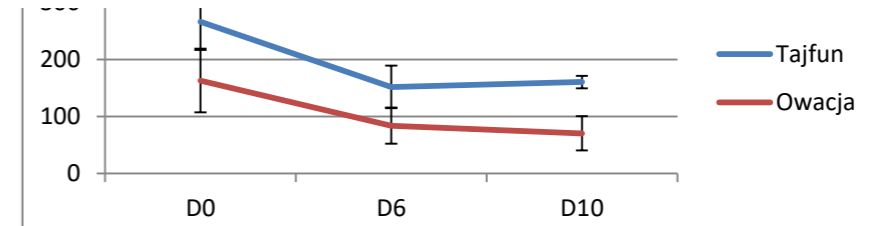

PGSC0003DMG400025007

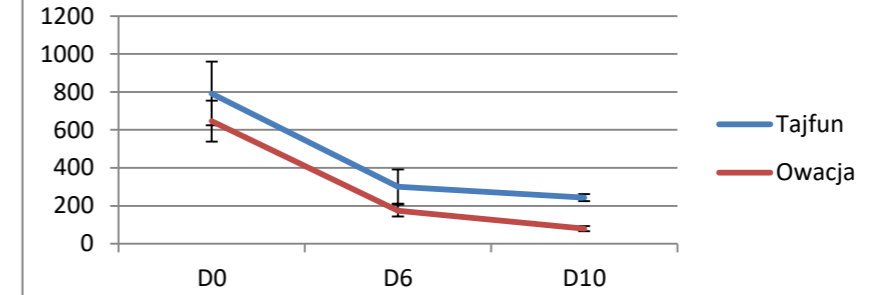

PGSC0003DMG400025102 2190,7 992 573,33 1908,7 2053,3 1007,3 534,03 374,64 75,75 601,08 513 274,81

PGSC0003DMG400025102

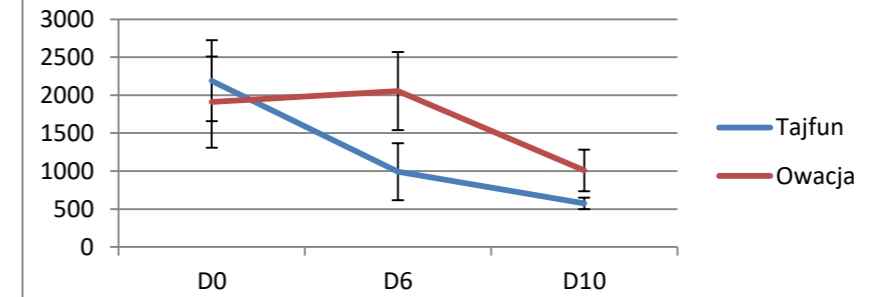

PGSC0003DMG400025814 1354,7 708,67 603,33 1058,7 1234,7 1070 189,74 106,59 388,72 146,84 401,82 57,24

PGSC0003DMG400025814

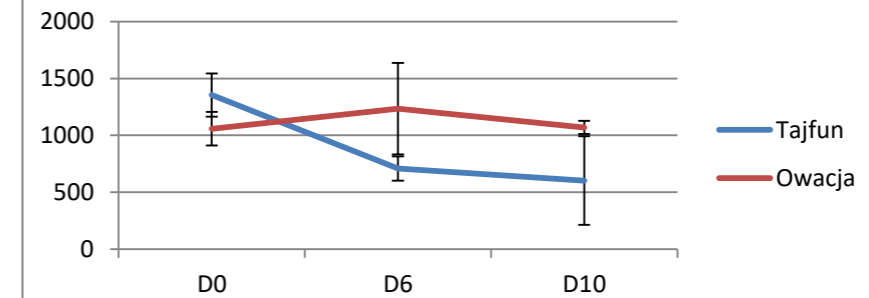

PGSC0003DMG400025862 2610,7 778,67 700 3157,3 1582,7 2101,3 945,11 171,08 352,12 920,32 218,91 90,69

PGSC0003DMG400025862

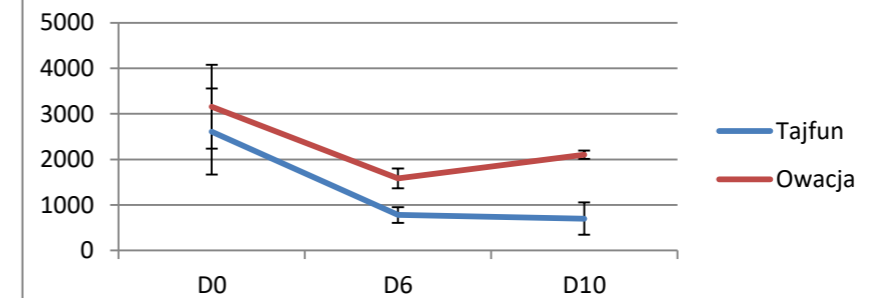

PGSC0003DMG400026106 434 291,33 254,67 299,33 164,67 118,67 135,1 81,22 98,68 56,9 51 54,45

PGSC0003DMG400026106

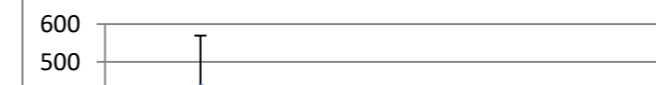

PGSC0003DMG400026199 3797 2465 2167,33 3494 3506 2993,7 515,15 149,89 882,54 1967,4 279,16 238,43

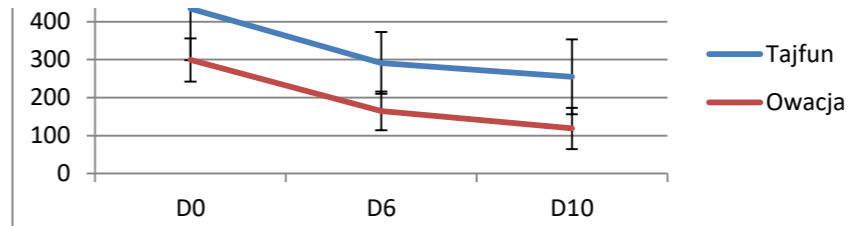

PGSC0003DMG400026199

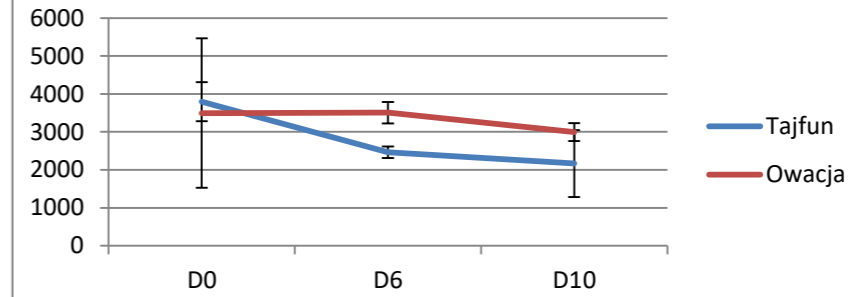

PGSC0003DMG400026446 964,67 291,33 236 744,67 119,33 440,67 86,31 11,02 74,32 164,1 61,33 111,93

PGSC0003DMG400026446

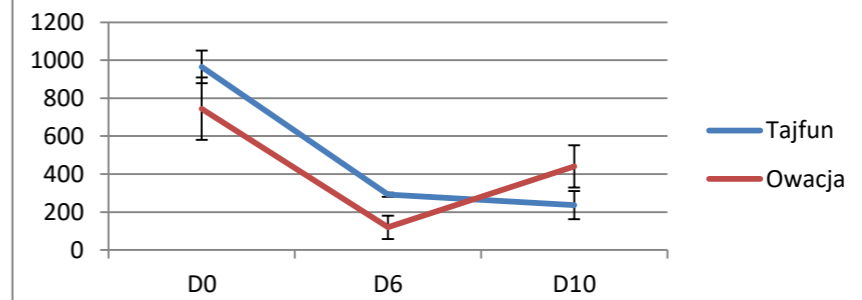

PGSC0003DMG400026472 3708 378,67 260,67 4674,7 1152,7 893,33 724,39 107,82 87,69 1429,1 257,42 208,71

PGSC0003DMG400026472

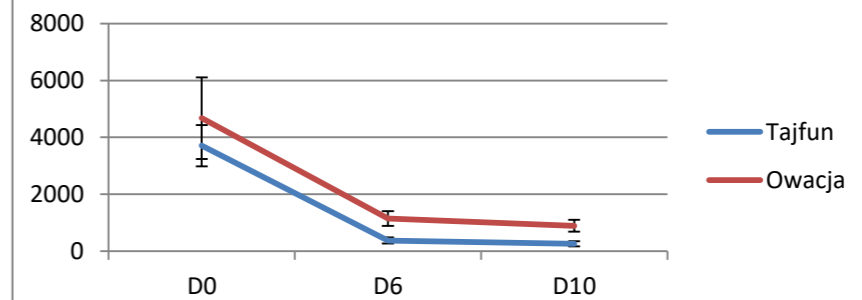

PGSC0003DMG400026516 824 395,33 135,33 784 134 54 303,13 85,19 50,65 150,57 56,71 29,6

PGSC0003DMG400026516

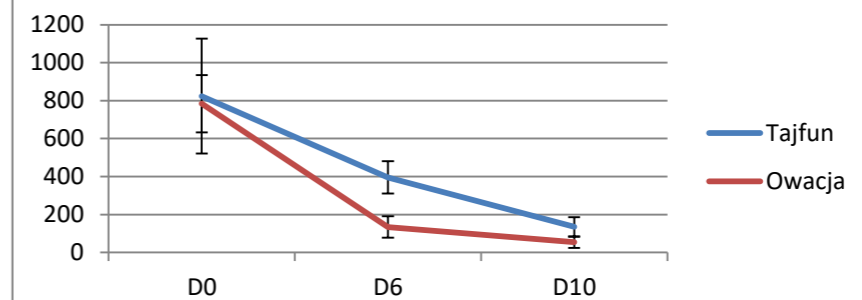

PGSC0003DMG400027156 6934 3035,3 2380 7788,7 4105,3 4701,3 1182,2 549,04 202,26 2424,1 446,52 442,73

PGSC0003DMG400027156

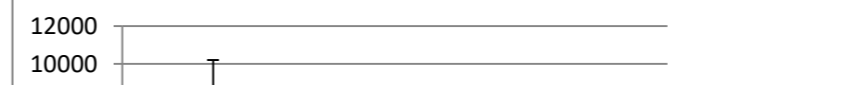

PGSC0003DMG400027746 14301 7722 3948 12280 5451,3 2234 2984,9 784,7 883,49 2566,2 200,25 356,34

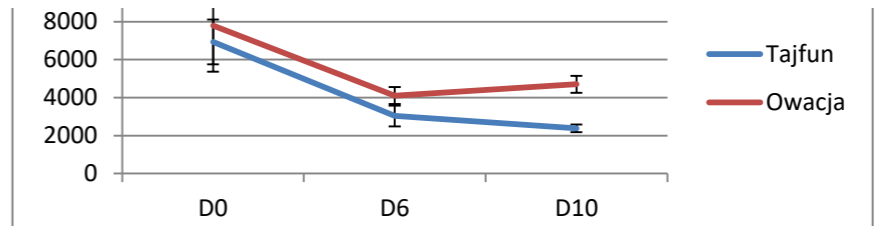

PGSC0003DMG400027746

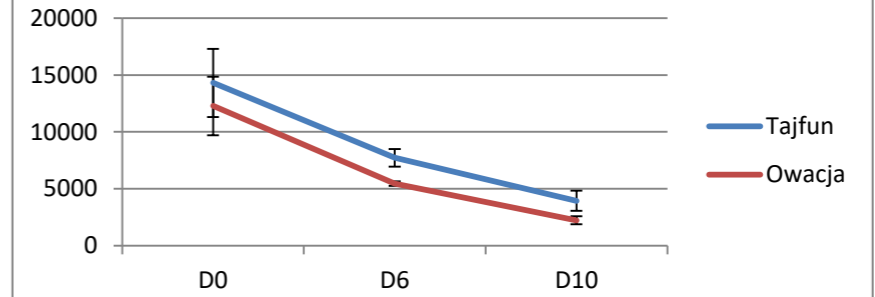

PGSC0003DMG400027951 517,67 342 336,67 380,33 214,67 105 5,51 86,81 80 80,58 56,15 11,79

PGSC0003DMG400027951

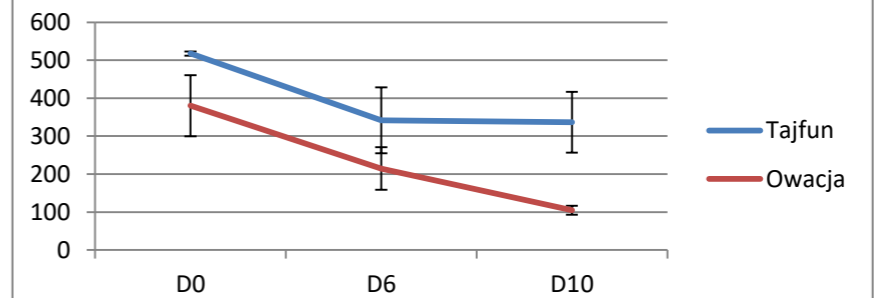

PGSC0003DMG400028137 2912,7 935,33 277,33 1762,7 454 118 689,9 236,48 79,25 825,9 140,47 21,07

PGSC0003DMG400028137

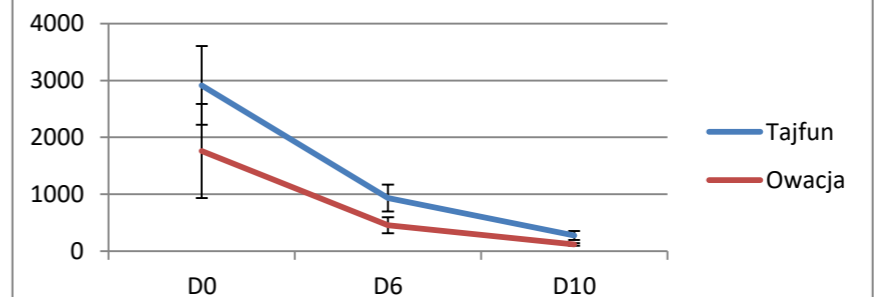

PGSC0003DMG400028164 652,67 178 184,67 402 311,33 1273,3 279,84 64,47 122,15 210,63 37,43 287,33

PGSC0003DMG400028164

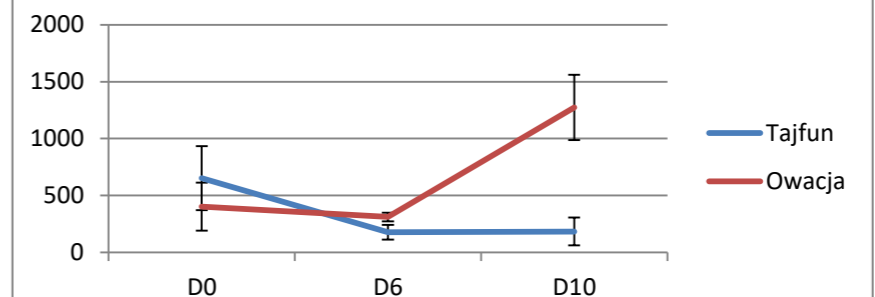

PGSC0003DMG400028288 2459,3 1282 1709,33 3303,3 2045,3 3913,3 240,45 142,51 745,92 821,38 235,37 174,73

PGSC0003DMG400028288

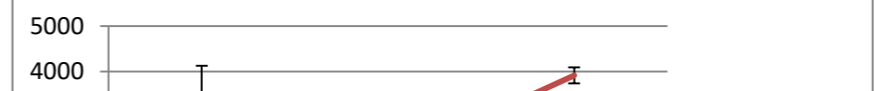

PGSC0003DMG400028363 5805,3 3539,3 2745,33 4611,3 2566 1477,3 2027,5 267,33 30,02 839,61 473,32 234,95

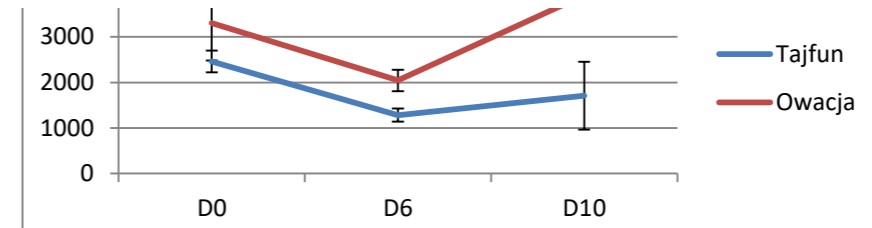

PGSC0003DMG400028363

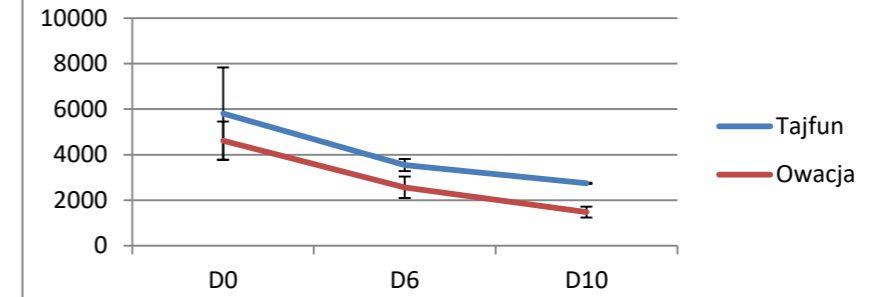

PGSC0003DMG400028977 2700 1067,3 1527,33 2422 1646,7 3530,7 100,54 151,93 283,25 516,21 511,73 352,87

PGSC0003DMG400028977

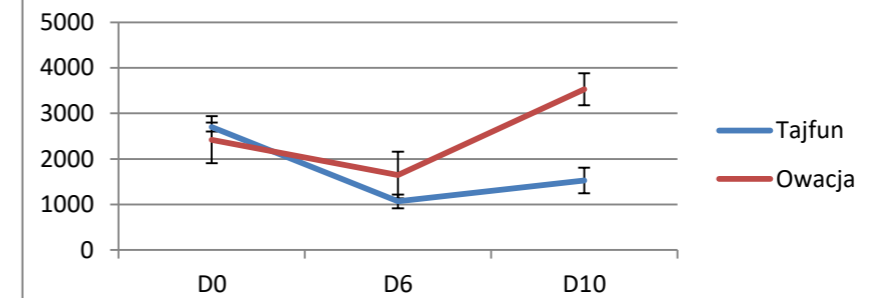

PGSC0003DMG400029086 18289 7368 1968 22286 4014 6670,7 4931 1841,4 930,63 4334,7 2172,97 812,88

PGSC0003DMG400029086

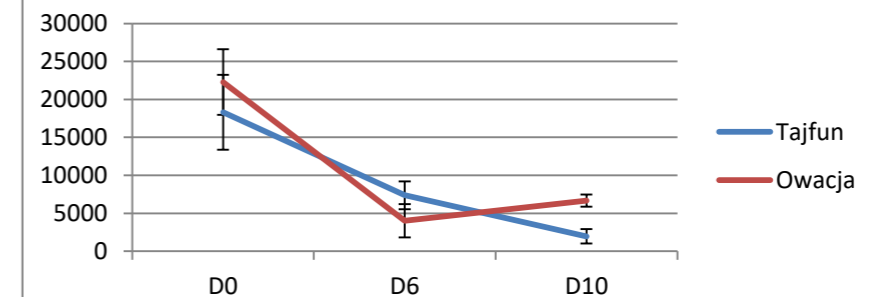

PGSC0003DMG400029294 963,33 692 676 486 370,67 387,33 29,14 159,96 110,11 439,06 169,4 53

PGSC0003DMG400029294

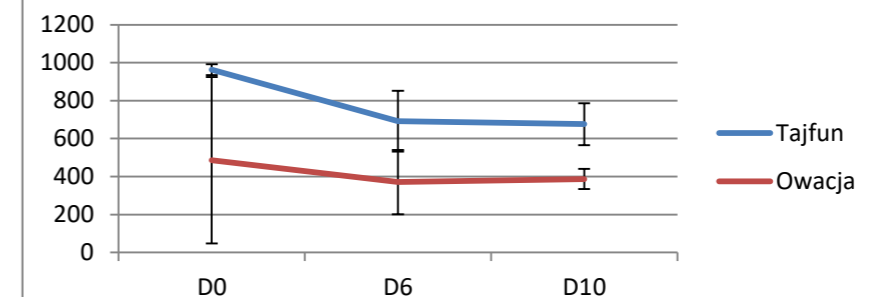

PGSC0003DMG400029355 1458,7 945,33 765,33 1653,3 558,67 325,33 294,08 196,17 46,19 388,98 102,1 21,01

PGSC0003DMG400029355

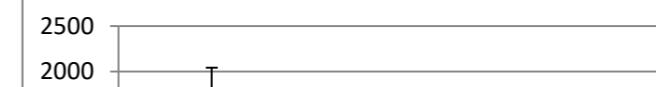

PGSC0003DMG400029373 515,33 198,67 54 532,67 108 122,67 147,31 18,15 49,76 76,79 24,33 38,44

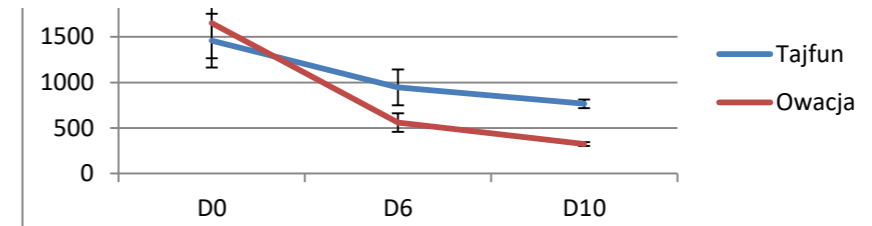

PGSC0003DMG400029373

PGSC0003DMG400029505 185,33 47,33 48,67 243,33 156,67 93,33 43,14 22,12 27,23 73,82 8,08 17,01

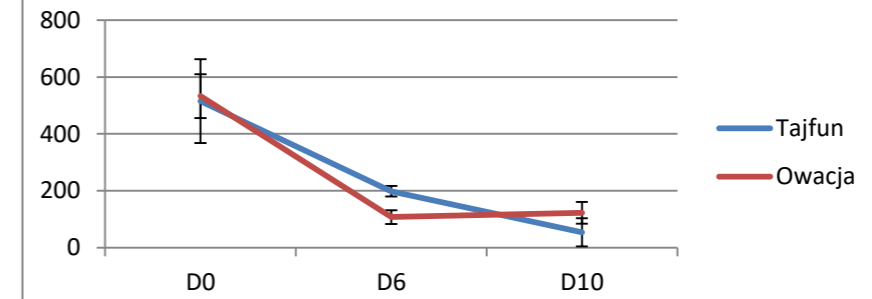

PGSC0003DMG400029505

PGSC0003DMG400029570 297,33 79,33 33,33 444 166,67 240,67 68,42 9,87 31,9 169,72 9,02 51,59

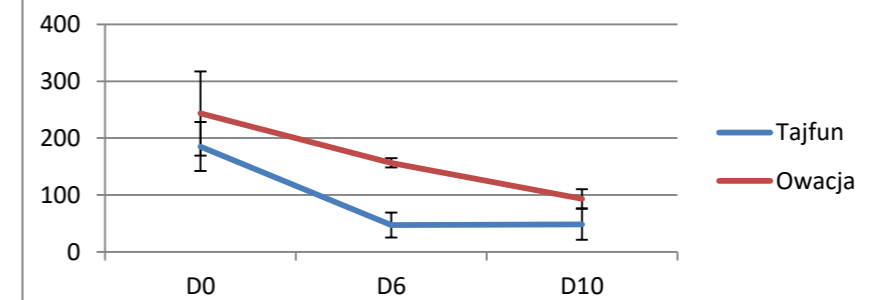

PGSC0003DMG400029570

PGSC0003DMG400029693 5336,7 2794,7 2224,67 5537,3 4038 5338,7 1433,4 128,02 377,42 1190,7 444,01 415,52

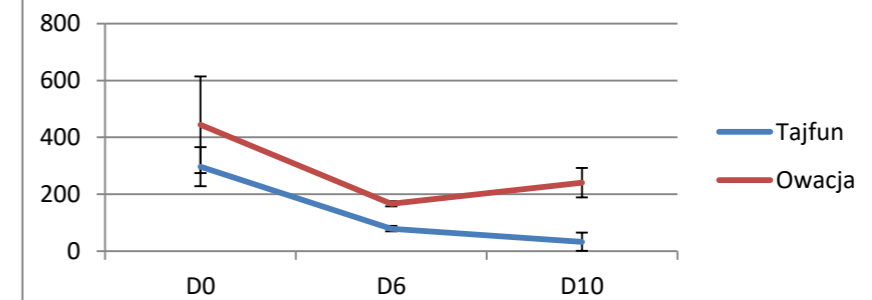

PGSC0003DMG400029693

PGSC0003DMG400029803 573,33 360 320 746,67 1210 526 172,7 90,35 32,19 72,4 18,33 155,58

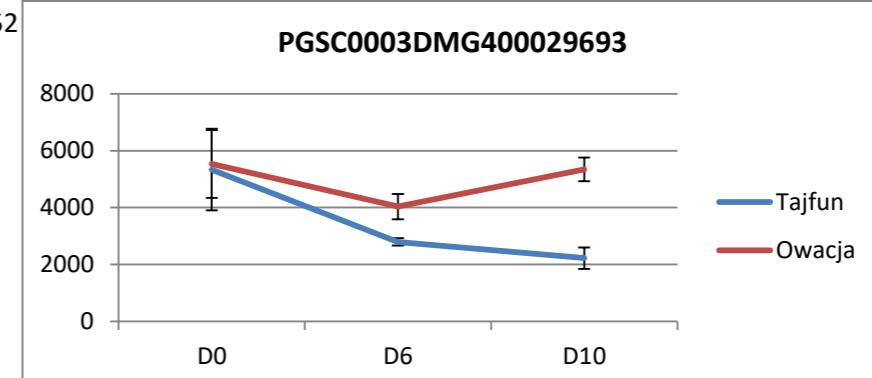

PGSC0003DMG400029803

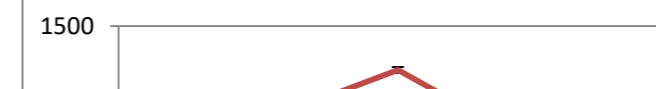

PGSC0003DMG400030220 1151,3 548 301,33 1492,7 840,67 542,67 277,95 48,87 44,24 387,27 105,84 87,23

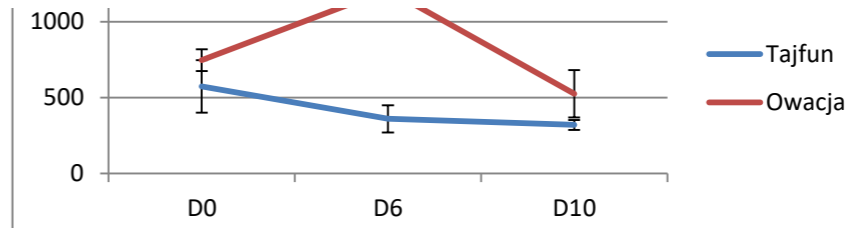

PGSC0003DMG400030220

PGSC0003DMG400030333 538,67 308 294 622,67 510,67 424,67 202,15 86,28 19,7 106,01 77,67 22,03

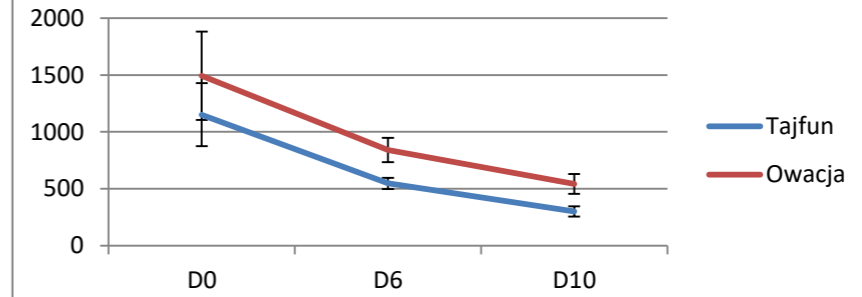

PGSC0003DMG400030333

PGSC0003DMG400030359 53755 15348 8018 51229 20885 19900 14144 3457,6 705,06 8777,2 2001,54 2115,6

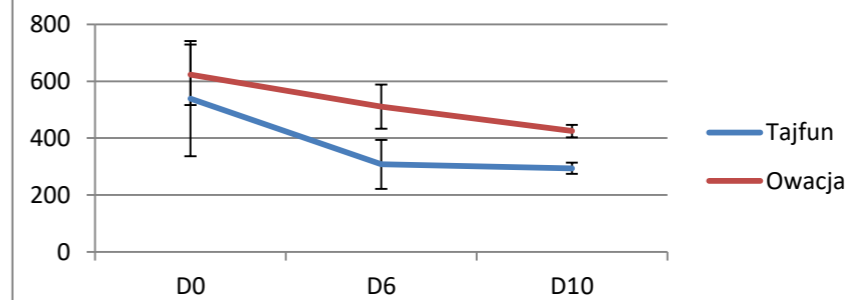

PGSC0003DMG400030359

PGSC0003DMG400030391 687,33 219,33 44 664,67 344,67 126 73,33 51,94 3,46 50,21 22,74 46,13

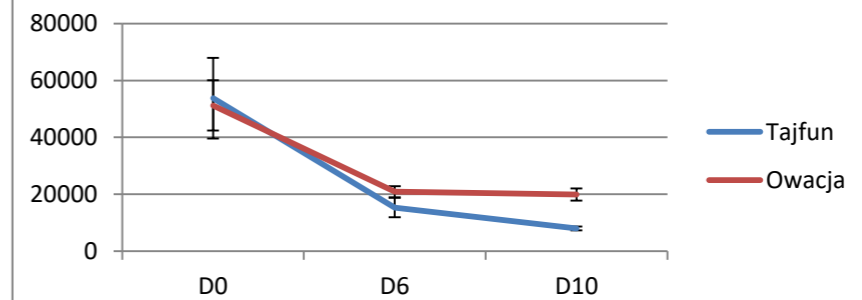

PGSC0003DMG400030391

PGSC0003DMG400030431 704,67 331,33 250 980 501,33 604,67 191,84 54,45 17,44 240,76 7,57 108,1

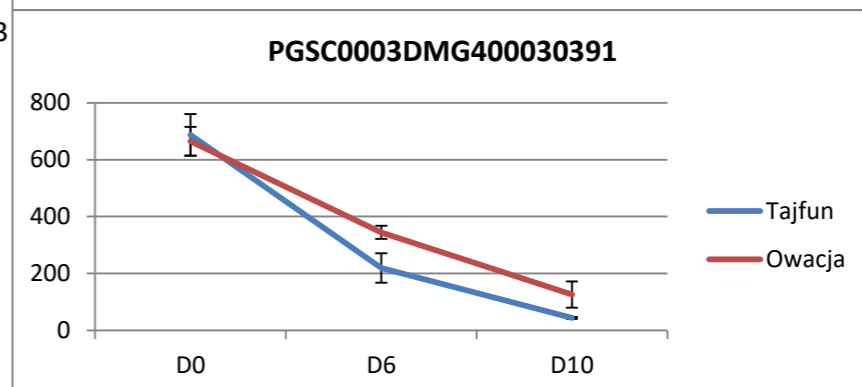

PGSC0003DMG400030431

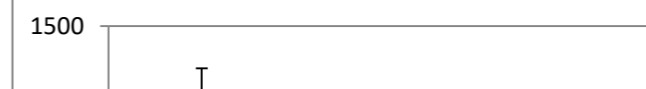

PGSC0003DMG400030694 782,67 350,67 330,67 945,33 840,67 503,33 110,01 33,55 187,15 234,65 47,72 68,77

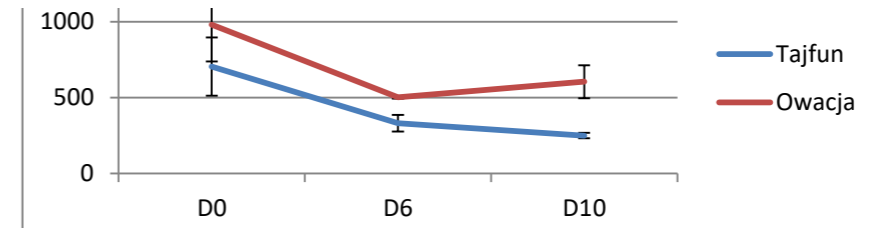

PGSC0003DMG400030694

PGSC0003DMG400030731 1150 0 220,67 464 16,67 5,33 552,04 0 186,43 230,99 17,01 4,62

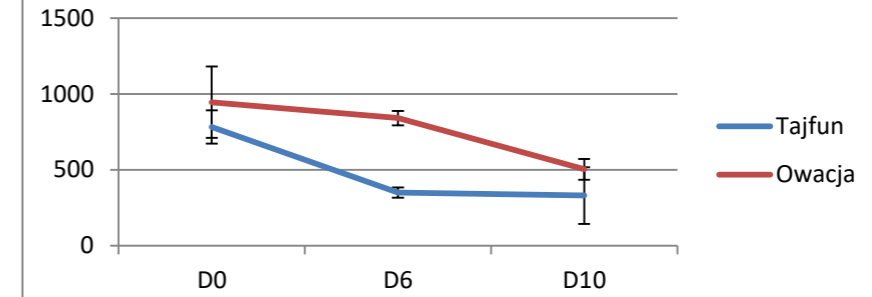

PGSC0003DMG400030731

PGSC0003DMG400030905 424 82,67 35,33 322 204,67 159,33 109,56 18,04 33,01 95,02 16,17 57,87

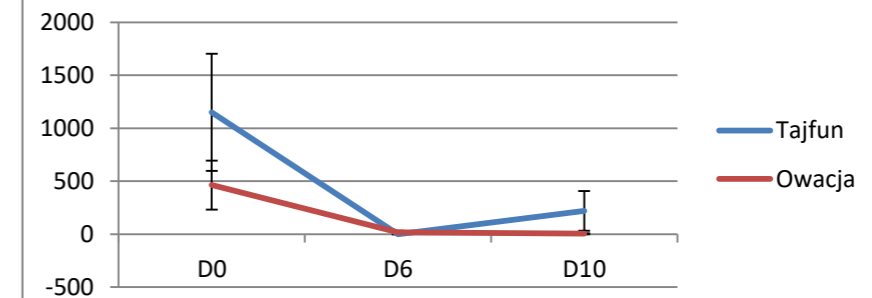

PGSC0003DMG400030905

PGSC0003DMG400030995 529,33 83,33 110,67 501,33 224 278,67 180,71 32,15 86,12 225,76 60,63 52,78

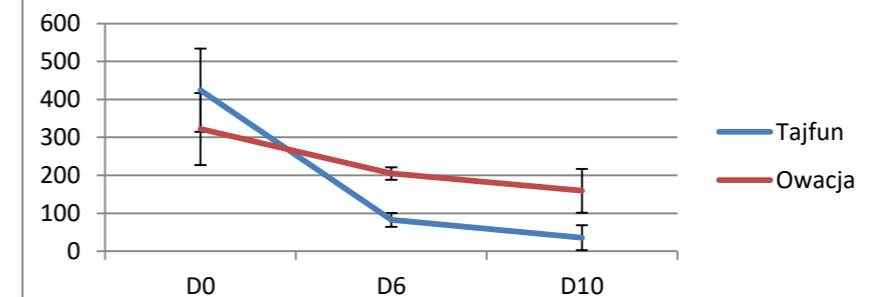

PGSC0003DMG400030995

PGSC0003DMG400031031 642,67 256 162,67 475,33 73,33 62,67 140,43 13,11 19,01 44,29 22,3 11,37

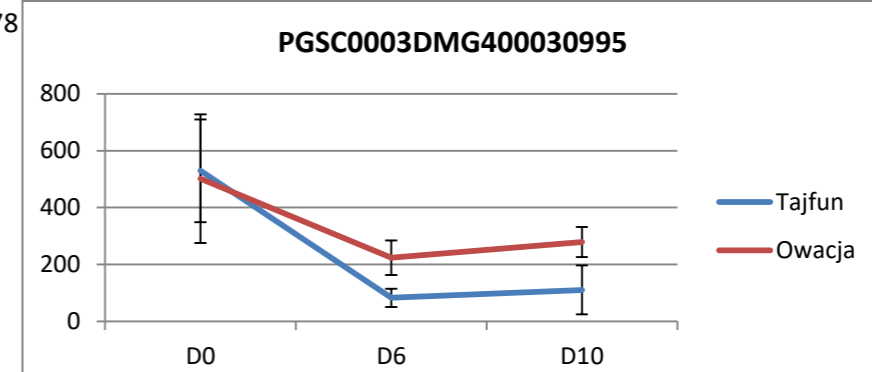

PGSC0003DMG400031031

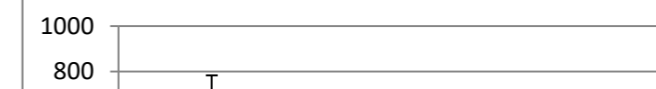

PGSC0003DMG400031079 359,33 47,33 18 358,67 128,67 140 127,32 20,23 8,72 172,62 60,01 33,05

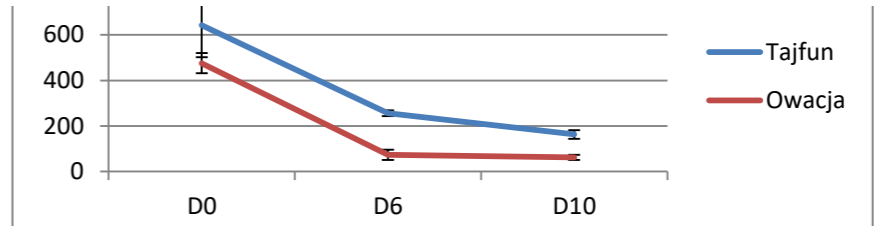

PGSC0003DMG400031079

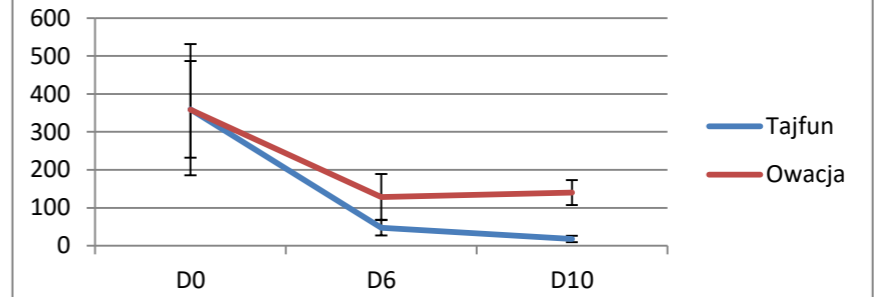

PGSC0003DMG400031081

PGSC0003DMG400031081 5654 3916 2504,67 4730,7 5284,7 7142,7 1010 353,41 1597,18 1531 396,08 1716,4

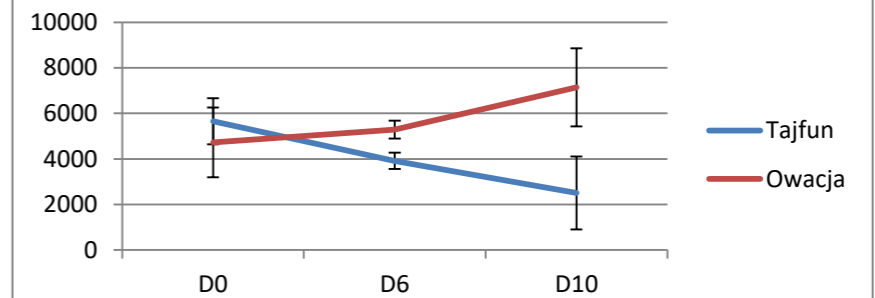

PGSC0003DMG400031248

PGSC0003DMG400031248 1913,3 1178 844,67 2138,7 2204 1678 555,37 422,79 244,82 1244,8 508,41 248,14

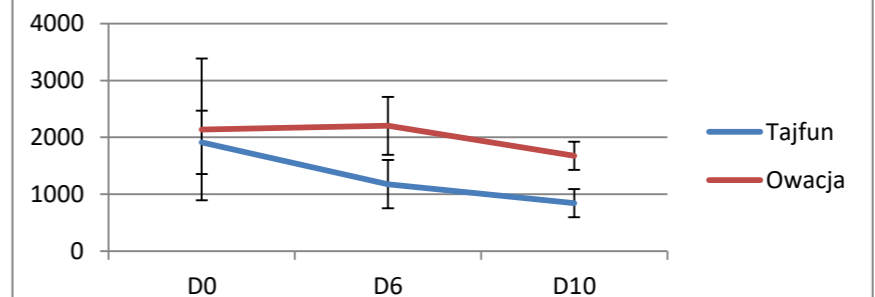

PGSC0003DMG400031262

PGSC0003DMG400031262 1126 420 362 906 628 1129,3 321,04 116,57 12,17 244,1 68,79 71,06

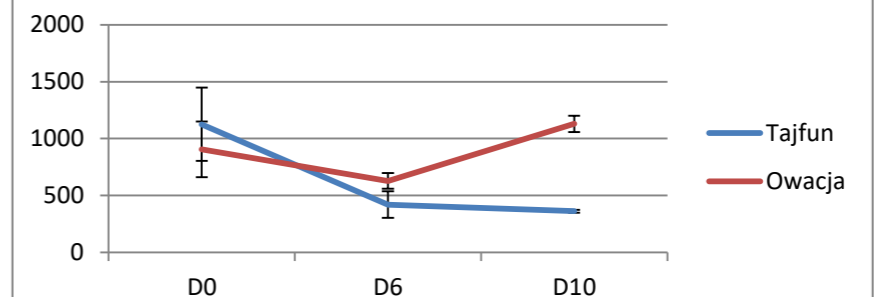

PGSC0003DMG400031842

PGSC0003DMG400031842 965,33 36,67 26,67 876,67 98,67 265,33 335,57 19,73 20,43 424,83 11,72 89,11

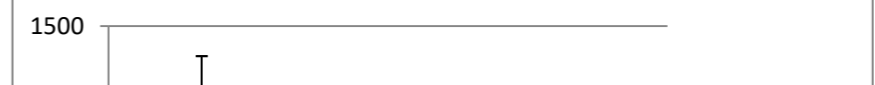



PGSC0003DMG400032537 496 167,33 204 484 576,67 330,67 84,29 22,74 101,49 121,01 91,57 97,99

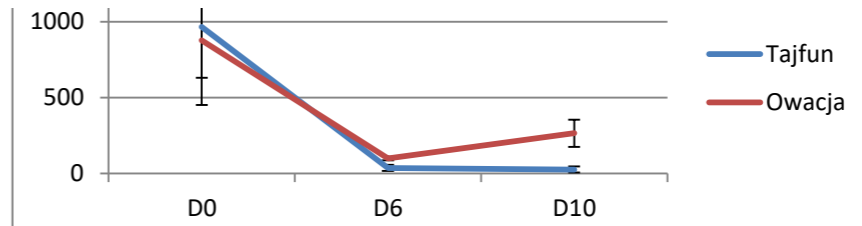

PGSC0003DMG400032537

PGSC0003DMG400033099 5564,7 582 244 9119,3 934 1136,7 2359,9 35,16 30 3207,3 122,57 142,47

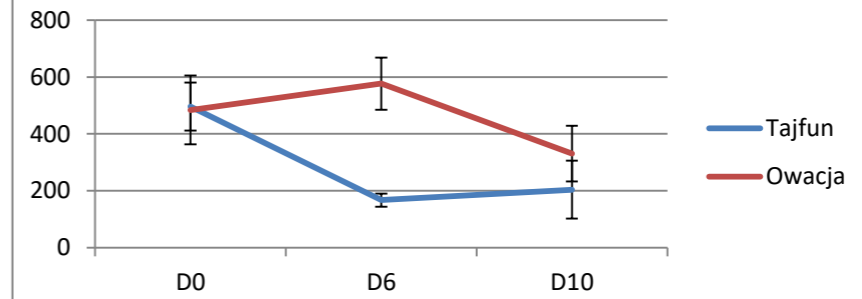

PGSC0003DMG400033099

PGSC0003DMG400035823 724,67 490,67 506,67 836,67 892 1130,7 95,71 63,13 152,45 57,77 76,24 69,12

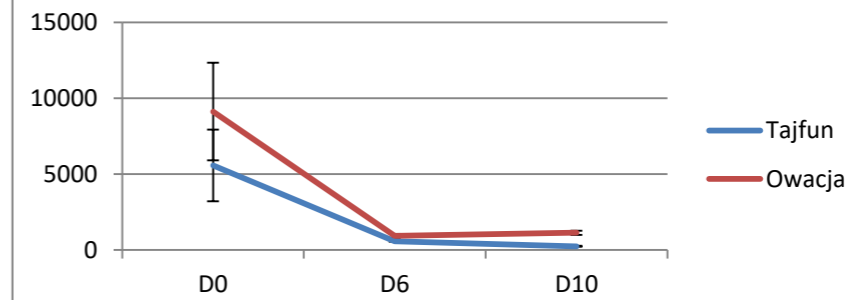

PGSC0003DMG400035823

PGSC0003DMG400044958 4122,7 3594,7 2268 3640,7 2628 1328,7 1164,6 328,94 251,15 1326,2 259,1 216,3

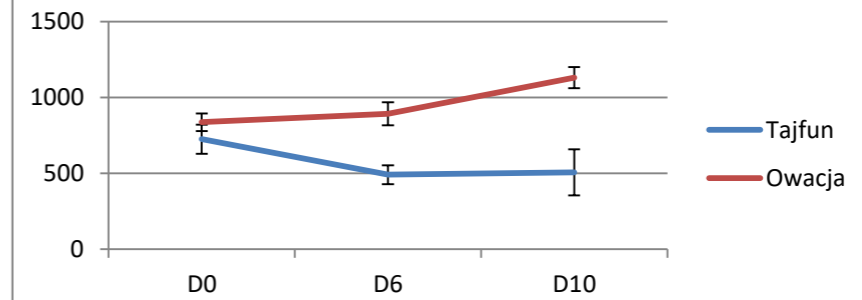

PGSC0003DMG400044958

PGSC0003DMG401004500 206 40 36,67 515,33 127,33 158,67 66 7,21 23,44 321,56 20,53 42,72

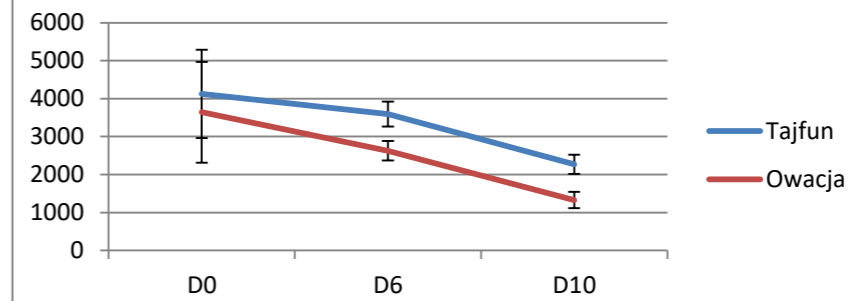

PGSC0003DMG401004500

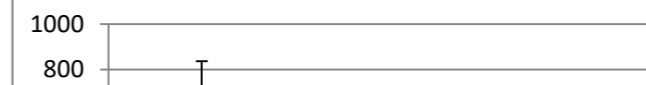

**PGSC0003DMG401004637** 1576,7 686 464 1014,7 990 1024,7 123,16 108,06 32 332,42 129,68 104,89

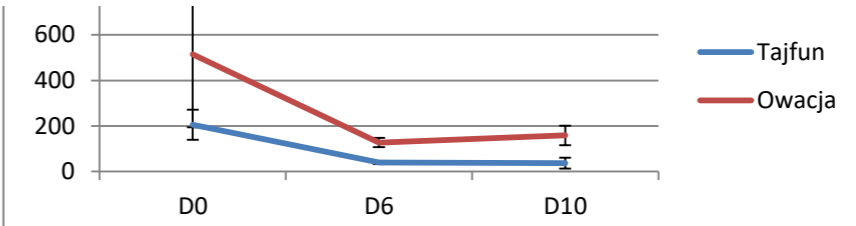

**PGSC0003DMG401004637**

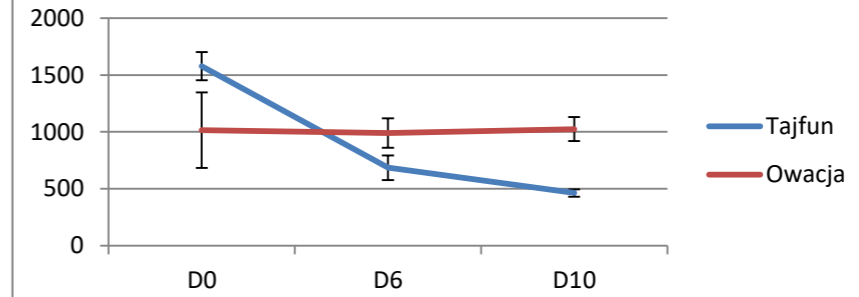

**PGSC0003DMG401004779** 7029 2604 3026 4885,7 1363,7 789,33 1947,6 297,64 386,58 1433,6 313,82 84,25

**PGSC0003DMG401004779**

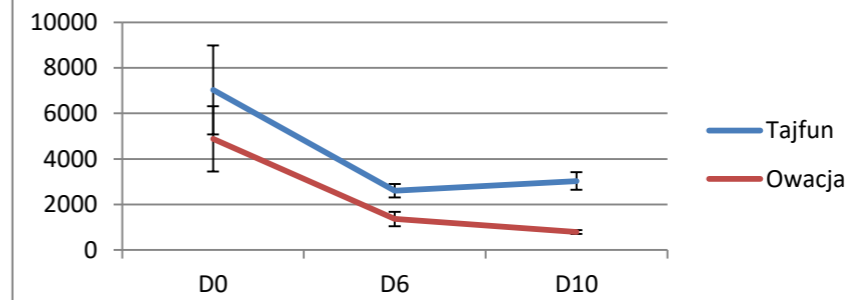

**PGSC0003DMG401012244** 3811,3 1635,3 1282,67 2551,3 3564 3741,3 565,11 224,02 491,39 964,83 533,52 550,93

**PGSC0003DMG401012244**

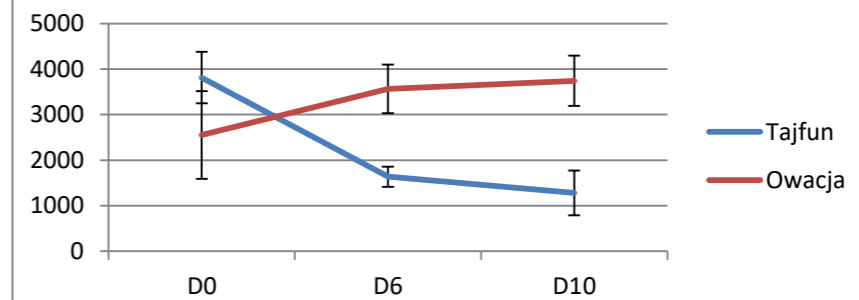

**PGSC0003DMG401013418** 7357,3 2550 1446,67 4409,3 519,33 335,33 1685,1 648,11 753,01 1816,5 125,23 118,5

**PGSC0003DMG401013418**

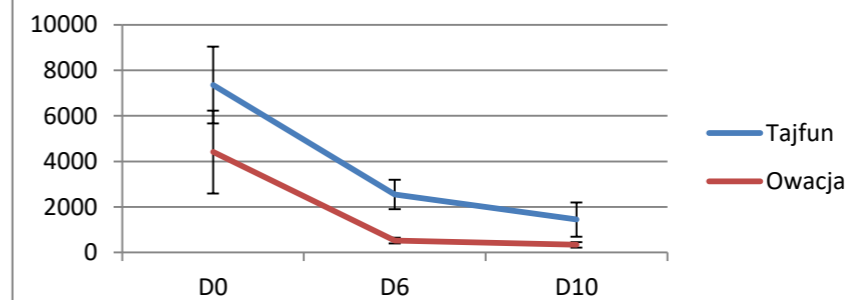

**PGSC0003DMG401015682** 139,33 56 52,67 86 180 170 63,76 15,1 17,24 51,42 70,31 60,4

**PGSC0003DMG401015682**

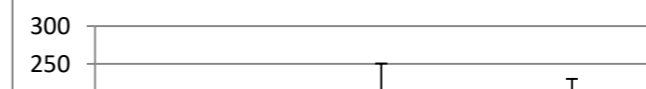

PGSC0003DMG401023562 1986,7 770 298,67 2554,7 409,33 147,33 44,47 290,17 30,09 615,31 134,08 20,03

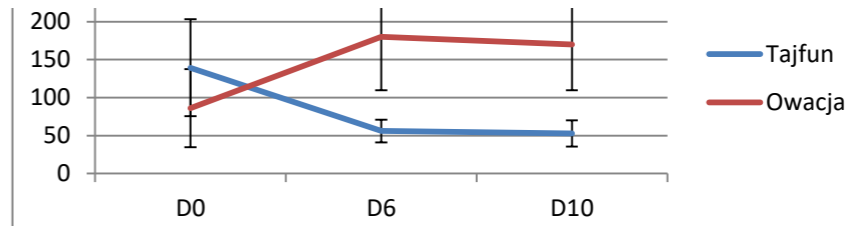

PGSC0003DMG401023562

PGSC0003DMG401025150 13500 2174 1789,33 24122 4286 3100 5113,5 708,38 636,1 7768,3 1448,84 296,18

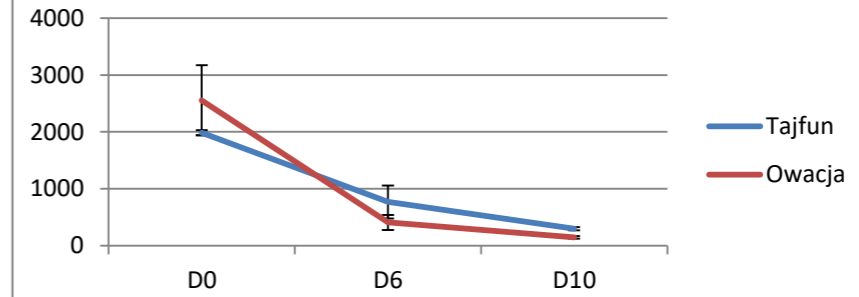

PGSC0003DMG401025150

PGSC0003DMG401025831 61147 13664 7527,33 54346 9376 1096,7 25250 2422,7 4683,62 12574 2480,17 1899,5

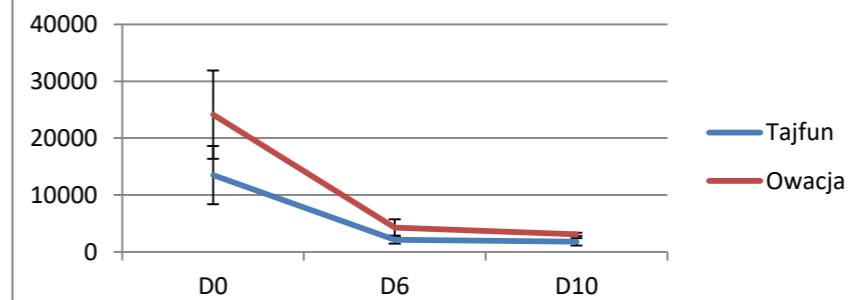

PGSC0003DMG401025831

PGSC0003DMG401026043 136 67,33 37,33 169,33 142,67 77,33 14 21,57 14,47 45,88 58,39 11,55

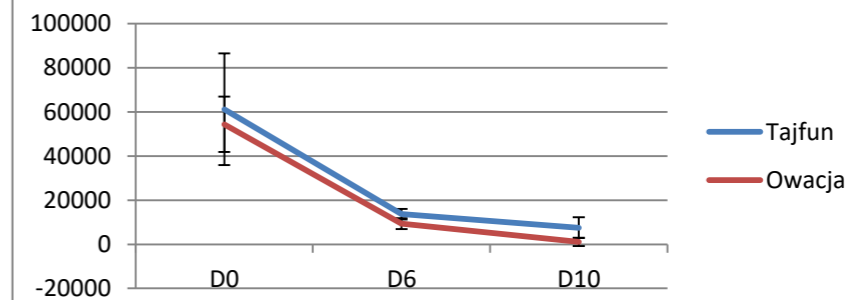

PGSC0003DMG401026043

PGSC0003DMG401031741 1448 917,33 419,33 1002,7 1260,7 174,67 333,15 235,84 108,71 497,78 105,31 33,61

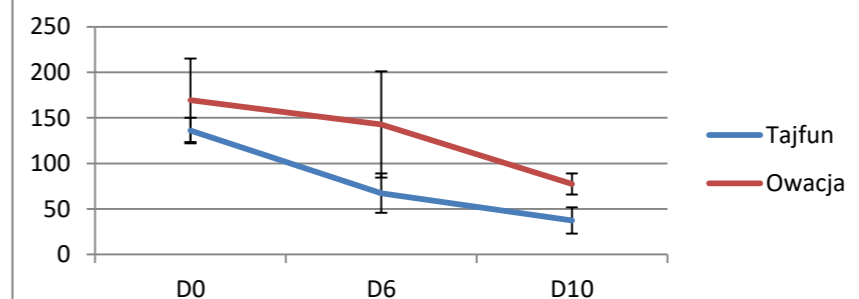

PGSC0003DMG401031741

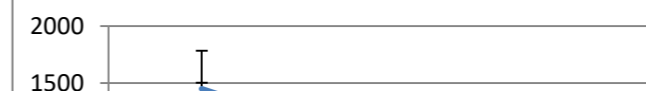

PGSC0003DMG402002542 638,67 510,67 471,33 774,67 736 819,33 34,02 86,63 55,22 89,94 63,02 154,61

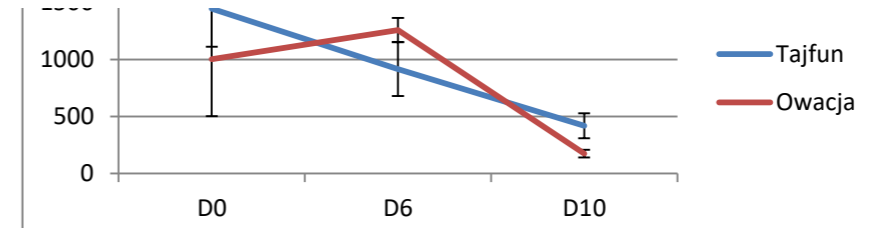

PGSC0003DMG402002542

PGSC0003DMG402003286 14164 6425 1692 9309,7 3638 408,67 1349,7 1024,4 461,18 3067,4 437,73 62,32

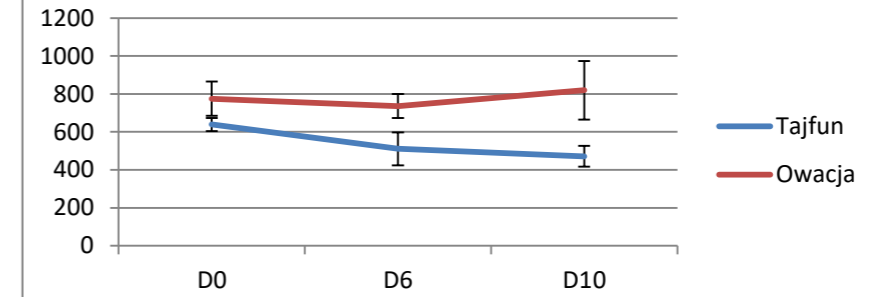

PGSC0003DMG402003286

PGSC0003DMG402004120 1330,7 823 676,67 1429,7 1444 1429,7 270,94 118,9 126,26 251,95 136,57 138,44

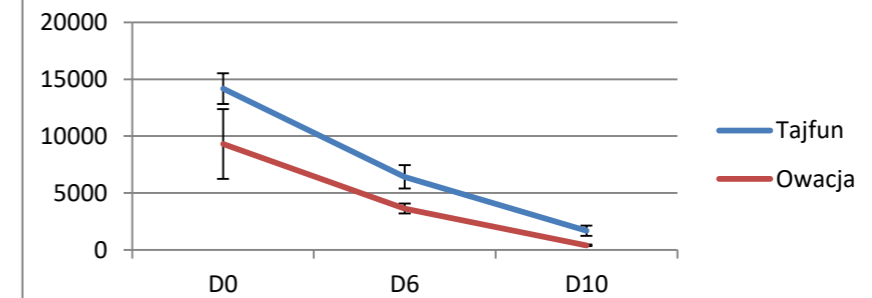

PGSC0003DMG402004120

PGSC0003DMG402010056 26340 10164 7093,33 20765 6882,7 2424,7 4375,5 1920,2 2721,07 1443,7 1127,27 117,41

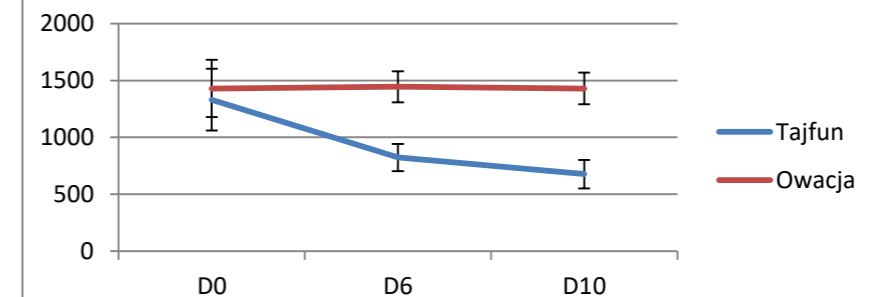

PGSC0003DMG402010056

PGSC0003DMG402014796 4173,3 3110,7 2778 5358,7 4480,7 4166,7 261,6 611,23 1064,16 467,92 440,08 277,45

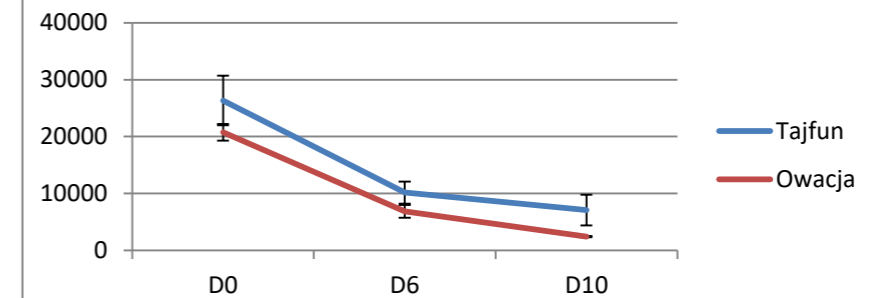

PGSC0003DMG402014796

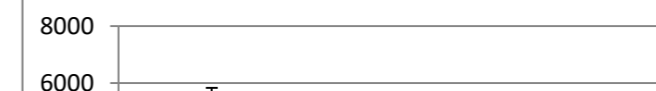

PGSC0003DMG402015926 3180 1423,3 525,33 2560 1962 954 605,28 177,86 216,82 697,11 133,1 122

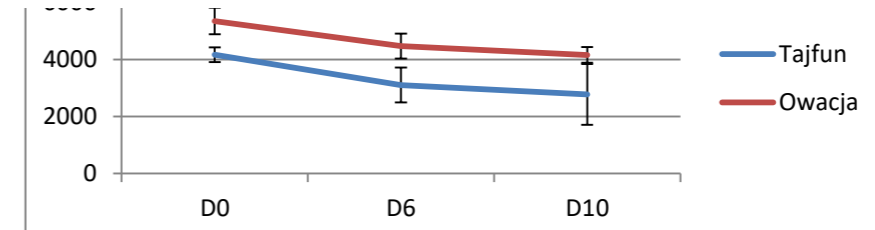

PGSC0003DMG402015926

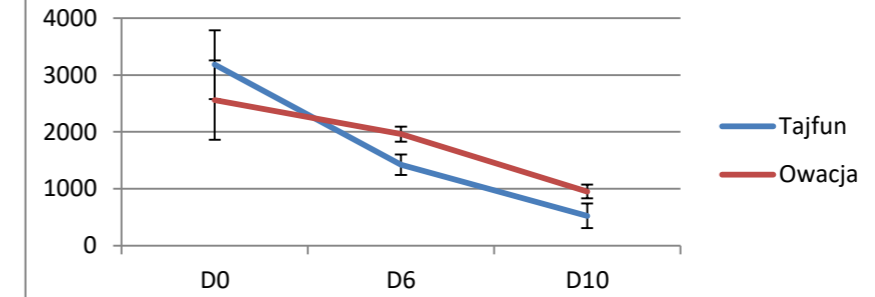

PGSC0003DMG402019151 6645,3 3599,3 2640 5761,3 2338 1534 1109,7 598,14 210,27 243,49 687,24 52

PGSC0003DMG402019151

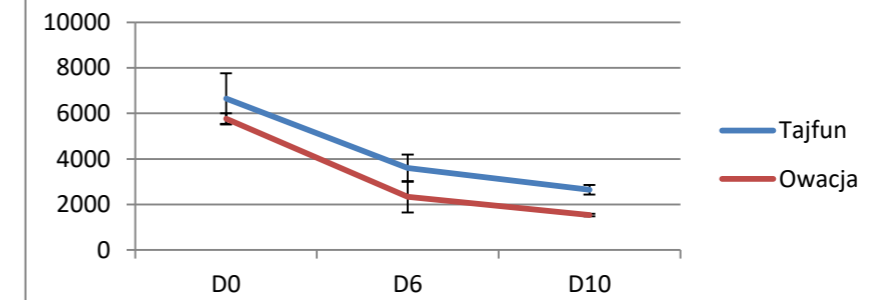

PGSC0003DMG402019982 187,67 54,67 60,67 192,67 112 551,67 69,64 11,37 7,57 128,52 17,44 48,44

PGSC0003DMG402019982

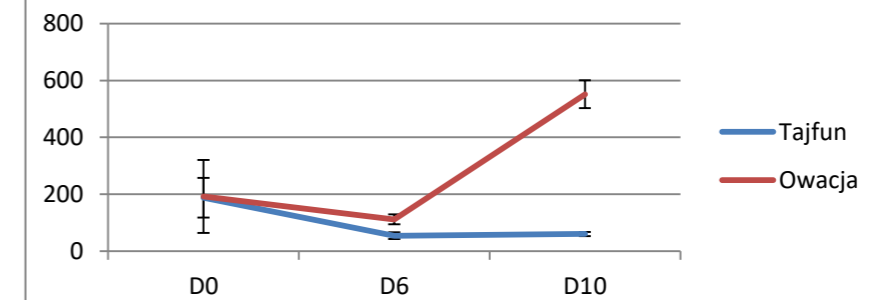

PGSC0003DMG402030822 2927,3 1398 2244 3022 2047,3 4882,7 398,56 98,65 417,43 522,41 79,43 566,47

PGSC0003DMG402030822

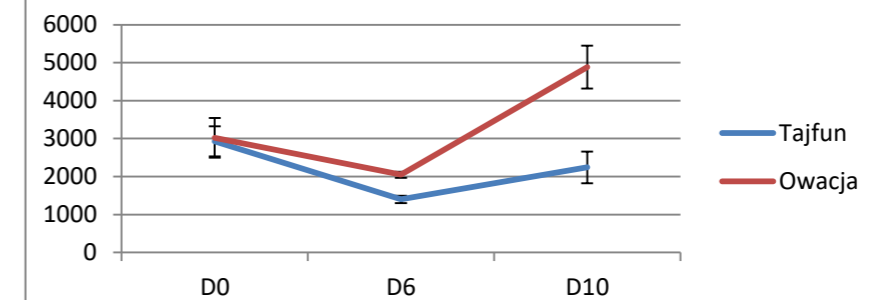

**Table S1** The comparison of normalized number of reads for transcripts derived from genes searched out in the first round of selection (594 genes) during the time course of drought experiment. The gray color indicates the selected genes after the second round of selection.

Mean value of normalised reads per million for selected potato transcripts that were up-regulated in Gwiazda comparing to Oberon. Data are shown for days: 0, 6, and 10 of drought experiment and were taken from three biological replicates. SD at D0 was always not statistically significant ( $P > 0,05$ ), while SD at D6 and D10 were always statistically significant ( $P < 0,05$ , see also Fig 5). Potato gene accession numbers were taken from Spud DB ([www.potato.plantbiology.msu.edu](http://www.potato.plantbiology.msu.edu)). SD - standard deviations.

| Gene accession numbers | Gwiazda reads mean value |        |        | Oberon reads mean value |         |        | Gwiazda SD |        |         | Owacja SD |        |         |
|------------------------|--------------------------|--------|--------|-------------------------|---------|--------|------------|--------|---------|-----------|--------|---------|
|                        | D0                       | D6     | D10    | D0                      | D6      | D10    | D0         | D6     | D10     | D0        | D6     | D10     |
| PGSC0003DMG400001181   | 56,67                    | 1344,7 | 10047  | 51,33                   | 2554,67 | 6480   | 36,46      | 390    | 1385,43 | 42,72     | 371,07 | 1841,31 |
| PGSC0003DMG400001621   | 39,33                    | 651,33 | 284,67 | 8,67                    | 270     | 105    | 24,03      | 243,64 | 44,06   | 13,32     | 130,95 | 26,87   |
| PGSC0003DMG400002484   | 220,67                   | 628,33 | 613    | 251,33                  | 1109,33 | 1326,5 | 35,39      | 240,14 | 93,5    | 54,37     | 103,27 | 47,38   |
| PGSC0003DMG400003079   | 195,33                   | 436,67 | 971,33 | 272,67                  | 789,33  | 1495   | 28,02      | 67,66  | 142,9   | 16,17     | 328,68 | 97,58   |
| PGSC0003DMG400003978   | 394,67                   | 617,33 | 1011,3 | 355,33                  | 254,67  | 627    | 143,53     | 126,21 | 227,74  | 164,76    | 134,53 | 100,41  |

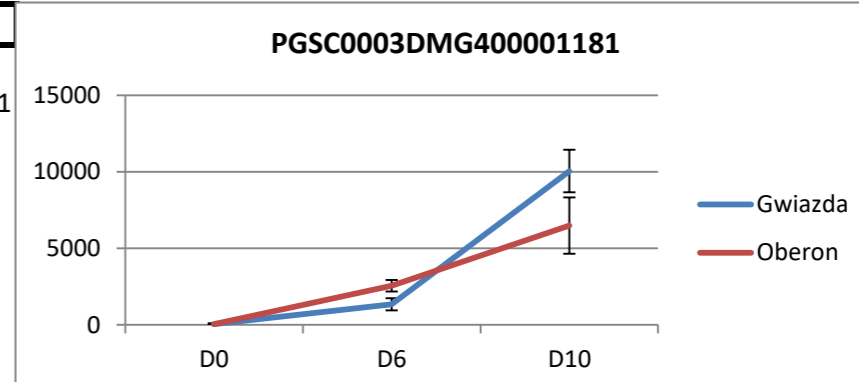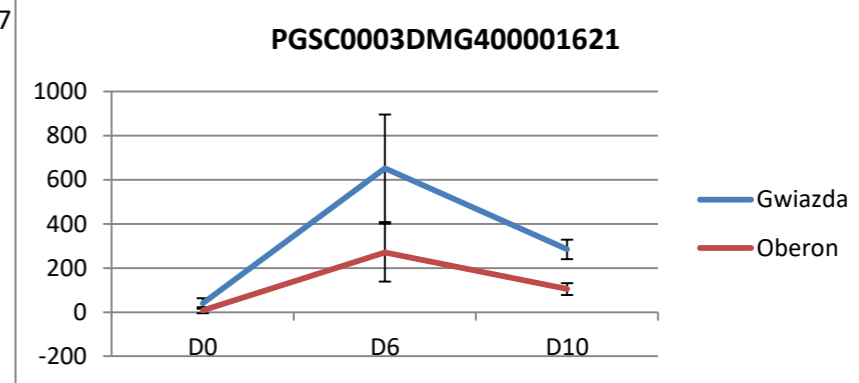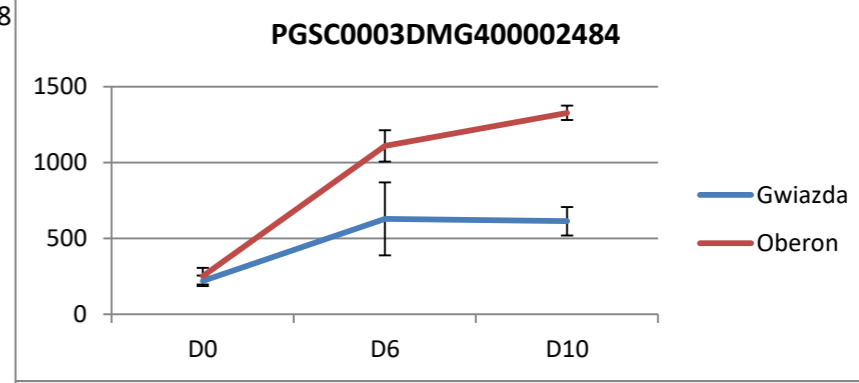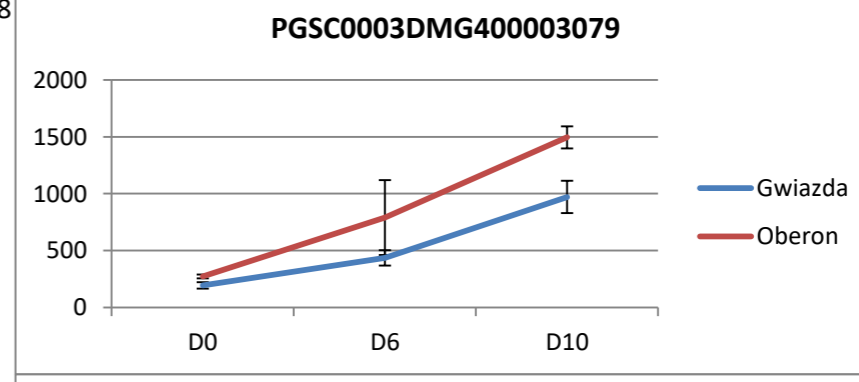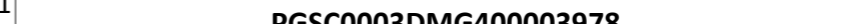

PGSC0003DMG400006221 333,33 590 916 418,67 1243,33 2042 61,78 131,19 117,12 60,14 266,19 489,32

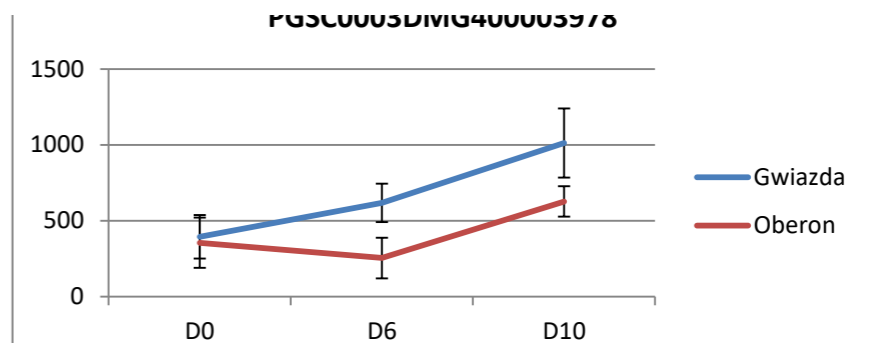

PGSC0003DMG400006796 575,33 1474,7 1169,3 402,67 742 536,5 241,93 143,87 215 73,33 213,04 19,09

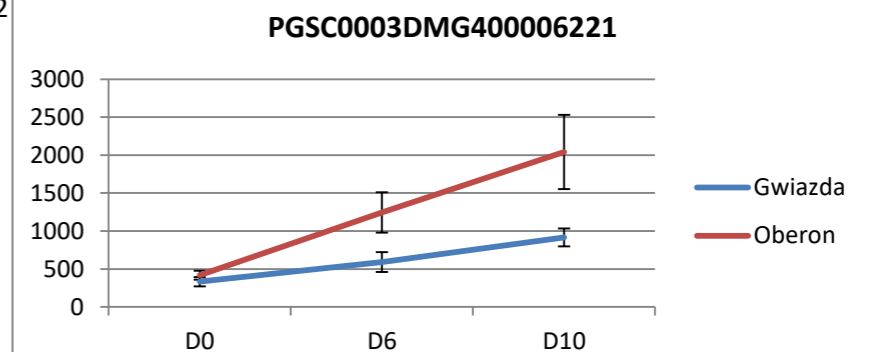

PGSC0003DMG400006797 2226,33 4478 3774,3 2181 2517,33 1642 759,96 321,27 432,03 512,59 801,07 15,56

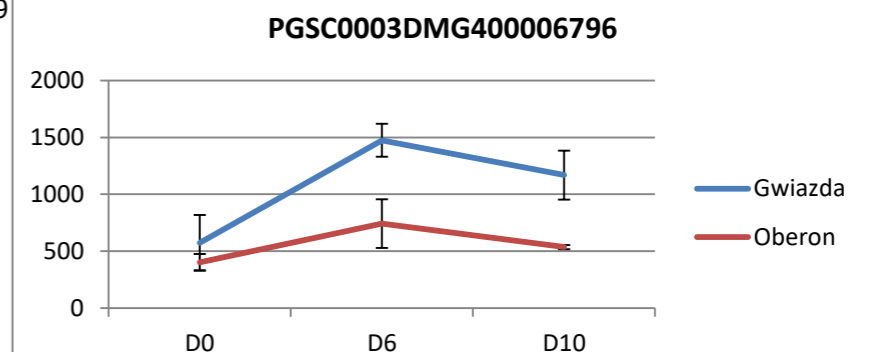

PGSC0003DMG400007109 30,67 132 110 11,33 39,33 41 7,02 39,85 29,87 7,02 33,55 12,73

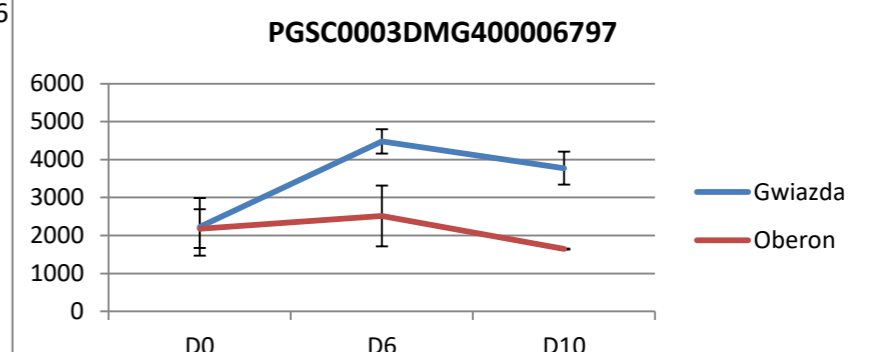

PGSC0003DMG400007597 54 243,33 279,33 92,67 98 141 29,05 45,45 35,8 93,39 69,2 46,67

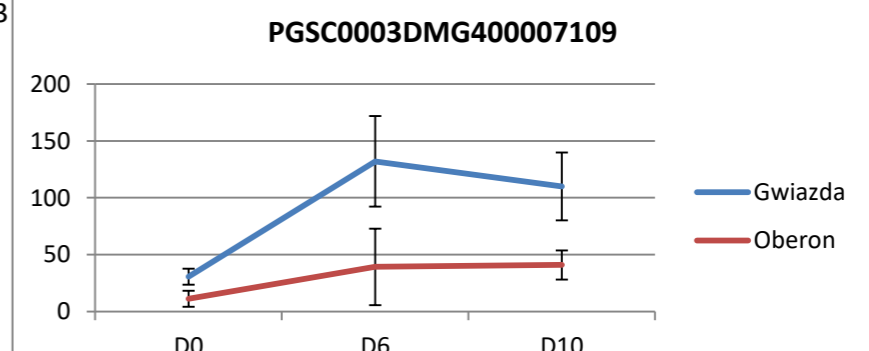

PGSC0003DMG400007597

PGSC0003DMG400007752 170 315,33 535,33 85,33 148,67 280 52 45,71 91,53 11,02 32,88 45,25

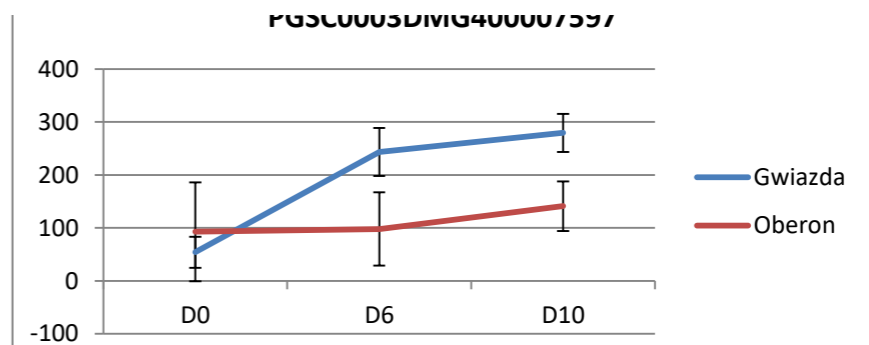

PGSC0003DMG400008164 19,33 833,33 1064 2 406 581 3,06 412,82 286,19 3,46 74,32 100,41

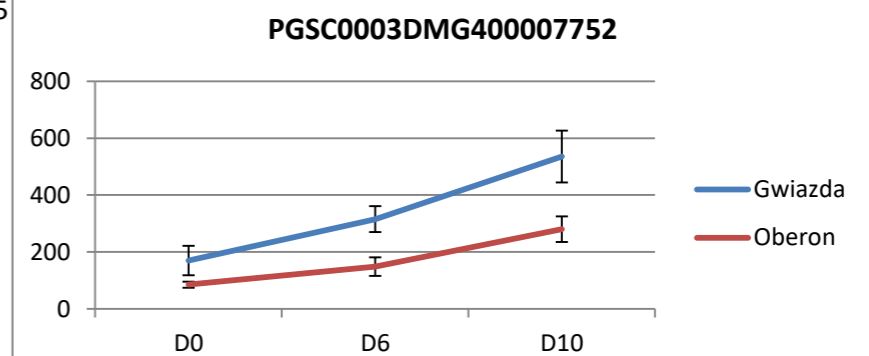

PGSC0003DMG400008833 774 2652,7 2398 433,33 1324,67 903 213,23 726,39 140,76 121,17 224,9 9,9

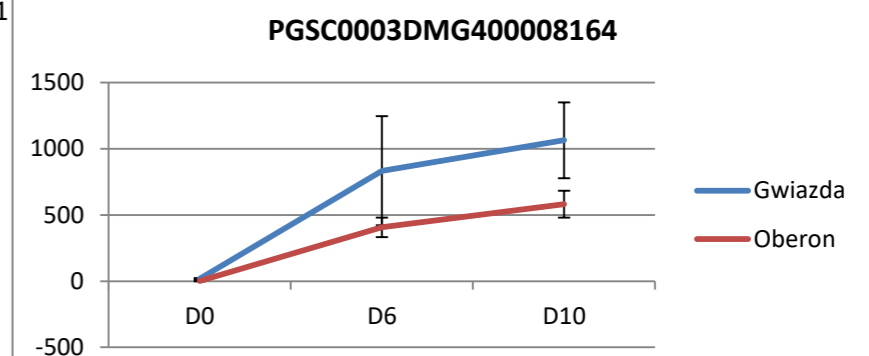

PGSC0003DMG400010065 3506,67 5636 8460 3279,3 3064 5273 2188,34 285,51 1807,75 914,79 1243,41 482,25

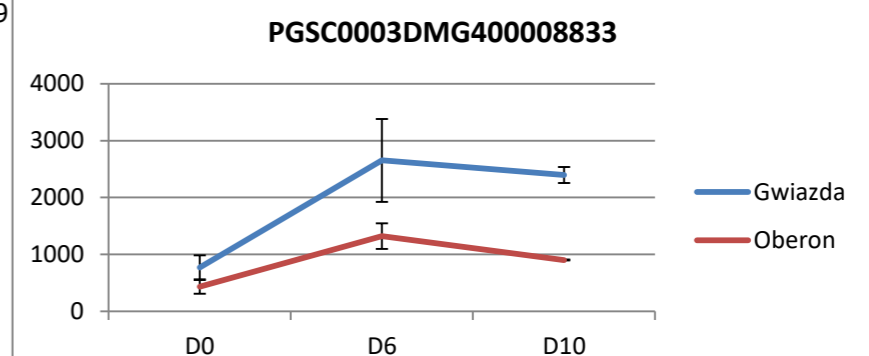

PGSC0003DMG400010172 3,33 332 214 2,67 152 53 4,16 119,26 47,29 3,06 35,38 1,41

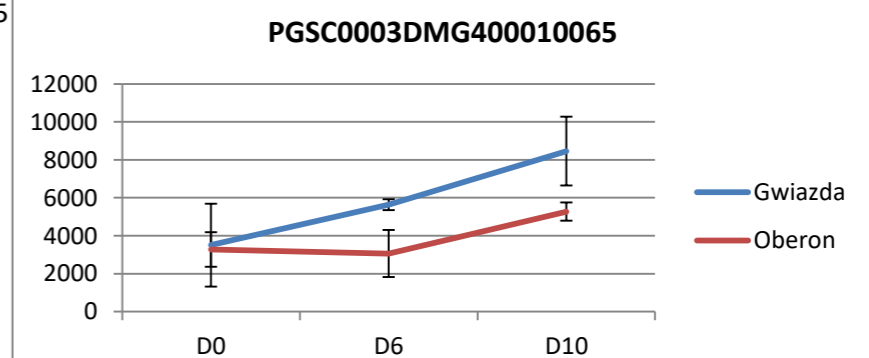



PGSC0003DMG400010740 1983,33 3169,3 6871,7 1703,3 1830 4015 113,74 456,25 719,79 126,02 743,29 250,32

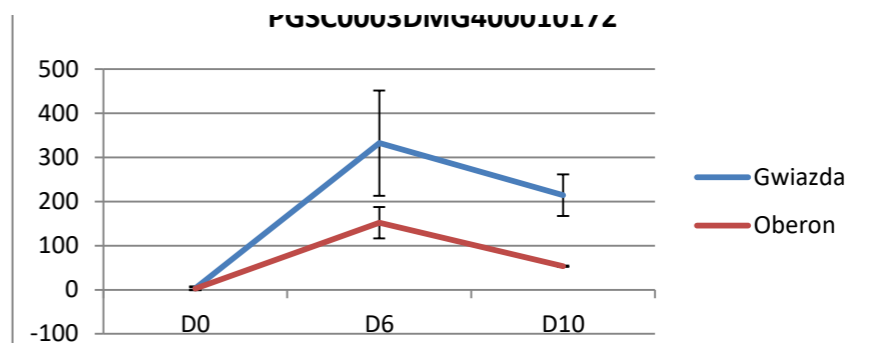

PGSC0003DMG400011208 306,67 3442,7 827,33 189,33 1102,67 447 64,04 1742,87 166,76 59,54 391,22 117,38

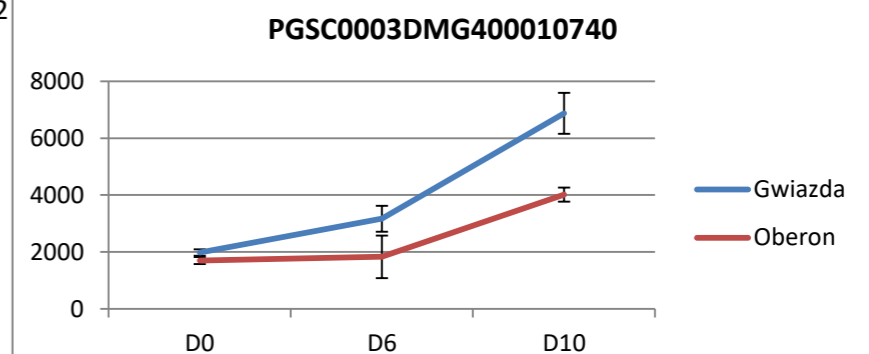

PGSC0003DMG400011630 20,67 218,67 4656,7 42 478,67 12511 9,24 76,27 1052,9 17,78 126,64 3494,52

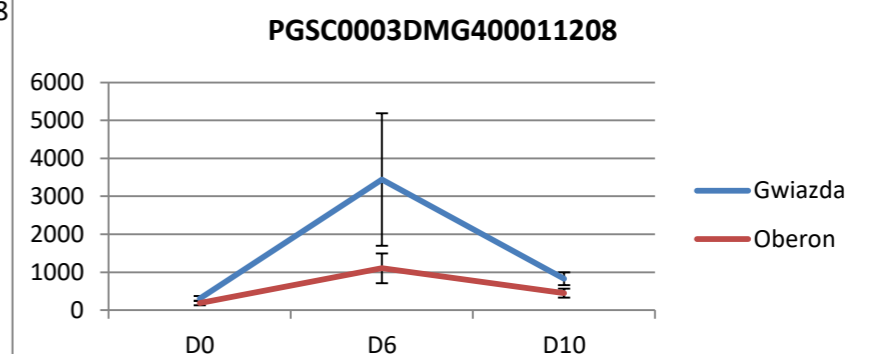

PGSC0003DMG400011704 52 244 228,67 18 86,67 94 8,72 52 23,86 7,21 57,49 0

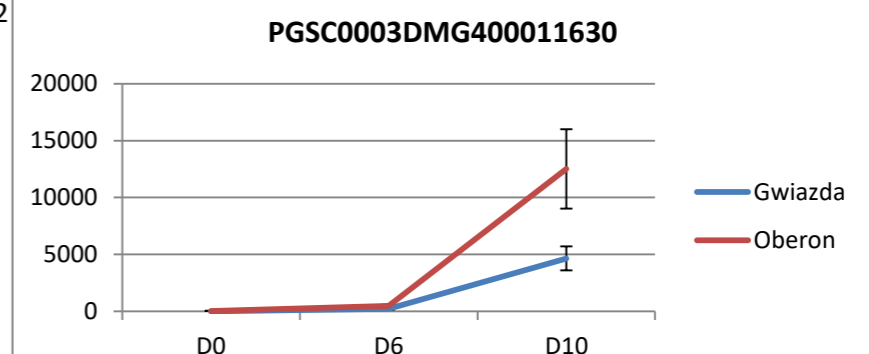

PGSC0003DMG400012166 5305 8882,7 9824,3 6630,7 19694,3 17290 162,15 1848,15 115,52 1192,99 2262,5 401,64

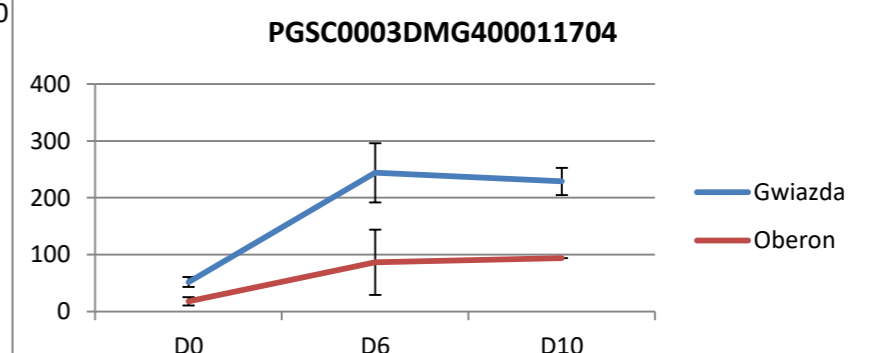

PGSC0003DMG400012166

**PGSC0003DMG400012174** 77,33 10105 4630,7 19,33 4017 2168,5 68,86 4973,46 250,33 17,01 2451,5 526,79

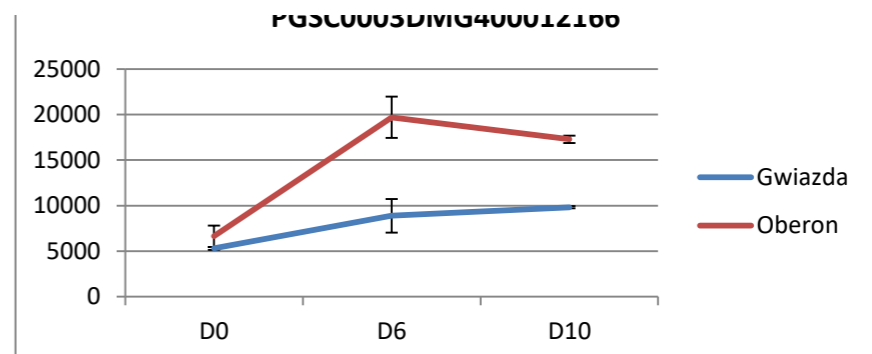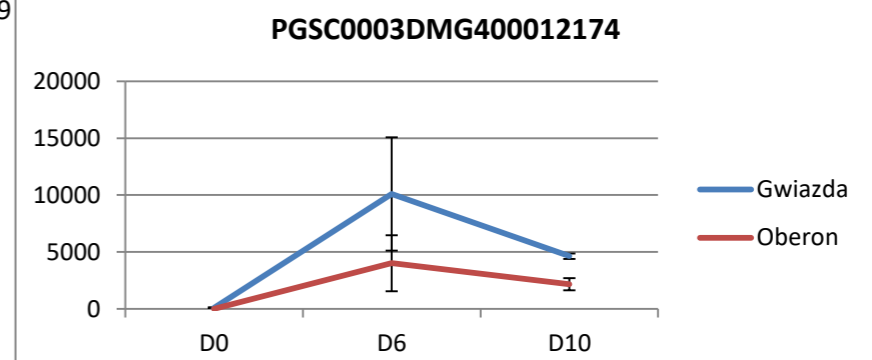

**PGSC0003DMG400012819** 260,67 488 581,33 147,33 146 270 54,01 160,36 59,41 147 126,76 16,97

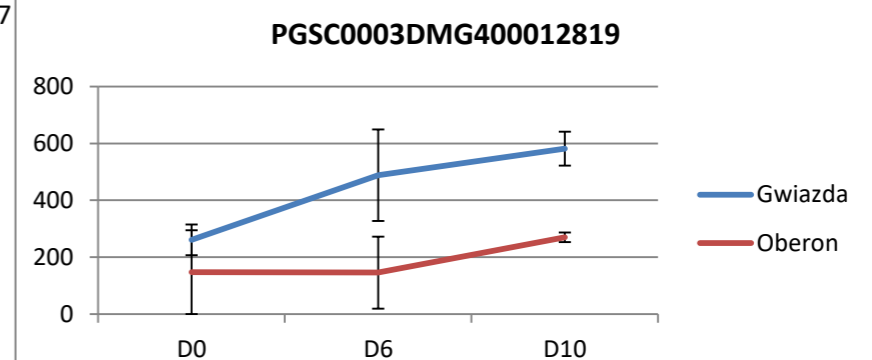

**PGSC0003DMG400013977** 54,67 230,67 126,67 22 48 56 37,65 155,31 31,01 20,3 6,93 0

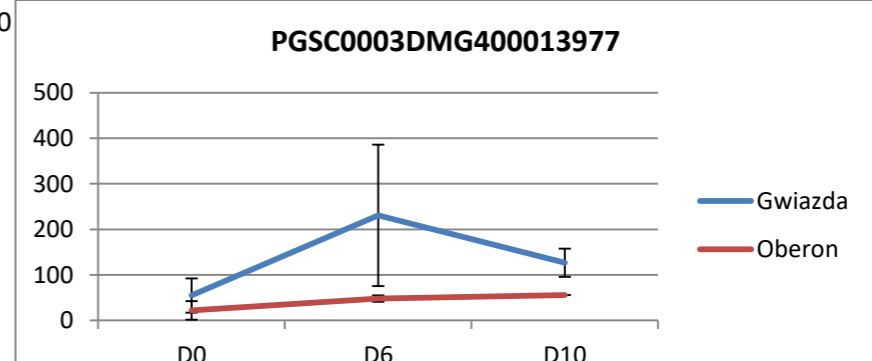

**PGSC0003DMG400014174** 339,33 1033,3 1116,7 340,67 600 620 114,13 81,05 326,86 53,15 187,29 48,08

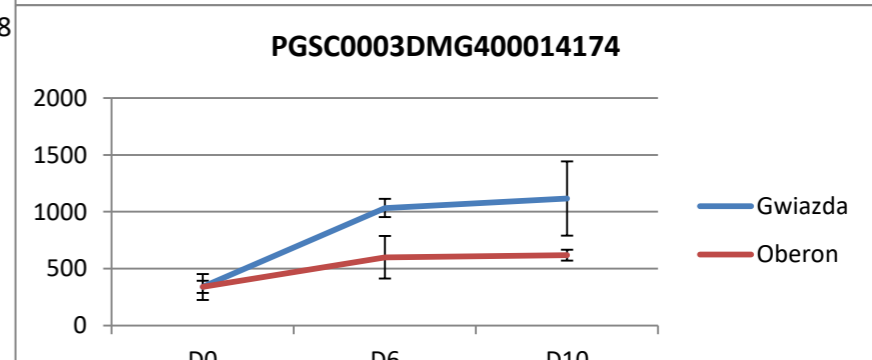

**PGSC0003DMG400014226** 116,67 375,33 228,67 84 92,67 102 24,11 35 49,69 73,73 84,06 33,94

**PGSC0003DMG400014226**

**PGSC0003DMG400014293** 179,33 34411 7558,7 24,67 9750,67 2654 158,31 14909,4 1139,27 16,17 981,43 675,99

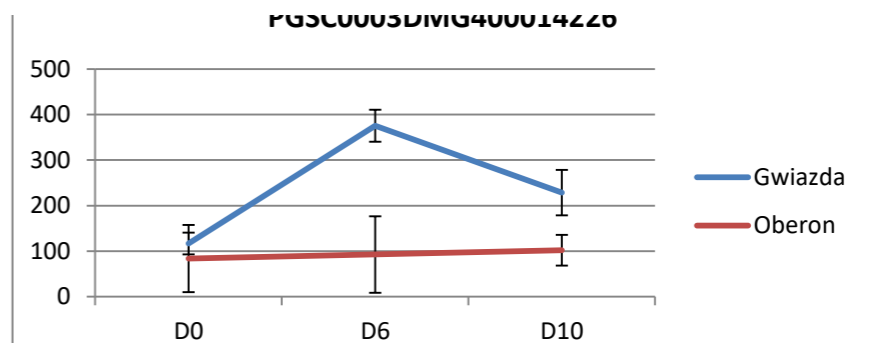

**PGSC0003DMG400014449** 38 142 122 14 31,33 50 18 27,78 52 6 20,82 2,83

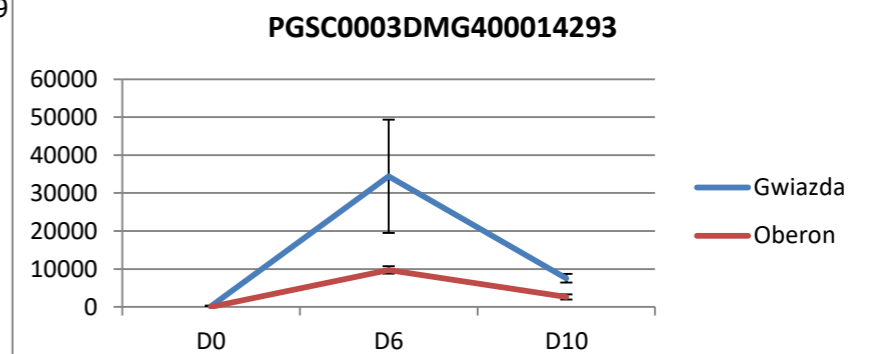

**PGSC0003DMG400015019** 15,33 198 258 10,67 89,33 100 23,09 96,99 84,64 5,03 12,06 56,57

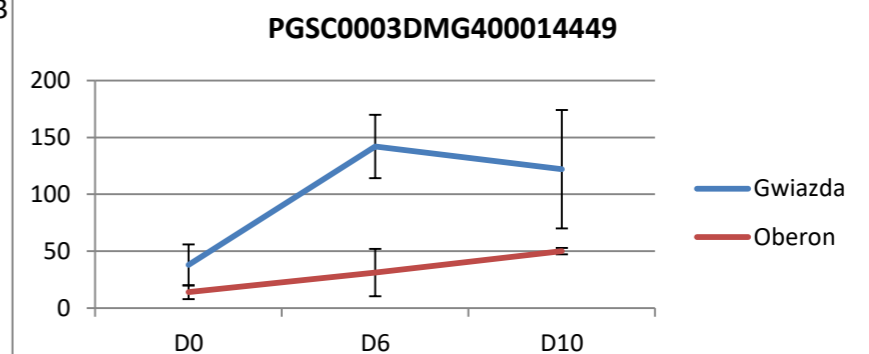

**PGSC0003DMG400016032** 2,67 58,67 276 4 14 6 4,62 23,01 167,61 4 15,87 5,66

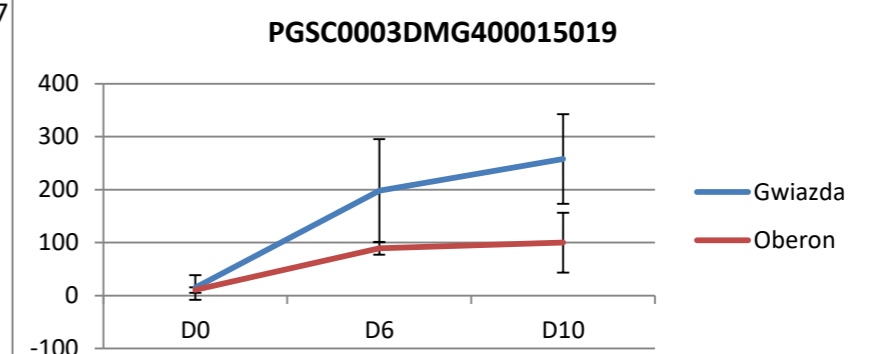

**PGSC0003DMG400016462** 44 477,33 266 8 74 0 76,21 36,02 97,08 13,86 69,54 0

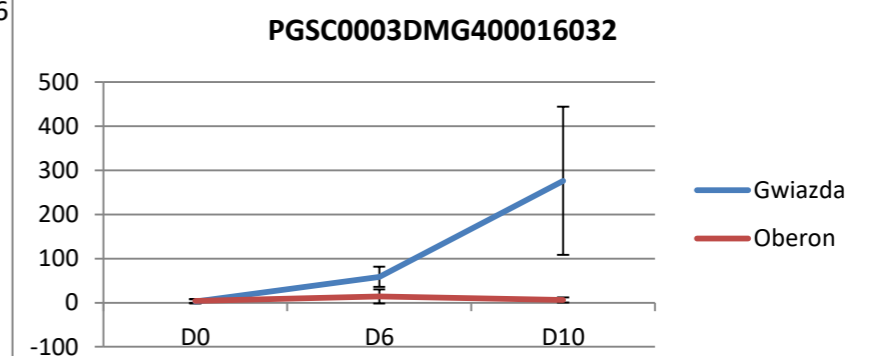

**PGSC0003DMG400016462**

PGSC0003DMG400016765 13,33 496,67 141,33 4,67 1708 321 21,39 305,67 41,1 6,43 674,61 29,7

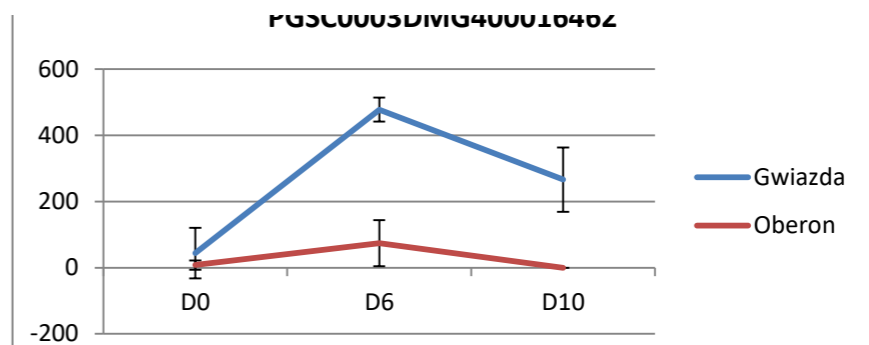

PGSC0003DMG400017098 1,33 46,67 627,33 1,33 8 126 1,15 33,01 275,23 1,15 2 82,02

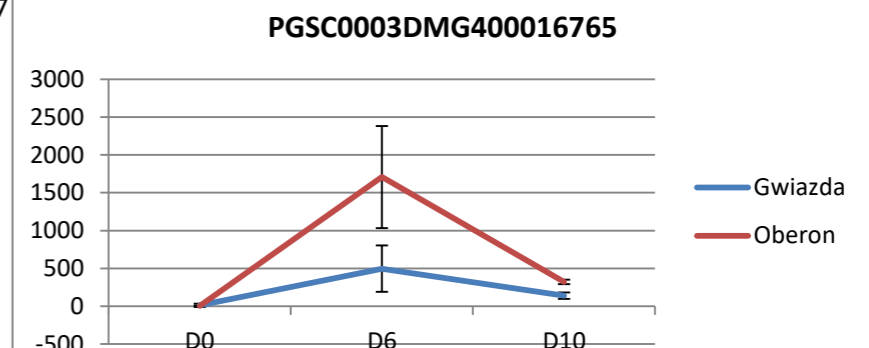

PGSC0003DMG400018116 91,33 321,33 218 45,33 112,67 107 22,12 43 7,21 24,03 40,86 21,21

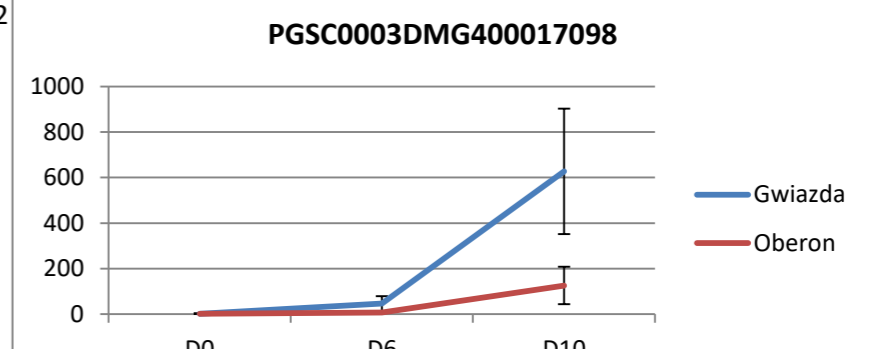

PGSC0003DMG400018236 4606,67 13853 17632 3239,3 5791,67 8150 375,3 6889,19 702,93 805,99 683,36 545,89

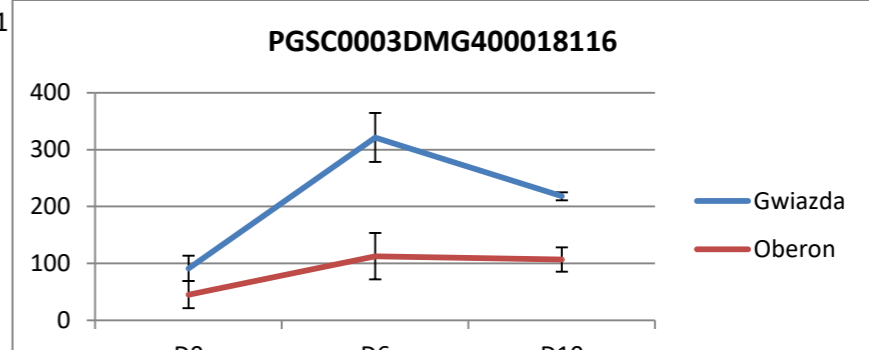

PGSC0003DMG400018616 644 3144 6009,3 416 1735,33 3591 71,02 1143,83 816,14 19,08 1022,59 182,43

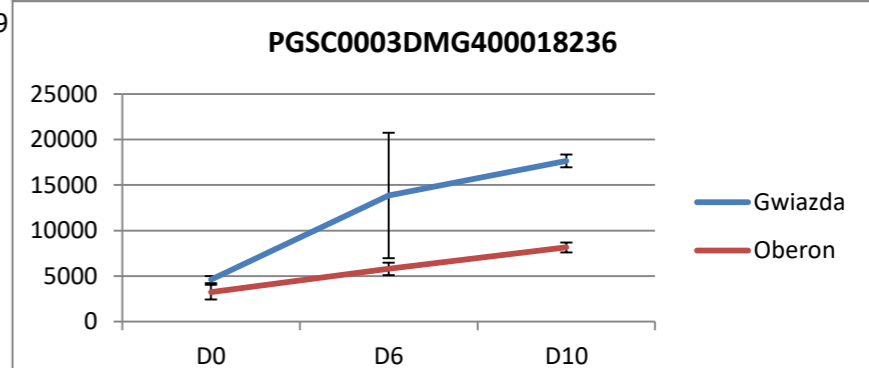

PGSC0003DMG400018616

**PGSC0003DMG400019944** 88 460 2128 181,33 900,67 5097 26,91 204,66 353,65 163,15 316,89 15,56

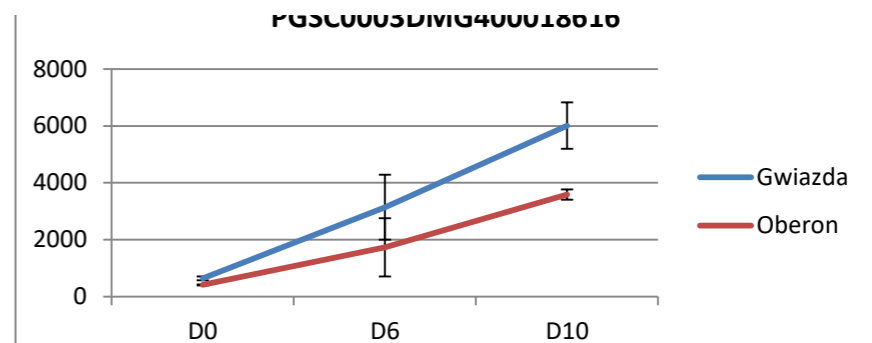

**PGSC0003DMG400019976** 0,67 329,33 226,67 0 137,33 26 1,15 166,1 87,85 0 26,86 2,83

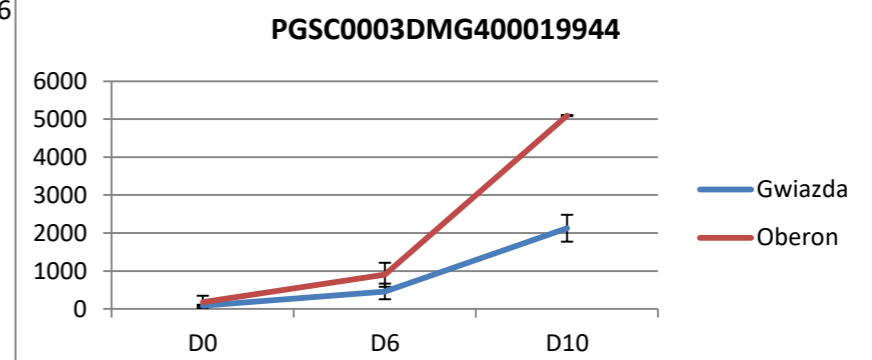

**PGSC0003DMG400020708** 700 2489,3 3800,7 438 922,67 2042 269,14 510,12 1052,92 151,95 277,87 562,86

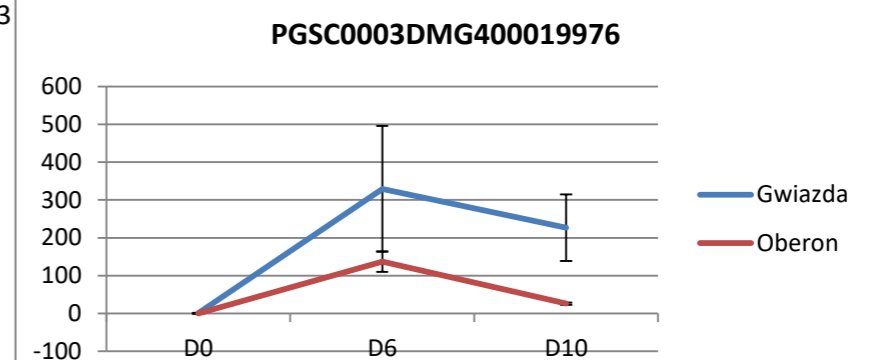

**PGSC0003DMG400022056** 12 138 232 2,67 17,33 31 6 79,9 49,03 3,06 8,33 18,38

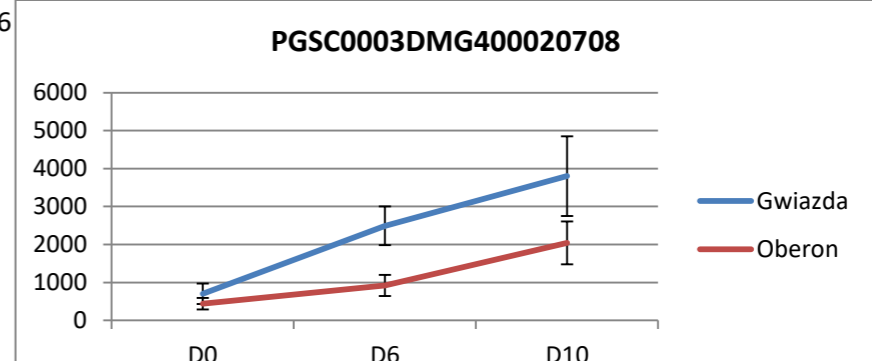

**PGSC0003DMG400022591** 57,33 347,33 228,67 18 124 99 5,03 145,18 71,45 6 69,54 21,21

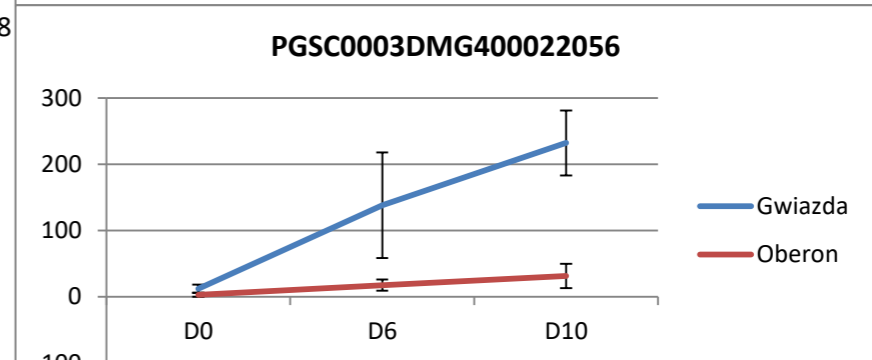

**PGSC0003DMG400022591**

**PGSC0003DMG400024849** 17,33 1072,7 316 0 266,67 119 30,02 735,62 27,78 0 89,47 60,81

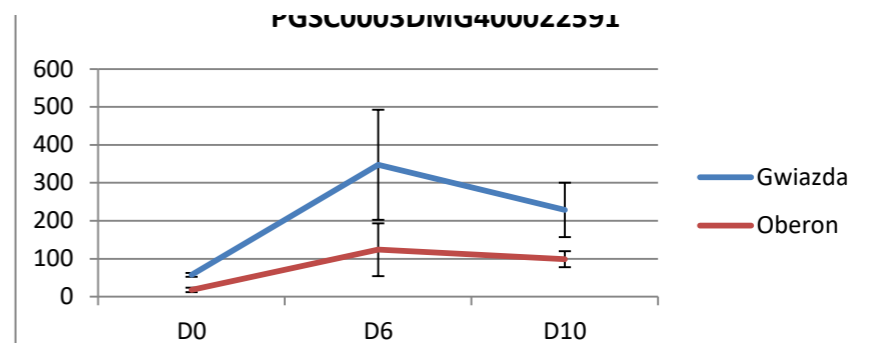

**PGSC0003DMG400025029** 72 160,67 180 32,67 64,67 90 68,35 47,38 15,1 30,35 59,14 25,46

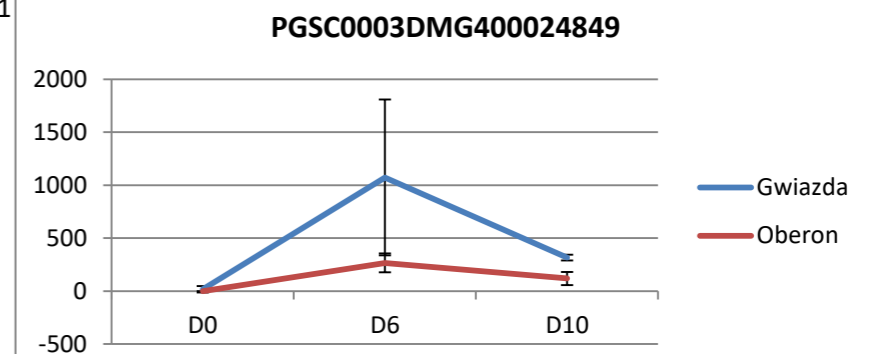

**PGSC0003DMG400025299** 65,33 568 780,67 42,67 1183,33 1749 22,12 78 101,12 18,04 333,01 77,78

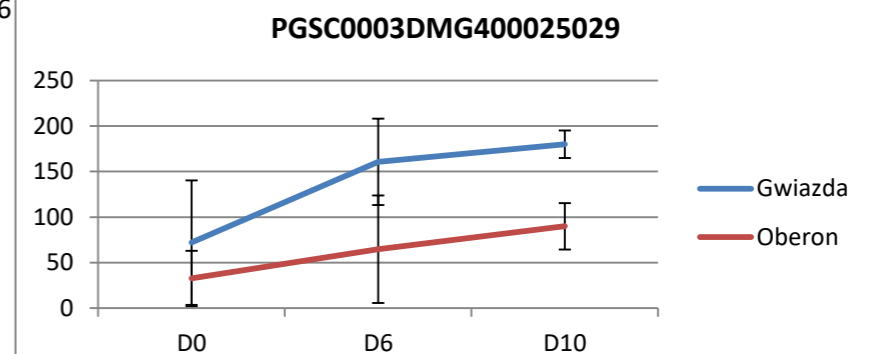

**PGSC0003DMG400026229** 54,67 134,67 208 68 418 480 32,88 28,31 45,74 24,58 220,03 25,46

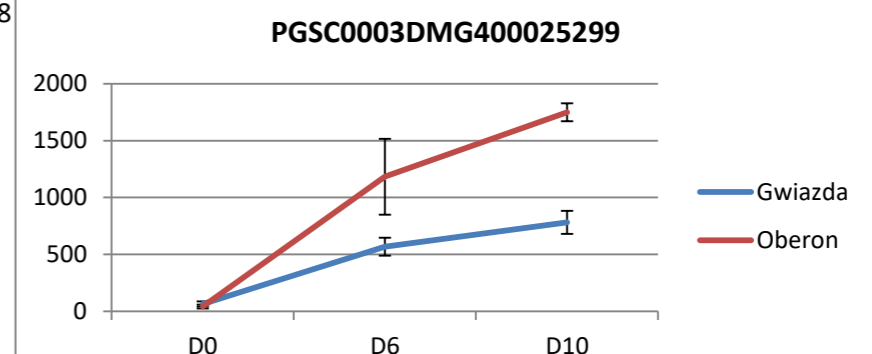

**PGSC0003DMG400027143** 591,33 1363,3 5393,7 524 438 3194,5 150,43 250,65 428,94 223,17 62,48 309,01

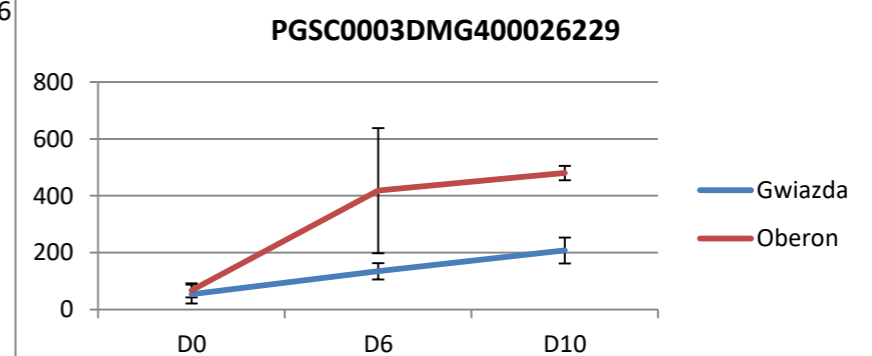

**PGSC0003DMG400027143**

PGSC0003DMG400027839 354 879,33 2266 354 4409,33 3611 117,01 443,35 691,78 302,18 826,29 881,06

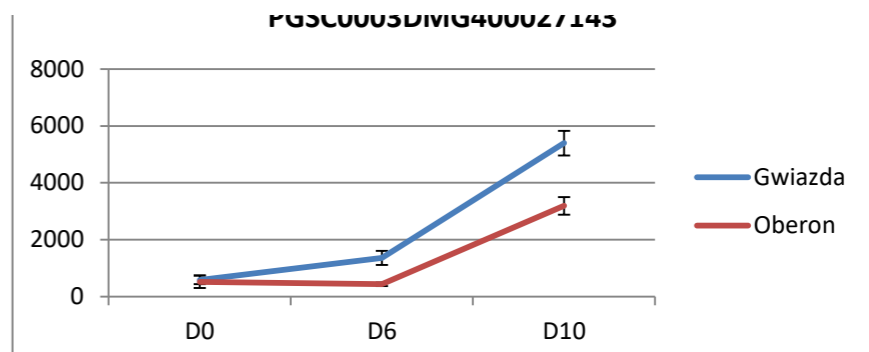

PGSC0003DMG400029618 3649,33 6872,7 11815 3884 12034,7 17711 775,85 3390,8 818,03 555,74 3326,03 1475,02

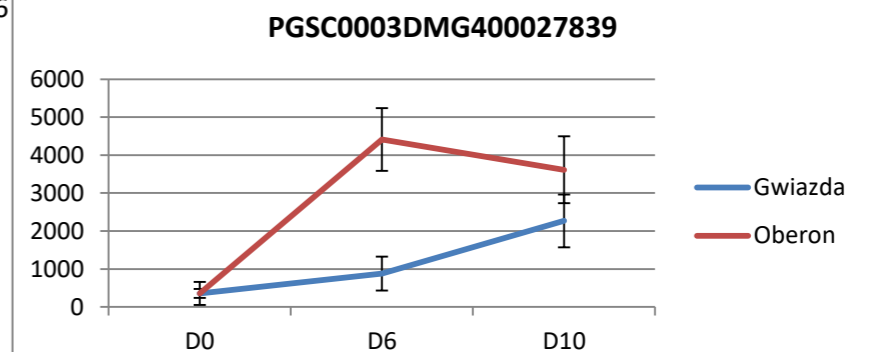

PGSC0003DMG400029706 1,33 140,67 150 0 44,67 35 1,15 64,29 47,16 0 9,87 18,38

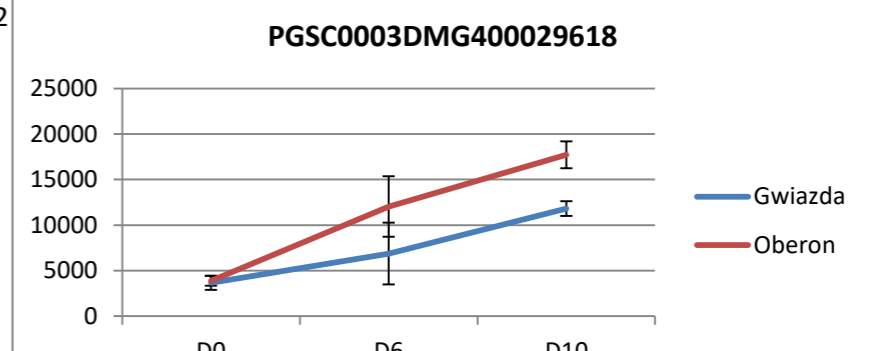

PGSC0003DMG400029822 1019,33 2188,7 2085,3 590,67 701,33 909 641,94 416,08 333,95 239,12 435,37 287,09

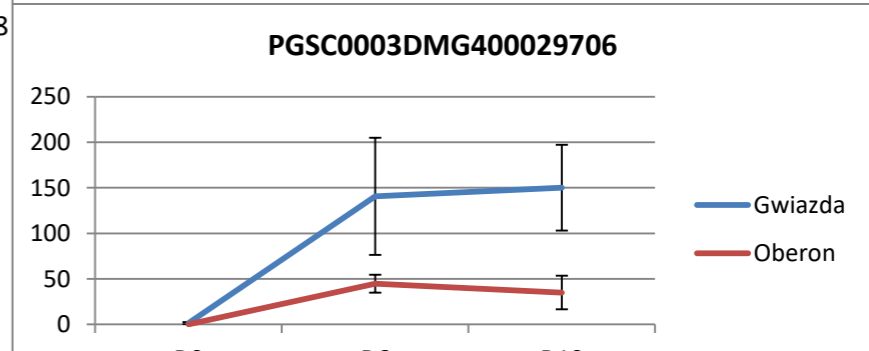

PGSC0003DMG400030427 13,33 116,67 2426 24,67 334 7697 8,33 83,34 408,88 7,57 42,76 2832,67

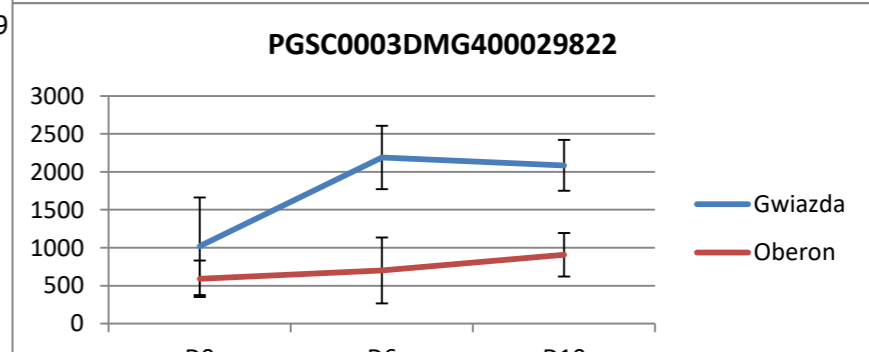

PGSC0003DMG400030427

PGSC0003DMG400032124 1174 2409,3 2122,7 946,67 4040 4109 36,66 769,48 243,07 101,28 83,81 41,01

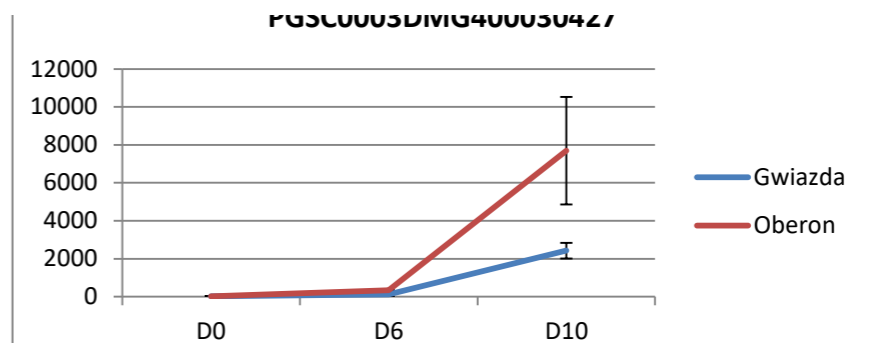

PGSC0003DMG400033931 11,33 71,33 400 1,33 222 43 3,06 52,17 172,94 2,31 67,73 1,41

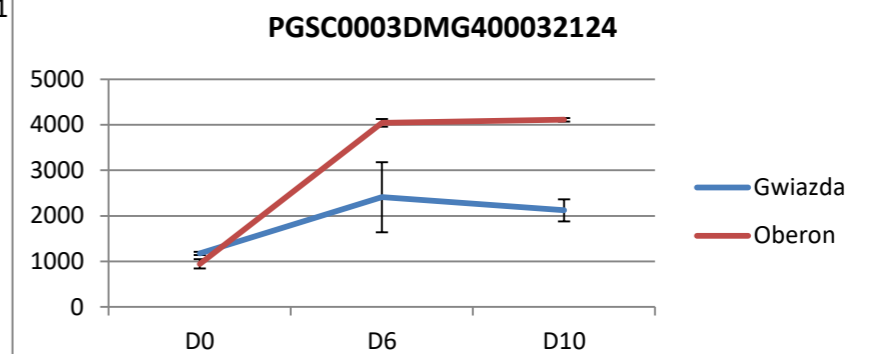

PGSC0003DMG400034307 8239,33 13506 11898 4480,7 8089,33 8027 3153,69 2153,97 1529,67 1212,31 3226,37 595,38

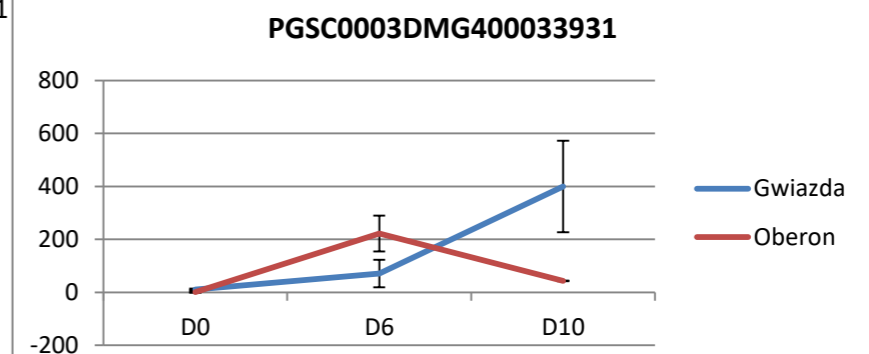

PGSC0003DMG400043108 36,67 196 232,67 27,33 392,67 110 11,72 60 63,51 11,72 129,56 11,31

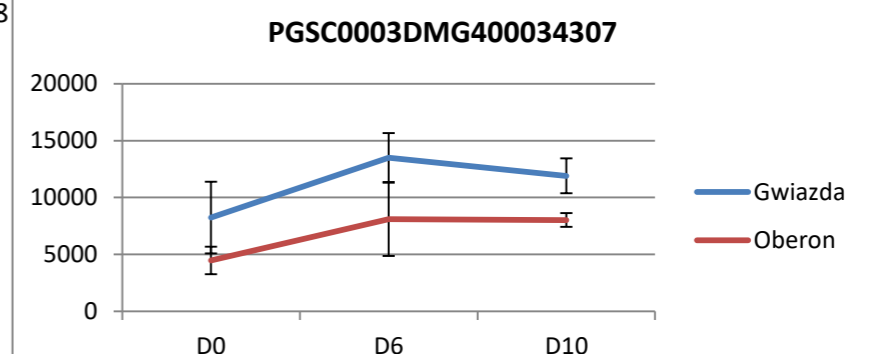

PGSC0003DMG400045865 104 377,67 1271,7 444,33 1701 4487 180,13 119,44 472,45 544,69 572,42 609,53

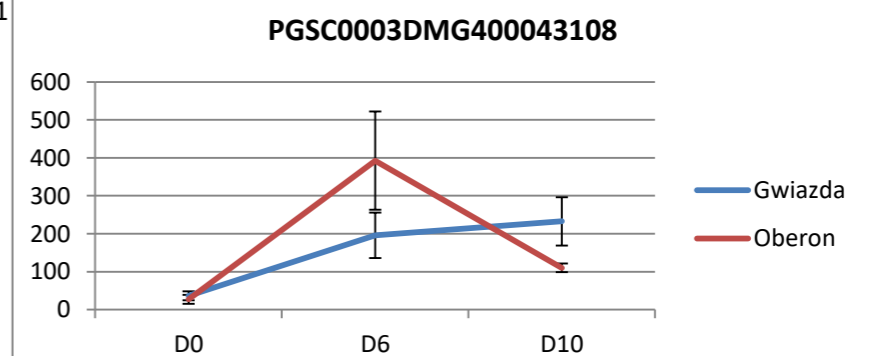

PGSC0003DMG400045865



**PGSC0003DMG400047155** 11,33 230 376,67 0,67 78,67 136 3,06 113,86 114,01 1,15 11,02 42,43

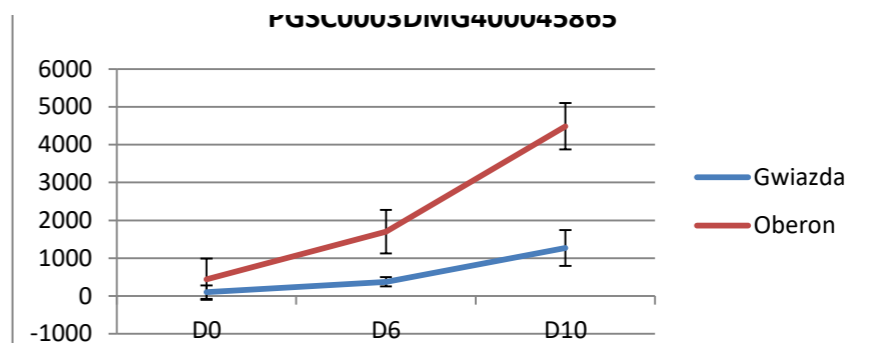

**PGSC0003DMG401005180** 92,33 366 257,33 63 20,67 40,5 85,94 91,1 78,69 55,56 35,8 36,06

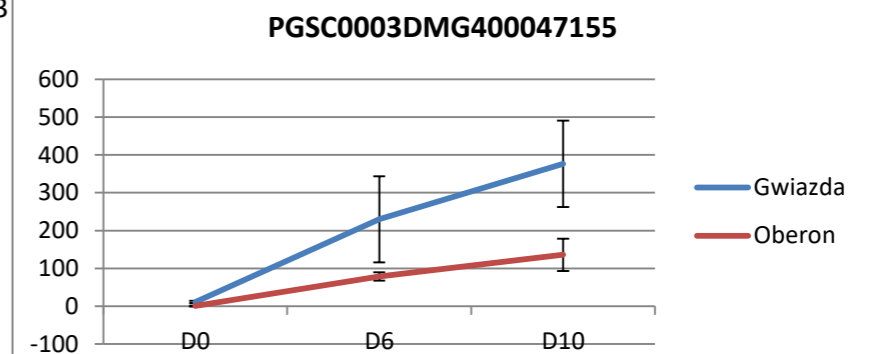

**PGSC0003DMG401015935** 11,33 490,67 2334,7 10 133,33 910 14,47 327,82 572,47 3,46 12,22 534,57

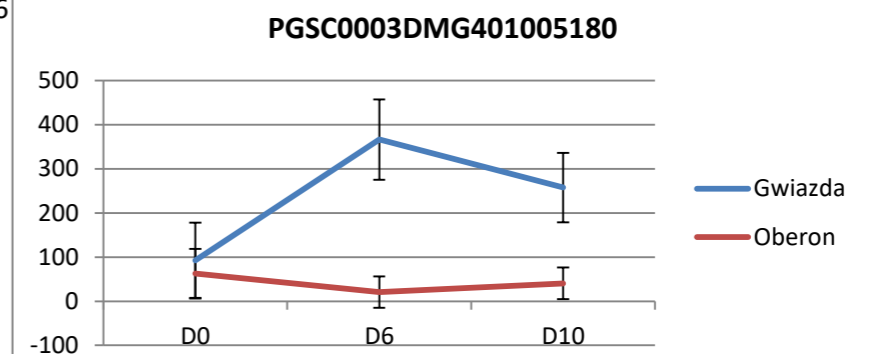

**PGSC0003DMG401017626** 395,33 1315,3 4904,7 354 732,67 2584 49,08 533,4 545,58 102,24 255,22 531,74

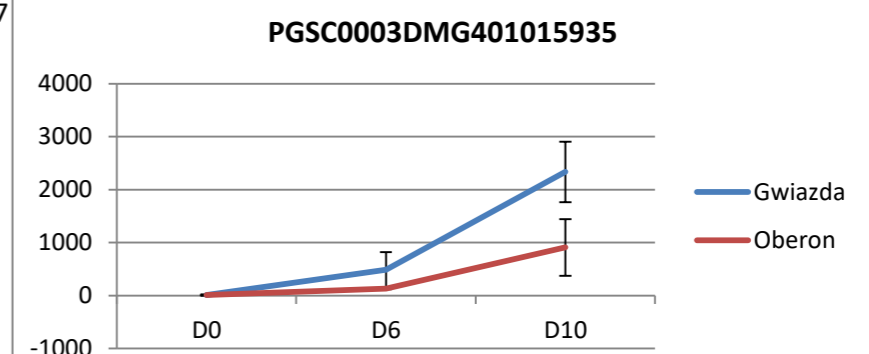

**PGSC0003DMG401020664** 631,67 2111,3 1150,7 455 1225,33 365 220,18 732,78 96,69 104,73 218,05 18,38

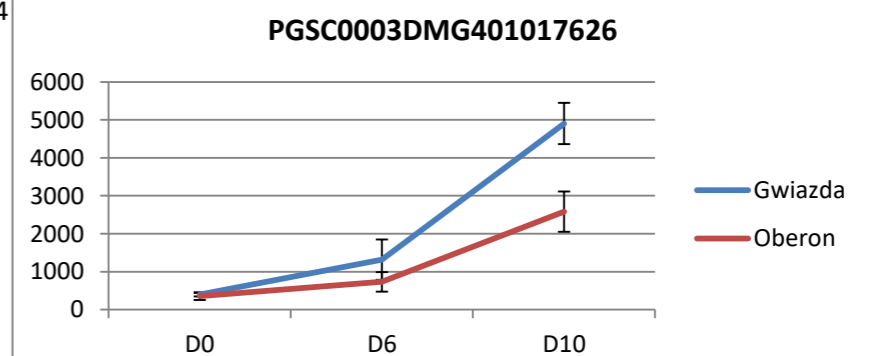

**PGSC0003DMG401020664**

PGSC0003DMG401023446 226 848,67 452 125,33 322,67 237 27,78 453,98 83,59 28,87 208,1 77,78

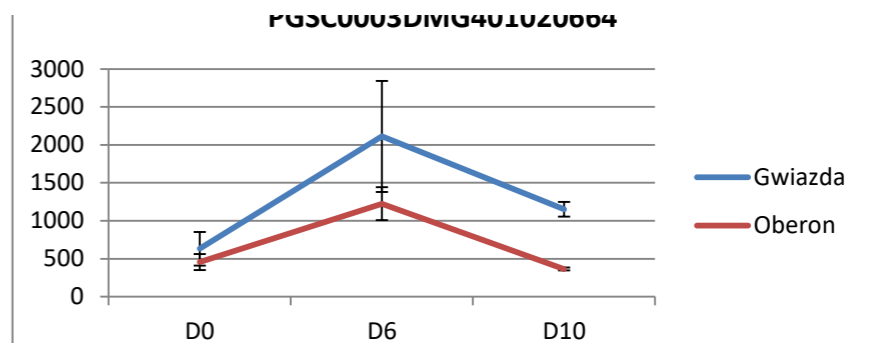

PGSC0003DMG401026044 618 2813,3 2977 419,33 1503,67 1819 43,59 808,52 473,36 63,76 516,09 193,75

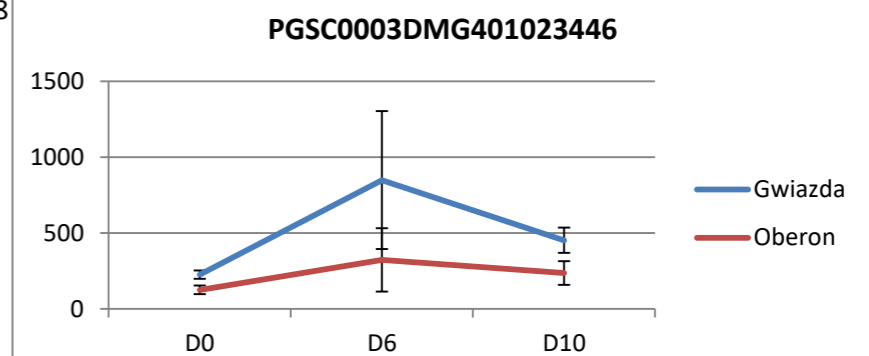

PGSC0003DMG402007944 10 716,67 162,67 1,33 5410,67 727 9,17 491,29 72,01 1,15 2681,69 97,58

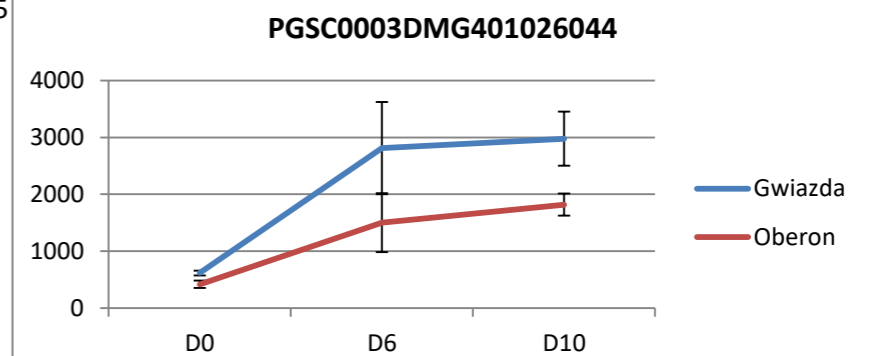

PGSC0003DMG402022579 50,67 229,33 838 16 66 203 15,01 12,06 259,35 7,21 10,58 9,9

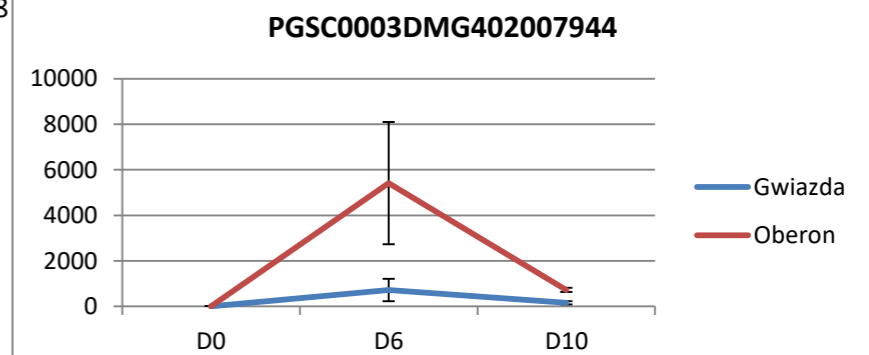

PGSC0003DMG402028907 473,33 3156,7 49239 619 5430,33 109157 59,01 723,34 5235,15 68,51 1344,33 53572,53

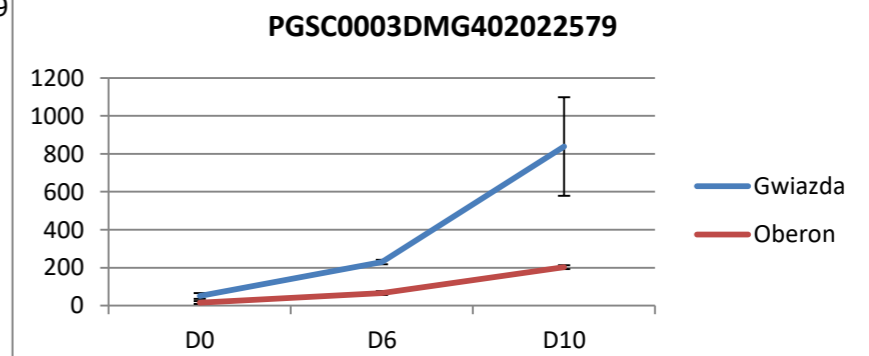

PGSC0003DMG402031741 954 1432,7 1620 612,67 630,67 539 272,08 318,18 322,16 202,33 408,59 179,61

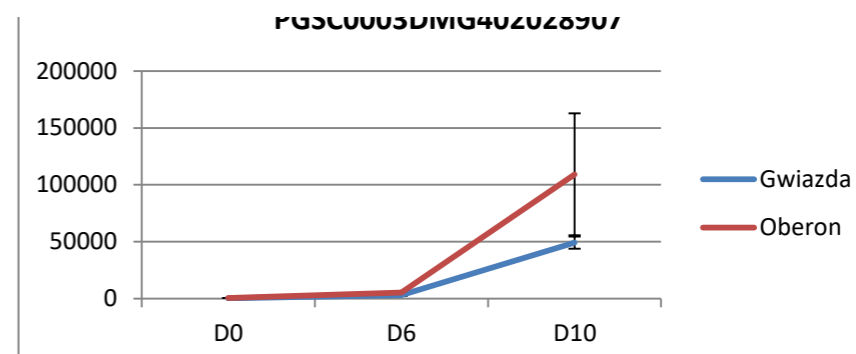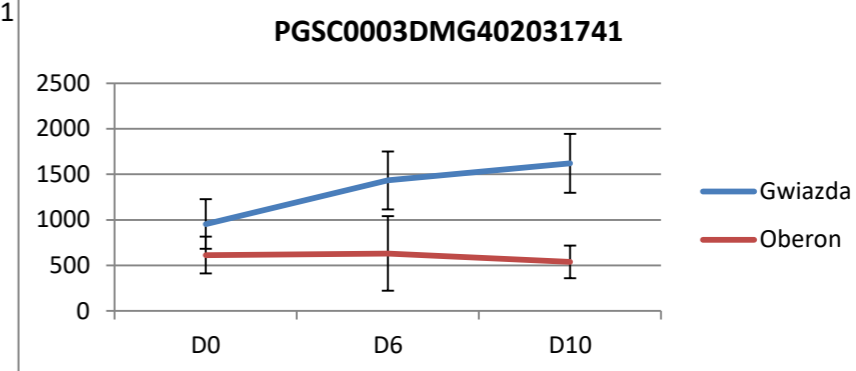

**Table S1 Comparison of the normalized number of reads for transcripts derived from genes identified in the first round of selection (594 genes) during the time course of the drought experiment. Gray color indicates the selected genes after the second round of selection. The mean value of the normalized reads per million is shown for selected potato transcripts that were downregulated in the Gwiazda plants compared to those in the Oberon plants. The data are shown for days 0, 6, and 10 of the drought experiment and were obtained from three biological replicates. The SD at day 0 was never statistically significant ( $P > 0.05$ ), while the SDs at day 6 and day 10 were always statistically significant ( $P < 0.05$ , see also Fig. 5). Potato gene accession numbers were obtained from the Spud DB ([www.potato.plantbiology.msu.edu](http://www.potato.plantbiology.msu.edu)). SD - standard deviations.**

| Gene accession numbers | Gwiazda reads mean value |         |        | Oberon reads mean value |        |      | Gwiazda SD |         |        | Owacja SD |         |        |
|------------------------|--------------------------|---------|--------|-------------------------|--------|------|------------|---------|--------|-----------|---------|--------|
|                        | D0                       | D6      | D10    | D0                      | D6     | D10  | D0         | D6      | D10    | D0        | D6      | D10    |
| PGSC0003I              | 154                      | 0       | 0      | 176                     | 126,67 | 38   | 72,99      | 0       | 0      | 55,75     | 9,24    | 8,49   |
| PGSC0003I              | 447,33                   | 119,33  | 169,33 | 384,67                  | 256,67 | 375  | 59,34      | 33,25   | 50,77  | 37,86     | 76,56   | 69,3   |
| PGSC0003I              | 365,33                   | 168,67  | 41,33  | 607,33                  | 652,67 | 278  | 139,03     | 31,01   | 37,75  | 254,26    | 454,02  | 104,65 |
| PGSC0003I              | 487,33                   | 238     | 148    | 622                     | 855,33 | 435  | 161,86     | 73,51   | 28,35  | 241,72    | 463,43  | 89,1   |
| PGSC0003I              | 24316                    | 13704,7 | 3838,7 | 16590                   | 8044   | 2247 | 5757,96    | 2149,29 | 595,34 | 1424,32   | 1845,73 | 598,21 |

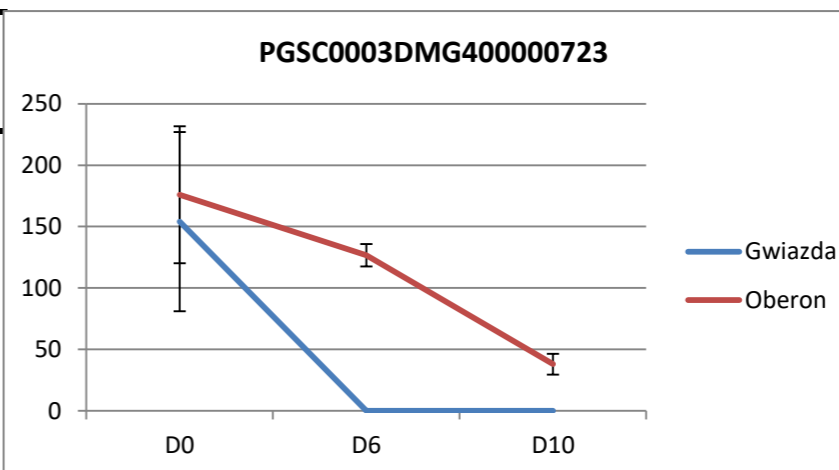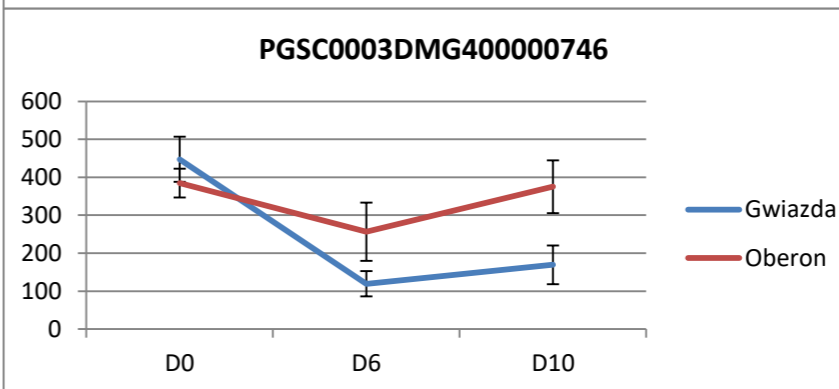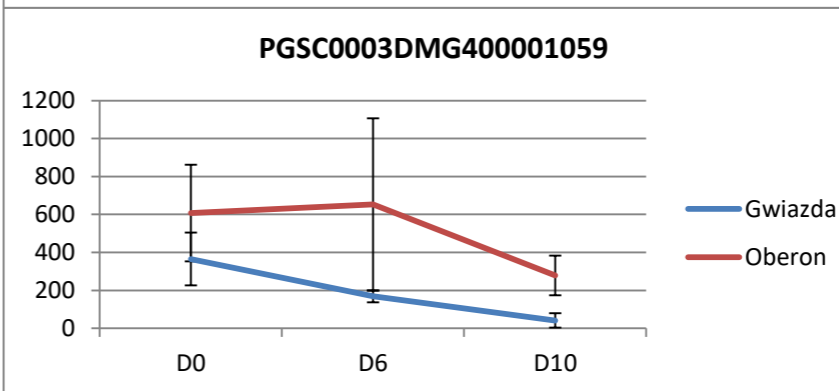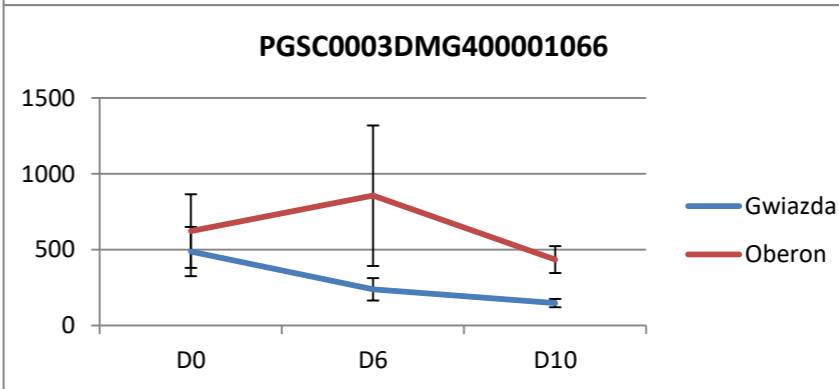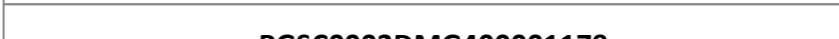

PGSC0003I 3528,67 828,67 226,67 5106,67 3750 966 1660,81 372,22 93,09 2109,04 865,04 311,13

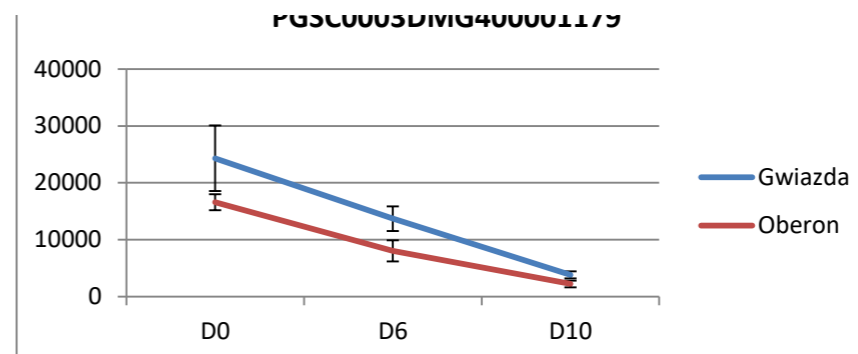

PGSC0003I 12024,7 4533,33 2997,3 15102,7 9184 5500 3681,99 1120,61 487,5 3814,03 4348,95 299,81

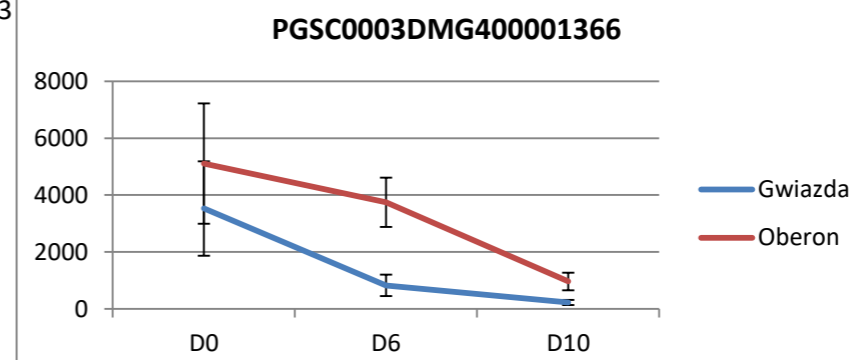

PGSC0003I 17990 2802 1880 23061,3 8048 3806 2235,49 107,01 330,29 1090,95 934,62 755,19

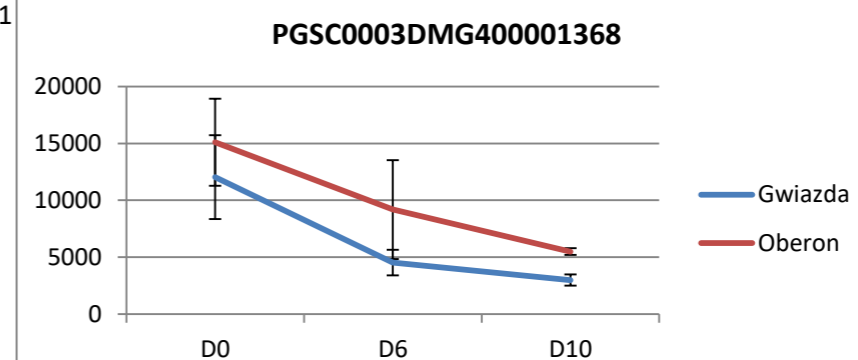

PGSC0003I 333,33 57,33 20,67 586 800,67 104 260,04 57,77 18,58 260,37 583,21 42,43

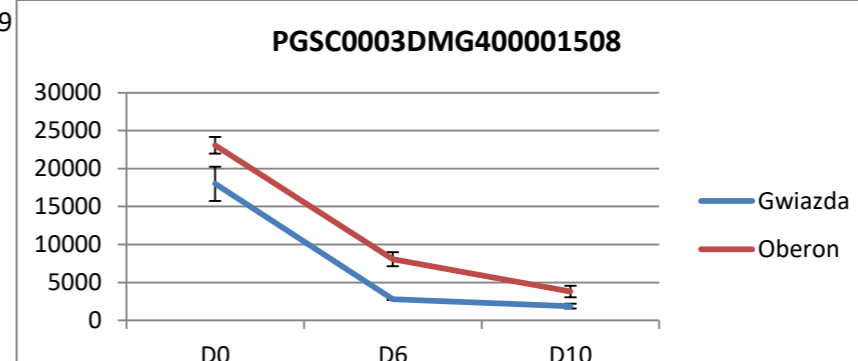

PGSC0003I 1843,33 288 64 1988,67 791,33 191 634,46 57,17 13,11 508,13 515,3 15,56

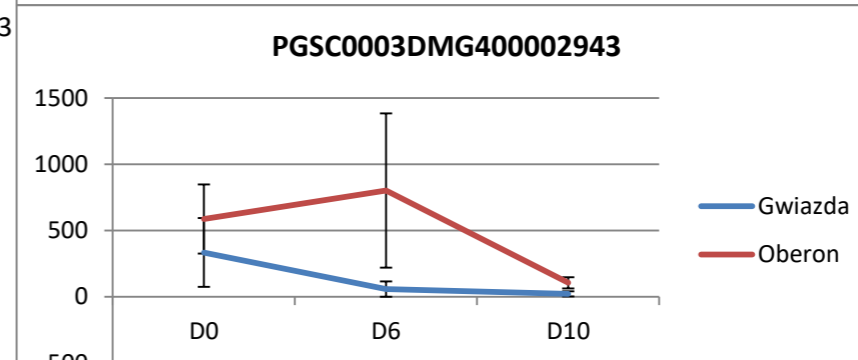

PGSC0003DMG400002929

PGSC0003I 1294,67 137,33 113,33 862 318 242 584,69 67,12 35,12 225,25 64,37 28,28

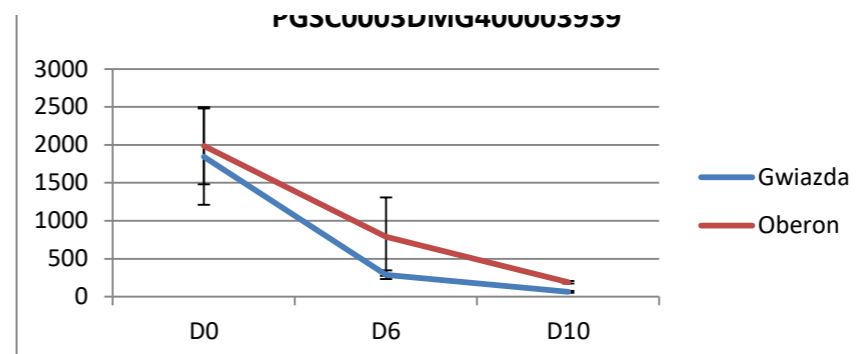

PGSC0003I 445,33 86 75,33 292 196 171 92,46 43,86 40,07 86,56 53,03 60,81

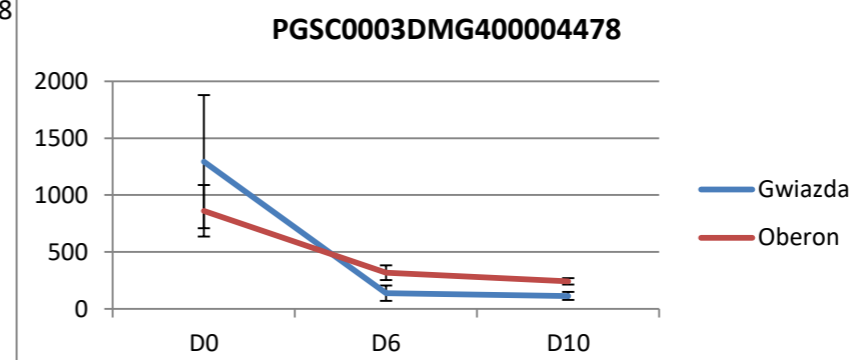

PGSC0003I 1655,33 868 914,67 1687,33 1927,33 1426 364,12 411,13 133,05 279,82 299,07 45,25

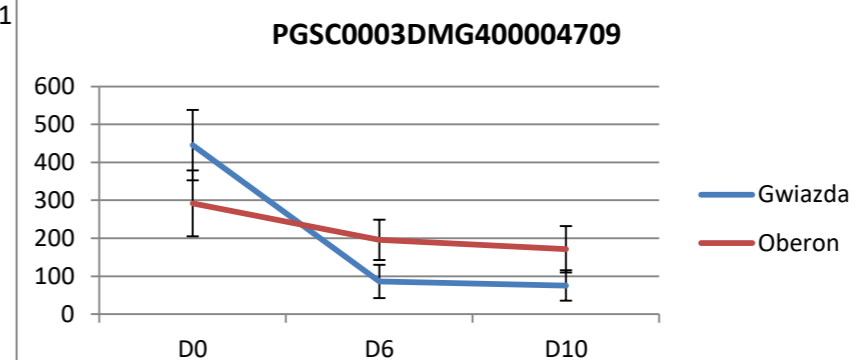

PGSC0003I 556 248,67 162 661,33 505,33 314 71,36 17,47 66,9 141,89 117,17 65,05

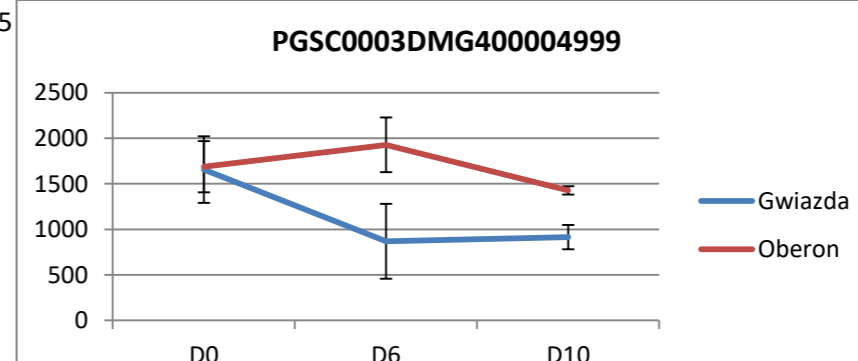

PGSC0003I 213,33 79,33 85,33 239,33 199,33 180 24,11 47,43 26,63 14,47 66,16 8,49

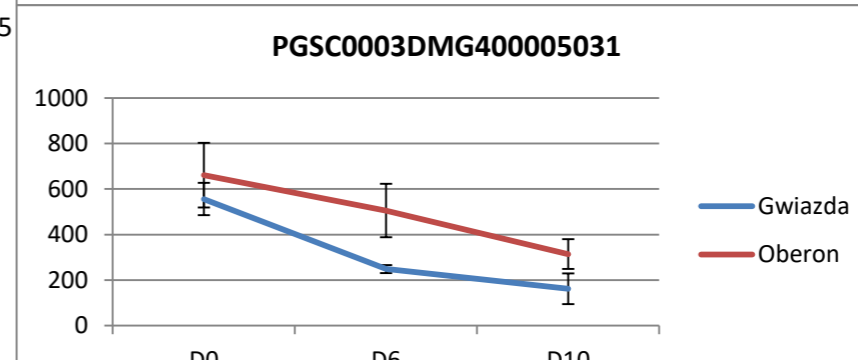

PGSC0003DMG400005038

PGSC0003I 1272,67 590 628,67 1245,33 1232,67 1106 103,56 178,3 61 115,49 128,1 203,65

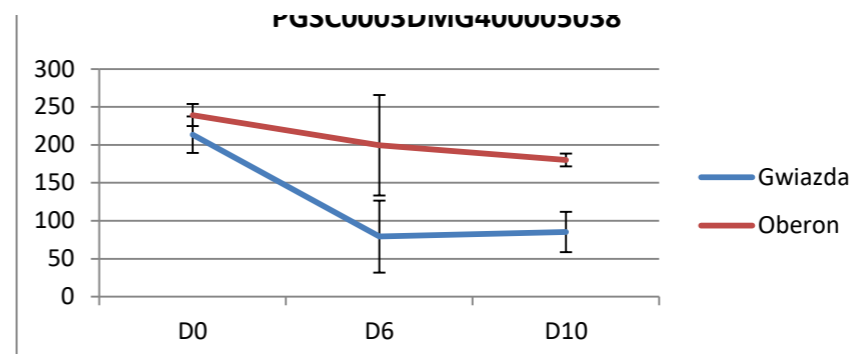

PGSC0003I 1047,33 219,33 67,33 1400,67 790,67 160 342,07 54,05 45,71 38,44 593,03 36,77

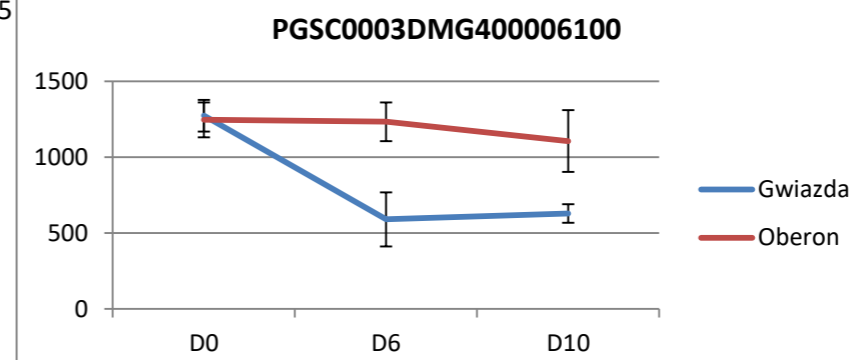

PGSC0003I 729,33 186,67 100,67 776,67 824,67 417 396,63 109,28 31,01 333,52 388,34 239

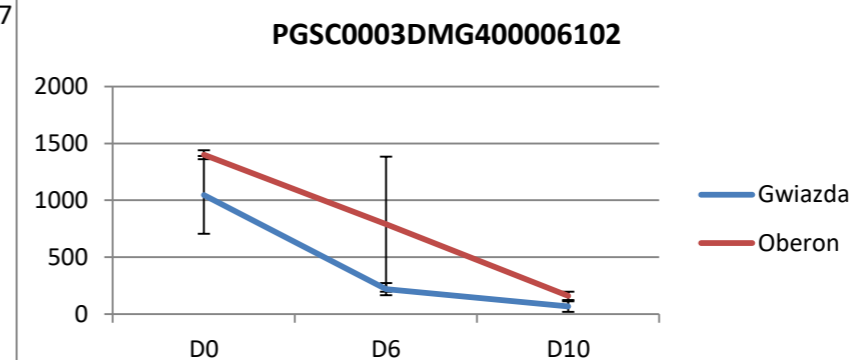

PGSC0003I 986,67 352 490 1194,67 779,33 909 246,98 69,4 55,68 272,15 464,66 89,1

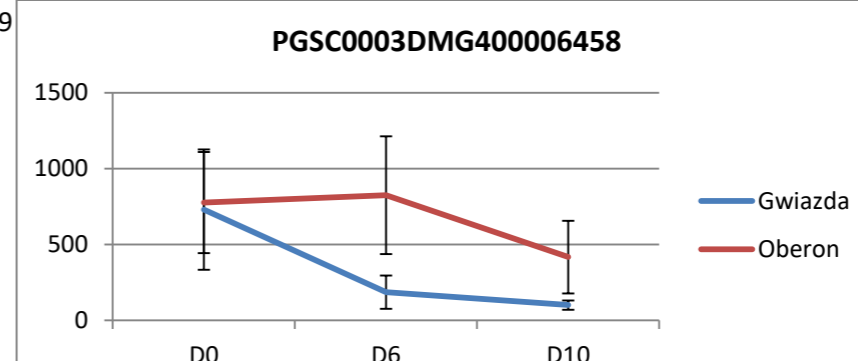

PGSC0003I 342 0 47,33 446,67 66,67 179 58,92 0 41,3 141,74 76,38 49,5

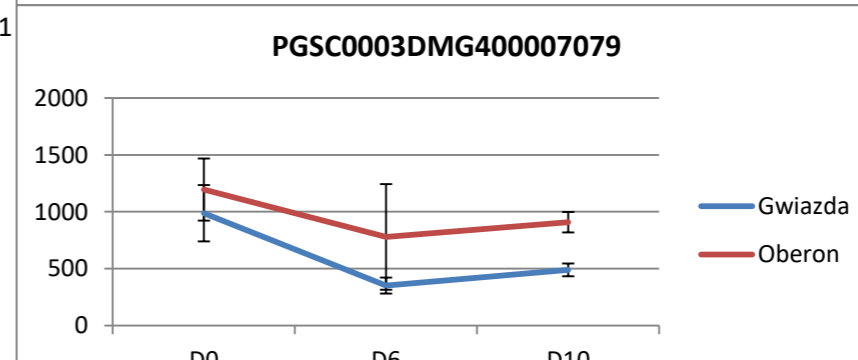

PGSC0003DMG400007112

|           |         |        |        |         |         |      |        |        |       |         |        |        |
|-----------|---------|--------|--------|---------|---------|------|--------|--------|-------|---------|--------|--------|
| PGSC0003I | 703,33  | 38,67  | 51,33  | 878     | 161,33  | 182  | 100,11 | 40,07  | 23,09 | 303,11  | 46,36  | 87,68  |
| PGSC0003I | 494,67  | 120    | 82     | 558     | 270,67  | 246  | 106,01 | 2      | 34,12 | 122,05  | 119,1  | 62,23  |
| PGSC0003I | 264,67  | 32,67  | 25,33  | 388     | 132,67  | 72   | 138,02 | 25,79  | 12,22 | 53,03   | 30,62  | 8,49   |
| PGSC0003I | 1106,67 | 530,67 | 404,67 | 1347,33 | 1898,33 | 1086 | 89,27  | 89,32  | 81,05 | 252,11  | 731,87 | 2,83   |
| PGSC0003I | 3052,67 | 438    | 164,67 | 4667,33 | 1912    | 821  | 536,77 | 113,42 | 19,22 | 1690,01 | 477,06 | 227,69 |

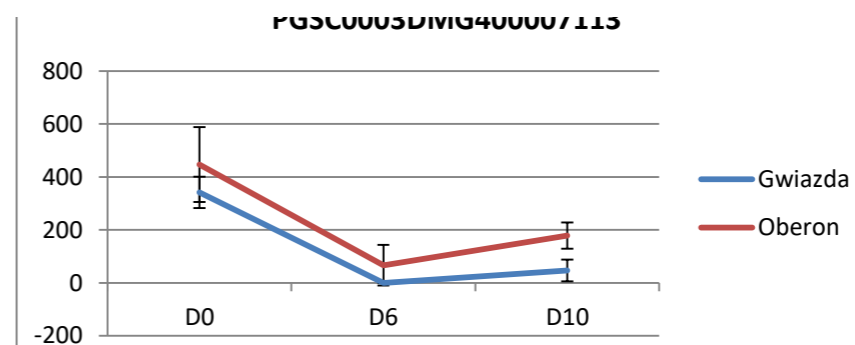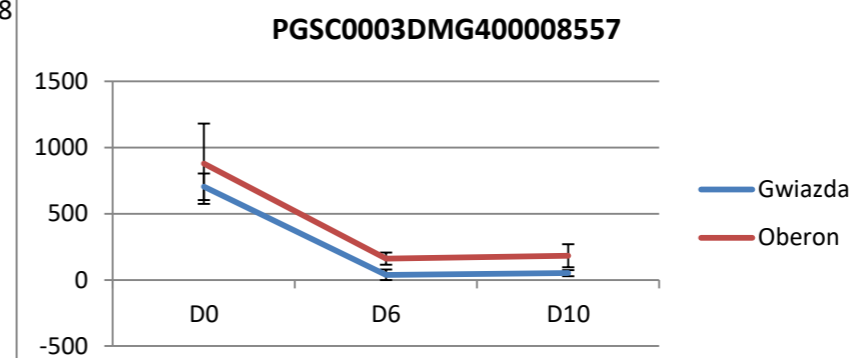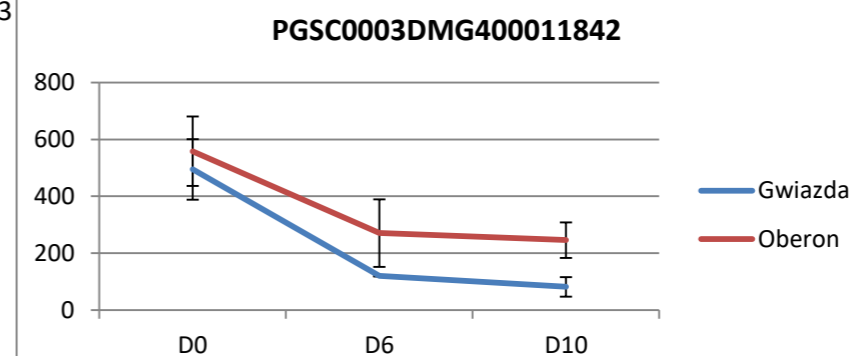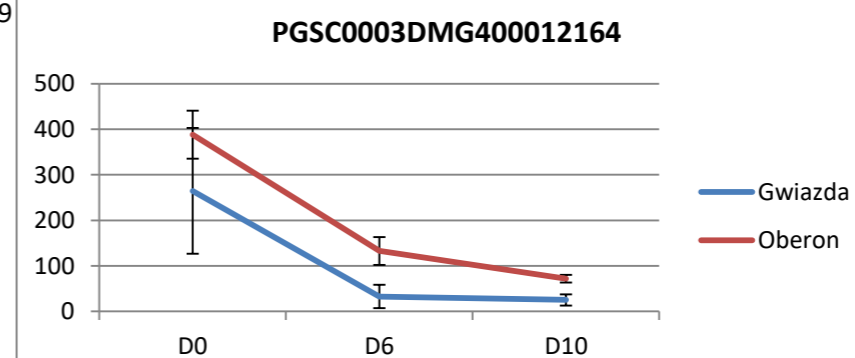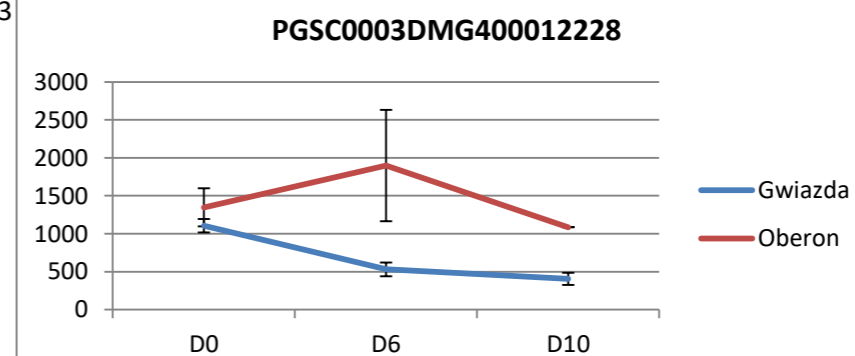

**PGSC0003DMG400013417**



PGSC0003I 1071,33 108,67 23,33 1211,33 747,33 137 760,62 50,85 24,03 244,01 653,76 100,41

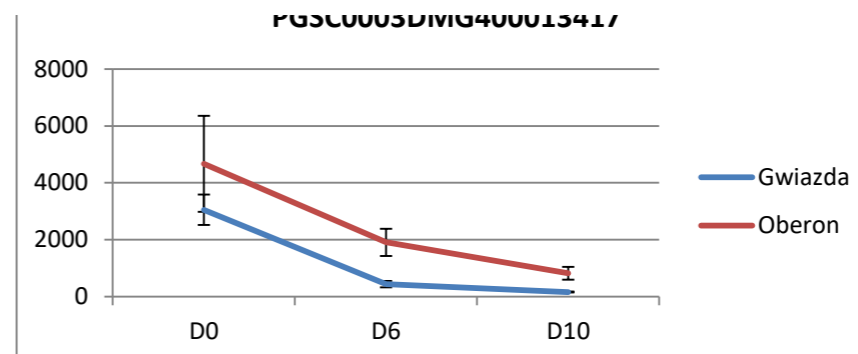

PGSC0003I 10578 1413,33 298 13800,7 5364 2037 3031,66 443,33 66,09 2986,94 3359,53 278,6

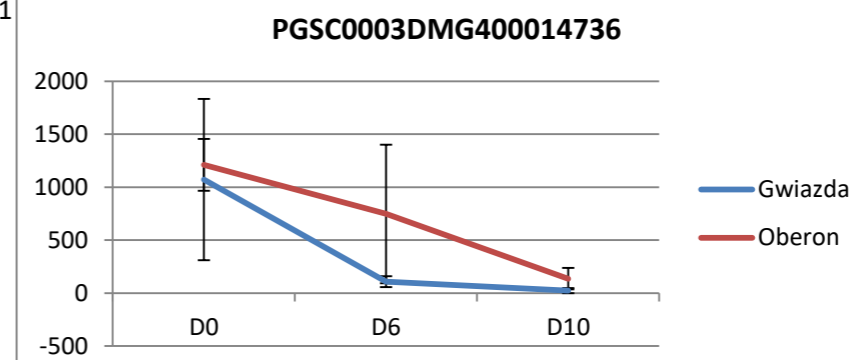

PGSC0003I 395,33 78,67 81,33 439,33 264 168 124,09 17,93 8,33 122,66 79,77 8,49

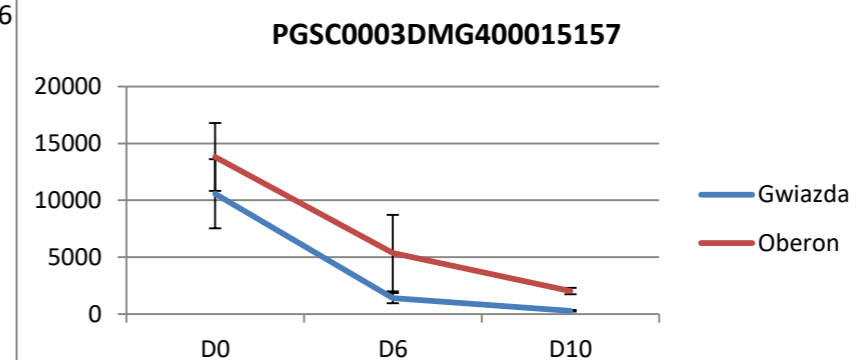

PGSC0003I 1732 1014 349,33 1610,67 532,67 174 147,63 309 33,61 54,78 304,22 14,14

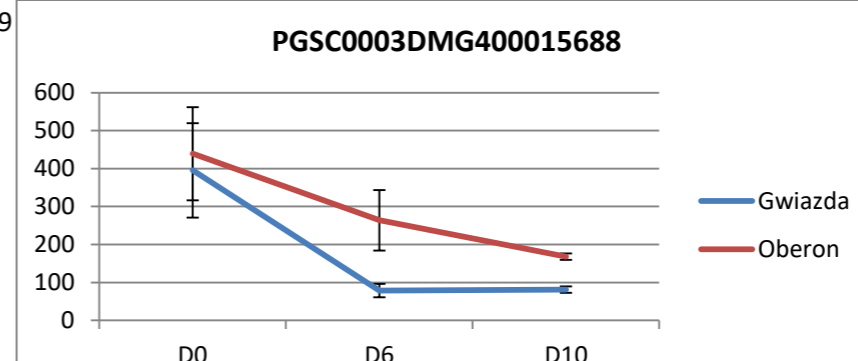

PGSC0003I 40451,3 15839,3 4060 37915,3 47421,3 15041 6668,71 1953,1 195,47 2792,33 5787,03 3132,48

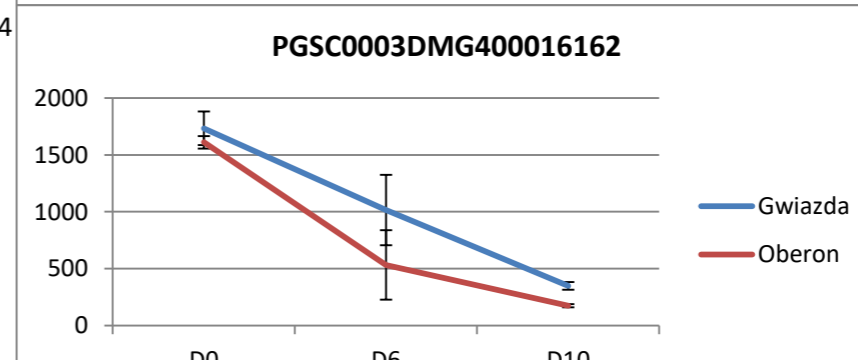

PGSC0003DMG400016452

PGSC0003I 316,67 10 3,33 344,67 499,33 75 222,39 14 3,06 127,91 412,08 57,98

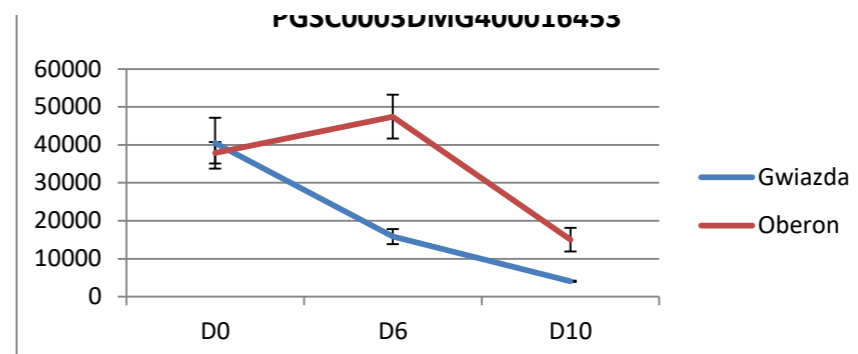

PGSC0003I 2710 1626,67 1584 3016 3442 2875 302,67 302,11 197,8 345,2 596,71 338

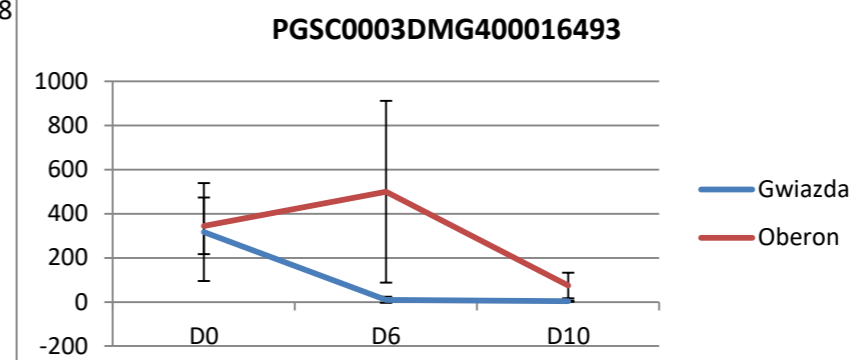

PGSC0003I 4072,67 1912,67 1988,7 3954 3384,67 3376 340,71 387,53 277,38 282,89 699,61 98,99

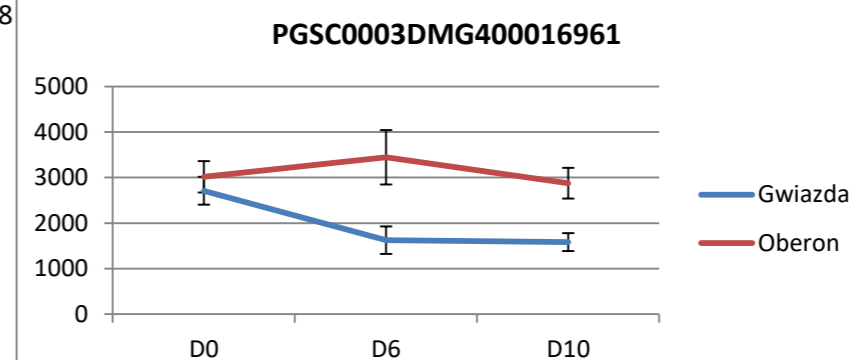

PGSC0003I 1574 285,33 480,67 1648,67 1152 2091 785,59 178,99 75,08 686,02 599,04 1288,35

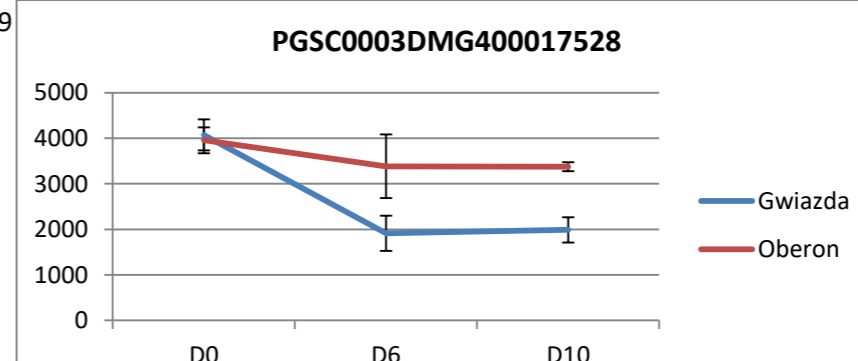

PGSC0003I 740 244 288 835,33 846,67 507 399,39 76,6 73,02 178,91 619 148,49

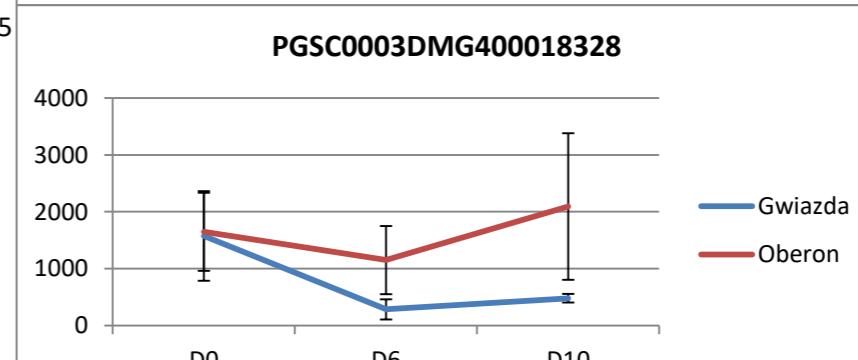

PGSC0003DMG400018452

PGSC0003I 314,67 28 34,67 436,67 114 112 114,09 48,5 6,11 90,72 29,05 31,11

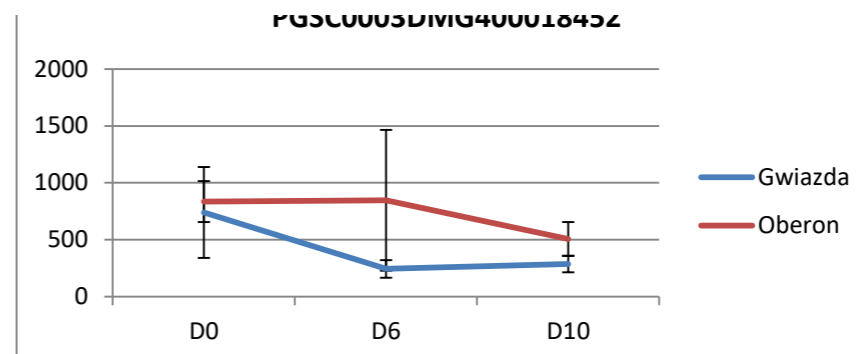

PGSC0003I 1705,33 270,67 68 1471,33 988,67 255 696,92 63,13 48,12 61 643,66 52,33

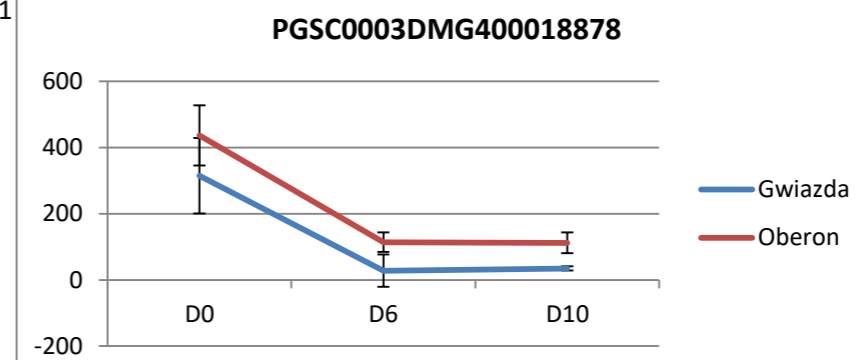

PGSC0003I 146,67 22,67 17,33 109,33 105,33 113 45 20,53 30,02 52,2 40,41 38,18

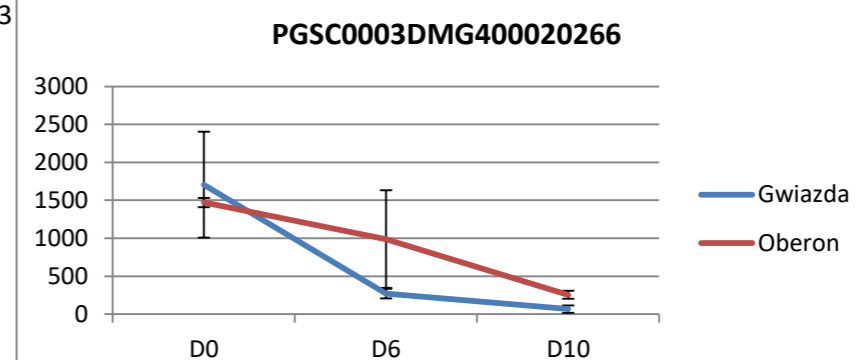

PGSC0003I 256,67 38 6 306 134 40 138,16 20,88 5,29 82,78 99,02 0

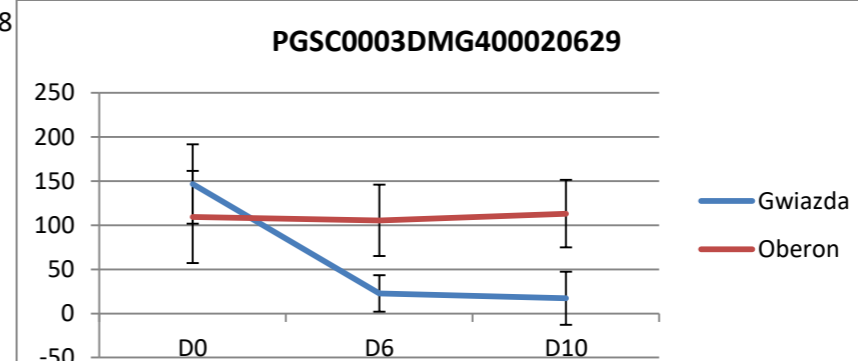

PGSC0003I 4218,67 1955,33 1872,7 3266 3644 2820 1075,33 335,16 372,29 488,77 1022,29 229,1

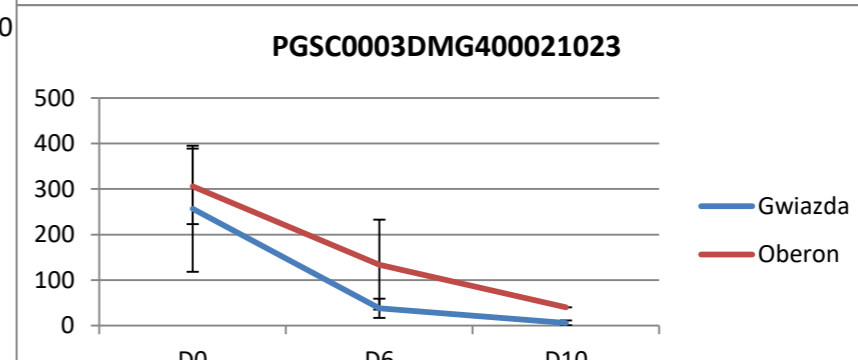

PGSC0003DMG400021844

PGSC0003I 608 314 238 556,67 832,67 449 112,41 54,99 39,4 37,22 78,62 69,3

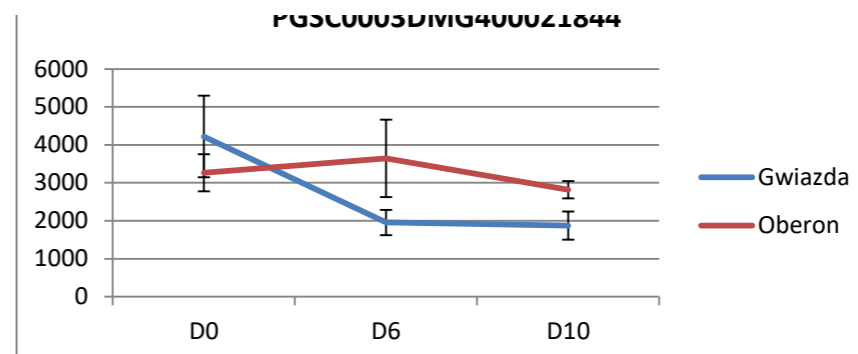

PGSC0003I 2088,67 618,67 208,67 2398 1419,33 621 787,33 77,6 18,15 542,21 551,24 346,48

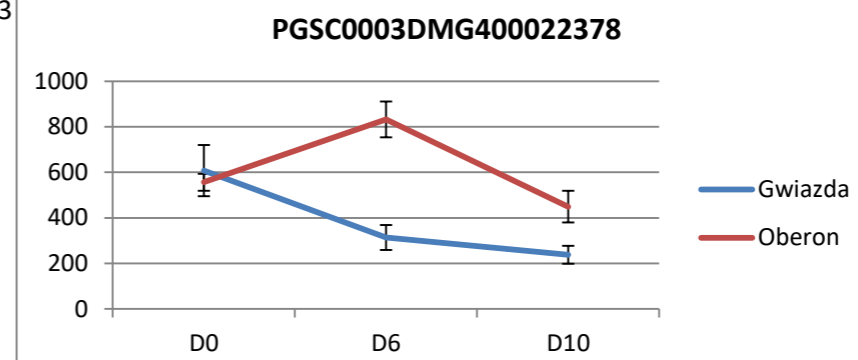

PGSC0003I 2474,67 820 467,33 3124,67 1548 1265 153,13 184,81 115,49 959,18 245,5 485,08

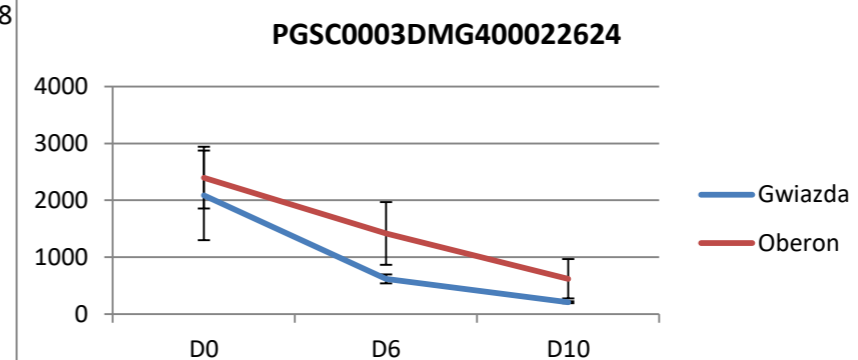

PGSC0003I 754,67 168 254,67 847 484,33 553 133,36 37,47 95,04 163,5 249,72 25,46

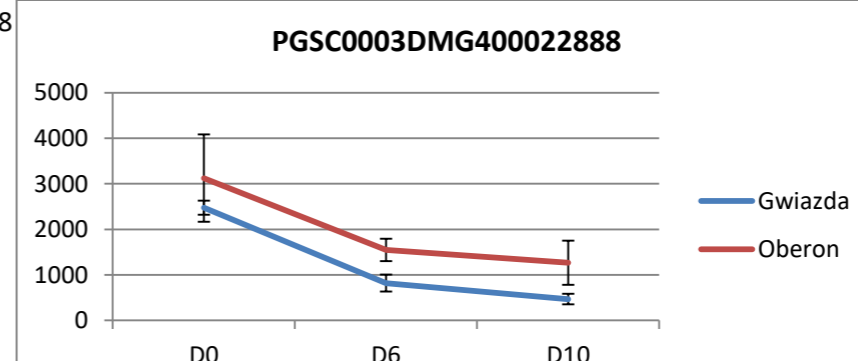

PGSC0003I 336,67 115,33 93,33 425,33 347,33 225 95,02 12,86 3,06 69,41 89,72 4,24

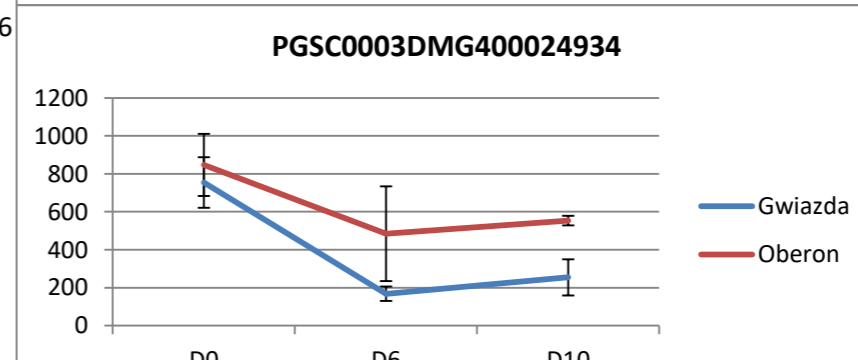

PGSC0003DMG400025000

PGSC0003I 14122,7 5350,67 5410,7 9586 10309,3 12310 2014,1 1589,25 760,08 1907,22 1633,9 285,67

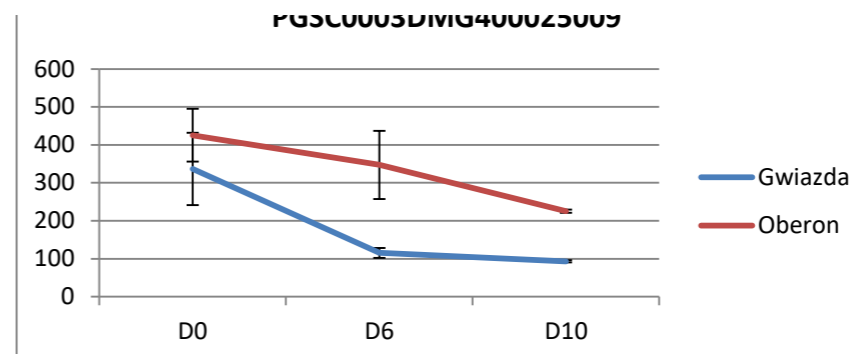

PGSC0003I 192 21,33 4 184,67 154 29 74,48 24,44 6,93 42,44 28 1,41

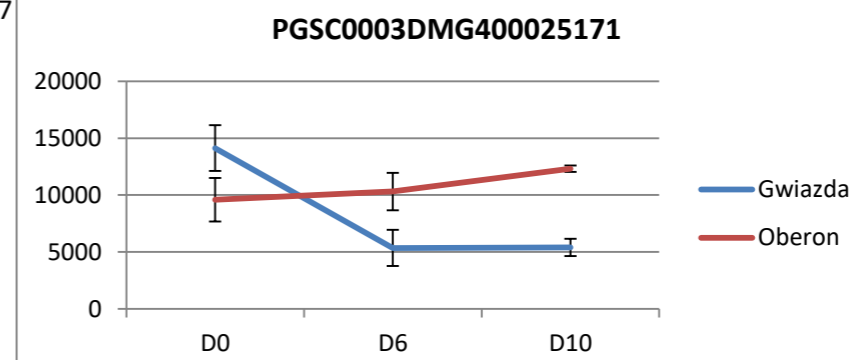

PGSC0003I 376,67 108 77,33 488 34,67 154 35,91 36,06 23,86 175,01 30,29 19,8

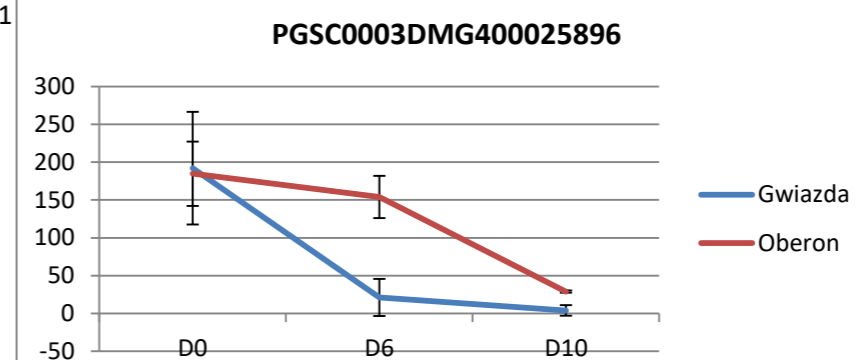

PGSC0003I 224,67 68 78 262 325,33 253 90,16 17,78 2 149,81 122,48 117,38

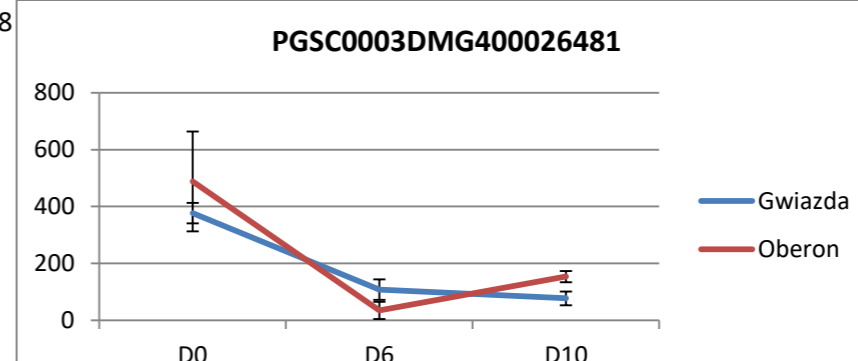

PGSC0003I 2824,67 422,67 139,33 3402,67 1030,67 323 931,63 155,39 30,62 866,42 455,11 176,78

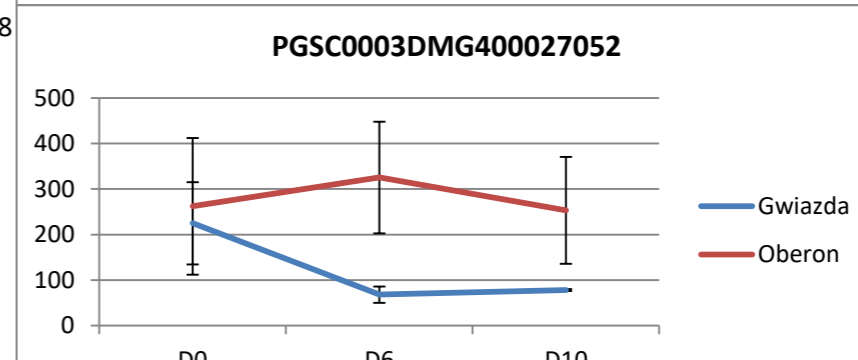

PGSC0003DMG400027256

PGSC0003I 750 85,33 0 435,33 340 33 229,5 86,01 0 204,36 180,08 46,67

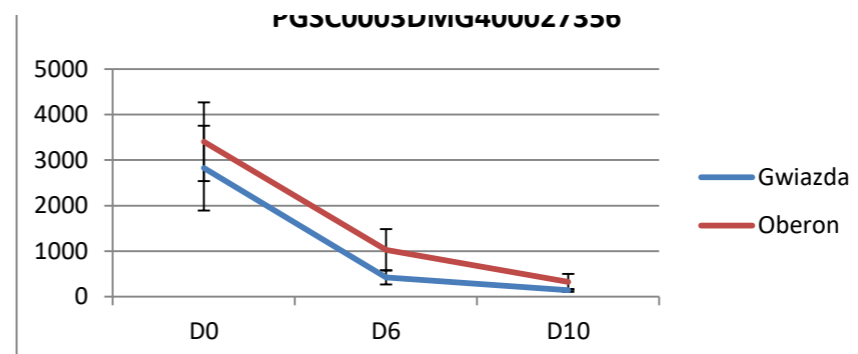

PGSC0003I 2913 773,33 697,33 3227 2113,33 1572 816,11 124,78 167,44 663,22 1214,37 647,71

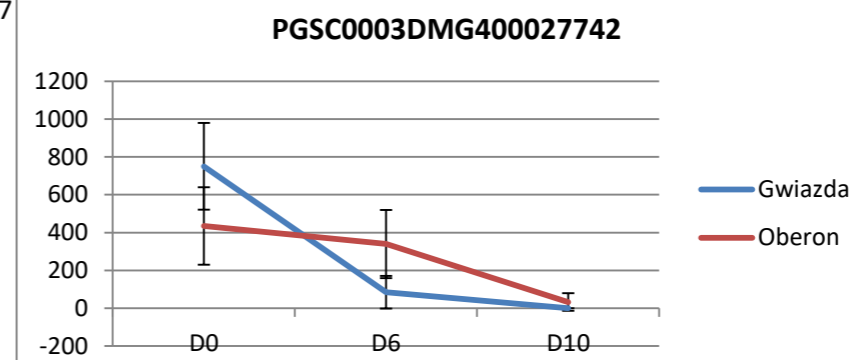

PGSC0003I 244 116,67 107,33 143,33 5,33 29 48,54 30,75 48,01 42,72 9,24 9,9

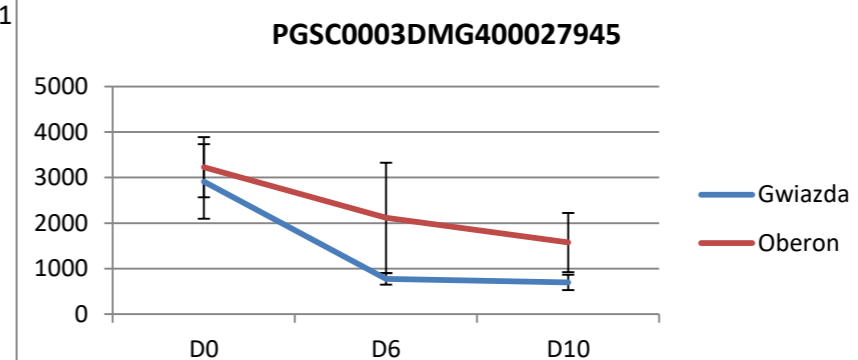

PGSC0003I 1066 572,67 688,67 1217,33 1062,67 1141 107,13 266,55 73,38 238,11 301,96 400,22

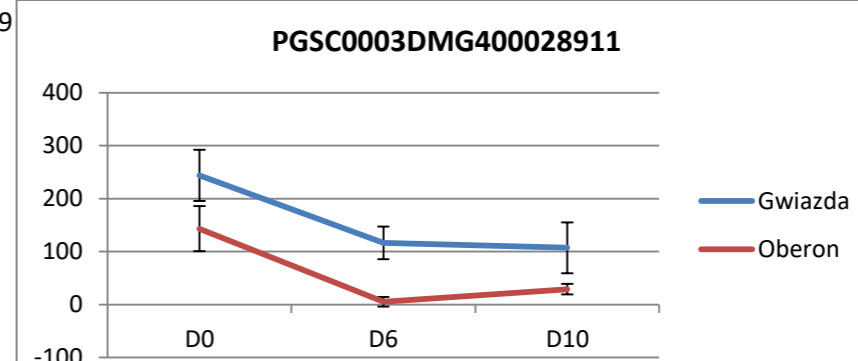

PGSC0003I 266,67 12 1,33 127,33 364 37 132,79 12 2,31 58,05 154,26 26,87

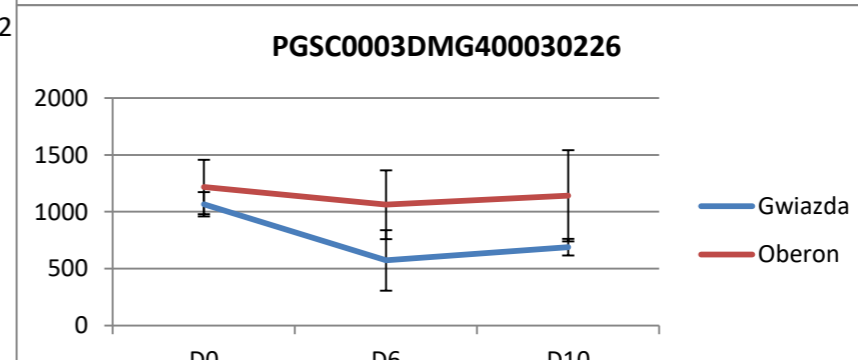

PGSC0003DMG400030242

PGSC0003I 1052,67 260 110 848,67 663,33 214 391,36 19,08 7,21 255,47 146,11 70,71

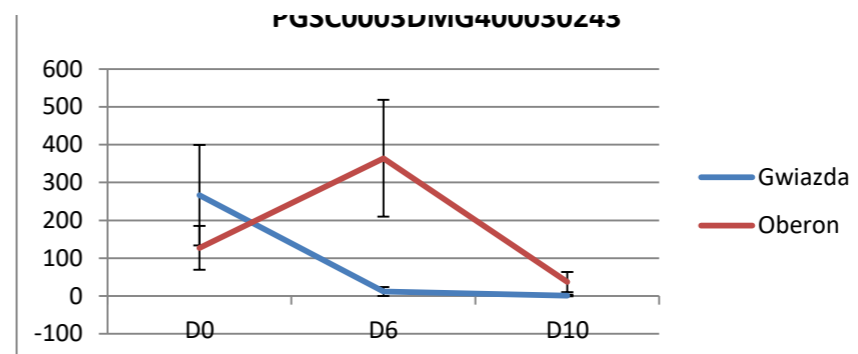

PGSC0003I 256,67 18 28,67 240 304,67 81 114,15 21,63 11,02 107,46 302,89 46,67

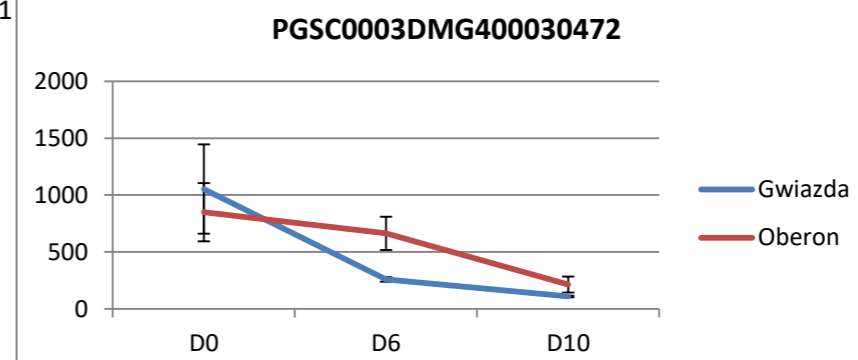

PGSC0003I 118 45,33 39,33 140 158 116 44,23 15,01 25,72 59,23 112,48 14,14

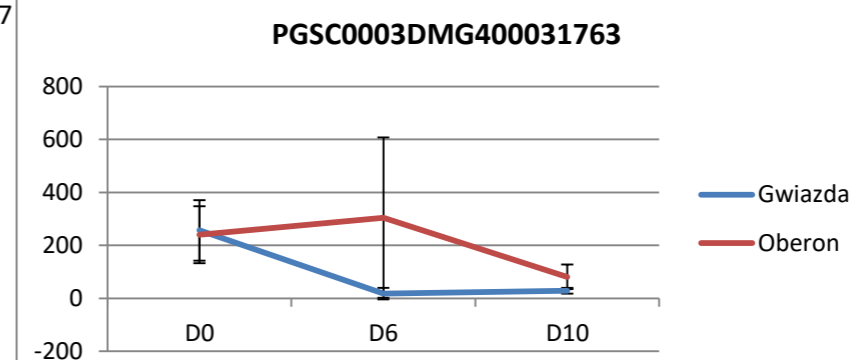

PGSC0003I 395,33 158,67 110,67 526,67 474 432 107,06 49,17 67,69 195,72 324,07 48,08

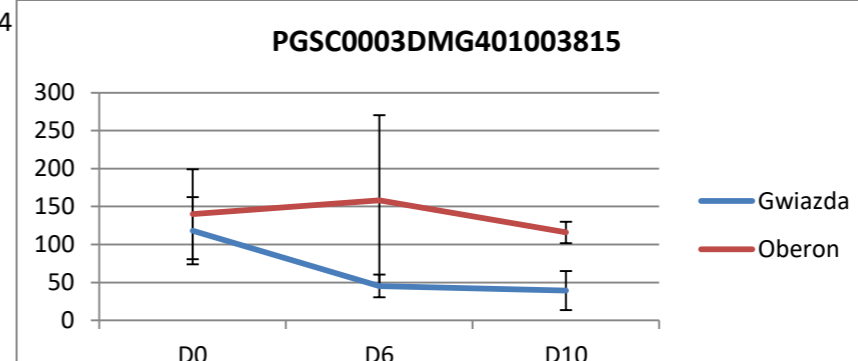

PGSC0003I 1518 744,67 574 1699,33 2122,67 972 500,57 113,44 47,62 312,03 958,02 84,85

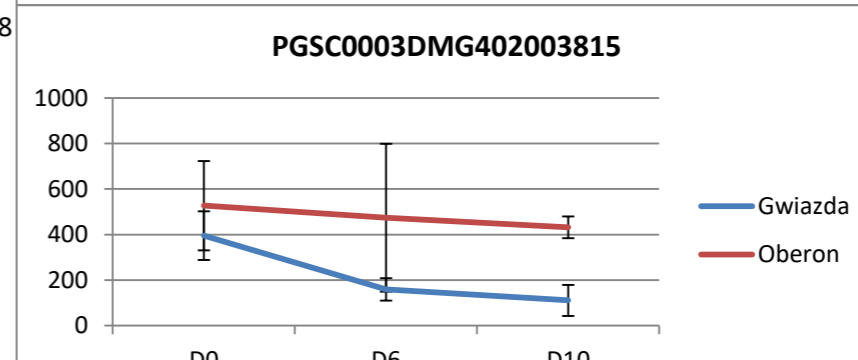

PGSC0003DMG402006147

PGSC0003I 265 0 0 699,67 269,67 299,5 260,62 0 0 1211,86 467,08 62,93

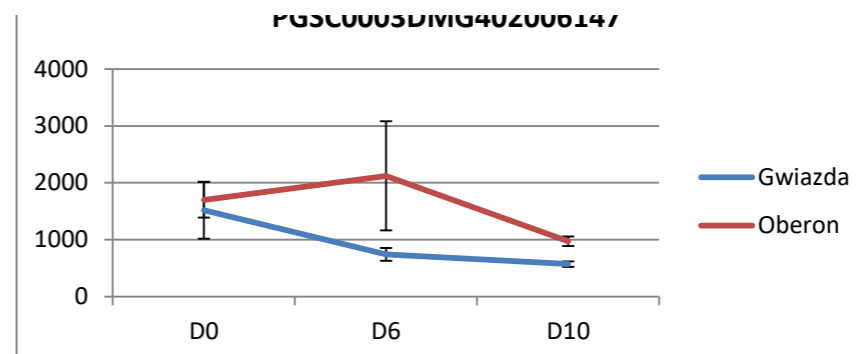

PGSC0003I 1418 347,33 302 1192,67 1316,67 769 733,23 90,18 98,97 380,23 992,22 349,31

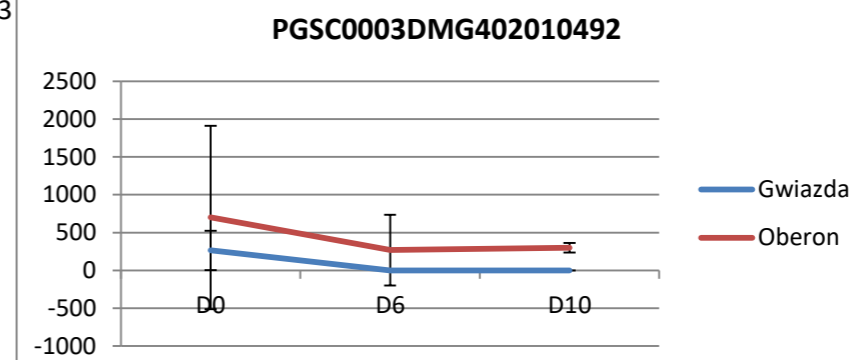

PGSC0003I 532,67 106,67 64,67 586 567,33 231 91,24 37,17 17,93 80,07 247,42 131,52

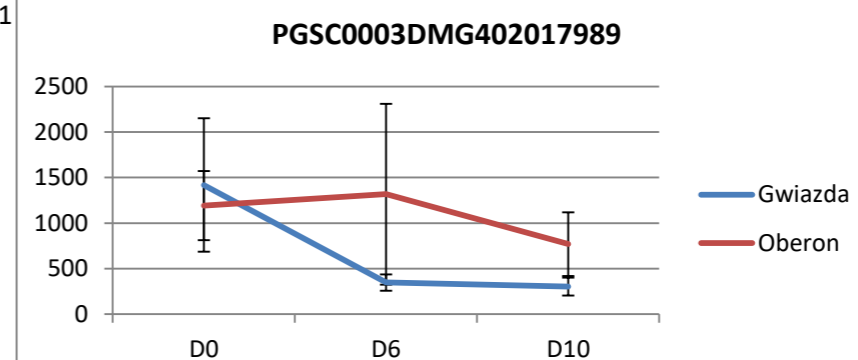

PGSC0003I 357,33 59,33 8,67 478,67 244 43 103,85 33,61 11,72 83,91 130,22 18,38

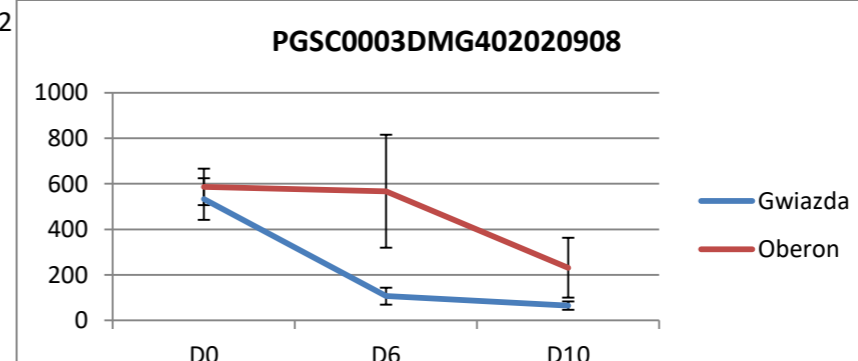

PGSC0003I 3098 1492 1548,7 2805,33 2787,33 3305 350,15 262,09 211,23 68,86 765,83 12,73

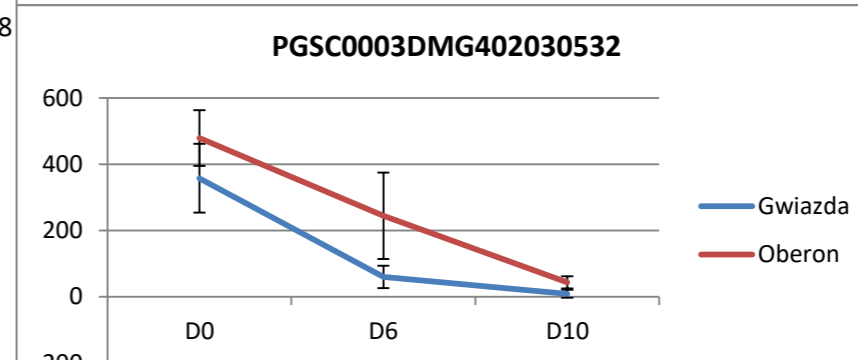

PGSC0003DMG402030822



**PGSC0003I** 942,67 75,33 169,33 1102 848 387 227,21 130,48 44,38 225,49 129,57 35,36

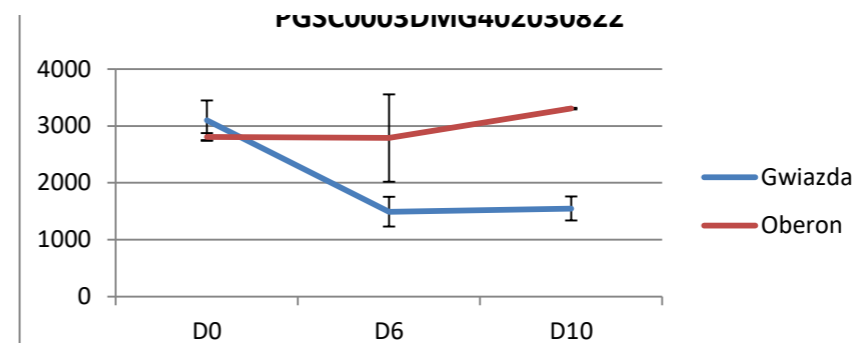

**PGSC0003I** 626,67 155,33 202,67 386,67 519,33 722 342,48 48,22 67,45 103,47 381,75 16,97

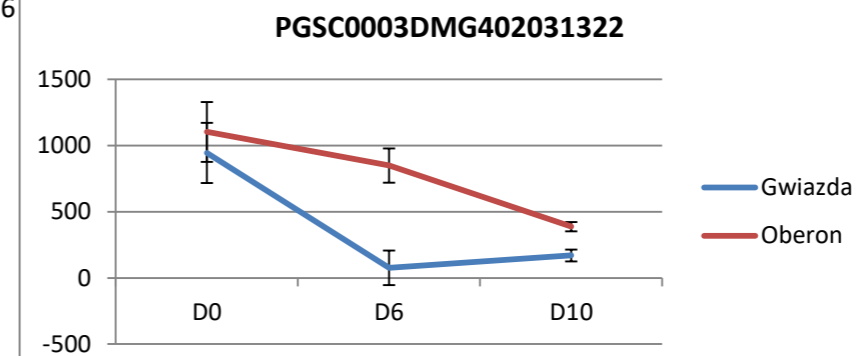

**PGSC0003I** 660 108,67 49,33 708,67 544,33 114 341,18 30,62 12,22 136,08 360,78 53,74

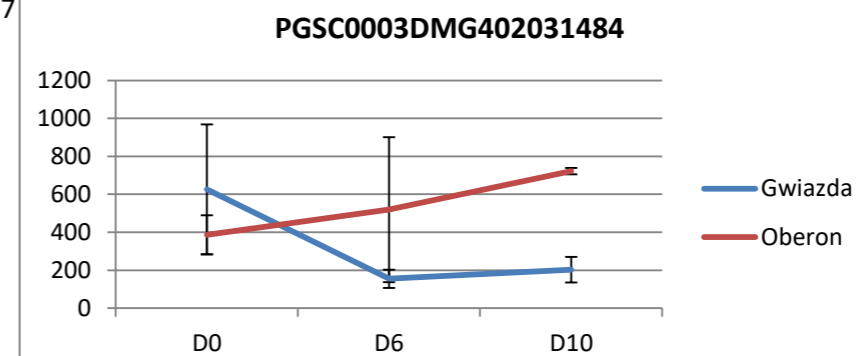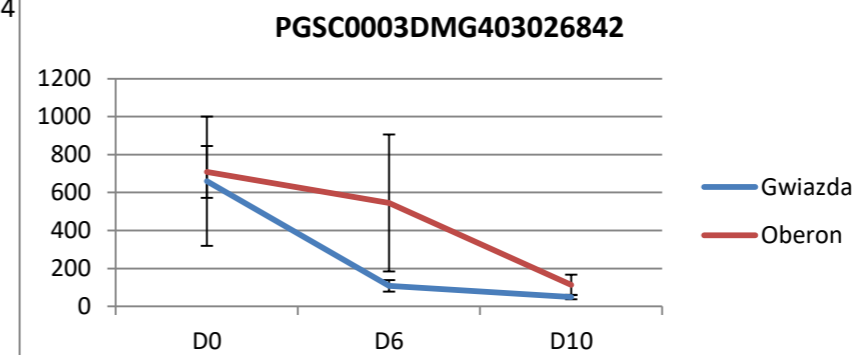

Supplement: PBI-16-603-s002.pdf [file PBI-16-603-s002.pdf]
